# Supplementary material for: Synthesis of fused tetramate-oxazolidine and -imidazolidine derivatives and their antibacterial activity
Source: Royal Society of Chemistry journal article supplement (doi:10.1039/d3ob00594a), 2023-01-01

## Supporting Information

### Synthesis of Fused Tetramate-Oxazolidine and -Imidazolidine Derivatives and their Antibacterial Activity

Liban Saney,<sup>†</sup> Tharindi Panduwawala,<sup>†</sup> Xiang Li,<sup>†,+</sup> Kirsten E. Christensen,<sup>†</sup> Miroslav Genov,<sup>‡</sup> Alexander Pretsch,<sup>‡</sup> Dagmar Pretsch,<sup>‡</sup> and Mark G. Moloney<sup>\*,†,#</sup>

<sup>†</sup>The Department of Chemistry, Chemistry Research Laboratory, University of Oxford, 12 Mansfield Road, Oxford, OX1 3TA

<sup>+</sup>Department of Pharmaceutical Engineering, China Pharmaceutical University, Nanjing, 211198, P. R. China.

<sup>#</sup>Oxford Suzhou Centre for Advanced Research, Building A, 388 Ruo Shui Road, Suzhou Industrial Park, Jiangsu, 215123, P.R. China.

<sup>‡</sup>Oxford Antibiotic Group, The Oxford Science Park, Magdalen Centre, Oxford OX4 4GA, UK.

\*[mark.moloney@chem.ox.ac.uk](mailto:mark.moloney@chem.ox.ac.uk)

#### Table of Contents

|                                                                                                                                                                                  |      |
|----------------------------------------------------------------------------------------------------------------------------------------------------------------------------------|------|
| <b>Figure S1.</b> NOE correlations                                                                                                                                               | S-4  |
| <b>Figure S2.</b> Single-crystal X-ray structure                                                                                                                                 | S-5  |
| <b>Figure S3.</b> <sup>1</sup> H-NMR spectra of malonamide <b>17a</b>                                                                                                            | S-6  |
| <b>Figure S4.</b> <sup>1</sup> H-NMR spectra of tetramate <b>18a</b>                                                                                                             | S-6  |
| <b>Figure S5.</b> <sup>1</sup> H-NMR spectrum of 2,4- <i>cis</i> imidazolidine <b>20a</b>                                                                                        | S-7  |
| <b>Figure S6:</b> <sup>1</sup> H-NMR spectrum of malonamides.                                                                                                                    | S-8  |
| <b>Figure S7:</b> <sup>1</sup> H-NMR spectrum of tetramate <b>22a</b>                                                                                                            | S-9  |
| <b>Figure S8:</b> <sup>1</sup> H-NMR spectrum of products post-chromatographic purification and 10% citric acid (aq.) wash                                                       | S-10 |
| <b>Figure S9:</b> <sup>1</sup> H-NMR spectrum of malonamide <b>26</b> .                                                                                                          | S-11 |
| <b>Table S1.</b> Chemical shift values for H-2 and relative population of ring-chain tautomers.                                                                                  | S-11 |
| <b>Table S2:</b> Key chemical shifts ( $\delta$ ), coupling constants ( $J$ ) and diastereomeric ratio (dr) of 2,5- <i>cis/trans</i> malonamide diastereomers <b>16a-d/17a-d</b> | S-11 |
| <b>Table S3:</b> Key chemical shifts ( $\delta$ ), coupling constants ( $J$ ) and yields of tetramates <b>18a-d</b>                                                              | S-12 |
| <b>Table S4:</b> Key chemical shifts, coupling constants, diastereomeric ratio (dr) and yields of imidazolidines <b>20a-l</b>                                                    | S-12 |
| <b>Table S5:</b> Key chemical shifts, coupling constants and yields of malonamides <b>21a-l</b>                                                                                  | S-13 |
| <b>Table S6:</b> Key chemical shifts, coupling constants and yields of tetramates <b>22a-l</b>                                                                                   | S-13 |
| <b>Table S7:</b> Cartesian coordinates with the associated energies of optimized structures                                                                                      | S-22 |
| <b>Table S8:</b> Physicochemical Properties and MIC values                                                                                                                       | S-23 |

|                                  |      |
|----------------------------------|------|
| Experimental procedures and data | S-24 |
| References                       | S-62 |
| NMR Spectra                      | S-63 |

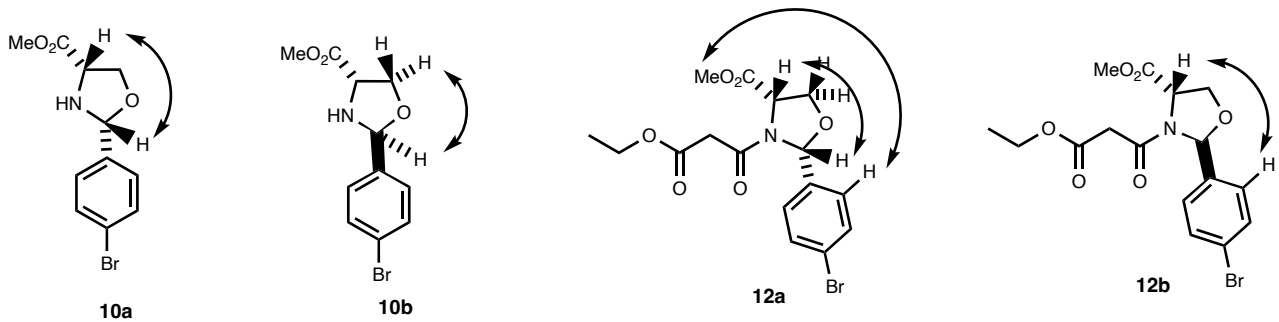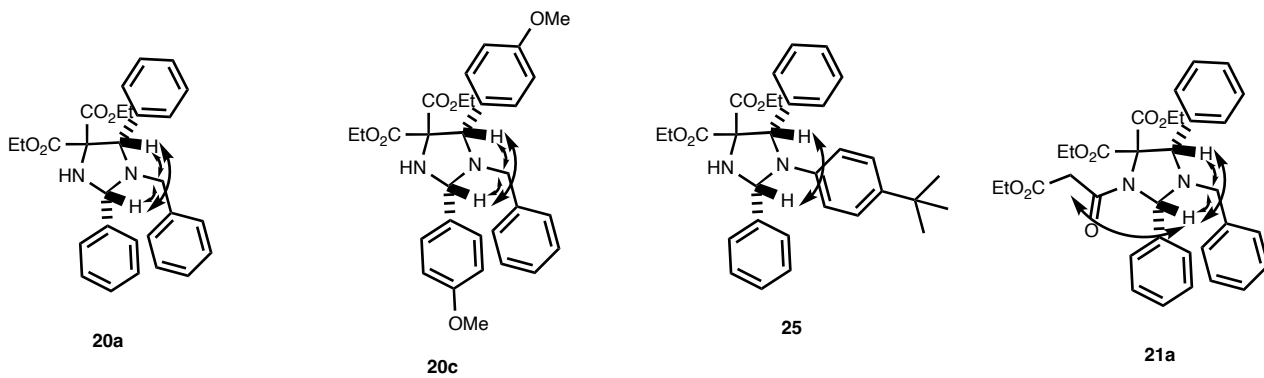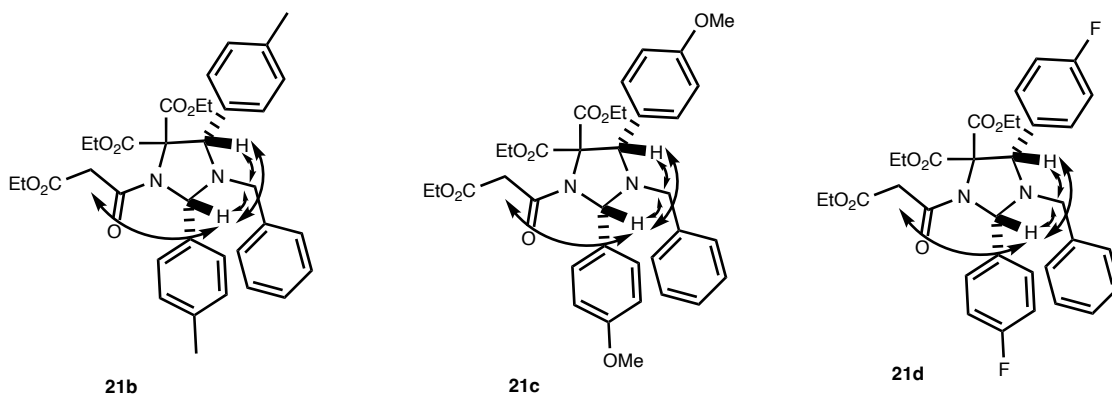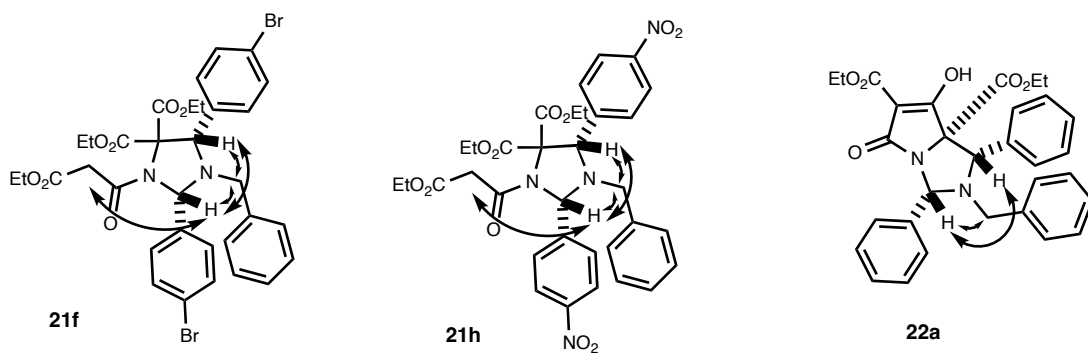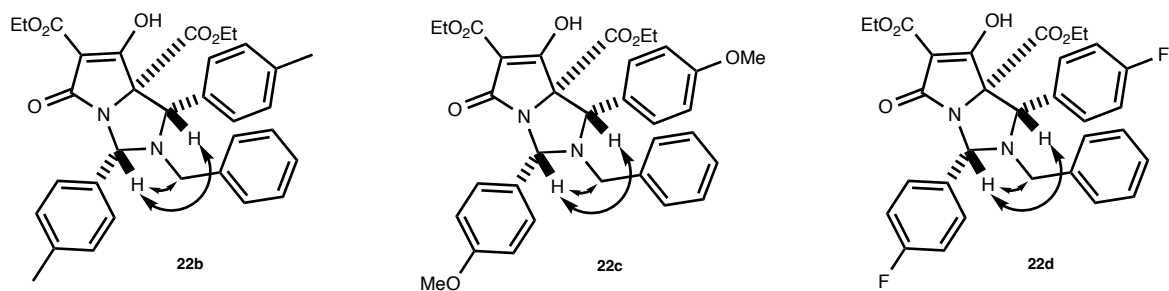

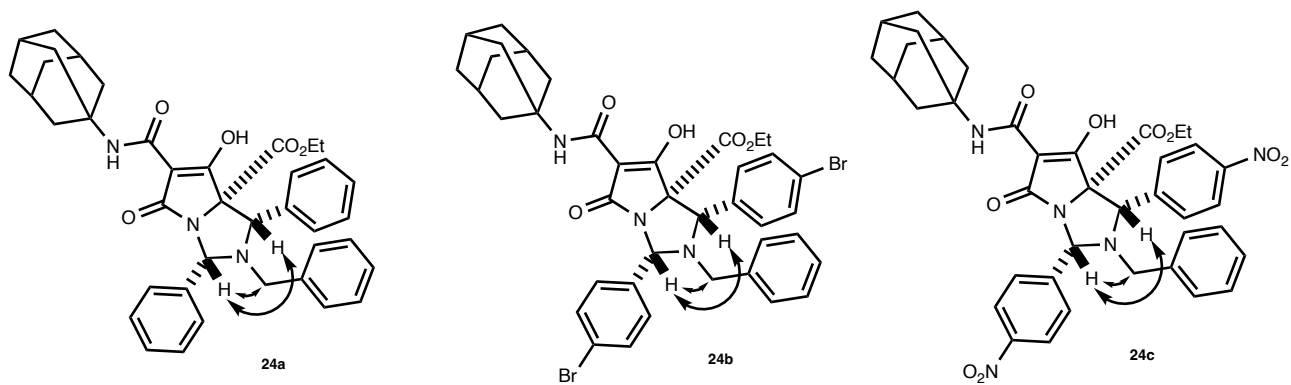

**Figure S1:** Relative stereochemistry assigned by nOe studies.

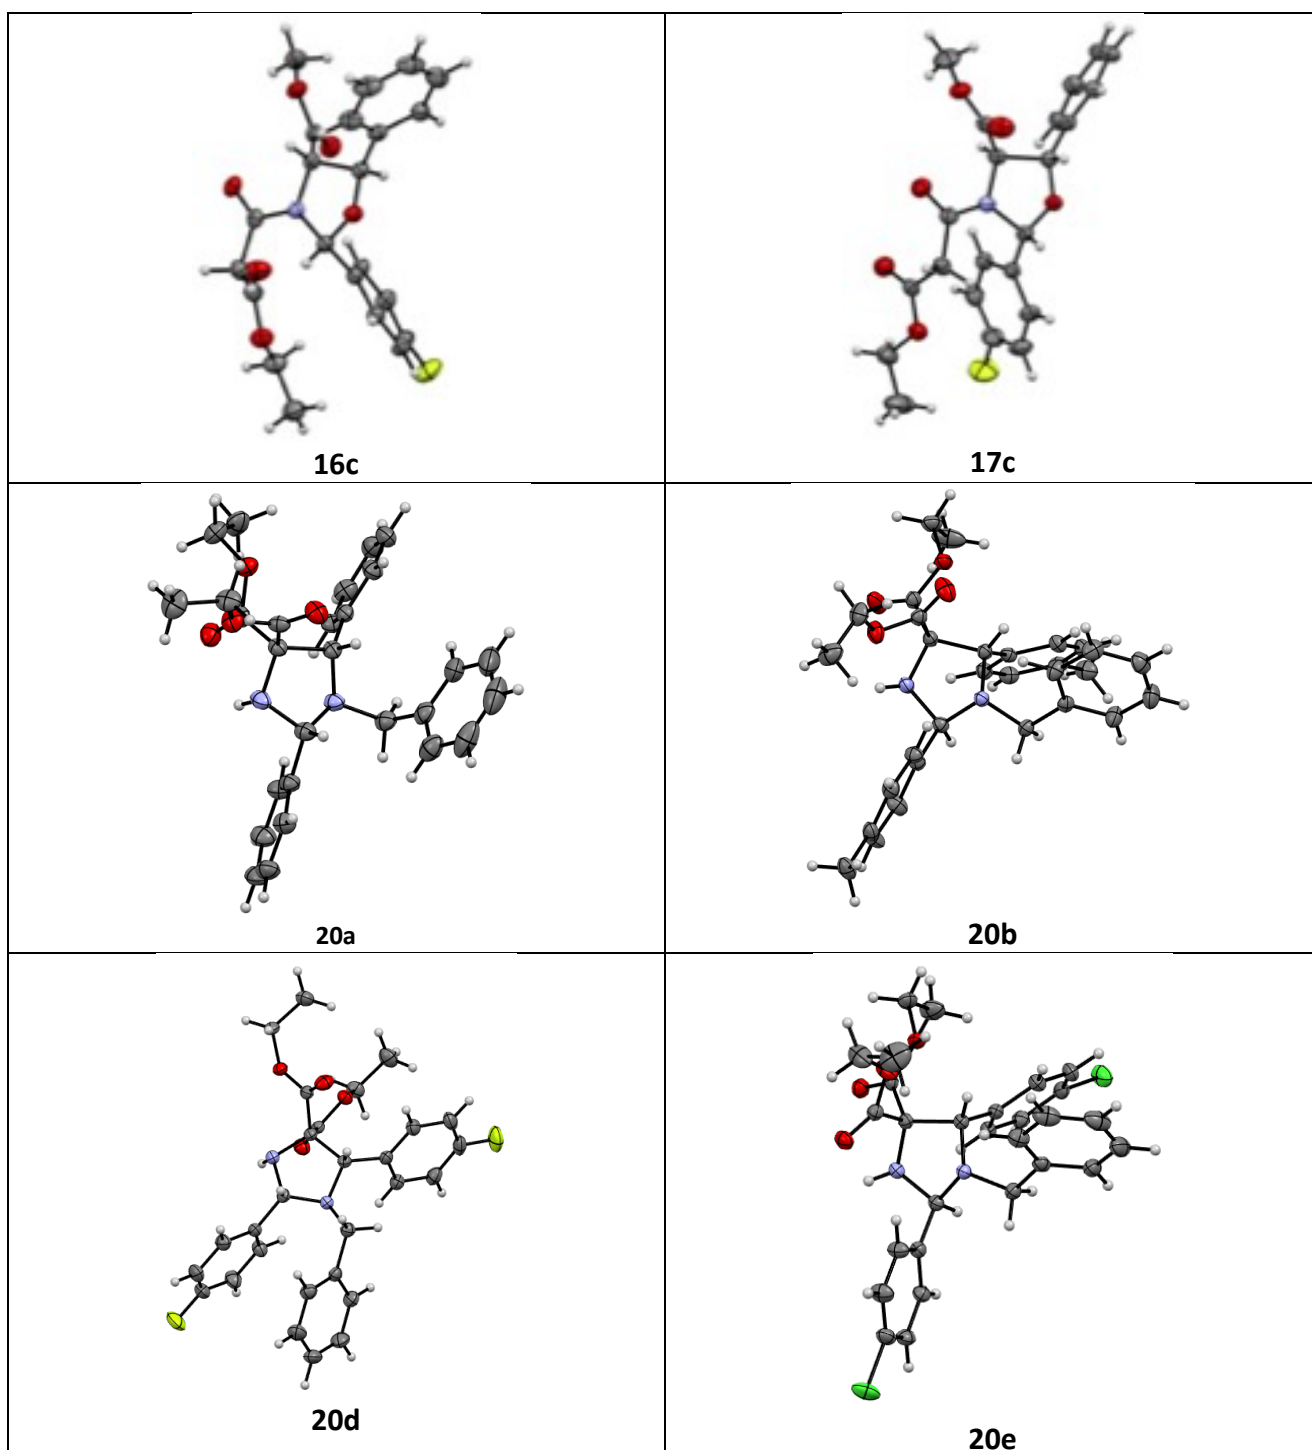

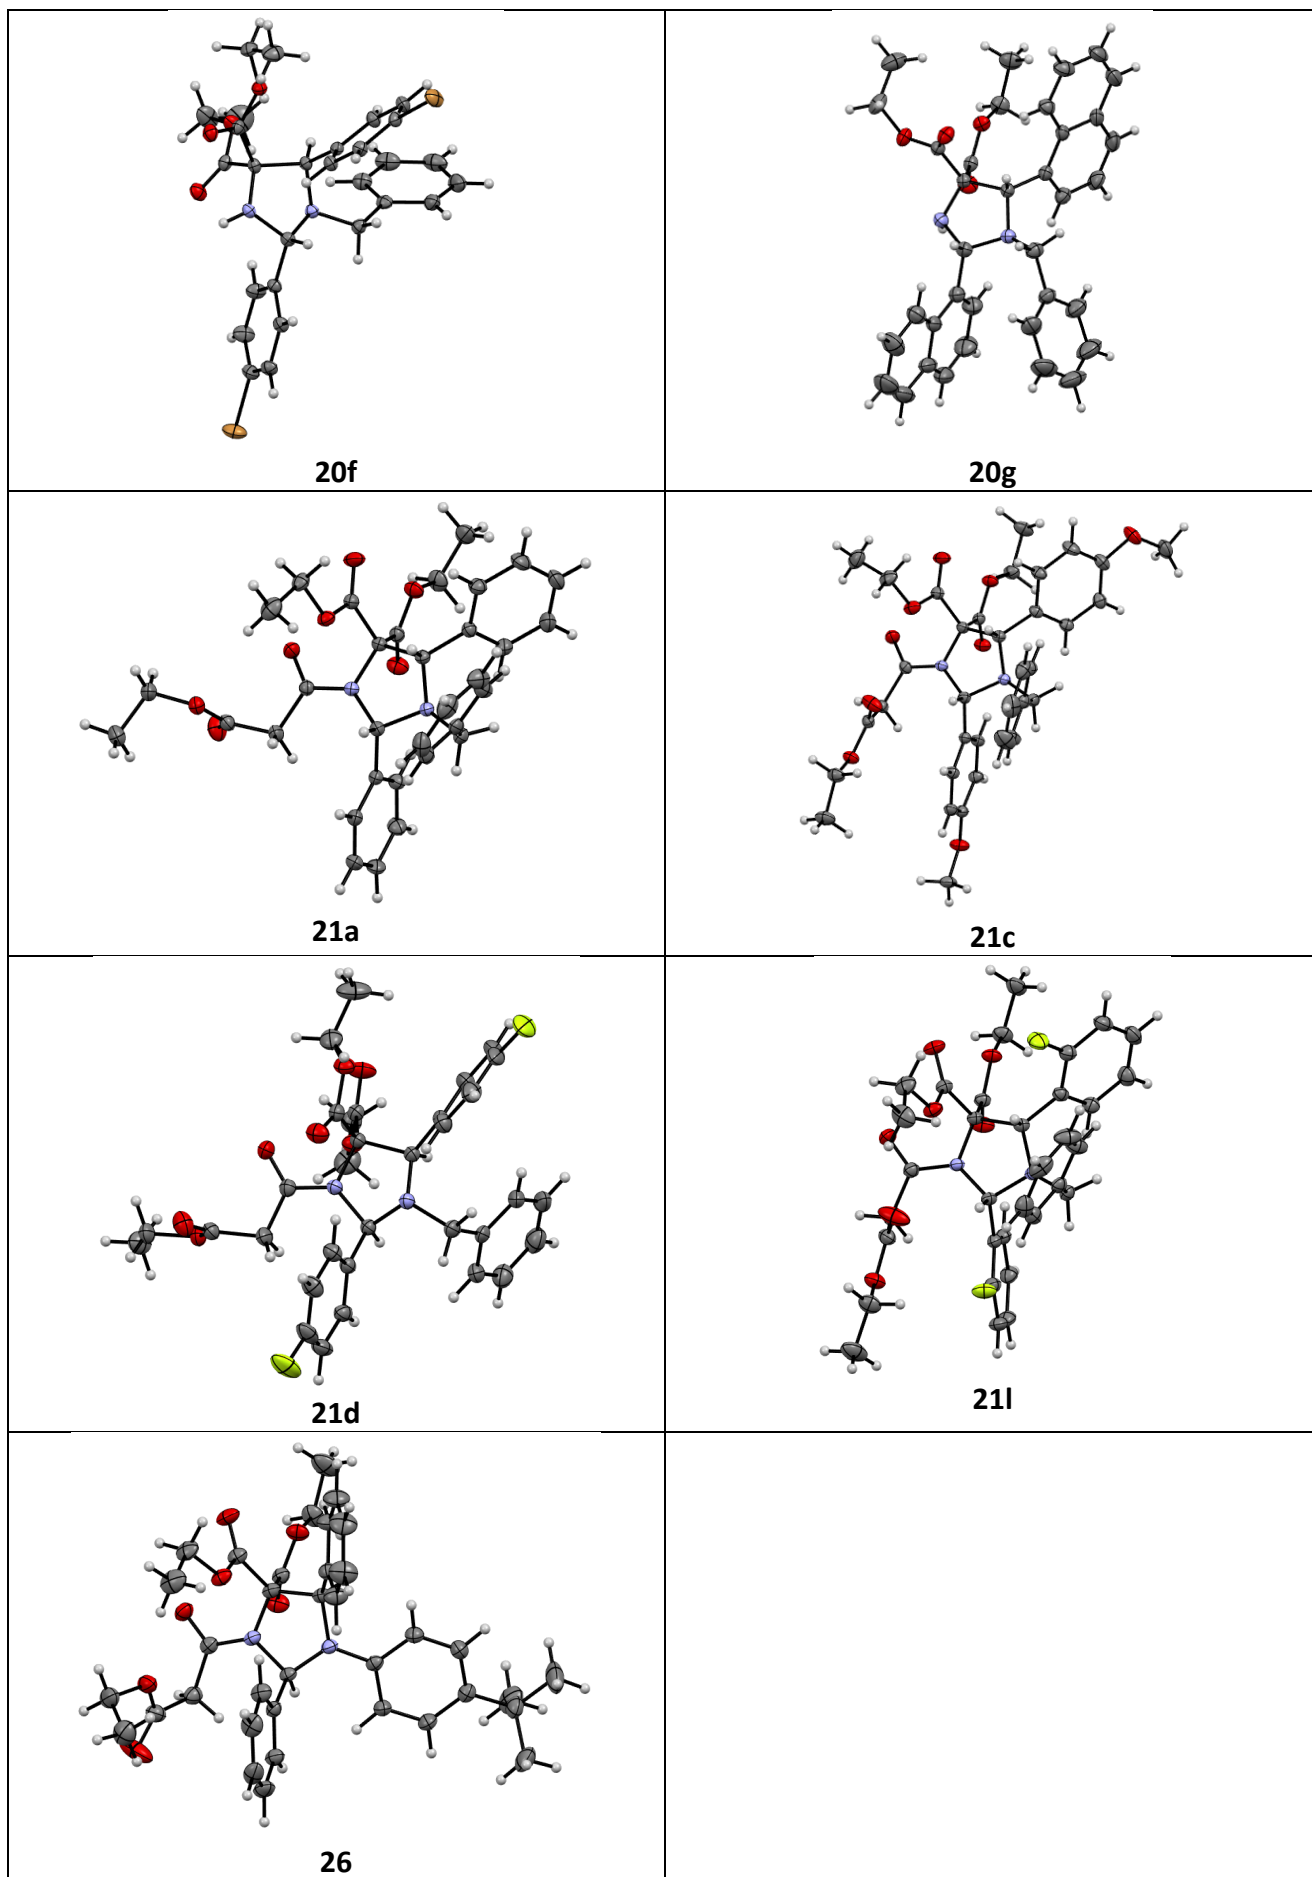

**Figure S2:** Single-crystal X-ray structures.

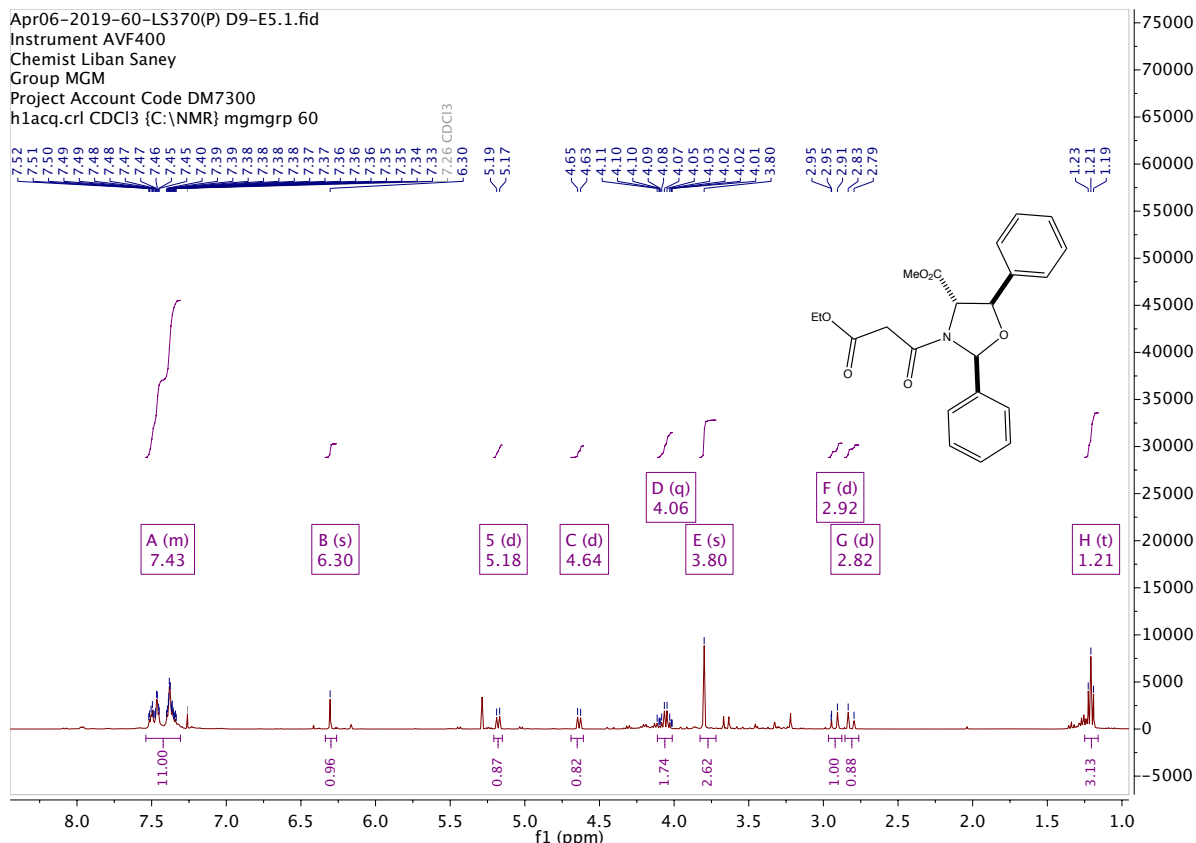

**Figure S3:**  $^1\text{H-NMR}$  spectrum of malonamide **17a** at room temperature;  $\text{CDCl}_3$  solvent, 400 MHz.

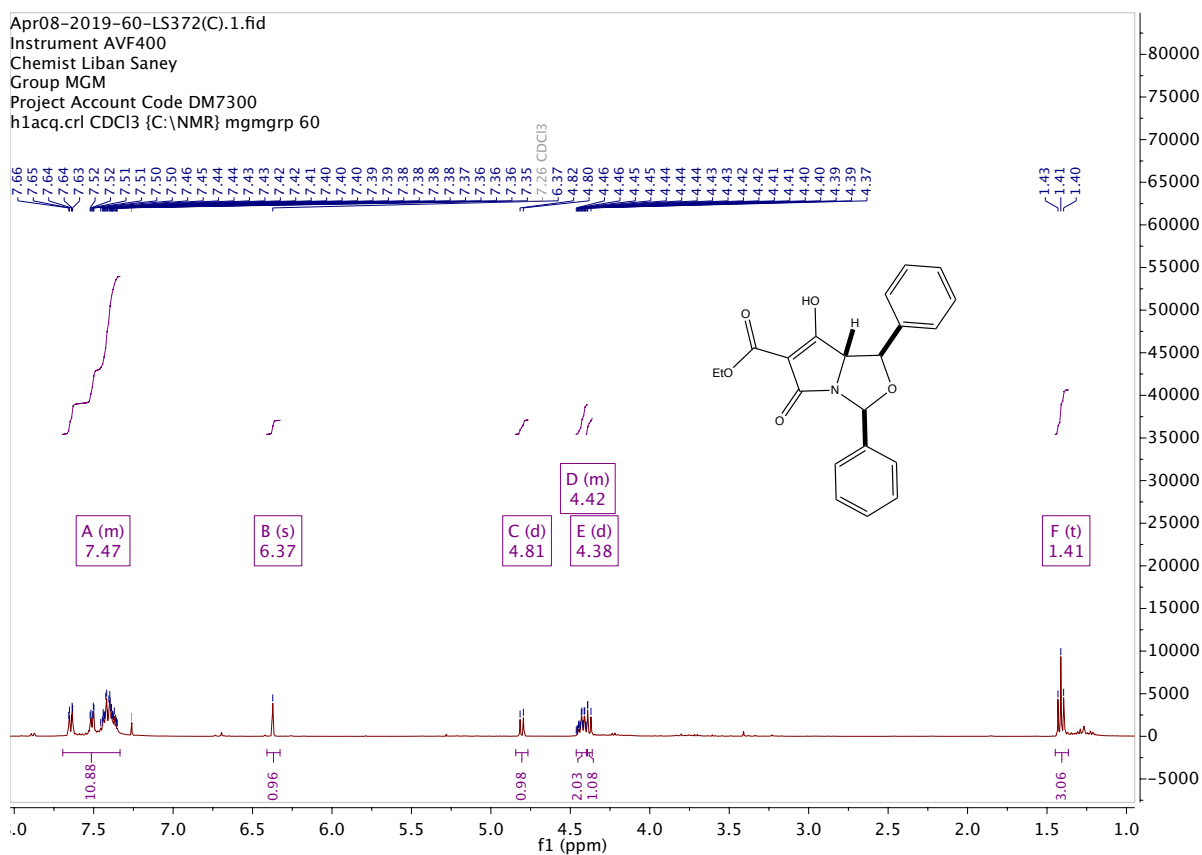

**Figure S4:**  $^1\text{H-NMR}$  spectrum of tetramate **18a**, showing the relative purity of the crude material;  $\text{CDCl}_3$  solvent, 400 MHz.

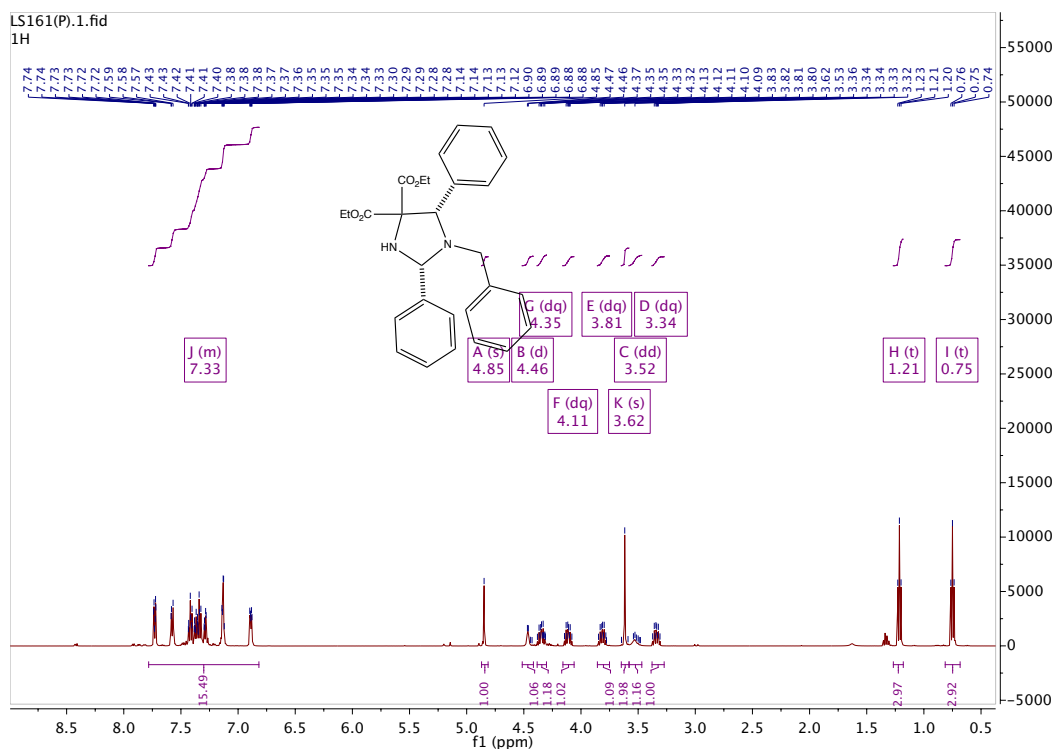

**Figure S5:**  $^1\text{H-NMR}$  spectrum of 2,4-*cis* imidazolidine **20a**, showing the distinct diastereotopic methylene protons of the ethyl esters;  $\text{CDCl}_3$  solution, 500 MHz.

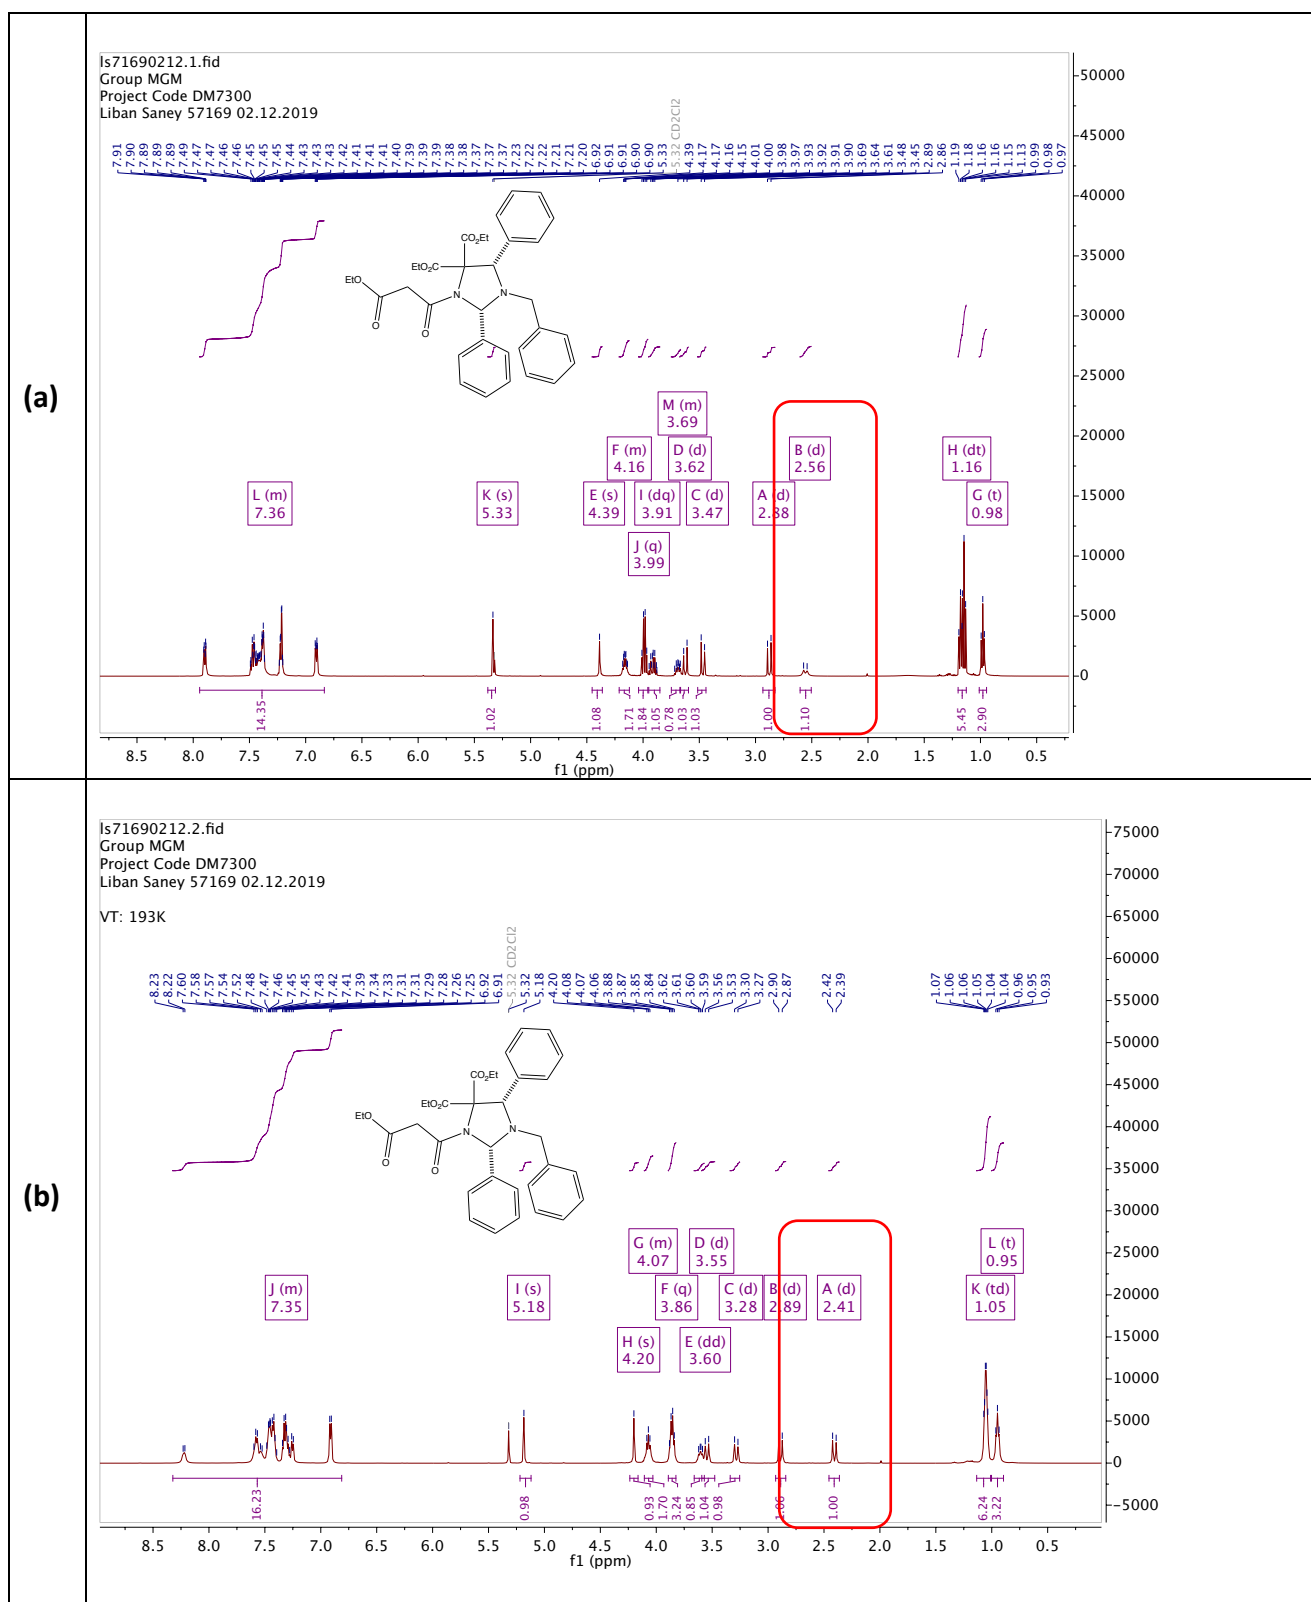

**Figure S6: (a)**  $^1\text{H}$ -NMR spectrum of malonamide **21a** at room temperature; **(b)**  $^1\text{H}$ -NMR spectrum of malonamide **21a** at 193K; with the red rectangle highlighting the diastereotopic H7-methylene protons of interest;  $\text{CD}_2\text{Cl}_2$  solvent, 500 MHz.





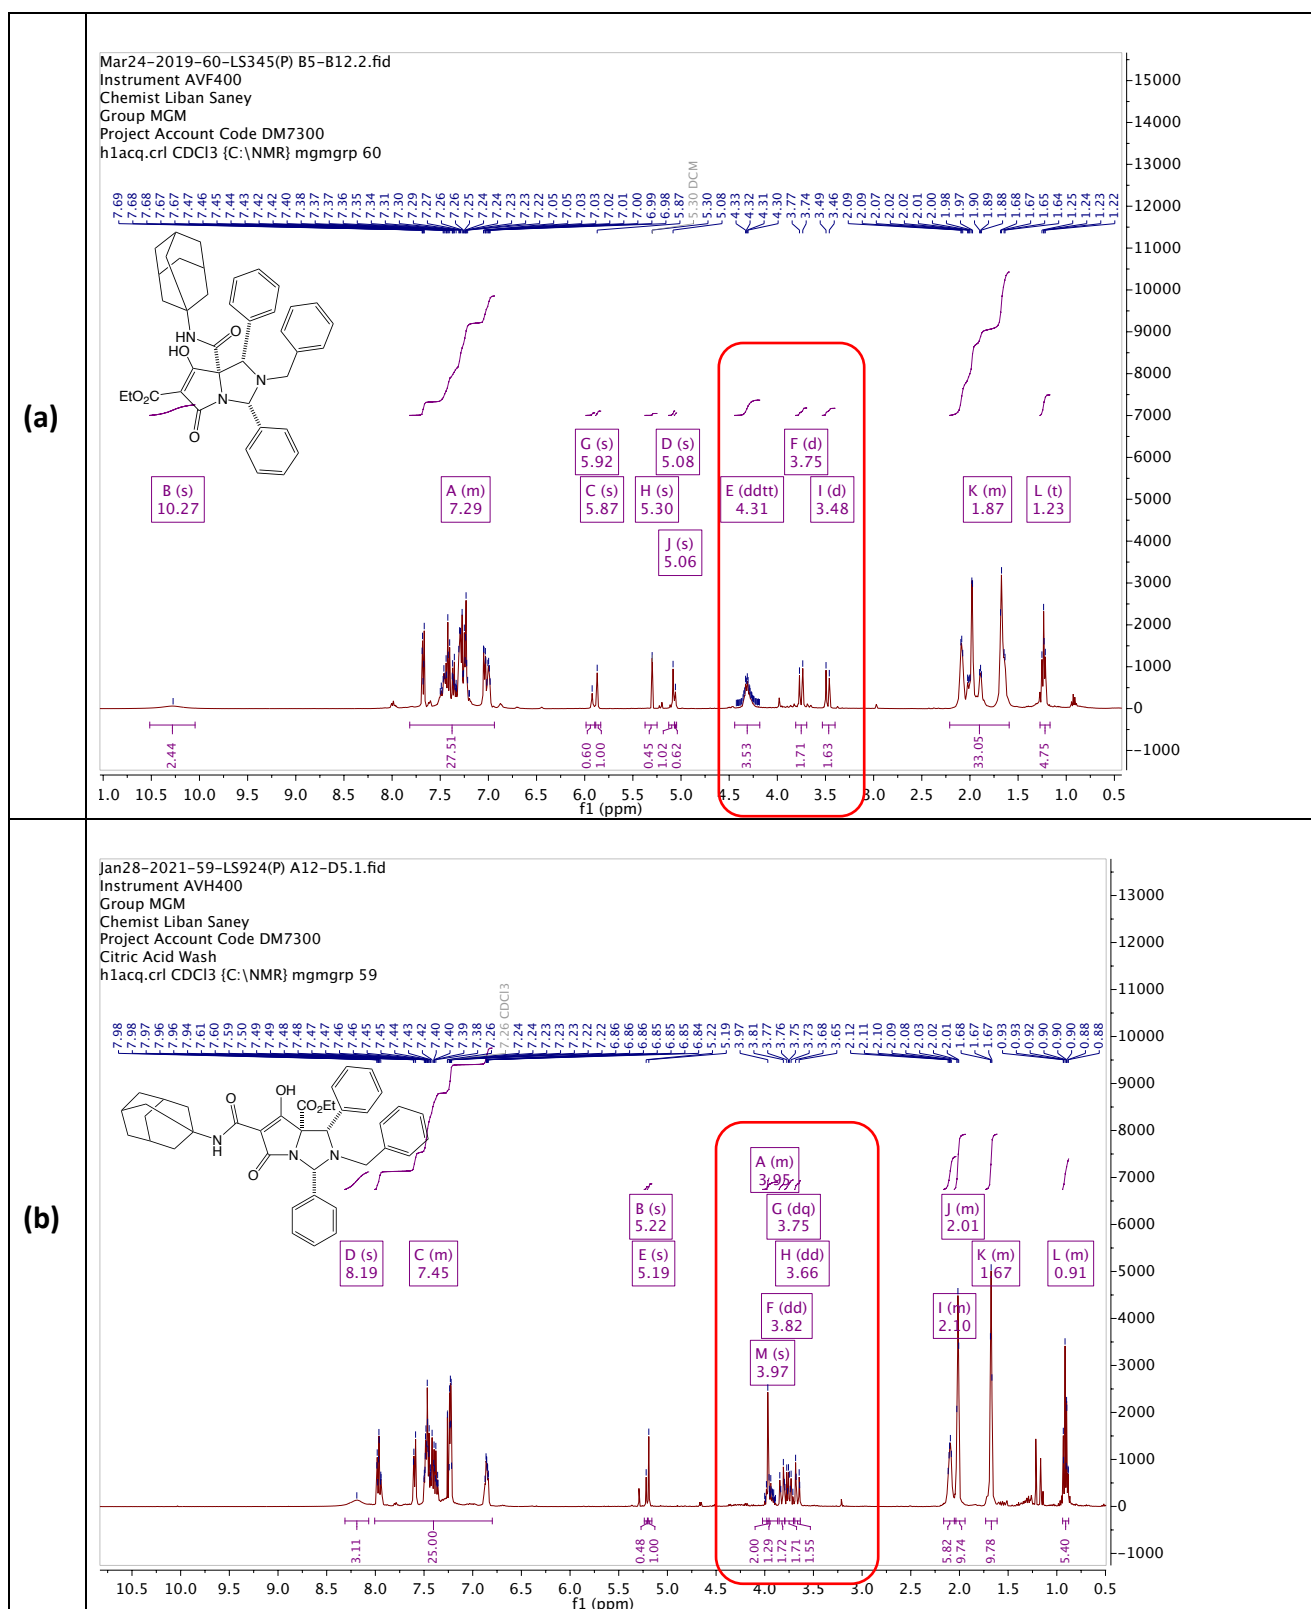

**Figure S8:**  $^1\text{H-NMR}$  spectrum post-chromatographic purification after 10% citric acid (aq.) wash; with **(a)** showing the  $^1\text{H-NMR}$  spectrum of C5-carboxamide **23a** and **(b)** showing the  $^1\text{H-NMR}$  spectrum of C7-carboxamide **24a**; with the red rectangle highlighting the area of interest within the  $^1\text{H-NMR}$  spectrum, showing the differences between the two carboxamide products;  $\text{CDCl}_3$  solvent, 400 MHz.

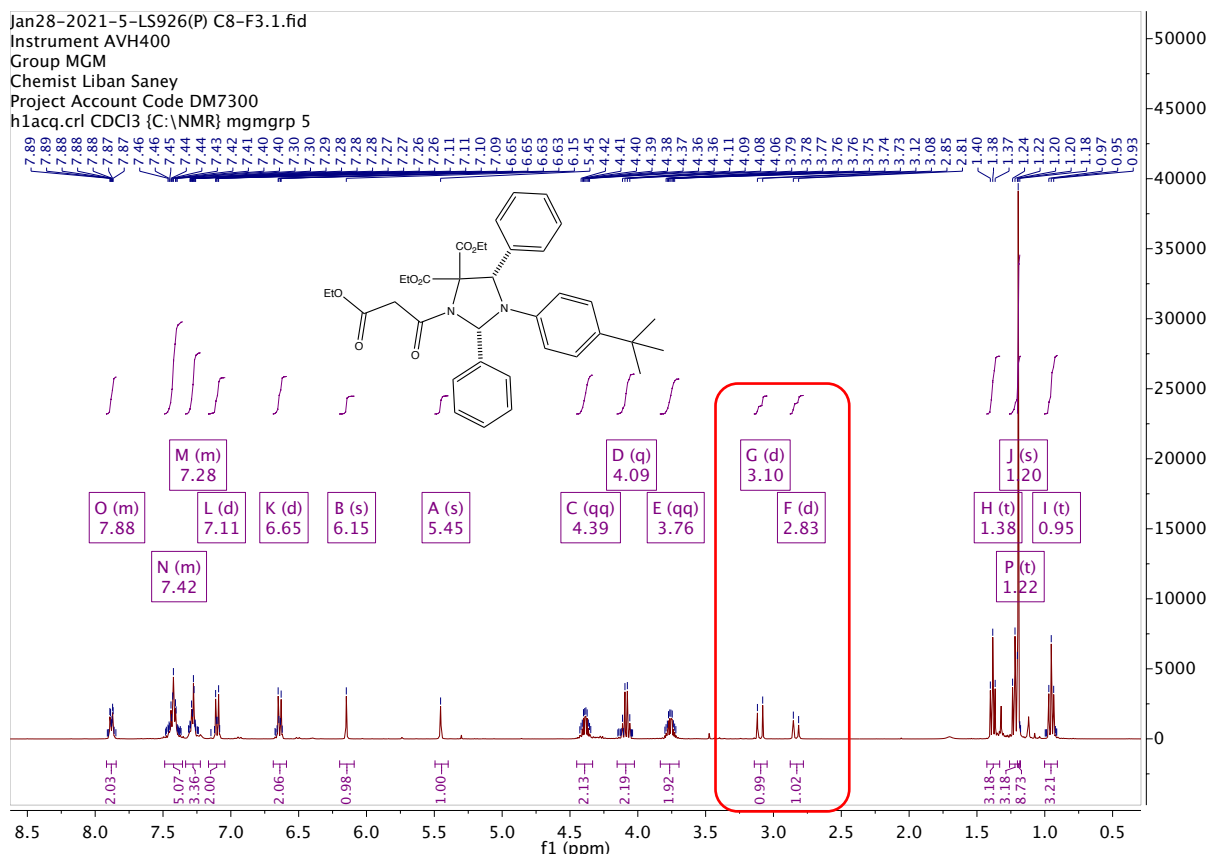

**Figure S9:**  $^1\text{H-NMR}$  spectrum of malonamide **26** at room temperature; with the red rectangle highlighting the diastereotopic H7-methylene protons of interest;  $\text{CDCl}_3$  solvent, 400 MHz.

| Compound No. | Structure Ar = | $\delta_{\text{H}}$ for H-2 (ppm) |               |           | 10a:11:10b ratio |
|--------------|----------------|-----------------------------------|---------------|-----------|------------------|
|              |                | Cis 10a                           | open chain 11 | trans 10a |                  |
| 10a,b, 11    |                | 5.27                              | 8.28          | 5.64      | 1.2:3.3:1        |

**Table S1.** Chemical shift values for H-2 and relative population of ring-chain tautomers.

| Compound | 2,5-cis diastereomer $\delta$ (ppm) <sup>a</sup> |      |      |                    | Compound | 2,5-trans diastereomer $\delta$ (ppm) |      |      |                    | dr between 2,5-cis/trans <sup>b</sup> | Yield (%) <sup>c</sup> |
|----------|--------------------------------------------------|------|------|--------------------|----------|---------------------------------------|------|------|--------------------|---------------------------------------|------------------------|
|          | H2                                               | H4   | H5   | $J_{\text{H4-H5}}$ |          | H2                                    | H4   | H5   | $J_{\text{H4-H5}}$ |                                       |                        |
| 16a      | 6.38                                             | 5.25 | 4.81 | 6.3                | 17a      | 6.30                                  | 5.18 | 4.64 | 8.1                | 1.6:1                                 | 14                     |
| 16b      | 6.35                                             | 5.27 | 4.81 | 6.2                | 17b      | 6.28                                  | 5.17 | 4.63 | 8.2                | 1.1:1                                 | 43                     |
| 16c      | 6.37                                             | 5.24 | 4.82 | 6.2                | 17c      | 6.32                                  | 5.18 | 4.65 | 8.0                | 1.1:1                                 | 49                     |
| 16d      | 6.36                                             | 5.20 | 4.80 | 6.5                | 17d      | 6.29                                  | 5.18 | 4.64 | 8.0                | 1.6:1                                 | 25                     |

**Table S2:** Key chemical shifts ( $\delta$ ), coupling constants ( $J$ ) and diastereomeric ratio (dr) of 2,5-cis/trans malonamide diastereomers **16a-d/17a-d**;  $\text{CDCl}_3$  solvent, 400 MHz; <sup>a</sup> Shown is the  $^1\text{H-NMR}$  data for the major malonamide rotamer; <sup>b</sup> Determined from  $^1\text{H-NMR}$  studies of the crude material; <sup>c</sup> Yield includes both diastereomers over two steps from starting amino ester.

| Compound   | R <sup>1</sup> | $\delta$ (ppm) |      |      |                  | Yield (%) |
|------------|----------------|----------------|------|------|------------------|-----------|
|            |                | H2             | H4   | H5   | $J_{H4-H5}$ (Hz) |           |
| <b>18a</b> | H              | 6.37           | 4.81 | 4.38 | 8.4              | 37        |
| <b>18b</b> | Me             | 6.35           | 4.80 | 4.38 | 8.4              | 55        |
| <b>18c</b> | F              | 6.32           | 4.80 | 4.37 | 8.4              | 64        |
| <b>18d</b> | Br             | 6.30           | 4.80 | 4.35 | 8.4              | 62        |

**Table S3:** Key chemical shifts ( $\delta$ ), coupling constants ( $J$ ) and yields of tetramates **18a-d**; CDCl<sub>3</sub> solvent, 400 MHz.

| Compound   | R <sup>1</sup>                            | 2,4- <i>cis</i> diastereomer $\delta$ (ppm) |      |      |                  |                  | 2,4- <i>trans</i> diastereomer $\delta$ (ppm) |      |      |      |             | dr between 2,4- <i>cis/trans</i> <sup>a</sup> | Yield (%) <sup>b</sup> |
|------------|-------------------------------------------|---------------------------------------------|------|------|------------------|------------------|-----------------------------------------------|------|------|------|-------------|-----------------------------------------------|------------------------|
|            |                                           | H2                                          | H4   | H6   | H6               | $J_{H6-H6}$      | H2                                            | H4   | H6   | H6   | $J_{H6-H6}$ |                                               |                        |
| <b>20a</b> | <i>p</i> -H                               | 4.46                                        | 4.85 | 3.62 | n.d <sup>c</sup> | n.d <sub>c</sub> | 5.19                                          | 5.14 | 2.98 | 3.50 | 14.2        | 2.3:1                                         | 65                     |
| <b>20b</b> | <i>p</i> -Me                              | 4.41                                        | 4.76 | 3.58 | n.d <sup>c</sup> | n.d <sub>c</sub> | 5.10                                          | 5.07 | 2.95 | 3.46 | 14.2        | 1:1.9                                         | 58                     |
| <b>20c</b> | <i>p</i> -OMe                             | 4.38                                        | 4.74 | 3.56 | n.d <sup>c</sup> | n.d <sub>c</sub> | -                                             | -    | -    | -    | -           | >94:6                                         | 70 <sup>d</sup>        |
| <b>20d</b> | <i>p</i> -F                               | 4.42                                        | 4.80 | 3.53 | 3.54             | 14.0             | 5.12                                          | 5.09 | 2.92 | 3.45 | 14.2        | 2.9:1                                         | Quant.                 |
| <b>20e</b> | <i>p</i> -Cl                              | 4.42                                        | 4.79 | 3.53 | 3.57             | 14.0             | 5.11                                          | 5.08 | 2.93 | 3.46 | 14.2        | 1:2.3                                         | Quant.                 |
| <b>20f</b> | <i>p</i> -Br                              | 4.42                                        | 4.78 | 3.53 | 3.58             | 14.0             | 5.10                                          | 5.07 | 2.94 | 3.46 | 14.3        | 1:2.6                                         | 96                     |
| <b>20g</b> | <i>o,m</i> -C <sub>4</sub> H <sub>4</sub> | 5.42                                        | 5.98 | 3.79 | 3.82             | 13.8             | 6.22                                          | 6.42 | 3.31 | 3.74 | 14.1        | 1:3                                           | 62                     |
| <b>20h</b> | <i>p</i> -NO <sub>2</sub>                 | 4.62                                        | 4.97 | 3.55 | 3.59             | 13.6             | 5.33                                          | 5.25 | 2.95 | 3.48 | 14.3        | 1:1.1                                         | 83                     |
| <b>20i</b> | <i>p</i> -CF <sub>3</sub>                 | 4.55                                        | 4.92 | 3.55 | 3.61             | 13.8             | 5.27                                          | 5.21 | 2.96 | 3.51 | 14.3        | 1:2.4                                         | 80                     |
| <b>20j</b> | <i>p</i> -CN                              | 4.54                                        | 4.90 | 3.52 | 3.58             | 13.6             | 5.25                                          | 5.18 | 2.93 | 3.49 | 14.2        | 1.9:1                                         | 77                     |
| <b>20k</b> | <i>m</i> -Br                              | 4.34                                        | 4.77 | 3.60 | n.d <sub>c</sub> | n.d <sub>c</sub> | 5.13                                          | 5.05 | 2.98 | 3.52 | 14.1        | 1:2.2                                         | 69                     |
| <b>20l</b> | <i>o</i> -F                               | 4.92                                        | 5.30 | 3.63 | n.d <sub>c</sub> | n.d <sub>c</sub> | -                                             | -    | -    | -    | -           | >19:1                                         | 78 <sup>d</sup>        |

**Table S4:** Key chemical shifts, coupling constants, diastereomeric ratio (dr) and yields of imidazolidines **20a-l**; CDCl<sub>3</sub> solvent, 400 MHz; <sup>a</sup> Determined from <sup>1</sup>H-NMR studies of the crude material; <sup>b</sup> Yields include both diastereomers, however, at times, it was also contaminated with the imine side-product and aldehyde starting material; <sup>c</sup> n.d = not detected as the methylene benzyl protons were not diastereotopic; <sup>d</sup> Yield is only for a single diastereomer.

| Compound   | R <sup>1</sup>                            | $\delta$ (ppm) |      |      |                  |                  |      |                  |                  | Yield (%) |
|------------|-------------------------------------------|----------------|------|------|------------------|------------------|------|------------------|------------------|-----------|
|            |                                           | H2             | H4   | H6   | H6               | $J_{H6-H6}$      | H7   | H7               | $J_{H7-H7}$      |           |
| <b>21a</b> | <i>p</i> -H                               | 5.37           | 4.42 | 3.63 | 3.49             | 14.9             | 2.89 | 2.64             | 15.7             | 84        |
| <b>21b</b> | <i>p</i> -Me                              | 5.29           | 4.34 | 3.63 | 3.46             | 14.9             | 2.91 | 2.63             | 15.7             | 67        |
| <b>21c</b> | <i>p</i> -OMe                             | 5.28           | 4.31 | 3.61 | 3.46             | 14.8             | 2.91 | 2.64             | 15.7             | 56        |
| <b>21d</b> | <i>p</i> -F                               | 5.36           | 4.39 | 3.58 | 3.49             | 14.8             | 2.87 | 2.68             | 15.7             | 77        |
| <b>21e</b> | <i>p</i> -Cl                              | 5.34           | 4.38 | 3.57 | 3.47             | 14.8             | 2.88 | 2.70             | 15.6             | 70        |
| <b>21f</b> | <i>p</i> -Br                              | 5.34           | 4.38 | 3.57 | 3.49             | 14.8             | 2.89 | 2.72             | 15.6             | 76        |
| <b>21g</b> | <i>o,m</i> -C <sub>4</sub> H <sub>4</sub> | 6.50           | 5.55 | 3.67 | 3.47             | 14.9             | 2.86 | 2.55             | 15.8             | 85        |
| <b>21h</b> | <i>p</i> -NO <sub>2</sub>                 | 5.55           | 4.64 | 3.59 | n.d <sup>a</sup> | n.d <sup>a</sup> | 2.84 | n.d <sup>b</sup> | n.d <sup>b</sup> | Quant.    |
| <b>21i</b> | <i>p</i> -CF <sub>3</sub>                 | 5.46           | 4.54 | 3.58 | 3.53             | 14.7             | 2.87 | 2.71             | 15.4             | 66        |
| <b>21j</b> | <i>p</i> -CN                              | 5.45           | 4.53 | 3.56 | 3.51             | 14.7             | 2.83 | 2.72             | 15.0             | 69        |
| <b>21k</b> | <i>m</i> -Br                              | 5.32           | 4.38 | 3.60 | 3.53             | 14.7             | 2.88 | 2.74             | 15.7             | 85        |
| <b>21l</b> | <i>o</i> -F                               | 5.89           | 4.85 | 3.58 | n.d <sup>a</sup> | n.d <sup>a</sup> | 3.04 | 2.72             | 15.8             | 79        |

**Table S5:** Key chemical shifts, coupling constants and yields of malonamides **21a-l**; CDCl<sub>3</sub> solvent, 400 MHz; <sup>a</sup> not detected as the benzyl methylene protons were not diastereotopic; <sup>b</sup> not determined due to a broad multiplet peak.

| Compound   | R <sup>1</sup>                            | $\delta$ (ppm) |      |      |                  |                  | Yield (%) |
|------------|-------------------------------------------|----------------|------|------|------------------|------------------|-----------|
|            |                                           | H2             | H4   | H9   | H9               | $J_{H9-H9}$      |           |
| <b>22a</b> | <i>p</i> -H                               | 5.30           | 3.96 | 3.84 | 3.70             | 14.8             | 77        |
| <b>22b</b> | <i>p</i> -Me                              | 5.25           | 3.90 | 3.85 | 3.69             | 14.7             | 75        |
| <b>22c</b> | <i>p</i> -OMe                             | 5.20           | 3.88 | 3.80 | 3.66             | 14.8             | 78        |
| <b>22d</b> | <i>p</i> -F                               | 5.26           | 3.93 | 3.77 | 3.67             | 14.6             | 77        |
| <b>22e</b> | <i>p</i> -Cl                              | 5.27           | 3.92 | 3.77 | 3.66             | 14.8             | 75        |
| <b>22f</b> | <i>p</i> -Br                              | 5.25           | 3.91 | 3.77 | 3.67             | 14.6             | 55        |
| <b>22g</b> | <i>o,m</i> -C <sub>4</sub> H <sub>4</sub> | 6.25           | 4.91 | 3.81 | 3.52             | 14.7             | 61        |
| <b>22h</b> | <i>p</i> -NO <sub>2</sub>                 | 5.48           | 4.15 | 3.75 | n.d <sup>a</sup> | n.d <sup>a</sup> | 83        |
| <b>22i</b> | <i>p</i> -CF <sub>3</sub>                 | -              | -    | -    | -                | -                | 0         |
| <b>22j</b> | <i>p</i> -CN                              | 5.39           | 4.05 | 3.72 | n.d <sup>a</sup> | n.d <sup>a</sup> | 85        |
| <b>22k</b> | <i>m</i> -Br                              | 5.18           | 3.84 | 3.71 | 3.63             | 14.7             | 70        |
| <b>22l</b> | <i>o</i> -F                               | -              | -    | -    | -                | -                | 0         |

**Table S6:** Key chemical shifts, coupling constants and yields of tetramates **22a-l**; CDCl<sub>3</sub> solvent, 400 MHz; <sup>a</sup> n.d = not determined as the benzyl methylene protons were not diastereotopic.

**21a**

|   |             |             |             |
|---|-------------|-------------|-------------|
| C | 0.48704400  | 1.00159000  | -0.02972200 |
| N | 0.62000900  | -0.44173700 | -0.23019600 |
| C | -0.54282100 | -0.96858000 | -0.97365900 |
| N | -1.58915200 | 0.07499600  | -0.83107200 |
| C | -0.77320700 | 1.29064900  | -0.95658100 |
| C | 1.89934900  | -1.10110500 | -0.52958300 |
| C | 2.97707000  | -0.65682300 | 0.27466800  |
| O | 1.85669300  | -1.97144800 | -1.40920700 |
| C | 4.35932800  | -0.94419700 | 0.12648500  |
| O | 5.27065500  | -0.48910400 | 0.84103600  |
| C | -2.39183200 | 0.00676100  | 0.40364500  |
| C | 0.26879600  | 1.39609100  | 1.45056900  |
| O | -0.10353500 | 2.48886800  | 1.82930000  |
| O | 0.52736300  | 0.38551200  | 2.30541800  |
| C | 0.85753600  | -0.51832500 | 4.48400600  |
| C | 0.43123000  | 0.71237800  | 3.70423900  |
| C | -1.52783700 | 2.61167700  | -0.94235800 |
| C | -0.89918700 | 3.83106900  | -0.64847700 |
| C | -1.58021500 | 5.03973800  | -0.78874300 |
| C | -2.90586300 | 5.06269000  | -1.22482300 |
| C | -3.54113100 | 3.85866000  | -1.52580300 |
| C | -2.85616800 | 2.64964200  | -1.39346300 |
| C | -0.97128900 | -2.35606900 | -0.52318600 |
| C | -1.73400100 | -3.15126600 | -1.38586200 |
| C | -2.16197900 | -4.42078700 | -0.99946300 |
| C | -1.82441900 | -4.91817100 | 0.26076200  |
| C | -1.05114500 | -4.13780800 | 1.12192000  |
| C | -0.62571000 | -2.86686800 | 0.73258500  |
| O | 4.68096900  | -1.79317100 | -0.92011600 |
| C | 6.20988200  | -2.97855000 | -2.28622700 |
| C | 6.06803800  | -2.04076100 | -1.09567200 |
| C | -3.76886100 | -0.61812900 | 0.22347800  |
| C | -4.51915800 | -0.94930600 | 1.36024600  |
| C | -5.80918400 | -1.46549600 | 1.24597100  |
| C | -6.37496000 | -1.66503000 | -0.01577800 |
| C | -5.63411200 | -1.34629400 | -1.15405800 |
| C | -4.34250700 | -0.82817200 | -1.03433900 |
| C | 1.70023100  | 1.77397200  | -0.62177900 |
| O | 1.90757100  | 1.84208800  | -1.81396200 |
| O | 2.42599300  | 2.40584600  | 0.31719000  |
| C | 4.66549500  | 2.86488600  | 1.04851300  |
| C | 3.68692200  | 2.98054500  | -0.10668300 |
| H | -0.29536300 | -1.03292500 | -2.04090900 |
| H | -0.31480900 | 1.22981600  | -1.95273000 |
| H | 2.75665700  | -0.03508200 | 1.13041900  |
| H | -2.54075000 | 1.03146500  | 0.76313600  |
| H | -1.86464900 | -0.52263400 | 1.20752400  |
| H | 0.82221800  | -0.31090500 | 5.56013900  |
| H | 0.19468200  | -1.36396100 | 4.27260500  |

|   |             |             |             |
|---|-------------|-------------|-------------|
| H | 1.87772000  | -0.80862800 | 4.21535900  |
| H | 1.07548600  | 1.57320100  | 3.91134200  |
| H | -0.59865800 | 1.01056300  | 3.93207200  |
| H | 0.11831400  | 3.84179800  | -0.28012000 |
| H | -1.06898100 | 5.96862700  | -0.54706300 |
| H | -3.43562200 | 6.00703400  | -1.32774200 |
| H | -4.57315700 | 3.85374900  | -1.86938400 |
| H | -3.35615900 | 1.72136400  | -1.64576600 |
| H | -1.98681100 | -2.77158500 | -2.37309400 |
| H | -2.75427600 | -5.02377100 | -1.68416200 |
| H | -2.15157500 | -5.91046400 | 0.56365000  |
| H | -0.76634100 | -4.52435300 | 2.09810800  |
| H | 0.00195100  | -2.26651100 | 1.38333000  |
| H | 7.26692100  | -3.20914800 | -2.47336500 |
| H | 5.67404600  | -3.91618000 | -2.10338500 |
| H | 5.78590800  | -2.52318700 | -3.18764500 |
| H | 6.60816100  | -1.09923200 | -1.26594500 |
| H | 6.49698400  | -2.48495800 | -0.18732200 |
| H | -4.08346900 | -0.80178100 | 2.34700100  |
| H | -6.37163500 | -1.71762000 | 2.14231700  |
| H | -7.37968200 | -2.07084000 | -0.10870200 |
| H | -6.05967200 | -1.50560500 | -2.14251400 |
| H | -3.75278900 | -0.59457400 | -1.91469600 |
| H | 5.60234600  | 3.37073400  | 0.78216400  |
| H | 4.26428800  | 3.34210200  | 1.95024000  |
| H | 4.88477400  | 1.81069500  | 1.25238700  |
| H | 4.03354800  | 2.43706800  | -0.98761000 |
| H | 3.49671800  | 4.02251400  | -0.39298800 |

Imaginary Freq = 0

Electronic Energy (EE) = -1914.785005 Hartree

Thermal Free Energy Correction = 0.550704 Hartree

**EE + Thermal Free Energy Correction = -1914.234301 Hartree**

#### TS\_A

|   |             |             |             |
|---|-------------|-------------|-------------|
| C | 0.70544100  | 0.40504700  | 0.16331000  |
| N | 0.48337800  | -1.03665100 | 0.15256800  |
| C | -0.72549200 | -1.39481200 | -0.61104700 |
| N | -1.43961300 | -0.10582700 | -0.80600200 |
| C | -0.30087700 | 0.82548000  | -0.97829000 |
| C | 1.62509400  | -1.86868100 | 0.03184300  |
| C | 2.77970100  | -1.22275700 | 0.63881500  |
| O | 1.52210700  | -2.94615800 | -0.55307300 |
| C | 4.14755900  | -1.55281200 | 0.35227500  |
| O | 5.12655700  | -1.22576200 | 1.03256300  |
| C | -2.36856100 | 0.26409400  | 0.27765600  |
| C | 0.44179400  | 0.95813300  | 1.57369600  |
| O | 0.47748100  | 0.30018700  | 2.59365400  |
| O | 0.15235100  | 2.27990000  | 1.57882600  |

|   |             |             |             |
|---|-------------|-------------|-------------|
| C | -0.28585000 | 4.35653300  | 2.66493900  |
| C | 0.01352200  | 2.88287900  | 2.87662000  |
| C | -0.65486000 | 2.26851000  | -1.29849700 |
| C | 0.30039700  | 3.29155300  | -1.18538900 |
| C | 0.01185700  | 4.58864800  | -1.60611600 |
| C | -1.23512300 | 4.89930900  | -2.15371200 |
| C | -2.18712100 | 3.88987300  | -2.28401500 |
| C | -1.89553400 | 2.58815300  | -1.86870200 |
| C | -1.54176500 | -2.49969900 | 0.03972200  |
| C | -2.39819700 | -3.27859200 | -0.74638100 |
| C | -3.16347600 | -4.29577300 | -0.17724500 |
| C | -3.07606800 | -4.55191100 | 1.19262100  |
| C | -2.21470600 | -3.78771000 | 1.98172500  |
| C | -1.44912200 | -2.77030200 | 1.40964500  |
| O | 4.32317100  | -2.21644700 | -0.83933200 |
| C | 5.64600000  | -3.21022500 | -2.53684600 |
| C | 5.67395100  | -2.47733700 | -1.20427700 |
| C | -3.82509600 | -0.07436500 | -0.00886500 |
| C | -4.74877000 | -0.07071300 | 1.04523100  |
| C | -6.10387500 | -0.30544800 | 0.81501600  |
| C | -6.56215300 | -0.55375400 | -0.48109100 |
| C | -5.64990200 | -0.56847700 | -1.53677600 |
| C | -4.29373400 | -0.33177200 | -1.30164500 |
| C | 2.20339700  | 0.68408000  | -0.29155600 |
| O | 2.48896800  | 0.67351200  | -1.48802200 |
| O | 2.79275700  | 1.58521100  | 0.59490000  |
| C | 4.95058100  | 2.10579000  | 1.50868900  |
| C | 4.10844700  | 2.03825200  | 0.24444000  |
| H | -0.41702900 | -1.75063100 | -1.60305800 |
| H | 0.24207100  | 0.46806600  | -1.86477300 |
| H | 2.62942100  | -0.82541400 | 1.63557600  |
| H | -2.30164200 | 1.34905000  | 0.41247400  |
| H | -2.08553600 | -0.17603100 | 1.24284900  |
| H | -0.40314100 | 4.85808700  | 3.63299100  |
| H | 0.52739300  | 4.84254500  | 2.11699500  |
| H | -1.20760900 | 4.48896300  | 2.08937200  |
| H | -0.78872200 | 2.37729700  | 3.42566900  |
| H | 0.94181300  | 2.72913600  | 3.43714300  |
| H | 1.27050100  | 3.07343900  | -0.75657500 |
| H | 0.77032000  | 5.36183100  | -1.50485600 |
| H | -1.45757700 | 5.91341000  | -2.47839300 |
| H | -3.16193700 | 4.10745700  | -2.71517500 |
| H | -2.64019400 | 1.81050400  | -1.99621200 |
| H | -2.45953100 | -3.08726700 | -1.81515800 |
| H | -3.82376500 | -4.89135800 | -0.80359600 |
| H | -3.66773900 | -5.34811800 | 1.63914500  |
| H | -2.12901700 | -3.98954100 | 3.04710500  |
| H | -0.75921600 | -2.18662900 | 2.01203000  |
| H | 6.66589100  | -3.44179700 | -2.86993600 |
| H | 5.08482400  | -4.14652900 | -2.44901600 |



|   |             |             |             |
|---|-------------|-------------|-------------|
| H | 5.15876600  | -2.59694300 | -3.30217200 |
| H | 6.23352000  | -1.53571700 | -1.27770800 |
| H | 6.16589900  | -3.07704600 | -0.42746800 |
| H | -4.39814000 | 0.11348100  | 2.05917600  |
| H | -6.80204800 | -0.30176800 | 1.64923500  |
| H | -7.61785600 | -0.74115300 | -0.66336500 |
| H | -5.99274400 | -0.77013500 | -2.54939400 |
| H | -3.57409900 | -0.36124800 | -2.11350100 |
| H | 5.93768400  | 2.52927300  | 1.28098000  |
| H | 4.47252400  | 2.73849300  | 2.26634400  |
| H | 5.08592900  | 1.09646400  | 1.90734600  |
| H | 4.54251600  | 1.35220600  | -0.48581900 |
| H | 4.02023200  | 3.02424600  | -0.23510000 |

Imaginary Freq = 1

Electronic Energy (EE) = -1914.772255 Hartree

Thermal Free Energy Correction = 0.551544 Hartree

**EE + Thermal Free Energy Correction = -1914.220711 Hartree**

### TS\_B

|   |             |             |             |
|---|-------------|-------------|-------------|
| C | 1.24391800  | -0.46148400 | 0.86781400  |
| N | 0.33467700  | 0.57787300  | 1.32402200  |
| C | -0.96185200 | -0.06366600 | 1.60115100  |
| N | -1.11971200 | -1.03912500 | 0.48913500  |
| C | 0.22283400  | -1.66160600 | 0.49947900  |
| C | 0.65600800  | 1.91965700  | 1.01300700  |
| C | 2.08736800  | 2.04929000  | 0.78671100  |
| O | -0.21352100 | 2.78877500  | 0.92861000  |
| C | 2.68108400  | 3.15509900  | 0.08008400  |
| O | 3.83795700  | 3.55352700  | 0.19869500  |
| C | -1.52633800 | -0.42901500 | -0.78985100 |
| C | 2.17913200  | 0.10286500  | -0.26167700 |
| O | 3.35732300  | -0.24925200 | -0.36110600 |
| O | 1.40748700  | 0.37426000  | -1.38366200 |
| C | 1.17930400  | 1.35092300  | -3.54118100 |
| C | 2.15718100  | 0.76521700  | -2.53643800 |
| C | 0.47766100  | -2.64672400 | -0.63585200 |
| C | 1.72666900  | -2.83976000 | -1.24176500 |
| C | 1.90049700  | -3.83529000 | -2.20710300 |
| C | 0.84150500  | -4.65999200 | -2.58473200 |
| C | -0.40396300 | -4.48381700 | -1.97952500 |
| C | -0.57911800 | -3.49416600 | -1.01333000 |
| C | -2.21287900 | 0.72408000  | 1.97332100  |
| C | -2.88360800 | 0.28821400  | 3.12636700  |
| C | -4.08677300 | 0.86290700  | 3.53883900  |
| C | -4.65128300 | 1.89464400  | 2.79180600  |
| C | -3.99678000 | 2.34010000  | 1.64200200  |
| C | -2.79264500 | 1.76702000  | 1.23499400  |
| O | 1.84063800  | 3.73883600  | -0.85983600 |

|   |             |             |             |
|---|-------------|-------------|-------------|
| C | 1.26093200  | 5.51342600  | -2.33137800 |
| C | 2.38545900  | 4.86704500  | -1.53582400 |
| C | -3.00090200 | -0.61113300 | -1.11909000 |
| C | -3.53072400 | 0.05264500  | -2.23564500 |
| C | -4.86202400 | -0.12012700 | -2.61117900 |
| C | -5.69588700 | -0.96260000 | -1.87104700 |
| C | -5.18094300 | -1.62265600 | -0.75517900 |
| C | -3.84558600 | -1.44851900 | -0.38375100 |
| C | 2.17608300  | -0.93928700 | 2.00111000  |
| O | 2.42456800  | -0.33251700 | 3.01887200  |
| O | 2.67959300  | -2.16861100 | 1.73854800  |
| C | 4.15827600  | -3.99171900 | 2.14708400  |
| C | 3.67086800  | -2.64918600 | 2.66215600  |
| H | -0.78050300 | -0.70242100 | 2.47835100  |
| H | 0.21817500  | -2.28522700 | 1.40483000  |
| H | 2.73432000  | 1.65940400  | 1.56301800  |
| H | -0.94487400 | -0.89491500 | -1.58921000 |
| H | -1.25574700 | 0.63261900  | -0.83466300 |
| H | 1.70830500  | 1.66178400  | -4.45084800 |
| H | 0.41621600  | 0.61598700  | -3.82282600 |
| H | 0.68294100  | 2.22349600  | -3.10592800 |
| H | 2.91302600  | 1.50068700  | -2.24433500 |
| H | 2.68372500  | -0.10729300 | -2.94449300 |
| H | 2.56787400  | -2.21567400 | -0.96562500 |
| H | 2.87865800  | -3.95968900 | -2.66652500 |
| H | 0.98344100  | -5.43040200 | -3.33959200 |
| H | -1.24398000 | -5.11666300 | -2.25752400 |
| H | -1.55125900 | -3.36417800 | -0.54824800 |
| H | -2.45396700 | -0.51859100 | 3.71618400  |
| H | -4.57524100 | 0.50417800  | 4.44206000  |
| H | -5.58773700 | 2.35205000  | 3.10378600  |
| H | -4.42146900 | 3.15027000  | 1.05430100  |
| H | -2.27392000 | 2.16720600  | 0.37740500  |
| H | 1.62604300  | 6.40551900  | -2.85642700 |
| H | 0.85568800  | 4.81855200  | -3.07543100 |
| H | 0.44313700  | 5.80787100  | -1.66546500 |
| H | 2.81250200  | 5.56768700  | -0.80865200 |
| H | 3.20987700  | 4.55644000  | -2.19312100 |
| H | -2.88787100 | 0.71325600  | -2.81498200 |
| H | -5.25061900 | 0.40600200  | -3.48058500 |
| H | -6.73615000 | -1.09684100 | -2.15905800 |
| H | -5.82206300 | -2.27403000 | -0.16479400 |
| H | -3.44257700 | -1.94495000 | 0.49272900  |
| H | 4.92013700  | -4.39948400 | 2.82209300  |
| H | 3.33288800  | -4.70860000 | 2.08164300  |
| H | 4.59686100  | -3.88458000 | 1.15019000  |
| H | 4.48062200  | -1.91477600 | 2.72000400  |
| H | 3.22557700  | -2.73039200 | 3.66041100  |

Imaginary Freq = 1

Electronic Energy (EE) = -1914.757302 Hartree

Thermal Free Energy Correction = 0.55107 Hartree  
EE + Thermal Free Energy Correction = -1914.206232 Hartree

**Product A**

|   |             |             |             |
|---|-------------|-------------|-------------|
| C | 0.73333900  | 0.28494800  | 0.31171100  |
| N | 0.39634000  | -1.13585700 | 0.29461200  |
| C | -0.82259200 | -1.41229900 | -0.49226300 |
| N | -1.36651100 | -0.06440100 | -0.79988600 |
| C | -0.11916000 | 0.75300300  | -0.90278300 |
| C | 1.47424000  | -1.99522600 | 0.27424000  |
| C | 2.71163400  | -1.18804400 | 0.63260200  |
| O | 1.38419200  | -3.18428600 | -0.00046200 |
| C | 4.01180400  | -1.74659700 | 0.14610300  |
| O | 5.06217800  | -1.72107700 | 0.77009500  |
| C | -2.34109400 | 0.44742300  | 0.18107300  |
| C | 0.46519800  | 0.85308500  | 1.69066500  |
| O | 0.51336600  | 0.20673000  | 2.72296900  |
| O | 0.19145500  | 2.17972700  | 1.68452400  |
| C | -0.17173800 | 4.27930800  | 2.74918000  |
| C | 0.15652500  | 2.81308500  | 2.97220800  |
| C | -0.30579200 | 2.21163800  | -1.27512800 |
| C | 0.73758200  | 3.12983400  | -1.07642200 |
| C | 0.62547700  | 4.44211800  | -1.53213200 |
| C | -0.52490000 | 4.87002100  | -2.20049300 |
| C | -1.55999700 | 3.96231200  | -2.41692600 |
| C | -1.44626400 | 2.64435500  | -1.96576300 |
| C | -1.77774900 | -2.37759900 | 0.19014300  |
| C | -2.69255400 | -3.10391700 | -0.58055600 |
| C | -3.57856800 | -3.99887600 | 0.01812800  |
| C | -3.55531900 | -4.18362600 | 1.40188700  |
| C | -2.63761800 | -3.47152800 | 2.17618000  |
| C | -1.75057400 | -2.57687800 | 1.57527500  |
| O | 3.92856000  | -2.24409000 | -1.10437700 |
| C | 4.84309600  | -3.14230600 | -3.10206500 |
| C | 5.15778700  | -2.69006000 | -1.68645600 |
| C | -3.79400300 | 0.21946900  | -0.21202600 |
| C | -4.79489500 | 0.32050900  | 0.76369000  |
| C | -6.14229000 | 0.18924000  | 0.42872000  |
| C | -6.51548700 | -0.05083600 | -0.89580600 |
| C | -5.52674700 | -0.16097000 | -1.87448500 |
| C | -4.17888000 | -0.02764400 | -1.53458500 |
| C | 2.36570500  | 0.27103900  | -0.02644400 |
| O | 2.64055800  | 0.39206400  | -1.25749000 |
| O | 2.89708200  | 1.32365300  | 0.88529700  |
| C | 5.22284500  | 1.62943500  | 1.52487100  |
| C | 4.12767400  | 1.91293100  | 0.49750100  |
| H | -0.51001600 | -1.86643300 | -1.44250800 |
| H | 0.46243400  | 0.32817800  | -1.73576000 |

|   |             |             |             |
|---|-------------|-------------|-------------|
| H | 2.77064900  | -1.05968400 | 1.71545000  |
| H | -2.18356900 | 1.52738100  | 0.26381700  |
| H | -2.18011400 | 0.04602500  | 1.19090600  |
| H | -0.19372800 | 4.81057500  | 3.70842000  |
| H | 0.57736300  | 4.74976600  | 2.10501100  |
| H | -1.14870300 | 4.39150000  | 2.26728200  |
| H | -0.59059100 | 2.31864100  | 3.60316000  |
| H | 1.13250400  | 2.68102600  | 3.45200900  |
| H | 1.63254000  | 2.80459000  | -0.56064200 |
| H | 1.44738400  | 5.13524300  | -1.36536300 |
| H | -0.60881500 | 5.89625800  | -2.55219800 |
| H | -2.46069000 | 4.27209500  | -2.94303000 |
| H | -2.25258500 | 1.94521000  | -2.15990700 |
| H | -2.70832900 | -2.96556900 | -1.65897600 |
| H | -4.28392900 | -4.55406000 | -0.59588800 |
| H | -4.24181000 | -4.88459000 | 1.87161400  |
| H | -2.60329000 | -3.61883400 | 3.25321900  |
| H | -1.01979300 | -2.03565600 | 2.16945200  |
| H | 5.75498300  | -3.49202200 | -3.60168200 |
| H | 4.11403200  | -3.95920900 | -3.09284300 |
| H | 4.42018600  | -2.31476200 | -3.68028500 |
| H | 5.88289200  | -1.86846800 | -1.67357900 |
| H | 5.57540800  | -3.50374200 | -1.08117400 |
| H | -4.51171200 | 0.49886800  | 1.79945600  |
| H | -6.90160000 | 0.26712000  | 1.20386700  |
| H | -7.56524800 | -0.15754400 | -1.15955200 |
| H | -5.80395700 | -0.35562600 | -2.90841600 |
| H | -3.40169000 | -0.13151500 | -2.28505900 |
| H | 6.15454100  | 2.14396200  | 1.24863700  |
| H | 4.92009900  | 1.98393500  | 2.51817400  |
| H | 5.42096200  | 0.55528000  | 1.58690400  |
| H | 4.40057400  | 1.54574900  | -0.49830300 |
| H | 3.97558300  | 3.00226100  | 0.41119200  |

Imaginary Freq = 0

Electronic Energy (EE) = -1914.781455 Hartree

Thermal Free Energy Correction = 0.552112 Hartree

**EE + Thermal Free Energy Correction = -1914.229343 Hartree**

#### Product B

|   |             |             |             |
|---|-------------|-------------|-------------|
| C | -1.42434600 | 0.04035800  | -0.89930100 |
| N | -0.26440300 | 0.75010000  | -1.41201800 |
| C | 0.80916800  | -0.20183800 | -1.73195200 |
| N | 0.63945500  | -1.25921500 | -0.69963800 |
| C | -0.84183000 | -1.41108200 | -0.66960200 |
| C | -0.29560900 | 2.11302800  | -1.24055000 |
| C | -1.53120700 | 2.44586600  | -0.40966700 |
| O | 0.52333000  | 2.91132900  | -1.67952100 |
| C | -1.32706200 | 3.60191100  | 0.52029500  |
| O | -2.13412700 | 4.48792200  | 0.73263100  |

|   |             |             |             |
|---|-------------|-------------|-------------|
| C | 1.28058200  | -0.98300200 | 0.59548200  |
| C | -2.01081500 | 1.03103300  | 0.28373600  |
| O | -3.24880700 | 0.92666300  | 0.55413500  |
| O | -1.06419200 | 0.77439100  | 1.40540800  |
| C | -0.61282800 | 0.62049900  | 3.73817000  |
| C | -1.60228500 | 1.08326800  | 2.67618300  |
| C | -1.37239000 | -2.33077200 | 0.41916900  |
| C | -2.51504300 | -2.04112600 | 1.17749700  |
| C | -2.99928400 | -2.97694500 | 2.09633400  |
| C | -2.36229500 | -4.20526700 | 2.27650500  |
| C | -1.22814200 | -4.50241200 | 1.51818600  |
| C | -0.74572500 | -3.57606900 | 0.59418000  |
| C | 2.22650700  | 0.31470800  | -1.90043800 |
| C | 3.00201600  | -0.27613000 | -2.90599400 |
| C | 4.33441300  | 0.08731600  | -3.10307400 |
| C | 4.91363800  | 1.06057700  | -2.29023600 |
| C | 4.14878200  | 1.66167700  | -1.28892500 |
| C | 2.81771800  | 1.29606000  | -1.09317900 |
| O | -0.11895800 | 3.56380100  | 1.15320300  |
| C | 1.56334600  | 4.48797200  | 2.55980100  |
| C | 0.14432900  | 4.65386900  | 2.04252200  |
| C | 2.64694700  | -1.63180400 | 0.75758000  |
| C | 3.48204800  | -1.20915300 | 1.80195700  |
| C | 4.70948400  | -1.82678800 | 2.03867000  |
| C | 5.13172500  | -2.88232100 | 1.22660000  |
| C | 4.31274500  | -3.30620100 | 0.17943000  |
| C | 3.08250800  | -2.68677300 | -0.05121600 |
| C | -2.55296900 | 0.02007100  | -1.92826000 |
| O | -2.73107800 | 0.84267000  | -2.80392700 |
| O | -3.38549400 | -1.02627900 | -1.72330300 |
| C | -5.44398000 | -2.18889600 | -2.00144400 |
| C | -4.63099300 | -0.98259700 | -2.43706900 |
| H | 0.53802000  | -0.68695100 | -2.68224800 |
| H | -1.06325300 | -1.94225000 | -1.60844700 |
| H | -2.35814200 | 2.71064200  | -1.07059700 |
| H | 0.62670000  | -1.38637700 | 1.37214700  |
| H | 1.33482900  | 0.08788500  | 0.81820200  |
| H | -0.98424600 | 0.85946000  | 4.74360900  |
| H | -0.45870800 | -0.46268500 | 3.67687500  |
| H | 0.35895600  | 1.11109300  | 3.60468300  |
| H | -1.78070100 | 2.16626200  | 2.77813400  |
| H | -2.57564400 | 0.59585400  | 2.80606100  |
| H | -3.02205700 | -1.08572100 | 1.04610400  |
| H | -3.88518800 | -2.73390000 | 2.67950300  |
| H | -2.74416700 | -4.92438800 | 2.99853800  |
| H | -0.71822400 | -5.45554100 | 1.64258900  |
| H | 0.13691900  | -3.81218100 | 0.00590000  |
| H | 2.55364500  | -1.03591100 | -3.54249500 |
| H | 4.91433000  | -0.38799900 | -3.89081500 |
| H | 5.95080200  | 1.35306500  | -2.43791100 |

|   |             |             |             |
|---|-------------|-------------|-------------|
| H | 4.58740600  | 2.42997600  | -0.65706100 |
| H | 2.23504700  | 1.80073500  | -0.33391200 |
| H | 1.81453600  | 5.30439600  | 3.24793600  |
| H | 1.67376900  | 3.53848900  | 3.09448700  |
| H | 2.27913900  | 4.49902200  | 1.73113600  |
| H | 0.01692700  | 5.60071600  | 1.50556700  |
| H | -0.58723900 | 4.64399300  | 2.85970900  |
| H | 3.16073900  | -0.38551700 | 2.43701600  |
| H | 5.34007100  | -1.48030400 | 2.85485000  |
| H | 6.09063500  | -3.36370200 | 1.40554800  |
| H | 4.63317900  | -4.12246000 | -0.46500400 |
| H | 2.44656800  | -3.00153400 | -0.87220700 |
| H | -6.41603000 | -2.19246800 | -2.50926800 |
| H | -4.92236500 | -3.12102000 | -2.24455600 |
| H | -5.61278600 | -2.16521100 | -0.92060700 |
| H | -5.13450000 | -0.04152300 | -2.19374300 |
| H | -4.43463800 | -0.98834800 | -3.51549400 |

Imaginary Freq = 0

Electronic Energy (EE) = -1914.773673 Hartree

Thermal Free Energy Correction = 0.552133 Hartree

**EE + Thermal Free Energy Correction = -1914.22154 Hartree**

**Table S7:** Cartesian coordinates with the associated energies of their optimized structures.

Calculation level: M06-2X/def2-TZVP/SMD(THF)//b3lyp/6-31g(d)/SMD(THF)

| Compound | Structure                                                                           | M <sub>w</sub><br>(g/mol) | cLogP | PSA<br>(Å <sup>2</sup> ) | MSA<br>(Å <sup>2</sup> ) | rel.<br>PSA<br>(%) | H-<br>donor | H-<br>acceptor | Ro5 | MIC<br>(μg/ml) |
|----------|-------------------------------------------------------------------------------------|---------------------------|-------|--------------------------|--------------------------|--------------------|-------------|----------------|-----|----------------|
| 249a     | 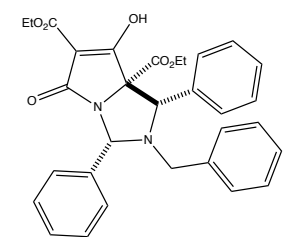   | 526.59                    | 5.13  | 96.38                    | 747.50                   | 12.89              | 1           | 5              | 2/4 | 0              |
| 249b     |    | 554.64                    | 6.15  | 96.38                    | 807.69                   | 11.93              | 1           | 5              | 2/4 | 31.25          |
| 249c     |   | 586.64                    | 4.81  | 114.84                   | 841.76                   | 13.64              | 1           | 7              | 3/4 | 0              |
| 249f     |  | 684.38                    | 6.66  | 96.38                    | 788.37                   | 12.23              | 1           | 5              | 2/4 | 31.25          |
| 249h     |  | 616.58                    | 5.00  | 182.66                   | 819.25                   | 22.30              | 1           | 9              | 3/4 | 0              |

**Table S8: Physicochemical Properties and MIC values**

## Experimental

### General techniques

Overnight reaction refers to reactions occurring between 15-24 h. All reagents were obtained from commercial sources and was used without further purification. Anhydrous solvents were dried by pre-storing them over activated 3 Å molecular sieves before being passed through an activated alumina column on a solvent tower under N<sub>2</sub> pressure. Solvents were evaporated at 40°C under reduced pressure on a Büchi R-114 rotatory evaporator attached to a Vacuubrand CVC2 pump and a pressure control system, with the exception of water, which was evaporated between 70-80°C. Analytical thin-layer chromatography (TLC) was carried out on Merck aluminium foil backed sheets precoated with 0.2 mm Kielselgel 60 F<sub>254</sub>. The eluent used is specified in each case. The spots were visualised by UV irradiation ( $\lambda=254$  nm) and by staining with KMnO<sub>4</sub> solution followed by heating. Retention factors ( $R_f$ ) are quoted to the nearest 0.01. Flash column chromatography was performed on Kielselgel 60 silica gel (230-400 mesh particle size). Melting points were measured using a Stuart Scientific SMP1 melting point instrument and are uncorrected. Infrared spectra were recorded on a Bruker Tensor 27 FT-IR spectrometer equipped with an attached Pike Miracle attenuated total reflectance (ATR) module. Absorption maxima ( $\nu_{\max}$ ) are reported in wavenumbers (cm<sup>-1</sup>) and only selected peaks are reported. <sup>1</sup>H-NMR spectra were recorded at 200 MHz, 400 MHz and 500 MHz, <sup>13</sup>C-NMR spectra were recorded at 101 MHz or 126 MHz and <sup>19</sup>F-NMR spectra were recorded at 377 MHz or 471 MHz using either a Bruker DPX200, AVIIIHD 400 and AVIIIHD 500. Chemical shifts ( $\delta_H$ ,  $\delta_F$  and  $\delta_C$ ) are reported in parts per million (ppm) upfield from TMS and are referenced to the residual solvent peak (in some cases, it was not possible to reference the chloroform peak in the <sup>1</sup>H-NMR spectra due to it being obscured by aromatic protons). Coupling constants ( $J$ ) are quoted in Hertz (Hz). Data is reported in this format: chemical shift, integration, multiplicity (s = singlet, d = doublet, t = triplet, q = quartet, qn = quintet, dd = double doublet, dt = double triplet, dq = double quartet, m = multiplet, br = broad and app = apparent), coupling constant, and assignment. Two-dimensional COSY, HSQC, HMBC and NOESY experiments were recorded at 400 MHz and 500 MHz and nOe experiments were recorded at 500 MHz. Assignments of the spectra were made with <sup>1</sup>H, COSY, HSQC, HMBC, <sup>13</sup>C and DEPT-135 experiments and



stereochemistry were assigned on the basis of nOe, NOESY or X-ray crystallography. Low resolution mass spectra ( $m/z$ ) were recorded on an Agilent 6120 spectrometer or a Waters LCT Premier XE spectrometer using electrospray ionisation (ESI). Selected peaks are reported in Daltons and their intensities given as percentages of the base peak. High resolution mass spectra (HRMS) were recorded on a Bruker microTOF (ESI) or on an Agilent 7200 Q-TOF (EI or CI). Crystals for X-ray crystallography were grown from slow vapour diffusion of petroleum ether 40:60 into a solution of compound dissolved in minimal EtOAc at room temperature. Low temperature<sup>1</sup> single-crystal X-ray diffraction data were collected using a (Rigaku) Oxford Diffraction SuperNova diffractometer. Raw frame data were collected and reduced using CrysAlisPro and the structures were solved using ‘Superflip’<sup>2</sup> before refinement with CRYSTALS<sup>3</sup>.

#### General procedure: Esterification of L-serine and DL-cysteine

To a suspension of the amino acid (1.0 eq) in MeOH (2 mL/mmol) at 0 °C, SOCl<sub>2</sub> (1.2 eq) was added drop-wise under continuous stirring and warmed to rt, then refluxed for 1-3 h. The reaction mixture was concentrated *in vacuo* to obtain the respective amino ester.

#### Methyl (2*RS*,5*S*)-2-(4-bromophenyl)-1,3-oxazolidine-5-carboxylate (A) and Methyl (S,*E*)-2-((4-bromobenzylidene)amino)-3-hydroxypropanoate (B), 10a,b, 11

L-Serine methyl ester hydrochloride (1 eq) was dissolved in methanol (5 mL/mmol). Aromatic aldehyde

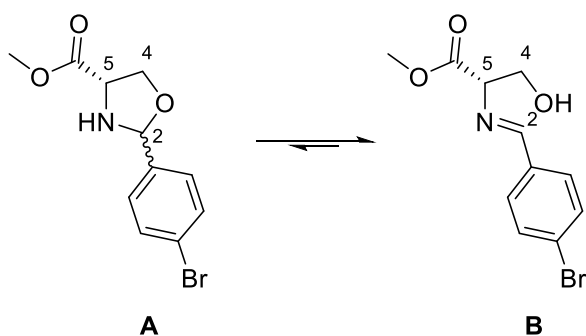

(1 eq) and Et<sub>3</sub>N (2 eq) were then added and the mixture was stirred at rt for 2 h. The solvent was evaporated off and Et<sub>2</sub>O (30 mL/mmol) was added to the residue and stirred for 30 min. The mixture was dried over Na<sub>2</sub>SO<sub>4</sub>, filtered and concentrated *in vacuo*

to give oxazolidines in high purity and was used without further purification in the subsequent step.

Yield (0.76 g, 98 %); yellow oil; 1:1.5 ring (A) and open chain (B) tautomers.  $R_f$  = 0.32 (EtOAc/petrol 1:2);  $\nu_{\max}/\text{cm}^{-1}$  (neat) 1733 (C=O); Ring tautomer (A): 1.2:1 *cis* and *trans* diastereomers:  $\delta_{\text{H}}$  (400 MHz,

CD<sub>2</sub>Cl<sub>2</sub>) major isomer (*cis*): 2.65 (1H, br. s., NH), 3.76 (3H, s, CO<sub>2</sub>CH<sub>3</sub>), 3.96 - 4.11 (3H, m, H<sub>4A</sub> + H<sub>4B</sub> + H<sub>5</sub>), 5.27 (1H, s, H<sub>2</sub>), 7.36 - 7.41 (2H, m, Ar-CH), 7.47 - 7.54 (2H, m, Ar-CH); minor isomer (*trans*): 2.65 (1H, br. s., NH), 3.75 (3H, s, CO<sub>2</sub>CH<sub>3</sub>), 3.83 (1H, dd, *J* = 8.0, 5.5 Hz, H<sub>4A</sub>), 3.96 - 4.03 (1H, m, H<sub>5</sub>), 4.04 - 4.11 (1H, m, H<sub>4B</sub>), 5.64 (1H, s, H<sub>2</sub>), 7.36 - 7.41 (2H, m, Ar-CH), 7.47 - 7.54 (2H, m, Ar-CH); δ<sub>C</sub> (100.6 MHz, CD<sub>2</sub>Cl<sub>2</sub>) major isomer (*cis*): 53.1 (CO<sub>2</sub>CH<sub>3</sub>), 60.4 (C<sub>5</sub>), 69.2 (C<sub>4</sub>), 93.3 (C<sub>2</sub>), 122.8, 137.8 (Ar-C), 128.7, 132.1 (Ar-CH), 173.3 (CO<sub>2</sub>CH<sub>3</sub>); minor isomer (*trans*): 52.9 (CO<sub>2</sub>CH<sub>3</sub>), 59.6 (C<sub>5</sub>), 68.5 (C<sub>4</sub>), 92.4 (C<sub>2</sub>), 123.3, 139.3 (Ar-C), 128.7, 131.9 (Ar-CH), 173.3 (CO<sub>2</sub>CH<sub>3</sub>); Open chain tautomer (B): δ<sub>H</sub> (400 MHz, CD<sub>2</sub>Cl<sub>2</sub>): 2.65 (1H, br. s., OH), 3.73 (3H, s, CO<sub>2</sub>CH<sub>3</sub>), 3.89 - 4.03 (2H, m, H<sub>4A</sub> + H<sub>4B</sub>), 4.14 (1H, dd, *J* = 6.1, 4.9 Hz, H<sub>5</sub>), 7.57 (2H, d, *J* = 8.6 Hz, H<sub>2'</sub>), 7.65 (2H, d, *J* = 8.6 Hz, H<sub>3'</sub>), 8.28 (1H, s, H<sub>2</sub>); δ<sub>C</sub> (100.6 MHz, CD<sub>2</sub>Cl<sub>2</sub>): 52.7 (CO<sub>2</sub>CH<sub>3</sub>), 64.1 (C<sub>4</sub>), 74.5 (C<sub>5</sub>), 126.3, 135.1 (Ar-C), 130.5, 132.4 (Ar-CH), 164.7 (C<sub>2</sub>), 171.3 (CO<sub>2</sub>CH<sub>3</sub>); *m/z* (ESI<sup>+</sup>) 286 ([M+H]<sup>+</sup> 11 %) and 288 ([M+H]<sup>+</sup> 11 %); HRMS (ESI<sup>+</sup>); C<sub>11</sub>H<sub>13</sub>O<sub>3</sub>NBr [M+H]<sup>+</sup>; found 286.00690 and 288.00482, requires 286.00733 and 288.00529.

**Methyl (2*RS*,5*S*)-2-(4-bromophenyl)-1-(3-ethoxy-3-oxopropanoyl)-1,3-oxazolidine-5-carboxylate, 12a,b**

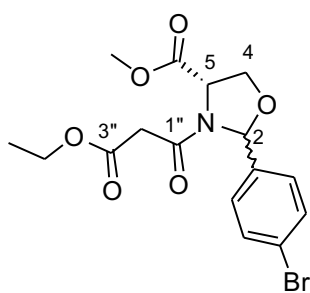

A solution of ethyl hydrogen malonate (1.2 eq) in CH<sub>2</sub>Cl<sub>2</sub> (2.5 mL/mmol) was added to a stirred solution of oxazolidine/thiazolidine (1.0 eq), DCC (1.2 eq) and DMAP (0.1 eq) in CH<sub>2</sub>Cl<sub>2</sub> (5 mL/mmol) at 0 °C. The mixture was stirred at 0 °C for 15 min and then at rt for 15 h (for thiazolidines) and 4 h (for oxazolidine). The reaction mixture was filtered to remove dicyclohexylurea and the residue was washed with CH<sub>2</sub>Cl<sub>2</sub>. The combined filtrates were concentrated *in vacuo* and purified by silica gel flash column chromatography (eluent: EtOAc/petrol) to give *N*-acylated oxazolidine **12a,b**. Yield (0.95 g, 51 %); yellow oil; 2.7:1 *cis* and *trans* diastereomers; *R<sub>f</sub>* = 0.31 (*trans*), 0.43 (*cis*) (EtOAc/petrol 1:1); ν<sub>max</sub>/cm<sup>-1</sup> (neat) 1666 (C=O), 1741 (C=O); δ<sub>H</sub> (400 MHz, CDCl<sub>3</sub>) major isomer (*cis*, a mixture of two conformers) major conformer: 1.19 - 1.31 (3H, m, OCH<sub>2</sub>CH<sub>3</sub>), 3.01, 3.04 (2H, ABq, *J*<sub>AB</sub> = 15.8 Hz, H<sub>2''</sub>), 3.80 (3H, s, CO<sub>2</sub>CH<sub>3</sub>), 4.11 (2H, q, *J* = 7.1 Hz, OCH<sub>2</sub>CH<sub>3</sub>), 4.22 - 4.29 (2H, m, H<sub>4</sub>), 4.86 (1H, app t, *J* = 5.5 Hz, H<sub>5</sub>), 6.04 (1H, s, H<sub>2</sub>), 7.57, 7.60 (4H, ABq, *J*<sub>AB</sub> = 8.7 Hz, Ar-

*CH*); minor conformer: 1.19 - 1.31 (3H, m, OCH<sub>2</sub>CH<sub>3</sub>), 3.39, 3.50 (2H, ABq,  $J_{AB} = 15.4$  Hz, H2"), 3.80 (3H, s, CO<sub>2</sub>CH<sub>3</sub>), 4.18 (2H, q,  $J = 7.2$  Hz, OCH<sub>2</sub>CH<sub>3</sub>), 4.22 - 4.29 (1H, m, H4), 4.48 (1H, dd,  $J = 9.1, 1.8$  Hz, H4), 4.77 (1H, dd,  $J = 6.6, 1.9$  Hz, H5), 6.16 (1H, s, H2), 7.40, 7.47 (4H, ABq,  $J_{AB} = 8.5$  Hz, Ar-CH);  $\delta_C$  (100.6 MHz, CDCl<sub>3</sub>) major isomer (*cis*, a mixture of two conformers) major conformer: 13.9 (OCH<sub>2</sub>CH<sub>3</sub>), 42.1 (C2"), 52.7 (CO<sub>2</sub>CH<sub>3</sub>), 58.4 (C5), 61.5 (OCH<sub>2</sub>CH<sub>3</sub>), 68.5 (C4), 90.6 (C2), 124.4, 135.4 (Ar-C), 129.7, 132.2 (Ar-CH), 164.0 (C1"), 166.4 (C3"), 169.9 (C6); minor conformer: 13.9 (OCH<sub>2</sub>CH<sub>3</sub>), 42.5 (C2"), 53.0 (CO<sub>2</sub>CH<sub>3</sub>), 58.6 (C5), 61.7 (OCH<sub>2</sub>CH<sub>3</sub>), 69.6 (C4), 90.8 (C2), 123.1, 135.9 (Ar-C), 129.1, 131.3 (Ar-CH), 164.8 (C1"), 166.9 (C3"), 169.9 (CO<sub>2</sub>CH<sub>3</sub>);  $\delta_H$  (400 MHz, CDCl<sub>3</sub>) minor isomer (*trans*, a mixture of two conformers) major conformer: 1.23 (3H, t,  $J = 7.1$  Hz, OCH<sub>2</sub>CH<sub>3</sub>), 3.04, 3.12 (2H, ABq,  $J_{AB} = 15.4$  Hz, H2"), 3.81 (3H, s, CO<sub>2</sub>CH<sub>3</sub>), 4.06 - 4.15 (3H, m, OCH<sub>2</sub>CH<sub>3</sub> + H4), 4.19 - 4.26 (1H, m, H4), 4.83 (1H, dd,  $J = 6.7, 2.8$  Hz, H5), 6.29 (1H, s, H2), 7.28 (2H, d,  $J = 8.3$  Hz, Ar-CH), 7.58 (1H, d,  $J = 8.3$  Hz, Ar-CH); minor conformer: 1.31 (3H, t,  $J = 7.1$  Hz, OCH<sub>2</sub>CH<sub>3</sub>), 3.39 - 3.43 (2H, m, H2"), 3.87 (3H, s, CO<sub>2</sub>CH<sub>3</sub>), 4.19 - 4.26 (3H, m, OCH<sub>2</sub>CH<sub>3</sub> + H4), 4.30 - 4.35 (1H, m, H4), 4.77 (1H, app d,  $J = 5.6$  Hz, H5), 6.42 (1H, s, H2), 7.31 (2H, d,  $J = 8.3$  Hz, Ar-CH), 7.50 (1H, d,  $J = 8.3$  Hz, Ar-CH);  $\delta_C$  (100.6 MHz, CDCl<sub>3</sub>) minor isomer (*trans*, a mixture of two conformers) major conformer: 14.0 (OCH<sub>2</sub>CH<sub>3</sub>), 42.4 (C2"), 52.8 (CO<sub>2</sub>CH<sub>3</sub>), 58.7 (C5), 61.6 (OCH<sub>2</sub>CH<sub>3</sub>), 67.4 (C4), 89.8 (C2), 124.4, 135.4 (Ar-C), 128.7, 132.4 (Ar-CH), 163.7 (C1"), 166.0 (C3"), 169.6 (CO<sub>2</sub>CH<sub>3</sub>); minor conformer: 14.1 (OCH<sub>2</sub>CH<sub>3</sub>), 42.8 (C2"), 53.4 (CO<sub>2</sub>CH<sub>3</sub>), 59.0 (C5), 61.8 (OCH<sub>2</sub>CH<sub>3</sub>), 69.0 (C4), 90.2 (C2), 123.0, 136.3 (Ar-C), 128.2, 131.6 (Ar-CH), 164.2 (C1"), 167.1 (C3"), 170.4 (CO<sub>2</sub>CH<sub>3</sub>);  $m/z$  (ESI<sup>+</sup>) 424 ([M+Na]<sup>+</sup> 100%) and 426 ([M+Na]<sup>+</sup> 100%); HRMS (ESI<sup>+</sup>); C<sub>16</sub>H<sub>19</sub>O<sub>6</sub>NBr [M+H]<sup>+</sup>; found 400.03808 and 402.03594, requires 400.03903 and 402.03698.

**(2*S*,5*S*)-1-Aza-2-(4-bromophenyl)-7-ethoxycarbonyl-6-hydroxy-8-oxo-3-oxabicyclo[3.3.0]oct-6-ene, 13**

To a solution of the *N*-acylated oxazolidine (1.0 eq) in THF (5 mL/mmol), KO<sup>t</sup>Bu (1.0 eq) was added and heated at reflux for 3 h. It was then cooled to rt and concentrated *in vacuo*. The crude was purified

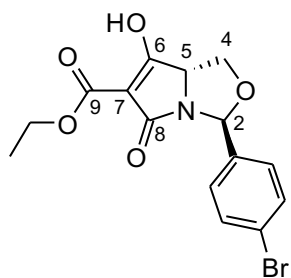

directly by silica gel flash column chromatography (eluent; EtOAc/MeOH/1 %

Et<sub>3</sub>N) to give **13**. Yield (0.19 g, 8 %); yellow solid, mp 136 - 138 °C;  $R_f = 0.29$

(EtOAc/MeOH 9:1);  $[\alpha]_D^{25} = -13.2$ , ( $c = 0.33$ , MeOH);  $\nu_{\max}/\text{cm}^{-1}$  (neat) 1639

(C=C), 1697 (C=O), 1738 (C=O);  $\delta_{\text{H}}$  (400 MHz, Methanol-*d*<sub>4</sub>): 1.23 - 1.30 (3H,

m, OCH<sub>2</sub>CH<sub>3</sub>), 3.66 - 3.77 (1H, m, H<sub>4A</sub>), 3.86 - 4.01 (2H, m, H<sub>4B</sub> + H<sub>5</sub>), 4.13

- 4.28 (2H, m, OCH<sub>2</sub>CH<sub>3</sub>), 6.24 (1H, s, H<sub>2</sub>), 7.38 (2H, d,  $J = 8.3$  Hz, Ar-H), 7.48 (2H, d,  $J = 8.3$  Hz,

Ar-H);  $\delta_{\text{C}}$  (100.6 MHz, Methanol-*d*<sub>4</sub>): 15.2 (OCH<sub>2</sub>CH<sub>3</sub>), 60.2 (OCH<sub>2</sub>CH<sub>3</sub>), 65.4 (C<sub>5</sub>), 67.6 (C<sub>4</sub>), 89.6

(C<sub>2</sub>), 92.6 (C<sub>7</sub>), 123.2, 140.4 (Ar-C), 129.6, 132.5 (Ar-CH), 167.8 (C<sub>8</sub>), 183.7 (C<sub>9</sub>), 196.3 (C<sub>6</sub>);  $m/z$

(ESI<sup>-</sup>) 366.0 and 368.0 ([M-H]<sup>-</sup>, 100%); HRMS (ESI<sup>-</sup>); C<sub>15</sub>H<sub>13</sub>O<sub>5</sub>NBr [M-H]<sup>-</sup>; found 365.99948 and

367.99725, requires 365.99826 and 367.99621.

#### (2*S*\*,3*R*\*)-2-Amino-3-hydroxy-3-phenylpropanoic acid hydrochloride salt :<sup>4,5</sup>

To a stirring solution of 3 M NaOH (aq.) (1.5 eq.) at rt was added glycine (1.0 eq.) and the solution was stirred for 10 min. Benzaldehyde (2.1 eq.) was added and the solution was stirred until a solid condensation cake formed. The solid was broken apart after 48-72 h at rt and 3 M HCl (aq.) was added to acidify the solution to pH 1 and the mixture was stirred until the solid was consumed to give a clear solution. The solution was separated between Et<sub>2</sub>O and water and the aqueous layer was reduced to dryness *in-vacuo* to give β-arylserine as a HCl salt that was contaminated with NaCl and was used without further purification.

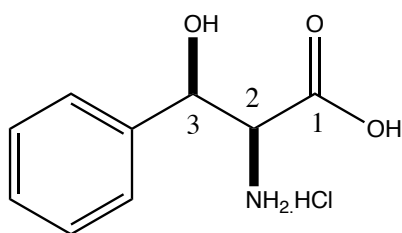

Yield (9.12 g, Quantitative); Off-white solid; m.p. 159-163°C (lit.<sup>4</sup> 150-

152°C);  $\nu_{\max}/\text{cm}^{-1}$  3033 (O-H/N-H), 1725 (C=O); Diastereomeric ratio

between *threo*:*erythro* 93:7;  $\delta_{\text{H}}$  (*Threo*) (400 MHz, D<sub>2</sub>O) 4.07 (1H, d,  $J = 4.1$  Hz,

H<sub>2</sub>), 5.37 (1H, d,  $J = 4.0$  Hz, H<sub>3</sub>), 7.28-7.51 (5H, m, Ar-H);  $\delta_{\text{C}}$  (*Threo*) (101 MHz,

D<sub>2</sub>O) 60.2 (C<sub>2</sub>), 71.0 (C<sub>3</sub>), 125.9 (Ar-C), 128.7 (Ar-C), 129.0 (Ar-C), 138.6 (Ar-C), 171.4 (C<sub>1</sub>); LRMS (ESI<sup>-</sup>)  $m/z$ : 180.1

([M - H]<sup>-</sup> 96%); HRMS (ESI<sup>-</sup>)  $m/z$ : [M - H]<sup>-</sup> calcd. for C<sub>9</sub>H<sub>10</sub>NO<sub>3</sub>, 180.0666, found 180.0659.

#### Methyl (2*S*\*,3*R*\*)-2-amino-3-hydroxy-3-phenylpropanoate hydrochloride salt **1a**:<sup>5,6</sup>

SOCl<sub>2</sub> (1.2 eq.) was added dropwise to a stirring solution of amino acid (1.0 eq.) in MeOH at 0°C and left to stir for 15 mins at this temperature. The mixture was then refluxed overnight. The reaction was then stopped and



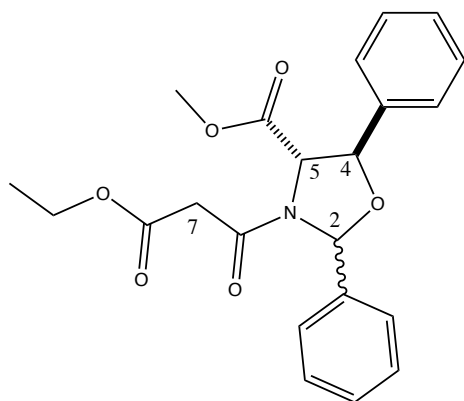

Yield (486 mg, 14% over two steps from **1e**); Yellow oil;  $R_f$  (30% EtOAc in Pet. Ether 40:60) 0.35<sub>(216a)</sub> and 0.18<sub>(217a)</sub>;  $\nu_{\max}/\text{cm}^{-1}$  2933 (C-H), 1742 (C=O), 1663 (C=O); 1.6:1 diastereomeric ratio at the C2-position; **16a** had a mixture of rotamers;  $\delta_{\text{H}}$  (**216a**, Major rotamer) (400 MHz,  $\text{CDCl}_3$ ) 1.23 (3H, t,  $J=7.1$  Hz,  $\text{OCH}_2\text{CH}_3$ ), 3.13 (1H, d,  $J=15.6$  Hz, H7), 3.16 (1H, d,  $J=15.6$  Hz, H7), 3.81 (3H, s,  $\text{OCH}_3$ ), 4.12 (2H, dq,  $J=2.0$  Hz, 7.1 Hz,

$\text{OCH}_2\text{CH}_3$ ), 4.81 (1H, d,  $J=6.3$  Hz, H5), 5.25 (1H, d,  $J=6.3$  Hz, H4), 6.38 (1H, s, H2), 7.38-7.81 (10H, m, Ar-H);  $\delta_{\text{C}}$  (**216a**, Major rotamer) (101 MHz,  $\text{CDCl}_3$ ) 14.1 ( $\text{OCH}_2\text{CH}_3$ ), 42.2 (C7), 52.9 ( $\text{OCH}_3$ ), 61.7 ( $\text{OCH}_2\text{CH}_3$ ), 64.8 (C5), 80.7 (C4), 90.6 (C2), 126.6 (Ar-C), 127.9 (Ar-C), 129.0 (Ar-C), 129.2 (Ar-C), 129.2 (Ar-C), 130.1 (Ar-C), 136.3 (Ar-C), 136.9 (Ar-C), 164.2 (C=O), 166.5 (C=O), 169.8 (C=O);  $\delta_{\text{H}}$  (**217a**) (400 MHz,  $\text{CDCl}_3$ ) 1.21 (3H, t,  $J=7.1$  Hz,  $\text{OCH}_2\text{CH}_3$ ), 2.82 (1H, d,  $J=15.7$  Hz, H7), 2.92 (1H, d,  $J=15.7$  Hz, H7), 3.80 (3H, s,  $\text{OCH}_3$ ), 4.06 (2H, q,  $J=7.2$  Hz,  $\text{OCH}_2\text{CH}_3$ ), 4.64 (1H, d,  $J=8.1$  Hz, H5), 5.18 (1H, d,  $J=8.1$  Hz, H4), 6.30 (1H, s, H2), 7.31-7.54 (10H, m, Ar-H);  $\delta_{\text{C}}$  (**217a**) (101 MHz,  $\text{CDCl}_3$ ) 14.1 ( $\text{OCH}_2\text{CH}_3$ ), 42.3 (C7), 52.8 ( $\text{OCH}_3$ ), 61.5 ( $\text{OCH}_2\text{CH}_3$ ), 66.8 (C5), 82.2 (C4), 91.6 (C2), 126.4 (Ar-C), 128.3 (Ar-C), 128.9 (Ar-C), 129.2 (Ar-C), 129.4 (Ar-C), 130.7 (Ar-C), 136.1 (Ar-C), 136.8 (Ar-C), 163.9 (C=O), 166.3 (C=O), 169.6 (C=O); LRMS (**216a**) ( $\text{ESI}^+$ )  $m/z$ : 420.0 ( $[\text{M} + \text{Na}]^+$  95%); LRMS (**217a**) ( $\text{ESI}^+$ )  $m/z$ : 420.0 ( $[\text{M} + \text{Na}]^+$  95%); HRMS ( $\text{ESI}^+$ )  $m/z$ :  $[\text{M} + \text{Na}]^+$  calcd. for  $\text{C}_{22}\text{H}_{23}\text{NO}_6\text{Na}$ , 420.1418, found 420.1418.

### Methyl (4*S*\*,5*R*\*)-3-(3-ethoxy-3-oxopropanoyl)-5-phenyl-2-(*p*-tolyl)oxazolidine-4-carboxylate **16b**, **17b**

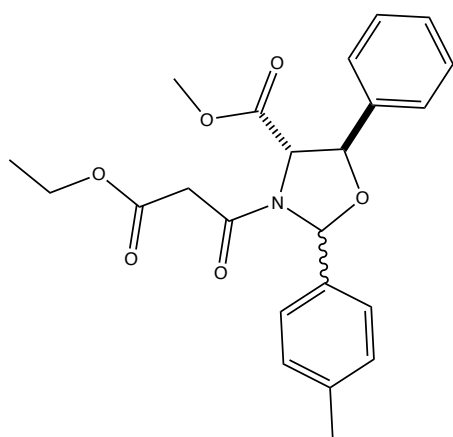

Yield (2.32 g, 43% over two steps from **1e**); Pale yellow oil;  $R_f$  (30% EtOAc in Pet. Ether 40:60) 0.35<sub>(216b)</sub> and 0.20<sub>(217b)</sub>;  $\nu_{\max}/\text{cm}^{-1}$  2985 (C-H), 1742 (C=O), 1662 (C=O); 1.1:1 diastereomeric ratio at the C2-position; **16b** had a mixture of rotamers;  $\delta_{\text{H}}$  (**216b**, Major rotamer) (400 MHz,  $\text{CDCl}_3$ ) 1.23 (3H, t,  $J=7.2$  Hz,  $\text{OCH}_2\text{CH}_3$ ), 2.40 (3H, s,  $\text{CH}_3$ ), 3.13 (1H, d,  $J=15.6$  Hz, H7), 3.18 (1H, d,  $J=15.6$  Hz, H7), 3.82 (3H, s,  $\text{OCH}_3$ ), 4.14 (2H, q,  $J=7.1$  Hz,  $\text{OCH}_2\text{CH}_3$ ), 4.81 (1H, d,  $J=6.2$  Hz, H5), 5.27 (1H, d,  $J=6.2$  Hz, H4), 6.35

(1H, s, H2), 7.27-7.70 (9H, m, Ar-H);  $\delta_{\text{C}}$  (**216b**, Major rotamer) (101 MHz,  $\text{CDCl}_3$ ) 14.1 ( $\text{OCH}_2\text{CH}_3$ ), 21.4 ( $\text{CH}_3$ ), 42.2 (C7), 52.8 ( $\text{OCH}_3$ ), 61.7 ( $\text{OCH}_2\text{CH}_3$ ), 64.8 (C5), 80.6 (C4), 90.5 (C2), 126.6 (Ar-C), 127.9 (Ar-C), 129.0 (Ar-C), 129.2 (Ar-

C), 129.8 (Ar-C), 133.9 (Ar-C), 136.4 (Ar-C), 140.1 (Ar-C), 164.2 (C=O), 166.6 (C=O), 169.8 (C=O);  $\delta_{\text{H}}$  (217b) (400 MHz, CDCl<sub>3</sub>) 1.23 (3H, t,  $J=7.2$  Hz, OCH<sub>2</sub>CH<sub>3</sub>), 2.40 (3H, s, CH<sub>3</sub>), 2.84 (1H, d,  $J=15.7$  Hz, H7), 2.94 (1H, d,  $J=15.7$  Hz, H7), 3.81 (3H, s, OCH<sub>3</sub>), 4.08 (2H, q,  $J=7.2$  Hz, OCH<sub>2</sub>CH<sub>3</sub>), 4.63 (1H, d,  $J=8.2$  Hz, H5), 5.17 (1H, d,  $J=8.2$  Hz, H4), 6.28 (1H, s, H2), 7.26-7.42 (9H, m, Ar-H);  $\delta_{\text{C}}$  (217b) (101 MHz, CDCl<sub>3</sub>) 14.1 (OCH<sub>2</sub>CH<sub>3</sub>), 21.5 (CH<sub>3</sub>), 42.3 (C7), 52.8 (OCH<sub>3</sub>), 61.4 (OCH<sub>2</sub>CH<sub>3</sub>), 66.8 (C5), 82.1 (C4), 91.5 (C2), 126.4 (Ar-C), 128.2 (Ar-C), 128.9 (Ar-C), 129.2 (Ar-C), 130.1 (Ar-C), 133.8 (Ar-C), 136.2 (Ar-C), 140.9 (Ar-C), 163.9 (C=O), 166.4 (C=O), 169.6 (C=O); LRMS (216b) (ESI<sup>+</sup>)  $m/z$ : 412.7 ([M + H]<sup>+</sup> 40%); LRMS (217b) (ESI<sup>+</sup>)  $m/z$ : 412.7 ([M + H]<sup>+</sup> 50%); HRMS (ESI<sup>+</sup>)  $m/z$ : [M + Na]<sup>+</sup> calcd. for C<sub>23</sub>H<sub>25</sub>NO<sub>6</sub>Na, 434.1574, found 434.1572.

**Methyl (4S\*,5R\*)-3-(3-ethoxy-3-oxopropanoyl)-2-(4-fluorophenyl)-5-phenyloxazolidine-4-carboxylate**  
**16c,17c**

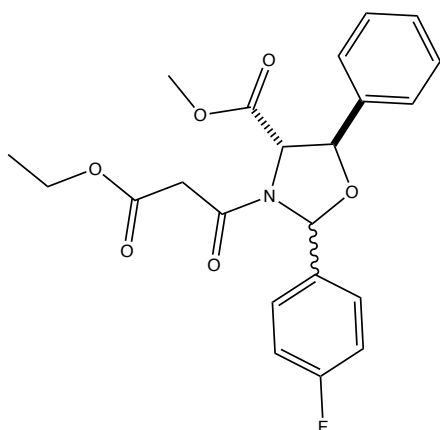

Yield (2.66 g, 49% over two steps from **1e**); Orange oil; R<sub>f</sub> (30% EtOAc in Pet. Ether 40:60) 0.30(216c) and 0.10(217c);  $\nu_{\text{max}}/\text{cm}^{-1}$  2986 (C-H), 1743 (C=O), 1662 (C=O); 1.1:1 diastereomeric ratio at the C2-position; **16c** had a mixture of rotamers;  $\delta_{\text{H}}$  (216c, Major rotamer) (400 MHz, CDCl<sub>3</sub>) 1.23 (3H, t,  $J=7.2$  Hz, OCH<sub>2</sub>CH<sub>3</sub>), 3.14 (1H, d,  $J=15.5$  Hz, H7), 3.15 (1H, d,  $J=15.5$  Hz, H7), 3.82 (3H, s, OCH<sub>3</sub>), 4.14 (2H, m, OCH<sub>2</sub>CH<sub>3</sub>), 4.82 (1H, d,  $J=6.2$  Hz, H5), 5.24 (1H, d,  $J=6.2$  Hz, H4), 6.37 (1H, s, H2), 7.05-7.84 (9H, m, Ar-H);  $\delta_{\text{C}}$

(216c, Major rotamer) (101 MHz, CDCl<sub>3</sub>) 14.1 (OCH<sub>2</sub>CH<sub>3</sub>), 42.2 (C7), 52.9 (OCH<sub>3</sub>), 61.8 (OCH<sub>2</sub>CH<sub>3</sub>), 64.7 (C5), 80.7 (C4), 89.9 (C2), 116.2 (d,  $J=22.0$  Hz, Ar-C), 126.6 (Ar-C), 129.0 (Ar-C), 129.3 (Ar-C), 130.1 (d,  $J=8.4$  Hz, Ar-C), 132.8 (d,  $J=3.1$  Hz, Ar-C), 136.2 (Ar-C), 163.8 (d,  $J=249.7$  Hz, Ar-C), 164.1 (C=O), 166.4 (C=O), 169.9 (C=O);  $\delta_{\text{F}}$  (216c, Major rotamer) (377 MHz, CDCl<sub>3</sub>) -110.93;  $\delta_{\text{H}}$  (217c) (400 MHz, CDCl<sub>3</sub>) 1.22 (3H, t,  $J=7.1$  Hz, OCH<sub>2</sub>CH<sub>3</sub>), 2.86 (1H, d,  $J=15.6$  Hz, H7), 2.94 (1H, d,  $J=15.6$  Hz, H7), 3.81 (3H, s, OCH<sub>3</sub>), 4.07 (2H, q,  $J=7.1$  Hz, OCH<sub>2</sub>CH<sub>3</sub>), 4.65 (1H, d,  $J=8.0$  Hz, H5), 5.18 (1H, d,  $J=8.0$  Hz, H4), 6.32 (1H, s, H2), 7.14-7.53 (9H, m, Ar-H);  $\delta_{\text{C}}$  (217c) (101 MHz, CDCl<sub>3</sub>) 14.1 (OCH<sub>2</sub>CH<sub>3</sub>), 42.3 (C7), 52.9 (OCH<sub>3</sub>), 61.6 (OCH<sub>2</sub>CH<sub>3</sub>), 66.7 (C5), 82.1 (C4), 90.8 (C2), 116.5 (d,  $J=21.6$  Hz, Ar-C), 126.4 (Ar-C), 128.9 (Ar-C), 129.3 (Ar-C), 130.3 (d,  $J=8.6$  Hz, Ar-C), 132.7 (d,  $J=3.0$  Hz, Ar-C), 136.0 (Ar-C), 163.8 (C=O), 163.9 (d,

$J=250.6$  Hz, Ar-C), 166.2 (C=O), 169.5 (C=O);  $\delta_F$  (217c) (377 MHz,  $CDCl_3$ ) -109.52; LRMS (216c) (ESI<sup>+</sup>)  $m/z$ : 416.6 ([M + H]<sup>+</sup> 85%); HRMS (ESI<sup>+</sup>)  $m/z$ : [M + Na]<sup>+</sup> calcd. for  $C_{22}H_{22}NO_6FNa$ , 438.1323, found 438.1322.

**Methyl (4S\*,5R\*)-2-(4-bromophenyl)-3-(3-ethoxy-3-oxopropanoyl)-5-phenyloxazolidine-4-carboxylate 16d,17d**

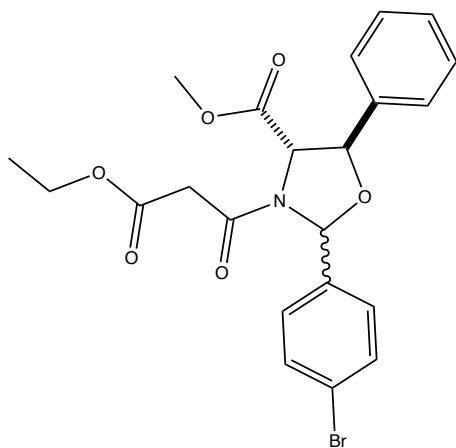

Yield (1.55 g, 25% over two steps from **1e**); Orange oil;  $R_f$  (30% EtOAc in Pet. Ether 40:60) 0.28(216d) and 0.13(217d);  $\nu_{max}/cm^{-1}$  2983 (C-H), 1744 (C=O), 1664 (C=O); 1.6:1 diastereomeric ratio at the C2-position; **16d** had a mixture of rotamers;  $\delta_H$  (216d, Major rotamer) (400 MHz,  $CDCl_3$ ) 1.24 (3H, t,  $J=7.1$  Hz,  $OCH_2CH_3$ ), 3.16 (2H, s, H7), 3.81 (3H, s,  $OCH_3$ ), 4.14 (2H, q,  $J=7.1$  Hz,  $OCH_2CH_3$ ), 4.80 (1H, d,  $J=6.5$  Hz, H5), 5.20 (1H, d,  $J=6.5$  Hz, H4), 6.36 (1H, s, H2), 7.33-7.71 (9H, m, Ar-H);  $\delta_C$  (216d, Major rotamer) (101 MHz,  $CDCl_3$ ) 14.1 ( $OCH_2CH_3$ ), 42.2 (C7), 52.9 ( $OCH_3$ ), 61.9 ( $OCH_2CH_3$ ), 64.7 (C5), 80.9 (C4), 89.9 (C2), 124.5 (Ar-C), 126.3 (Ar-C), 126.6 (Ar-C), 129.0 (Ar-C), 129.7 (Ar-C), 132.4 (Ar-C), 135.9 (Ar-C), 136.0 (Ar-C), 164.0 (C=O), 166.4 (C=O), 169.8 (C=O);  $\delta_H$  (217d) (400 MHz,  $CDCl_3$ ) 1.22 (3H, t,  $J=7.1$  Hz,  $OCH_2CH_3$ ), 2.87 (1H, d,  $J=15.6$  Hz, H7), 2.95 (1H, d,  $J=15.5$  Hz, H7), 3.81 (3H, s,  $OCH_3$ ), 4.08 (2H, dq,  $J=1.5$  Hz, 7.2 Hz,  $OCH_2CH_3$ ), 4.64 (1H, d,  $J=8.0$  Hz, H5), 5.18 (1H, d,  $J=8.0$  Hz, H4), 6.29 (1H, s, H2), 7.33-7.89 (9H, m, Ar-H);  $\delta_C$  (217d) (101 MHz,  $CDCl_3$ ) 14.1 ( $OCH_2CH_3$ ), 42.3 (C7), 52.9 ( $OCH_3$ ), 61.6 ( $OCH_2CH_3$ ), 66.7 (C5), 82.3 (C4), 90.9 (C2), 125.0 (Ar-C), 126.3 (Ar-C), 128.9 (Ar-C), 129.3 (Ar-C), 129.9 (Ar-C), 132.6 (Ar-C), 135.9 (Ar-C), 136.0 (Ar-C), 163.7 (C=O), 166.1 (C=O), 169.5 (C=O); LRMS (216d) (ESI<sup>+</sup>)  $m/z$ : 498.0 ([M<sup>79</sup> + Na]<sup>+</sup> 95%), 500.0 ([M<sup>81</sup> + Na]<sup>+</sup> 97%); LRMS (217d) (ESI<sup>+</sup>)  $m/z$ : 498.0 ([M<sup>79</sup> + Na]<sup>+</sup> 94%), 500.0 ([M<sup>81</sup> + Na]<sup>+</sup> 95%); HRMS (ESI<sup>+</sup>)  $m/z$ : [M<sup>79</sup> + Na]<sup>+</sup> calcd. for  $C_{22}H_{22}NO_6BrNa$ , 498.0523, found 498.0522; [M<sup>81</sup> + Na]<sup>+</sup> calcd. for  $C_{22}H_{22}NO_6BrNa$ , 500.0504, found 500.0502.

**General procedure for the synthesis of tetramates:<sup>5,8,9</sup>**

To a solution of malonamide **17a-d** (1.0 eq.) in anhydrous THF was added potassium *tert*-butoxide (1.1 eq.). The mixture was heated at reflux for 3 h. Then the reaction mixture was left to cool to room temperature and then separated between  $Et_2O$  and water and the aqueous layer was acidified to pH 1-2 using 3 M HCl solution (aq.)



and extracted with EtOAc. The organic layer was washed with brine, dried over Na<sub>2</sub>SO<sub>4</sub>, filtered and concentrated under reduced pressure to obtain the desired ethyl ester tetramates **18a-d** and was used without further purification.

**Ethyl (1*R*\*,3*S*\*,7*aS*\*)-7-hydroxy-5-oxo-1,3-diphenyl-5,7*a*-dihydro-1*H*,3*H*-pyrrolo[1,2-*c*]oxazole-6-carboxylate**

**18a**

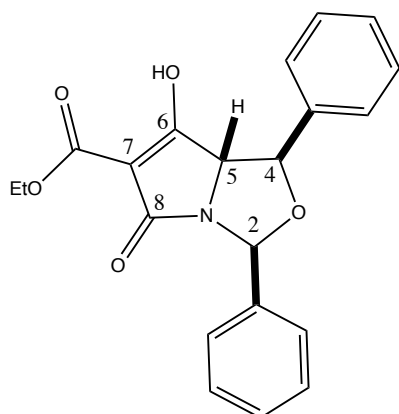

Yield (57 mg, 37%); Orange oil;  $\nu_{\max}/\text{cm}^{-1}$  2983 (C-H), 1700 (C=O), 1661 (C=O), 1614 (C=C);  $\delta_{\text{H}}$  (400 MHz, CDCl<sub>3</sub>) 1.41 (3H, t,  $J=7.1$  Hz, OCH<sub>2</sub>CH<sub>3</sub>), 4.38 (1H, d,  $J=8.4$  Hz, H5), 4.42 (2H, m, OCH<sub>2</sub>CH<sub>3</sub>), 4.81 (1H, d,  $J=8.3$  Hz, H4), 6.37 (1H, s, H2), 7.36-7.66 (10H, m, Ar-H);  $\delta_{\text{C}}$  (101 MHz, CDCl<sub>3</sub>) 14.2 (OCH<sub>2</sub>CH<sub>3</sub>), 62.0 (OCH<sub>2</sub>CH<sub>3</sub>), 67.4 (C5), 81.8 (C4), 88.2 (C2), 100.1 (C7), 126.3 (Ar-C), 126.6 (Ar-C), 128.6 (Ar-C), 128.8 (Ar-C), 128.9 (Ar-C), 129.1 (Ar-C), 135.7 (Ar-C), 139.0 (Ar-C), 167.3 (C=O), 175.2 (C8), 185.7 (C6); LRMS (ESI<sup>-</sup>)  $m/z$ : 364.0

([M - H]<sup>-</sup> 100%); HRMS (ESI<sup>-</sup>)  $m/z$ : [M - H]<sup>-</sup> calcd. for C<sub>21</sub>H<sub>18</sub>NO<sub>5</sub>, 364.1191, found 364.1195.

**Ethyl (1*R*\*,3*S*\*,7*aS*\*)-7-hydroxy-5-oxo-1-phenyl-3-(*p*-tolyl)-5,7*a*-dihydro-1*H*,3*H*-pyrrolo[1,2-*c*]oxazole-6-carboxylate **18b****

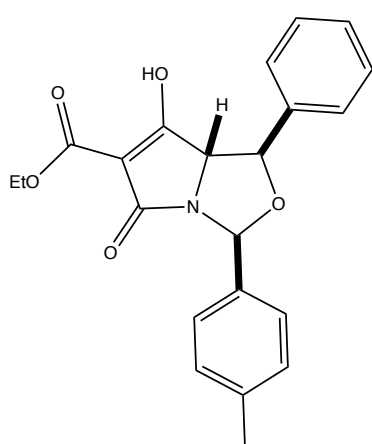

Yield (567 mg, 55%); Orange oil;  $\delta_{\text{H}}$  (400 MHz, CDCl<sub>3</sub>) 1.42 (3H, t,  $J=7.1$  Hz, OCH<sub>2</sub>CH<sub>3</sub>), 2.39 (3H, s, CH<sub>3</sub>), 4.38 (1H, d,  $J=8.4$  Hz, H5), 4.43 (2H, m, OCH<sub>2</sub>CH<sub>3</sub>), 4.80 (1H, d,  $J=8.3$  Hz, H4), 6.35 (1H, s, H2), 7.23-7.54 (9H, m, Ar-H);  $\delta_{\text{C}}$  (101 MHz, CDCl<sub>3</sub>) 14.3 (OCH<sub>2</sub>CH<sub>3</sub>), 21.3 (CH<sub>3</sub>), 62.0 (OCH<sub>2</sub>CH<sub>3</sub>), 67.5 (C5), 81.8 (C4), 88.3 (C2), 126.3 (Ar-C), 126.6 (Ar-C), 128.9 (Ar-C), 129.1 (Ar-C), 129.3 (Ar-C), 135.8 (Ar-C), 136.2 (Ar-C), 138.6 (Ar-C), 167.4 (C=O), 175.3 (C8), 185.7 (C6).

**Ethyl (1*R*\*,3*S*\*,7*aS*\*)-3-(4-fluorophenyl)-7-hydroxy-5-oxo-1-phenyl-5,7*a*-dihydro-1*H*,3*H*-pyrrolo[1,2-*c*]oxazole-6-carboxylate **18c****

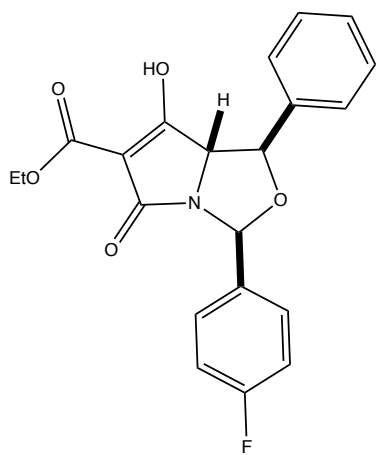

Yield (643 mg, 64%); Yellow foamy solid; m.p. 53-58°C;  $\nu_{\max}/\text{cm}^{-1}$  3245 (O-H), 2984 (C-H), 1700 (C=O), 1657 (C=O), 1607 (C=C);  $\delta_{\text{H}}$  (400 MHz,  $\text{CDCl}_3$ ) 1.41 (3H, t,  $J=7.1$  Hz,  $\text{OCH}_2\text{CH}_3$ ), 4.37 (1H, d,  $J=8.3$  Hz, H5), 4.42 (2H, m,  $\text{OCH}_2\text{CH}_3$ ), 4.80 (1H, d,  $J=8.4$  Hz, H4), 6.32 (1H, s, H2), 7.10 (2H, app t,  $J=8.7$  Hz, Ar-H), 7.34-7.50 (5H, m, Ar-H), 7.61 (2H, dd,  $J=5.4$  Hz, 8.5 Hz, Ar-H);  $\delta_{\text{C}}$  (101 MHz,  $\text{CDCl}_3$ ) 14.3 ( $\text{OCH}_2\text{CH}_3$ ), 62.1 ( $\text{OCH}_2\text{CH}_3$ ), 67.4 (C5), 81.8 (C4), 87.8 (C2), 115.5 (d,  $J=21.8$  Hz, Ar-C), 126.6 (Ar-C), 128.3 (d,  $J=8.4$  Hz, Ar-C), 129.0 (Ar-C), 129.3 (Ar-C), 134.9 (d,  $J=3.1$  Hz, Ar-C), 135.6 (Ar-C), 163.1 (d,  $J=247.0$  Hz, Ar-C), 167.3 (C=O), 185.8 (C6);  $\delta_{\text{F}}$  (377 MHz,  $\text{CDCl}_3$ ) -113.28.

**Ethyl (1R\*,3S\*,7aS\*)-3-(4-bromophenyl)-7-hydroxy-5-oxo-1-phenyl-5,7a-dihydro-1H,3H-pyrrolo[1,2-c]oxazole-6-carboxylate 18d**

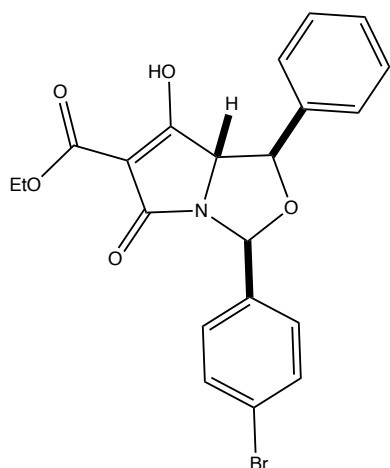

Yield (488 mg, 62%); Red semi-solid/oil;  $\delta_{\text{H}}$  (400 MHz,  $\text{CDCl}_3$ ) 1.41 (3H, t,  $J=7.1$  Hz,  $\text{OCH}_2\text{CH}_3$ ), 4.35 (1H, d,  $J=8.4$  Hz, H5), 4.42 (2H, m,  $\text{OCH}_2\text{CH}_3$ ), 4.80 (1H, d,  $J=8.4$  Hz, H4), 6.30 (1H, s, H2), 7.40-7.56 (9H, m, Ar-H);  $\delta_{\text{C}}$  (101 MHz,  $\text{CDCl}_3$ ) 14.3 ( $\text{OCH}_2\text{CH}_3$ ), 62.1 ( $\text{OCH}_2\text{CH}_3$ ), 67.3 (C5), 81.9 (C4), 87.7 (C2), 100.2 (C7), 122.9 (Ar-C), 126.6 (Ar-C), 128.1 (Ar-C), 129.0 (Ar-C), 129.3 (Ar-C), 131.7 (Ar-C), 135.5 (Ar-C), 138.1 (Ar-C), 167.3 (C=O), 171.2 (C8), 185.7 (C6); LRMS (ESI<sup>-</sup>)  $m/z$ : 441.9 ( $[\text{M}^{79} - \text{H}]^-$  95%), 443.9 ( $[\text{M}^{81} - \text{H}]^-$  97%).

**General procedure for the synthesis of Imidazolidine.**<sup>5,8-11</sup>

Diethyl aminomalonate hydrochloride salt **19** (1.0 eq.) was suspended in petroleum ether 40:60 and cooled to 0°C. Triethylamine (1.2-1.4 eq.), aldehyde (2.1-2.5 eq.) and amine (1.0-1.2 eq.) were added dropwise, and the mixture was then heated to more than 100°C with continuous removal of water using a Dean-Stark apparatus for 16-24 h. The white/brown precipitate was then filtered and washed with  $\text{Et}_2\text{O}$ . The combined filtrates were then concentrated under reduced pressure and then purified by flash column chromatography to yield the desired imidazolidines **20a-I** and **26**.

### Diethyl (2*R*\*,5*S*\*)-1-benzyl-2,5-diphenylimidazolidine-4,4-dicarboxylate 20a

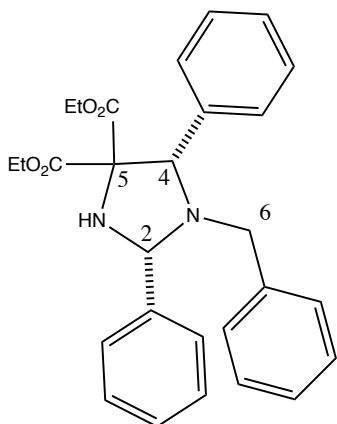

Yield (1.64 g, 65%); White solid; m.p. 145-147°C (lit.<sup>10</sup> 147°C);  $R_f$  (20% EtOAc in Pet. Ether 40:60) 0.63;  $\nu_{\max}/\text{cm}^{-1}$  3307 (N-H), 3063 (C-H), 3030 (C-H), 2985 (C-H), 1728 (C=O); 2.3:1 mixture of 2,4-*cis/trans* diastereomers;  $\delta_{\text{H}}$  (2,4-*cis* diastereomer) (400 MHz,  $\text{CDCl}_3$ ) 0.72 (3H, t,  $J=7.2$  Hz,  $\text{OCH}_2\text{CH}_3$ ), 1.19 (3H, t,  $J=7.1$  Hz,  $\text{OCH}_2\text{CH}_3$ ), 3.32 (1H, dq,  $J=7.2$  Hz, 10.6 Hz,  $\text{OCH}_2\text{CH}_3$ ), 3.52 (1H, br s, H1 or NH), 3.59 (2H, s, H6), 3.79 (1H, m,  $\text{OCH}_2\text{CH}_3$ ), 4.09 (1H, dq,  $J=7.1$  Hz, 10.8 Hz,  $\text{OCH}_2\text{CH}_3$ ), 4.32 (1H, dq,  $J=7.2$  Hz, 10.7 Hz,  $\text{OCH}_2\text{CH}_3$ ), 4.44 (1H, br s, H2), 4.83 (1H, s, H4), 6.87 (2H, m, Ar-H), 7.10-7.47 (9H, m, Ar-H), 7.56 (2H, m, Ar-H), 7.71 (2H, m, Ar-H);  $\delta_{\text{C}}$  (2,4-*cis* diastereomer) (101 MHz,  $\text{CDCl}_3$ ) 13.4 ( $\text{OCH}_2\text{CH}_3$ ), 14.0 ( $\text{OCH}_2\text{CH}_3$ ), 52.0 (C6), 61.8 ( $\text{OCH}_2\text{CH}_3$ ), 62.1 ( $\text{OCH}_2\text{CH}_3$ ), 69.6 (C4), 75.8 (C5), 79.9 (C2), 127.0 (Ar-C), 127.8-127.9 (Ar-C), 128.2 (Ar-C), 128.7 (Ar-C), 129.0 (Ar-C), 130.1 (Ar-C), 134.8 (Ar-C), 138.2 (Ar-C), 138.9 (Ar-C), 169.7 (C=O), 170.2 (C=O); LRMS (ESI<sup>+</sup>)  $m/z$ : 459.2 ( $[\text{M} + \text{H}]^+$  100%); HRMS (ESI<sup>+</sup>)  $m/z$ :  $[\text{M} + \text{H}]^+$  calcd. for  $\text{C}_{28}\text{H}_{31}\text{N}_2\text{O}_4$ , 459.2278, found 459.2272.

### Diethyl 1-benzyl-2,5-bis(4-methylphenyl)imidazolidine-4,4-dicarboxylate 20b

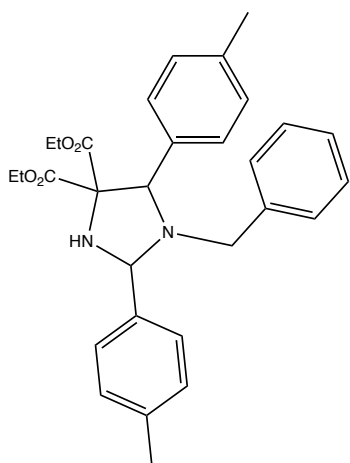

Yield (3.13 g, 58%); Light green oil;  $R_f$  (10% EtOAc in Pet. Ether 40:60) 0.38;  $\nu_{\max}/\text{cm}^{-1}$  2982 (C-H), 1729 (C=O); 1:1.9 mixture of 2,4-*cis/trans* diastereomers;  $\delta_{\text{H}}$  (2,4-*cis* diastereomer) (400 MHz,  $\text{CDCl}_3$ ) 0.74 (3H, t,  $J=7.1$  Hz,  $\text{OCH}_2\text{CH}_3$ ), 1.18 (3H, t,  $J=7.1$  Hz,  $\text{OCH}_2\text{CH}_3$ ), 2.35 (3H, s,  $\text{CH}_3$ ), 2.38 (3H, s,  $\text{CH}_3$ ), 3.37 (1H, dq,  $J=7.1$  Hz, 10.6 Hz,  $\text{OCH}_2\text{CH}_3$ ), 3.52 (1H, br s, H1 or NH), 3.58 (2H, s, H6), 3.80 (1H, m,  $\text{OCH}_2\text{CH}_3$ ), 4.08 (1H, m,  $\text{OCH}_2\text{CH}_3$ ), 4.30 (1H, m,  $\text{OCH}_2\text{CH}_3$ ), 4.41 (1H, m, H2), 4.76 (1H, s, H4), 6.86-7.80 (13H, m, Ar-H);  $\delta_{\text{C}}$  (2,4-*cis* diastereomer) (101 MHz,  $\text{CDCl}_3$ ) 13.3 ( $\text{OCH}_2\text{CH}_3$ ), 14.0 ( $\text{OCH}_2\text{CH}_3$ ), 21.3 ( $\text{CH}_3$ ), 21.4 ( $\text{CH}_3$ ), 51.3 (C6), 61.8 ( $\text{OCH}_2\text{CH}_3$ ), 62.1 ( $\text{OCH}_2\text{CH}_3$ ), 68.9 (C4), 75.7 (C5), 79.2 (C2), 126.8-138.7 (Ar-C), 169.9 (C=O), 170.3 (C=O);  $\delta_{\text{H}}$  (2,4-*trans* diastereomer) (400 MHz,  $\text{CDCl}_3$ ) 0.74 (3H, t,  $J=7.1$  Hz,  $\text{OCH}_2\text{CH}_3$ ), 1.32 (3H, t,  $J=7.1$  Hz,  $\text{OCH}_2\text{CH}_3$ ), 2.34 (6H, s,  $\text{CH}_3$ ,  $\text{CH}_3$ ), 2.95 (1H, d,  $J=14.2$  Hz, H6), 3.46 (1H, d,  $J=14.2$  Hz, H6), 3.80 (2H, m,  $\text{OCH}_2\text{CH}_3$ ), 4.30 (1H, m,  $\text{OCH}_2\text{CH}_3$ ), 4.38 (1H, m,  $\text{OCH}_2\text{CH}_3$ ), 5.07 (1H, s, H4), 5.10

(1H, br s, H2), 6.86-7.80 (13H, m, Ar-H);  $\delta_{\text{C}}$  (2,4-*trans* diastereomer) (101 MHz, CDCl<sub>3</sub>) 13.5 (OCH<sub>2</sub>CH<sub>3</sub>), 14.3 (OCH<sub>2</sub>CH<sub>3</sub>), 21.3 (CH<sub>3</sub>), 21.3 (CH<sub>3</sub>), 49.4 (C6), 61.7 (OCH<sub>2</sub>CH<sub>3</sub>), 62.4 (OCH<sub>2</sub>CH<sub>3</sub>), 67.3 (C4), 75.9 (C5), 79.3 (C2), 126.8-138.7 (Ar-C), 168.8 (C=O), 171.0 (C=O); LRMS (ESI<sup>+</sup>) *m/z*: 487.2 ([M + H]<sup>+</sup> 100%); HRMS (ESI<sup>+</sup>) *m/z*: [M + H]<sup>+</sup> calcd. for C<sub>30</sub>H<sub>35</sub>O<sub>4</sub>N<sub>2</sub>, 487.2591, found 487.2586.

### Diethyl (2*R*\*,5*S*\*)-1-benzyl-2,5-bis(4-methoxyphenyl)imidazolidine-4,4-dicarboxylate 20c

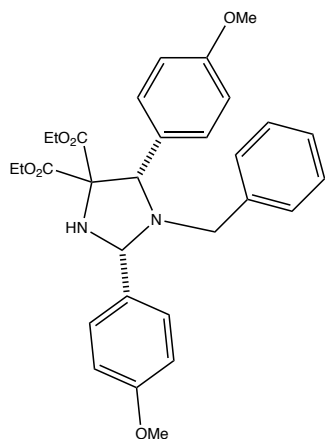

Yield (2.02 g, 70%); Light green oil; R<sub>f</sub> (10% EtOAc in Pet. Ether 40:60) 0.23;  $\nu_{\text{max}}$ /cm<sup>-1</sup> 2981 (C-H), 1729 (C=O), 1610 (N-H); >94:6 mixture of 2,4-*cis/trans* diastereomers;  $\delta_{\text{H}}$  (2,4-*cis* diastereomer) (400 MHz, CDCl<sub>3</sub>) 0.79 (3H, t, *J*=7.1 Hz, OCH<sub>2</sub>CH<sub>3</sub>), 1.19 (3H, t, *J*=7.1 Hz, OCH<sub>2</sub>CH<sub>3</sub>), 3.41 (1H, dq, *J*=7.2 Hz, 10.7 Hz, OCH<sub>2</sub>CH<sub>3</sub>), 3.56 (2H, s, H6), 3.82 (3H, s, OCH<sub>3</sub>), 3.84 (3H, s, OCH<sub>3</sub>), 3.85 (1H, m, OCH<sub>2</sub>CH<sub>3</sub>), 4.08 (1H, m, OCH<sub>2</sub>CH<sub>3</sub>), 4.31 (1H, m, OCH<sub>2</sub>CH<sub>3</sub>), 4.38 (1H, s, H2), 4.74 (1H, s, H4), 6.85-7.86 (13H, m, Ar-H);  $\delta_{\text{C}}$  (2,4-*cis* diastereomer) (101 MHz, CDCl<sub>3</sub>) 13.5 (OCH<sub>2</sub>CH<sub>3</sub>), 14.0 (OCH<sub>2</sub>CH<sub>3</sub>),

51.6 (C6), 55.4 (OCH<sub>3</sub>), 55.5 (OCH<sub>3</sub>), 60.5 (OCH<sub>2</sub>CH<sub>3</sub>), 61.8 (OCH<sub>2</sub>CH<sub>3</sub>), 68.8 (C4), 75.5 (C5), 79.1 (C2), 113.7 (Ar-C), 114.1 (Ar-C), 127.0 (Ar-C), 127.8 (Ar-C), 129.9-130.1 (Ar-C), 131.1 (Ar-C), 132.1 (Ar-C), 134.9 (Ar-C), 159.4 (Ar-C), 160.1 (Ar-C), 169.9 (C=O), 170.3 (C=O); LRMS (ESI<sup>+</sup>) *m/z*: 519.2 ([M + H]<sup>+</sup> 71%); HRMS (ESI<sup>+</sup>) *m/z*: [M + H]<sup>+</sup> calcd. for C<sub>30</sub>H<sub>35</sub>O<sub>6</sub>N<sub>2</sub>, 519.2490, found 519.2488.

### Diethyl 1-benzyl-2,5-bis(4-fluorophenyl)imidazolidine-4,4-dicarboxylate 20d

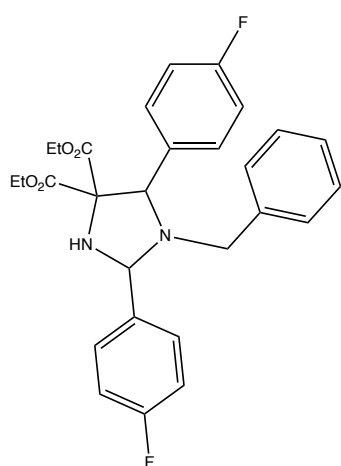

Yield (6.07 g, Quantitative); Light green oil; R<sub>f</sub> (10% EtOAc in Pet. Ether 40:60) 0.30;  $\nu_{\text{max}}$ /cm<sup>-1</sup> 2984 (C-H), 1729 (C=O), 1603 (N-H); 2.9:1 mixture of 2,4-*cis/trans* diastereomers;  $\delta_{\text{H}}$  (2,4-*cis* diastereomer) (400 MHz, CDCl<sub>3</sub>) 0.78 (3H, t, *J*=7.1 Hz, OCH<sub>2</sub>CH<sub>3</sub>), 1.19 (3H, t, *J*=7.1 Hz, OCH<sub>2</sub>CH<sub>3</sub>), 3.40 (1H, m, OCH<sub>2</sub>CH<sub>3</sub>), 3.53 (1H, d, *J*=14.0 Hz, H6), 3.54 (1H, d, *J*=14.0 Hz, H6), 3.81 (1H, m, OCH<sub>2</sub>CH<sub>3</sub>), 4.09 (1H, dq, *J*=7.1 Hz, 10.7 Hz, OCH<sub>2</sub>CH<sub>3</sub>), 4.31 (1H, m, OCH<sub>2</sub>CH<sub>3</sub>), 4.42 (1H, br d, *J*=9.8 Hz, H2), 4.80 (1H, s, H4), 6.80-7.91 (13H, m, Ar-H);  $\delta_{\text{C}}$  (2,4-*cis* diastereomer) (101 MHz, CDCl<sub>3</sub>) 13.4

(OCH<sub>2</sub>CH<sub>3</sub>), 14.0 (OCH<sub>2</sub>CH<sub>3</sub>), 52.7 (C6), 62.0 (OCH<sub>2</sub>CH<sub>3</sub>), 62.3 (OCH<sub>2</sub>CH<sub>3</sub>), 69.5 (C4), 75.7 (C5), 79.8 (C2), 114.9-

139.3 (Ar-C), 162.6 (d,  $J=246.3$  Hz, Ar-C), 163.2 (d,  $J=247.1$  Hz, Ar-C), 169.6 (C=O), 170.0 (C=O);  $\delta_{\text{H}}$  (*2,4-trans* diastereomer) (400 MHz, CDCl<sub>3</sub>) 0.78 (3H, t,  $J=7.1$  Hz, OCH<sub>2</sub>CH<sub>3</sub>), 1.29 (3H, t,  $J=7.1$  Hz, OCH<sub>2</sub>CH<sub>3</sub>), 2.92 (1H, d,  $J=14.2$  Hz, H<sub>6</sub>), 3.45 (1H, d,  $J=14.3$  Hz, H<sub>6</sub>), 3.82 (2H, m, OCH<sub>2</sub>CH<sub>3</sub>), 4.32 (2H, m, OCH<sub>2</sub>CH<sub>3</sub>), 5.09 (1H, s, H<sub>4</sub>), 5.12 (1H, s, H<sub>2</sub>), 6.80-7.91 (13H, m, Ar-H);  $\delta_{\text{C}}$  (*2,4-trans* diastereomer) (101 MHz, CDCl<sub>3</sub>) 13.5 (OCH<sub>2</sub>CH<sub>3</sub>), 14.2 (OCH<sub>2</sub>CH<sub>3</sub>), 49.6 (C<sub>6</sub>), 61.9 (OCH<sub>2</sub>CH<sub>3</sub>), 62.5 (OCH<sub>2</sub>CH<sub>3</sub>), 66.9 (C<sub>4</sub>), 75.7 (C<sub>5</sub>), 78.7 (C<sub>2</sub>), 114.9-139.3 (Ar-C), 162.7 (d,  $J=246.8$  Hz, Ar-C), 163.0 (d,  $J=246.7$  Hz, Ar-C), 168.6 (C=O), 170.7 (C=O); LRMS (ESI<sup>+</sup>)  $m/z$ : 517.2 ([M + Na]<sup>+</sup> 6%); HRMS (ESI<sup>+</sup>)  $m/z$ : [M + H]<sup>+</sup> calcd. for C<sub>28</sub>H<sub>29</sub>O<sub>4</sub>N<sub>2</sub>F<sub>2</sub>, 495.2101, found 495.2089.

### Diethyl 1-benzyl-2,5-bis(4-chlorophenyl)imidazolidine-4,4-dicarboxylate 20e

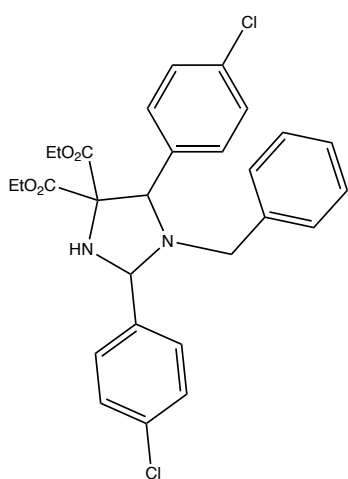

Yield (2.53 g, Quantitative); Colourless oil; R<sub>f</sub> (30% EtOAc in Pet. Ether 40:60)

0.65 and 0.78;  $\nu_{\text{max}}$ /cm<sup>-1</sup> 3304 (N-H), 2983 (C-H), 1730 (C=O); 1:2.3 mixture of

2,4-*cis/trans* diastereomers;  $\delta_{\text{H}}$  (*2,4-cis* diastereomer) (400 MHz, CDCl<sub>3</sub>) 0.79 (3H, t,  $J=7.2$

Hz, OCH<sub>2</sub>CH<sub>3</sub>), 1.20 (3H, t,  $J=7.1$  Hz, OCH<sub>2</sub>CH<sub>3</sub>), 3.42 (1H, dq,  $J=7.2$  Hz, 10.7 Hz,

OCH<sub>2</sub>CH<sub>3</sub>), 3.53 (1H, d,  $J=14.0$  Hz, H<sub>6</sub>), 3.57 (1H, d,  $J=14.0$  Hz, H<sub>6</sub>), 3.84 (1H, dq,

$J=7.2$  Hz, 10.8 Hz, OCH<sub>2</sub>CH<sub>3</sub>), 4.11 (1H, m, OCH<sub>2</sub>CH<sub>3</sub>), 4.32 (1H, m, OCH<sub>2</sub>CH<sub>3</sub>), 4.42

(1H, br s, H<sub>2</sub>), 4.79 (1H, s, H<sub>4</sub>), 6.80-7.62 (13H, m, Ar-H);  $\delta_{\text{C}}$  (*2,4-cis* diastereomer) (101

MHz, CDCl<sub>3</sub>) 13.4 (OCH<sub>2</sub>CH<sub>3</sub>), 14.0 (OCH<sub>2</sub>CH<sub>3</sub>), 52.7 (C<sub>6</sub>), 62.1 (OCH<sub>2</sub>CH<sub>3</sub>), 62.4 (OCH<sub>2</sub>CH<sub>3</sub>), 69.4 (C<sub>4</sub>), 75.7 (C<sub>5</sub>),

79.8 (C<sub>2</sub>), 127.3 (Ar-C), 128.0 (Ar-C), 128.4 (Ar-C), 129.0 (Ar-C), 130.0 (Ar-C), 130.1 (Ar-C), 130.3 (Ar-C), 133.7

(Ar-C), 134.8 (Ar-C), 134.8 (Ar-C), 136.7 (Ar-C), 137.5 (Ar-C), 169.5 (C=O), 170.0 (C=O);  $\delta_{\text{H}}$  (*2,4-trans* diastereomer) (400

MHz, CDCl<sub>3</sub>) 0.80 (3H, t,  $J=7.1$  Hz, OCH<sub>2</sub>CH<sub>3</sub>), 1.30 (3H, t,  $J=7.1$  Hz, OCH<sub>2</sub>CH<sub>3</sub>), 2.93 (1H, d,  $J=14.2$  Hz, H<sub>6</sub>), 3.46

(1H, d,  $J=14.3$  Hz, H<sub>6</sub>), 3.82 (2H, m, OCH<sub>2</sub>CH<sub>3</sub>), 4.33 (2H, m, OCH<sub>2</sub>CH<sub>3</sub>), 5.08 (1H, s, H<sub>4</sub>), 5.11 (1H, br s, H<sub>2</sub>), 7.10-

7.85 (13H, m, Ar-H);  $\delta_{\text{C}}$  (*2,4-trans* diastereomer) (101 MHz, CDCl<sub>3</sub>) 13.6 (OCH<sub>2</sub>CH<sub>3</sub>), 14.2 (OCH<sub>2</sub>CH<sub>3</sub>), 49.7 (C<sub>6</sub>), 62.0

(OCH<sub>2</sub>CH<sub>3</sub>), 62.6 (OCH<sub>2</sub>CH<sub>3</sub>), 67.0 (C<sub>4</sub>), 75.7 (C<sub>5</sub>), 78.7 (C<sub>2</sub>), 127.2-139.5 (Ar-C), 168.6 (C=O), 170.6 (C=O); LRMS

(ESI<sup>+</sup>)  $m/z$ : 527.1 ([M<sup>35+35</sup> + H]<sup>+</sup> 100%), 529.1 ([M<sup>35+37</sup> + H]<sup>+</sup> 90%), 531.1 ([M<sup>37+37</sup> + H]<sup>+</sup> 40%); HRMS (ESI<sup>+</sup>)  $m/z$ :

[M<sup>35+35</sup> + H]<sup>+</sup> calcd. for C<sub>28</sub>H<sub>29</sub>O<sub>4</sub>N<sub>2</sub>Cl<sub>2</sub>, 527.1475, found 527.1488; [M<sup>35+37</sup> + H]<sup>+</sup> calcd. for C<sub>28</sub>H<sub>29</sub>O<sub>4</sub>N<sub>2</sub>Cl<sub>2</sub>, 529.1448,

found 529.1462; [M<sup>37+37</sup> + H]<sup>+</sup> calcd. for C<sub>28</sub>H<sub>29</sub>O<sub>4</sub>N<sub>2</sub>Cl<sub>2</sub>, 531.1428, found 531.1424.

### Diethyl 1-benzyl-2,5-bis(4-bromophenyl)imidazolidine-4,4-dicarboxylate 20f

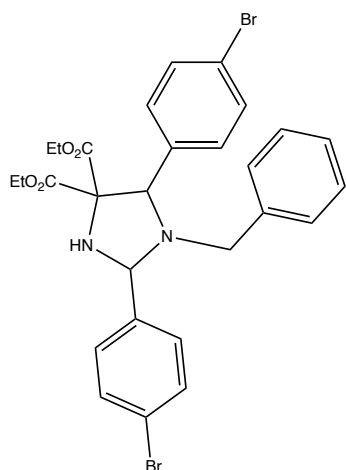

Yield (6.57 g, 96%); Light green oil;  $R_f$  (20% EtOAc in Pet. Ether 40:60) 0.38 and 0.35;  $\nu_{\max}/\text{cm}^{-1}$  2981 (C-H), 1729 (C=O), 1645 (N-H); 1:2.6 mixture of 2,4-*cis/trans* diastereomers;  $\delta_{\text{H}}$  (2,4-*cis* diastereomer) (400 MHz,  $\text{CDCl}_3$ ) 0.80 (3H, t,  $J=7.1$  Hz,  $\text{OCH}_2\text{CH}_3$ ), 1.21 (3H, t,  $J=7.1$  Hz,  $\text{OCH}_2\text{CH}_3$ ), 3.46 (1H, m,  $\text{OCH}_2\text{CH}_3$ ), 3.53 (1H, d,  $J=14.0$  Hz, H6), 3.58 (1H, d,  $J=13.9$  Hz, H6), 3.83 (1H, m,  $\text{OCH}_2\text{CH}_3$ ), 4.12 (1H, m,  $\text{OCH}_2\text{CH}_3$ ), 4.32 (1H, m,  $\text{OCH}_2\text{CH}_3$ ), 4.42 (1H, br m, H2), 4.78 (1H, s, H4), 6.81-7.77 (13H, m, Ar-H);  $\delta_{\text{C}}$  (2,4-*cis* diastereomer) (101 MHz,  $\text{CDCl}_3$ ) 13.4 ( $\text{OCH}_2\text{CH}_3$ ), 14.0 ( $\text{OCH}_2\text{CH}_3$ ), 52.6 (C6), 62.1 ( $\text{OCH}_2\text{CH}_3$ ), 62.4 ( $\text{OCH}_2\text{CH}_3$ ), 69.5 (C4), 75.7 (C5), 79.8 (C2), 121.8-140.0 (Ar-C), 169.5 (C=O), 169.9 (C=O);  $\delta_{\text{H}}$  (2,4-*trans* diastereomer) (400 MHz,  $\text{CDCl}_3$ ) 0.80 (3H, t,  $J=7.1$  Hz,  $\text{OCH}_2\text{CH}_3$ ), 1.31 (3H, t,  $J=7.1$  Hz,  $\text{OCH}_2\text{CH}_3$ ), 2.94 (1H, d,  $J=14.3$  Hz, H6), 3.46 (1H, d,  $J=14.3$  Hz, H6), 3.83 (2H, m,  $\text{OCH}_2\text{CH}_3$ ), 4.32 (2H, m,  $\text{OCH}_2\text{CH}_3$ ), 5.07 (1H, s, H4), 5.10 (1H, br s, H2), 6.81-7.77 (13H, m, Ar-H);  $\delta_{\text{C}}$  (2,4-*trans* diastereomer) (101 MHz,  $\text{CDCl}_3$ ) 13.6 ( $\text{OCH}_2\text{CH}_3$ ), 14.2 ( $\text{OCH}_2\text{CH}_3$ ), 49.7 (C6), 62.0 ( $\text{OCH}_2\text{CH}_3$ ), 62.6 ( $\text{OCH}_2\text{CH}_3$ ), 67.0 (C4), 75.7 (C5), 78.8 (C2), 121.8-140.0 (Ar-C), 168.5 (C=O), 170.6 (C=O); LRMS (ESI<sup>+</sup>)  $m/z$ : 615.8 ( $[\text{M}^{79+79} + \text{H}]^+$  60%), 617.8 ( $[\text{M}^{79+81} + \text{H}]^+$  100%), 619.8 ( $[\text{M}^{81+81} + \text{H}]^+$  62%); HRMS (ESI<sup>+</sup>)  $m/z$ :  $[\text{M}^{79+79} + \text{H}]^+$  calcd. for  $\text{C}_{28}\text{H}_{29}\text{O}_4\text{N}_2\text{Br}_2$ , 615.0500, found 615.0481;  $[\text{M}^{79+81} + \text{H}]^+$  calcd. for  $\text{C}_{28}\text{H}_{29}\text{O}_4\text{N}_2\text{Br}_2$ , 617.0479, found 617.0464;  $[\text{M}^{81+81} + \text{H}]^+$  calcd. for  $\text{C}_{28}\text{H}_{29}\text{O}_4\text{N}_2\text{Br}_2$ , 619.0459, found 619.0442.

### Diethyl 1-benzyl-2,5-di(naphthalen-1-yl)imidazolidine-4,4-dicarboxylate 20g

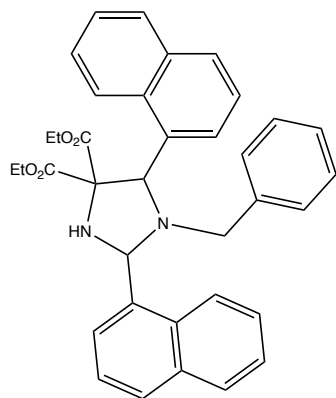

Yield (1.65 g, 62%); Foamy white solid; m.p. 65-68°C;  $R_f$  (20% EtOAc in Pet. Ether 40:60) 0.63 and 0.53;  $\nu_{\max}/\text{cm}^{-1}$  3299 (N-H), 3060 (C-H), 2982 (C-H), 1728 (C=O); 1:3 mixture of 2,4-*cis/trans* diastereomers;  $\delta_{\text{H}}$  (2,4-*cis* diastereomer) (400 MHz,  $\text{CDCl}_3$ ) 0.20 (3H, t,  $J=7.2$  Hz,  $\text{OCH}_2\text{CH}_3$ ), 1.27 (3H, t,  $J=7.1$  Hz,  $\text{OCH}_2\text{CH}_3$ ), 2.84 (1H, dq,  $J=7.2$  Hz, 10.6 Hz,  $\text{OCH}_2\text{CH}_3$ ), 3.47 (1H, m,  $\text{OCH}_2\text{CH}_3$ ), 3.79 (1H, m, H6), 3.82 (1H, d,  $J=13.8$  Hz, H6), 4.22 (1H, m,  $\text{OCH}_2\text{CH}_3$ ), 4.41 (1H, dq,  $J=7.1$  Hz, 10.6 Hz,  $\text{OCH}_2\text{CH}_3$ ), 5.42 (1H, d,  $J=11.3$  Hz, H2), 5.98 (1H, s, H4), 6.80-8.57 (19H, m, Ar-H);  $\delta_{\text{C}}$  (2,4-*cis* diastereomer) (101 MHz,  $\text{CDCl}_3$ ) 12.9 ( $\text{OCH}_2\text{CH}_3$ ), 14.0 ( $\text{OCH}_2\text{CH}_3$ ), 50.8 (C6), 61.5 ( $\text{OCH}_2\text{CH}_3$ ), 62.3 ( $\text{OCH}_2\text{CH}_3$ ), 63.8 (C4), 76.4 (C2), 123.6-138.7 (Ar-C),

168.3 (C=O), 170.8 (C=O);  $\delta_{\text{H}}$  (2,4-*trans* diastereomer) (400 MHz, CDCl<sub>3</sub>) 0.26 (3H, t,  $J=7.1$  Hz, OCH<sub>2</sub>CH<sub>3</sub>), 1.11 (3H, t,  $J=7.1$  Hz, OCH<sub>2</sub>CH<sub>3</sub>), 3.31 (1H, d,  $J=14.1$  Hz, H6), 3.47 (2H, m, OCH<sub>2</sub>CH<sub>3</sub>), 3.58 (1H, br s, NH), 3.74 (1H, d,  $J=14.1$  Hz, H6), 4.22 (2H, m, OCH<sub>2</sub>CH<sub>3</sub>), 6.22 (1H, s, H2), 6.42 (1H, s, H4), 6.80-8.57 (19H, m, Ar-H);  $\delta_{\text{C}}$  (2,4-*trans* diastereomer) (101 MHz, CDCl<sub>3</sub>) 12.6 (OCH<sub>2</sub>CH<sub>3</sub>), 14.1 (OCH<sub>2</sub>CH<sub>3</sub>), 53.3 (C6), 61.2 (C4), 61.6 (OCH<sub>2</sub>CH<sub>3</sub>), 62.2 (OCH<sub>2</sub>CH<sub>3</sub>), 76.5 (C2), 123.6-138.7 (Ar-C), 168.6 (C=O), 170.4 (C=O); LRMS (ESI<sup>+</sup>)  $m/z$ : 559.2 ([M + H]<sup>+</sup> 100%); HRMS (ESI<sup>+</sup>)  $m/z$ : [M + H]<sup>+</sup> calcd. for C<sub>36</sub>H<sub>35</sub>N<sub>2</sub>O<sub>4</sub>, 559.2591, found 559.2587.

### Diethyl 1-benzyl-2,5-bis(4-nitrophenyl)imidazolidine-4,4-dicarboxylate 20h

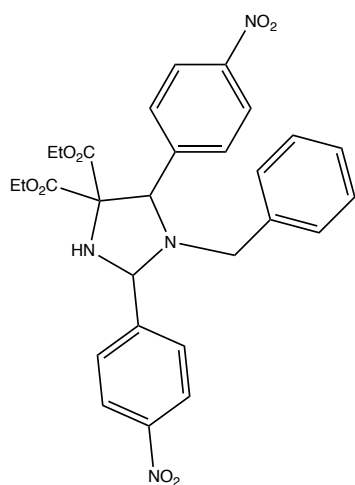

Yield (4.33 g, 83%); Yellow oil; R<sub>f</sub> (20% EtOAc in Pet. Ether 40:60) 0.30 and 0.20;  $\nu_{\text{max}}/\text{cm}^{-1}$  3310 (N-H), 2983 (C-H), 1731 (C=O), 1603 (N-H); 1:1.1 mixture of 2,4-*cis/trans* diastereomers;  $\delta_{\text{H}}$  (2,4-*cis* diastereomer) (400 MHz, CDCl<sub>3</sub>) 0.76 (3H, t,  $J=7.1$  Hz, OCH<sub>2</sub>CH<sub>3</sub>), 1.23 (3H, t,  $J=7.2$  Hz, OCH<sub>2</sub>CH<sub>3</sub>), 3.37 (1H, dq,  $J=7.2$  Hz, 10.8 Hz, OCH<sub>2</sub>CH<sub>3</sub>), 3.48 (1H, br s, NH), 3.55 (1H, d,  $J=13.6$  Hz, H6), 3.59 (1H, d,  $J=13.6$  Hz, H6), 3.84 (1H, dq,  $J=7.1$  Hz, 10.7 Hz, OCH<sub>2</sub>CH<sub>3</sub>), 4.16 (1H, dq,  $J=7.1$  Hz, 10.6 Hz, OCH<sub>2</sub>CH<sub>3</sub>), 4.36 (1H, dq,  $J=7.1$  Hz, 10.7 Hz, OCH<sub>2</sub>CH<sub>3</sub>), 4.62 (1H, br s, H2), 4.97 (1H, s, H4), 6.81 (2H, m, Ar-H), 7.03 (3H, m, Ar-H), 7.69 (2H, d,  $J=8.7$  Hz, Ar-H),

7.82 (2H, d,  $J=8.6$  Hz, Ar-H), 8.14 (2H, d,  $J=8.8$  Hz, Ar-H), 8.20 (2H, d,  $J=8.8$  Hz, Ar-H);  $\delta_{\text{C}}$  (2,4-*cis* diastereomer) (101 MHz, CDCl<sub>3</sub>) 13.5 (OCH<sub>2</sub>CH<sub>3</sub>), 14.0 (OCH<sub>2</sub>CH<sub>3</sub>), 54.5 (C6), 62.6 (OCH<sub>2</sub>CH<sub>3</sub>), 62.6 (OCH<sub>2</sub>CH<sub>3</sub>), 70.5 (C4), 76.1 (C5), 80.7 (C2), 123.3 (Ar-C), 123.9 (Ar-C), 127.7 (Ar-C), 128.1 (Ar-C), 129.6 (Ar-C), 129.7 (Ar-C), 129.8 (Ar-C), 134.8 (Ar-C), 145.9 (Ar-C), 146.0 (Ar-C), 147.7 (Ar-C), 148.5 (Ar-C), 168.9 (C=O), 169.5 (C=O);  $\delta_{\text{H}}$  (2,4-*trans* diastereomer) (400 MHz, CDCl<sub>3</sub>) 0.76 (3H, t,  $J=7.1$  Hz, OCH<sub>2</sub>CH<sub>3</sub>), 1.30 (3H, t,  $J=7.2$  Hz, OCH<sub>2</sub>CH<sub>3</sub>), 2.95 (1H, d,  $J=14.3$  Hz, H6), 3.48 (1H, m, H6), 3.85 (2H, m, OCH<sub>2</sub>CH<sub>3</sub>), 4.33 (2H, m, OCH<sub>2</sub>CH<sub>3</sub>), 5.25 (1H, s, H4), 5.33 (1H, d,  $J=5.1$  Hz, H2), 6.79-8.46 (13H, m, Ar-H);  $\delta_{\text{C}}$  (2,4-*trans* diastereomer) (101 MHz, CDCl<sub>3</sub>) 13.6 (OCH<sub>2</sub>CH<sub>3</sub>), 14.2 (OCH<sub>2</sub>CH<sub>3</sub>), 50.1 (C6), 62.4 (OCH<sub>2</sub>CH<sub>3</sub>), 62.9 (OCH<sub>2</sub>CH<sub>3</sub>), 67.2 (C4), 75.7 (C5), 78.4 (C2), 123.3-148.5 (Ar-C), 168.2 (C=O), 170.0 (C=O); LRMS (ESI<sup>+</sup>)  $m/z$ : 548.2 ([M]<sup>+</sup> 6%); HRMS (ESI<sup>+</sup>)  $m/z$ : [M + H]<sup>+</sup> calcd. for C<sub>28</sub>H<sub>29</sub>O<sub>8</sub>N<sub>4</sub>, 549.1980, found 549.1977.

### Diethyl 1-benzyl-2,5-bis(4-(trifluoromethyl)phenyl)imidazolidine-4,4-dicarboxylate 20i

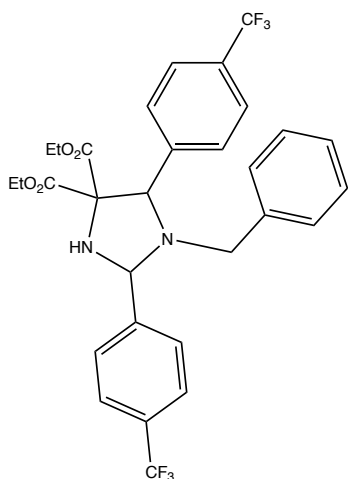

Yield (2.25 g, 80%, contaminated with side-products); Colourless oil;  $R_f$  (20% EtOAc in Pet. Ether 40:60) 0.78 and 0.53;  $\nu_{\max}/\text{cm}^{-1}$  2986 (C-H), 1732 (C=O), 1620 (N-H); 1:2.4 mixture of 2,4-*cis/trans* diastereomers;  $\delta_{\text{H}}$  (2,4-*cis* diastereomer) (400 MHz,  $\text{CDCl}_3$ ) 0.76 (3H, m,  $\text{OCH}_2\text{CH}_3$ ), 1.22 (3H, t,  $J=7.1$  Hz,  $\text{OCH}_2\text{CH}_3$ ), 3.55 (1H, d,  $J=14.1$  Hz, H6), 3.55 (1H, m,  $\text{OCH}_2\text{CH}_3$ ), 3.61 (1H, d,  $J=13.8$  Hz, H6), 3.80 (1H, m,  $\text{OCH}_2\text{CH}_3$ ), 4.16 (1H, m,  $\text{OCH}_2\text{CH}_3$ ), 4.35 (1H, m,  $\text{OCH}_2\text{CH}_3$ ), 4.55 (1H, s, H2), 4.92 (1H, s, H4), 6.80-8.04 (13H, m, Ar-H);  $\delta_{\text{H}}$  (2,4-*trans* diastereomer) (400 MHz,  $\text{CDCl}_3$ ) 0.75 (3H, m,  $\text{OCH}_2\text{CH}_3$ ), 1.32 (3H, t,  $J=7.1$  Hz,  $\text{OCH}_2\text{CH}_3$ ), 2.96 (1H, d,  $J=14.3$  Hz, H6), 3.51 (1H, d,  $J=14.3$  Hz, H6), 3.80 (2H, m,  $\text{OCH}_2\text{CH}_3$ ), 4.35 (2H, m,  $\text{OCH}_2\text{CH}_3$ ), 5.21 (1H, s, H4), 5.27 (1H, s, H2), 6.80-8.04 (13H, m, Ar-H);  $\delta_{\text{C}}$  (2,4-*trans* diastereomer) (101 MHz,  $\text{CDCl}_3$ ) 13.4 ( $\text{OCH}_2\text{CH}_3$ ), 14.2 ( $\text{OCH}_2\text{CH}_3$ ), 49.9 (C6), 62.2 ( $\text{OCH}_2\text{CH}_3$ ), 62.7 ( $\text{OCH}_2\text{CH}_3$ ), 67.3 (C4), 75.9 (C5), 78.8 (C2), 122.8-144.9 (Ar-C), 168.5 (C=O), 170.4 (C=O); LRMS (ESI<sup>+</sup>)  $m/z$ : 594.2 ([M]<sup>+</sup> 30%); HRMS (ESI<sup>+</sup>)  $m/z$ : [M + H]<sup>+</sup> calcd. for  $\text{C}_{30}\text{H}_{29}\text{O}_4\text{N}_2\text{F}_6$ , 595.2026, found 595.2021.

#### Diethyl 1-benzyl-2,5-bis(4-cyanophenyl)imidazolidine-4,4-dicarboxylate 20j

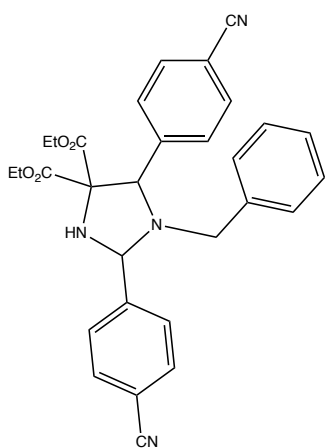

Yield (945 mg, 77%); White crystals/colourless oil; m.p. 55-58°C;  $R_f$  (20% EtOAc in Pet. Ether 40:60) 0.20 and 0.13;  $\nu_{\max}/\text{cm}^{-1}$  3327 (N-H), 2984 (C-H), 2228 ( $\text{C}\equiv\text{N}$ ), 1730 (C=O), 1609 (N-H); 1.9:1 mixture of 2,4-*cis/trans* diastereomers;  $\delta_{\text{H}}$  (2,4-*cis* diastereomer) (400 MHz,  $\text{CDCl}_3$ ) 0.77 (3H, m,  $\text{OCH}_2\text{CH}_3$ ), 1.22 (3H, t,  $J=7.1$  Hz,  $\text{OCH}_2\text{CH}_3$ ), 3.36 (1H, dq,  $J=7.2$  Hz, 10.7 Hz,  $\text{OCH}_2\text{CH}_3$ ), 3.52 (1H, d,  $J=13.6$  Hz, H6), 3.58 (1H, d,  $J=13.6$  Hz, H6), 3.85 (1H, m,  $\text{OCH}_2\text{CH}_3$ ), 4.15 (1H, dq,  $J=7.1$  Hz, 10.7 Hz,  $\text{OCH}_2\text{CH}_3$ ), 4.34 (1H, m,  $\text{OCH}_2\text{CH}_3$ ), 4.54 (1H, br d,  $J=9.8$  Hz, H2), 4.90 (1H, s, H4), 6.78-7.77 (13H, m, Ar-H);  $\delta_{\text{C}}$  (2,4-*cis* diastereomer) (101 MHz,  $\text{CDCl}_3$ ) 13.4 ( $\text{OCH}_2\text{CH}_3$ ), 14.0 ( $\text{OCH}_2\text{CH}_3$ ), 54.3 (C6), 62.5 ( $\text{OCH}_2\text{CH}_3$ ), 62.6 ( $\text{OCH}_2\text{CH}_3$ ), 70.6 (C4), 76.0 (C5), 80.9 (C2), 111.8-146.0 (Ar-C), 169.0 (C=O), 169.5 (C=O);  $\delta_{\text{H}}$  (2,4-*trans* diastereomer) (400 MHz,  $\text{CDCl}_3$ ) 0.78 (3H, m,  $\text{OCH}_2\text{CH}_3$ ), 1.29 (3H, t,  $J=7.1$  Hz,  $\text{OCH}_2\text{CH}_3$ ), 2.93 (1H, d,  $J=14.3$  Hz, H6), 3.49 (1H, d,  $J=14.2$  Hz, H6), 3.84 (2H, m,  $\text{OCH}_2\text{CH}_3$ ), 4.34 (2H, m,  $\text{OCH}_2\text{CH}_3$ ), 5.18 (1H, s, H4), 5.25 (1H, br d,  $J=5.0$  Hz, H2), 6.78-7.77 (13H, m, Ar-H);  $\delta_{\text{C}}$  (2,4-*trans* diastereomer) (101 MHz,  $\text{CDCl}_3$ ) 13.5 ( $\text{OCH}_2\text{CH}_3$ ), 14.2 ( $\text{OCH}_2\text{CH}_3$ ), 50.1 (C6), 62.3



(OCH<sub>2</sub>CH<sub>3</sub>), 62.8 (OCH<sub>2</sub>CH<sub>3</sub>), 67.4 (C4), 75.7 (C5), 78.7 (C2), 111.8-146.0 (Ar-C), 168.3 (C=O), 170.1 (C=O); LRMS (ESI<sup>+</sup>) *m/z*: 509.2 ([M + H]<sup>+</sup> 68%); HRMS (ESI<sup>-</sup>) *m/z*: [M – H]<sup>-</sup> calcd. for C<sub>30</sub>H<sub>27</sub>O<sub>4</sub>N<sub>4</sub>, 507.2027, found 507.2025.

### Diethyl 1-benzyl-2,5-bis(3-bromophenyl)imidazolidine-4,4-dicarboxylate 20k

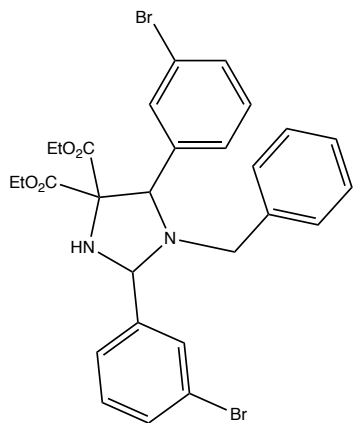

Yield (1.01 g, 69%); Colourless oil; R<sub>f</sub> (20% EtOAc in Pet. Ether 40:60) 0.50;  $\nu_{\max}/\text{cm}^{-1}$  3315 (N-H), 2982 (C-H), 1730 (C=O); 1:2.2 mixture of 2,4-*cis/trans* diastereomers;  $\delta_{\text{H}}$  (2,4-*cis* diastereomer) (400 MHz, CDCl<sub>3</sub>) 0.85 (3H, m, OCH<sub>2</sub>CH<sub>3</sub>), 1.22 (3H, t, *J*=7.1 Hz, OCH<sub>2</sub>CH<sub>3</sub>), 3.45 (1H, m, OCH<sub>2</sub>CH<sub>3</sub>), 3.60 (2H, m, H6), 3.84 (1H, m, OCH<sub>2</sub>CH<sub>3</sub>), 4.12 (1H, dq, *J*=7.1 Hz, 10.7 Hz, OCH<sub>2</sub>CH<sub>3</sub>), 4.34 (1H, m, OCH<sub>2</sub>CH<sub>3</sub>), 4.34 (1H, underneath OCH<sub>2</sub>CH<sub>3</sub> peaks, H2), 4.77 (1H, s, H4), 6.85-7.80 (13H, m, Ar-H);  $\delta_{\text{C}}$  (2,4-*cis* diastereomer) (101 MHz, CDCl<sub>3</sub>) 13.5 (OCH<sub>2</sub>CH<sub>3</sub>), 14.0 (OCH<sub>2</sub>CH<sub>3</sub>), 53.2

(C6), 62.2 (OCH<sub>2</sub>CH<sub>3</sub>), 62.4 (OCH<sub>2</sub>CH<sub>3</sub>), 69.8 (C4), 75.8 (C5), 80.2 (C2), 122.5-143.5 (Ar-C), 169.2 (C=O), 169.8 (C=O);  $\delta_{\text{H}}$  (2,4-*trans* diastereomer) (400 MHz, CDCl<sub>3</sub>) 0.80 (3H, m, OCH<sub>2</sub>CH<sub>3</sub>), 1.32 (3H, t, *J*=7.1 Hz, OCH<sub>2</sub>CH<sub>3</sub>), 2.98 (1H, d, *J*=14.1 Hz, H6), 3.52 (1H, d, *J*=14.1 Hz, H6), 3.84 (2H, m, OCH<sub>2</sub>CH<sub>3</sub>), 4.34 (2H, m, OCH<sub>2</sub>CH<sub>3</sub>), 5.05 (1H, s, H4), 5.13 (1H, br d, *J*=3.2 Hz, H2), 6.85-7.80 (13H, m, Ar-H);  $\delta_{\text{C}}$  (2,4-*trans* diastereomer) (101 MHz, CDCl<sub>3</sub>) 13.5 (OCH<sub>2</sub>CH<sub>3</sub>), 14.2 (OCH<sub>2</sub>CH<sub>3</sub>), 50.0 (C6), 62.1 (OCH<sub>2</sub>CH<sub>3</sub>), 62.7 (OCH<sub>2</sub>CH<sub>3</sub>), 67.3 (C4), 75.8 (C5), 78.9 (C2), 122.5-143.5 (Ar-C), 168.5 (C=O), 170.4 (C=O); LRMS (ESI<sup>+</sup>) *m/z*: 616.0 ([M<sup>79+81</sup>]<sup>+</sup> 29%); HRMS (ESI<sup>-</sup>) *m/z*: [M<sup>79+79</sup> – H]<sup>-</sup> calcd. for C<sub>28</sub>H<sub>27</sub>O<sub>4</sub>N<sub>2</sub>Br<sub>2</sub>, 613.0332, found 613.0330; [M<sup>79+81</sup> – H]<sup>-</sup> calcd. for C<sub>28</sub>H<sub>27</sub>O<sub>4</sub>N<sub>2</sub>Br<sub>2</sub>, 615.0313, found 615.0320; [M<sup>81+81</sup> – H]<sup>-</sup> calcd. for C<sub>28</sub>H<sub>27</sub>O<sub>4</sub>N<sub>2</sub>Br<sub>2</sub>, 617.0297, found 617.0452.

### Diethyl (2*R*\*,5*S*\*)-1-benzyl-2,5-bis(2-fluorophenyl)imidazolidine-4,4-dicarboxylate 20l

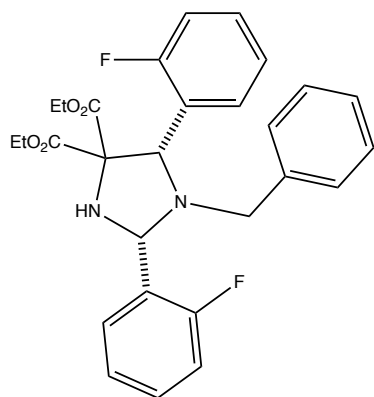

Yield (922 mg, 78%); Pale yellow oil; R<sub>f</sub> (30% EtOAc in Pet. Ether 40:60) 0.68;  $\nu_{\max}/\text{cm}^{-1}$  3306 (N-H), 2983 (C-H), 1732 (C=O), 1616 (N-H); >19:1 mixture of 2,4-*cis/trans* diastereomers;  $\delta_{\text{H}}$  (2,4-*cis* diastereomer) (400 MHz, CDCl<sub>3</sub>) 0.81 (3H, t, *J*=7.1 Hz, OCH<sub>2</sub>CH<sub>3</sub>), 1.24 (3H, t, *J*=7.1 Hz, OCH<sub>2</sub>CH<sub>3</sub>), 3.39 (1H, br s, OCH<sub>2</sub>CH<sub>3</sub>), 3.63 (2H, s, H6), 3.68 (1H, br d, *J*=10.9 Hz, NH), 3.81 (1H, dq, *J*=7.1 Hz, 10.7 Hz, OCH<sub>2</sub>CH<sub>3</sub>), 4.18 (1H, m, OCH<sub>2</sub>CH<sub>3</sub>), 4.37 (1H, dq, *J*=7.2 Hz, 10.8 Hz, OCH<sub>2</sub>CH<sub>3</sub>),

4.92 (1H, br d,  $J=10.2$  Hz, H2), 5.30 (1H, br s, H4), 6.90-7.90 (13H, m, Ar-H);  $\delta_c$  (*2,4-cis* diastereomer) (101 MHz, CDCl<sub>3</sub>) 13.4 (OCH<sub>2</sub>CH<sub>3</sub>), 14.0 (OCH<sub>2</sub>CH<sub>3</sub>), 54.5 (C6), 62.1 (OCH<sub>2</sub>CH<sub>3</sub>), 62.3 (OCH<sub>2</sub>CH<sub>3</sub>), 73.9 (d,  $J=3.4$  Hz, C2), 76.0 (C5), 114.9 (d,  $J=21.9$  Hz, Ar-C), 115.7 (d,  $J=21.8$  Hz, Ar-C), 123.8 (d,  $J=3.5$  Hz, Ar-C), 124.7 (d,  $J=3.5$  Hz, Ar-C), 125.8 (d,  $J=11.5$  Hz, Ar-C), 126.7 (d,  $J=12.1$  Hz, Ar-C), 127.0 (Ar-C), 127.8 (Ar-C), 129.1-129.2 (Ar-C), 129.6 (Ar-C), 130.4 (d,  $J=8.4$  Hz, Ar-C), 161.5 (d,  $J=248.8$  Hz, Ar-C), 161.7 (d,  $J=248.7$  Hz, Ar-C), 168.7 (C=O), 169.4 (C=O);  $\delta_f$  (*2,4-cis* diastereomer) (377 MHz, CDCl<sub>3</sub>) -116.95, -118.74; LRMS (ESI<sup>+</sup>)  $m/z$ : 495.2 ([M + H]<sup>+</sup> 100%); HRMS (ESI<sup>+</sup>)  $m/z$ : [M + H]<sup>+</sup> calcd. for C<sub>28</sub>H<sub>29</sub>O<sub>4</sub>N<sub>2</sub>F<sub>2</sub>, 495.2090, found 495.2086.

### Diethyl (2*R*\*,5*S*\*)-1-(4-(*tert*-butyl)phenyl)-2,5-diphenylimidazolidine-4,4-dicarboxylate **25**

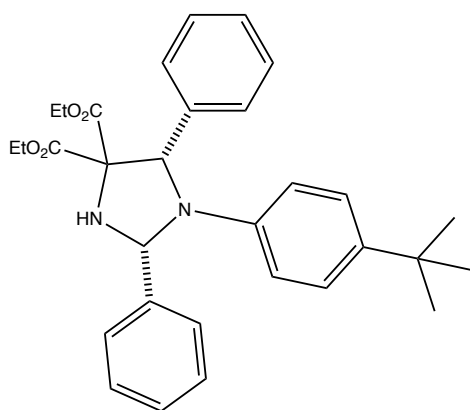

Yield (4.47 g, 56%); Yellow solid; m.p. 61-63°C; R<sub>f</sub> (20% EtOAc in Pet. Ether 40:60) 0.68;  $\nu_{max}/cm^{-1}$  3314 (N-H), 2962 (C-H), 1734 (C=O), 1614 (N-H); 4:1 mixture of *2,4-cis/trans* diastereomers;  $\delta_H$  (*2,4-cis* diastereomer) (400 MHz, CDCl<sub>3</sub>) 0.94 (3H, t,  $J=7.1$  Hz, OCH<sub>2</sub>CH<sub>3</sub>), 1.20 (9H, s, C(CH<sub>3</sub>)<sub>3</sub>), 1.28 (3H, t,  $J=7.1$  Hz, OCH<sub>2</sub>CH<sub>3</sub>), 3.54 (1H, dq,  $J=7.2$  Hz, 10.7 Hz, OCH<sub>2</sub>CH<sub>3</sub>), 3.62 (1H, d,  $J=11.0$  Hz, NH), 3.81 (1H, dq,  $J=7.1$  Hz, 10.7 Hz, OCH<sub>2</sub>CH<sub>3</sub>), 4.24 (1H, dq,  $J=7.1$  Hz, 10.8 Hz, OCH<sub>2</sub>CH<sub>3</sub>), 4.41 (1H, dq,

$J=7.1$  Hz, 10.8 Hz, OCH<sub>2</sub>CH<sub>3</sub>), 5.36 (1H, br d,  $J=10.8$  Hz, H2), 5.63 (1H, s, H4), 6.46 (2H, d,  $J=8.9$  Hz, Ar-H), 7.08 (2H, d,  $J=8.9$  Hz, Ar-H), 7.26-7.45 (6H, m, Ar-H), 7.58 (2H, m, Ar-H), 7.69 (2H, m, Ar-H);  $\delta_c$  (*2,4-cis* diastereomer) (101 MHz, CDCl<sub>3</sub>) 13.6 (OCH<sub>2</sub>CH<sub>3</sub>), 14.1 (OCH<sub>2</sub>CH<sub>3</sub>), 31.5 ((CH<sub>3</sub>)<sub>3</sub>), 33.9 (C(CH<sub>3</sub>)<sub>3</sub>), 62.2 (OCH<sub>2</sub>CH<sub>3</sub>), 62.6 (OCH<sub>2</sub>CH<sub>3</sub>), 70.7 (C4), 77.2 (C5), 78.6 (C2), 114.8 (Ar-C), 125.6 (Ar-C), 127.4 (Ar-C), 128.2 (Ar-C), 128.5 (Ar-C), 128.8 (Ar-C), 129.0 (Ar-C), 139.1 (Ar-C), 140.6 (Ar-C), 141.3 (Ar-C), 144.4 (Ar-C), 166.8 (C=O), 169.2 (C=O); LRMS (ESI<sup>+</sup>)  $m/z$ : 500.2 ([M]<sup>+</sup> 35%); HRMS (ESI<sup>+</sup>)  $m/z$ : [M + H]<sup>+</sup> calcd. for C<sub>31</sub>H<sub>37</sub>N<sub>2</sub>O<sub>4</sub>, 501.2748, found 501.2737.

### General procedure for the synthesis of *N*-acylated imidazolidines:<sup>5,8</sup>

To a stirring solution of imidazolidine **20a-I** and **25** (1.0 eq.) in anhydrous DCM at 0°C was added ethyl malonyl chloride (1.05-1.1 eq.) and pyridine (1.1-1.2 eq.) dropwise. The mixture was stirred at 0°C for 10-20 min and then refluxed overnight. The mixture was then washed with sat. NH<sub>4</sub>Cl (aq.), sat. NaHCO<sub>3</sub> (aq.), brine, dried over

Na<sub>2</sub>SO<sub>4</sub>, filtered, concentrated under reduced pressure and purified by flash column chromatography to give *N*-acylated imidazolidines **21a-l** and **26**.

**Diethyl (2*S*\*,5*S*\*)-1-benzyl-3-(3-ethoxy-3-oxopropanoyl)-2,5-diphenylimidazolidine-4,4-dicarboxylate **21a****

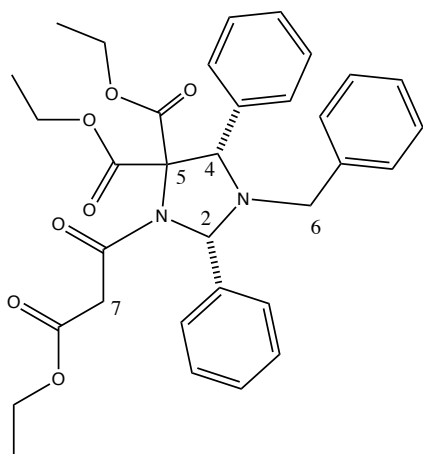

Yield (1.63 g, 84%); Thick sticky colourless oil that crystallised overnight; R<sub>f</sub> (30% EtOAc in Pet. Ether 40:60) 0.30;  $\nu_{\max}/\text{cm}^{-1}$  2982 (C-H), 1740 (C=O), 1661 (C=O);  $\delta_{\text{H}}$  (400 MHz, CDCl<sub>3</sub>) 0.93 (3H, t,  $J=7.2$  Hz, OCH<sub>2</sub>CH<sub>3</sub>), 1.18 (6H, m, OCH<sub>2</sub>CH<sub>3</sub>, OCH<sub>2</sub>CH<sub>3</sub>), 2.64 (1H, br d,  $J=15.7$  Hz, H7), 2.89 (1H, d,  $J=15.7$  Hz, H7), 3.49 (1H, d,  $J=14.9$  Hz, H6), 3.63 (1H, d,  $J=14.9$  Hz, H6), 3.69 (1H, m, OCH<sub>2</sub>CH<sub>3</sub>), 3.95 (1H, dq,  $J=7.1$  Hz, 10.6 Hz, OCH<sub>2</sub>CH<sub>3</sub>), 4.03 (2H, q,  $J=7.1$  Hz, OCH<sub>2</sub>CH<sub>3</sub>), 4.21 (2H, dq,  $J=1.1$  Hz, 7.2 Hz, OCH<sub>2</sub>CH<sub>3</sub>), 4.42 (1H, s, H4),

5.37 (1H, s, H2), 6.89 (2H, m, Ar-H), 7.20 (3H, m, Ar-H), 7.30-7.48 (8H, m, Ar-H), 7.91 (2H, m, Ar-H);  $\delta_{\text{C}}$  (101 MHz, CDCl<sub>3</sub>) 13.5 (OCH<sub>2</sub>CH<sub>3</sub>), 14.0 (OCH<sub>2</sub>CH<sub>3</sub>), 14.1 (OCH<sub>2</sub>CH<sub>3</sub>), 42.8 (C7), 50.2 (C6), 60.4 (OCH<sub>2</sub>CH<sub>3</sub>), 61.2 (OCH<sub>2</sub>CH<sub>3</sub>), 61.8 (OCH<sub>2</sub>CH<sub>3</sub>), 70.7 (C4), 75.4 (C5), 79.2 (C2), 127.6 (Ar-C), 128.2 (Ar-C), 128.4 (Ar-C), 128.9 (Ar-C), 129.0 (Ar-C), 129.2 (Ar-C), 129.8 (Ar-C), 130.0 (Ar-C), 130.2 (Ar-C), 133.6 (Ar-C), 134.4 (Ar-C), 138.7 (Ar-C), 165.3 (C=O), 165.4 (C=O), 166.6 (C=O), 166.9 (C=O); LRMS (ESI<sup>+</sup>)  $m/z$ : 573.2 ([M + H]<sup>+</sup> 55%); HRMS (ESI<sup>+</sup>)  $m/z$ : [M + H]<sup>+</sup> calcd. for C<sub>33</sub>H<sub>37</sub>N<sub>2</sub>O<sub>7</sub>, 573.2595, found 573.2594.

**Diethyl (2*S*\*,5*S*\*)-1-benzyl-3-(3-ethoxy-3-oxopropanoyl)-2,5-bis-(4-methylphenyl)imidazolidine-4,4-dicarboxylate **21b****

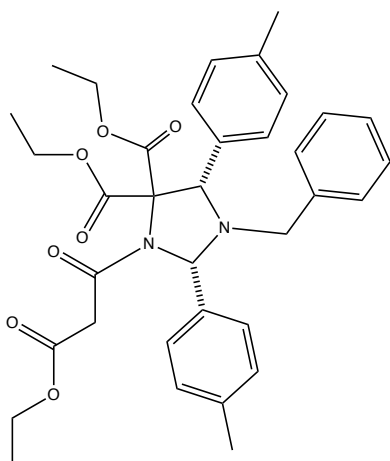

Yield (5.58 g, 67%); Thick sticky orange oil; R<sub>f</sub> (50% EtOAc in Pet. Ether 40:60) 0.63;  $\nu_{\max}/\text{cm}^{-1}$  2983 (C-H), 1743 (C=O), 1663 (C=O);  $\delta_{\text{H}}$  (400 MHz, CDCl<sub>3</sub>) 0.97 (3H, t,  $J=7.1$  Hz, OCH<sub>2</sub>CH<sub>3</sub>), 1.17 (6H, m, OCH<sub>2</sub>CH<sub>3</sub>, OCH<sub>2</sub>CH<sub>3</sub>), 2.37 (3H, s, CH<sub>3</sub>), 2.42 (3H, s, CH<sub>3</sub>), 2.63 (1H, br d,  $J=15.7$  Hz, H7), 2.91 (1H, d,  $J=15.7$  Hz, H7), 3.46 (1H, d,  $J=14.9$  Hz, H6), 3.63 (1H, d,  $J=14.9$  Hz, H6), 3.74 (1H, dq,  $J=7.0$  Hz, 10.6 Hz, OCH<sub>2</sub>CH<sub>3</sub>), 3.95 (1H, dq,  $J=7.1$  Hz, 10.7 Hz, OCH<sub>2</sub>CH<sub>3</sub>), 4.03 (2H, q,  $J=7.1$  Hz, OCH<sub>2</sub>CH<sub>3</sub>), 4.19 (2H, dq,  $J=1.9$  Hz, 7.1 Hz, OCH<sub>2</sub>CH<sub>3</sub>), 4.34

(1H, s, H4), 5.29 (1H, s, H2), 6.91 (2H, m, Ar-H), 7.11-7.38 (9H, m, Ar-H), 7.79 (2H, d,  $J=7.6$  Hz, Ar-H);  $\delta_c$  (101 MHz, CDCl<sub>3</sub>) 13.6 (OCH<sub>2</sub>CH<sub>3</sub>), 14.0 (OCH<sub>2</sub>CH<sub>3</sub>), 14.1 (OCH<sub>2</sub>CH<sub>3</sub>), 21.3 (CH<sub>3</sub>), 21.5 (CH<sub>3</sub>), 42.9 (C7), 49.5 (C6), 61.1 (OCH<sub>2</sub>CH<sub>3</sub>), 61.7 (OCH<sub>2</sub>CH<sub>3</sub>), 61.9 (OCH<sub>2</sub>CH<sub>3</sub>), 70.0 (C4), 75.1 (C5), 78.5 (C2), 127.5 (Ar-C), 128.2 (Ar-C), 129.1 (Ar-C), 129.7 (Ar-C), 130.1-130.2 (Ar-C), 131.2 (Ar-C), 133.3 (Ar-C), 135.5 (Ar-C), 138.7 (Ar-C), 139.8 (Ar-C), 165.3 (C=O), 165.4 (C=O), 166.7 (C=O), 166.9 (C=O); LRMS (ESI<sup>+</sup>)  $m/z$ : 601.3 ([M + H]<sup>+</sup> 60%), 623.2 ([M + Na]<sup>+</sup> 100%); HRMS (ESI<sup>+</sup>)  $m/z$ : [M + H]<sup>+</sup> calcd. for C<sub>35</sub>H<sub>41</sub>N<sub>2</sub>O<sub>7</sub>, 601.2908, found 601.2906.

**Diethyl (2S\*,5S\*)-1-benzyl-3-(3-ethoxy-3-oxopropanoyl)-2,5-bis-(4-methoxyphenyl)imidazolidine-4,4-dicarboxylate 21c**

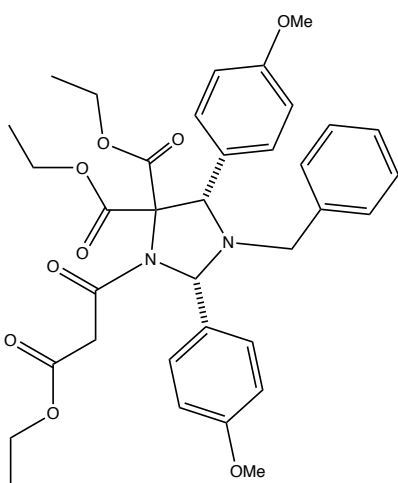

Yield (3.07 g, 56%); Thick sticky orange oil that crystallised overnight;  $R_f$  (50% EtOAc in Pet. Ether 40:60) 0.50;  $\nu_{max}/cm^{-1}$  2982 (C-H), 1742 (C=O), 1659 (C=O);  $\delta_H$  (400 MHz, CDCl<sub>3</sub>) 1.00 (3H, t,  $J=7.2$  Hz, OCH<sub>2</sub>CH<sub>3</sub>), 1.18 (6H, m, OCH<sub>2</sub>CH<sub>3</sub>, OCH<sub>2</sub>CH<sub>3</sub>), 2.64 (1H, br d,  $J=15.7$  Hz, H7), 2.91 (1H, d,  $J=15.6$  Hz, H7), 3.46 (1H, d,  $J=14.8$  Hz, H6), 3.61 (1H, d,  $J=15.1$  Hz, H6), 3.77 (1H, m, OCH<sub>2</sub>CH<sub>3</sub>), 3.82 (3H, s, OCH<sub>3</sub>), 3.87 (3H, s, OCH<sub>3</sub>), 3.97 (1H, m, OCH<sub>2</sub>CH<sub>3</sub>), 4.04 (2H, q,  $J=7.2$  Hz, OCH<sub>2</sub>CH<sub>3</sub>), 4.19 (2H, dq,  $J=1.3$  Hz, 7.1 Hz, OCH<sub>2</sub>CH<sub>3</sub>), 4.31 (1H, s, H4), 5.28 (1H, s, H2), 6.85-7.84 (13H, m, Ar-H);  $\delta_c$  (101 MHz,

CDCl<sub>3</sub>) 13.7 (OCH<sub>2</sub>CH<sub>3</sub>), 14.0 (OCH<sub>2</sub>CH<sub>3</sub>), 14.1 (OCH<sub>2</sub>CH<sub>3</sub>), 42.9 (C7), 49.8 (C6), 55.4 (OCH<sub>3</sub>), 55.4 (OCH<sub>3</sub>), 61.2 (OCH<sub>2</sub>CH<sub>3</sub>), 61.8 (OCH<sub>2</sub>CH<sub>3</sub>), 61.9 (OCH<sub>2</sub>CH<sub>3</sub>), 69.8 (C4), 75.1 (C5), 78.4 (C2), 113.8 (Ar-C), 114.3 (Ar-C), 126.1 (Ar-C), 127.5 (Ar-C), 128.2 (Ar-C), 129.3 (Ar-C), 130.1 (Ar-C), 130.4 (Ar-C), 131.5 (Ar-C), 133.6 (Ar-C), 160.1 (Ar-C), 160.6 (Ar-C), 165.3 (C=O), 165.6 (C=O), 166.8 (C=O), 167.0 (C=O); LRMS (ESI<sup>+</sup>)  $m/z$ : 655.2 ([M + Na]<sup>+</sup> 63%); HRMS (ESI<sup>+</sup>)  $m/z$ : [M + H]<sup>+</sup> calcd. for C<sub>35</sub>H<sub>41</sub>N<sub>2</sub>O<sub>9</sub>, 633.2807, found 633.2798.

**Diethyl (2S\*,5S\*)-1-benzyl-3-(3-ethoxy-3-oxopropanoyl)-2,5-bis(4-fluorophenyl)imidazolidine-4,4-dicarboxylate 21d**

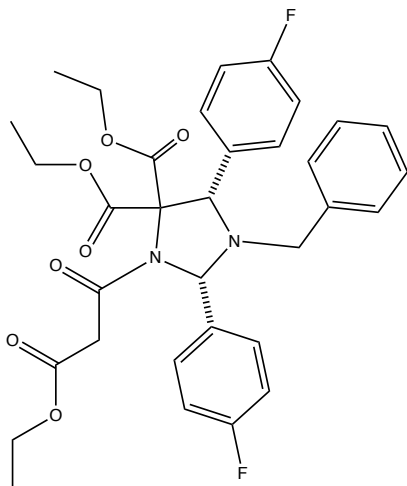

Yield (5.78 g, 77%); Thick sticky yellow oil;  $R_f$  (50% EtOAc in Pet. Ether 40:60) 0.73;  $\nu_{\max}/\text{cm}^{-1}$  2984 (C-H), 1740 (C=O), 1662 (C=O);  $\delta_H$  (400 MHz,  $\text{CDCl}_3$ ) 0.98 (3H, t,  $J=7.2$  Hz,  $\text{OCH}_2\text{CH}_3$ ), 1.17 (3H, t,  $J=7.1$  Hz,  $\text{OCH}_2\text{CH}_3$ ) 1.21 (3H, t,  $J=7.1$  Hz,  $\text{OCH}_2\text{CH}_3$ ), 2.68 (1H, br d,  $J=15.7$  Hz, H7), 2.87 (1H, d,  $J=15.6$  Hz, H7), 3.49 (1H, d,  $J=14.8$  Hz, H6), 3.58 (1H, d,  $J=14.8$  Hz, H6), 3.74 (1H, dq,  $J=7.1$  Hz, 10.7 Hz,  $\text{OCH}_2\text{CH}_3$ ), 3.97 (1H, m,  $\text{OCH}_2\text{CH}_3$ ), 4.05 (2H, m,  $\text{OCH}_2\text{CH}_3$ ), 4.22 (2H, q,  $J=7.1$  Hz,  $\text{OCH}_2\text{CH}_3$ ), 4.39 (1H, s, H4), 5.36 (1H, s,

H2), 6.84 (2H, m, Ar-H), 7.02-7.28 (7H, m, Ar-H), 7.40 (2H, m, Ar-H), 7.87 (2H, m, Ar-H);  $\delta_C$  (101 MHz,  $\text{CDCl}_3$ ) 13.7 ( $\text{OCH}_2\text{CH}_3$ ), 14.0 ( $\text{OCH}_2\text{CH}_3$ ), 14.1 ( $\text{OCH}_2\text{CH}_3$ ), 42.9 (C7), 50.8 (C6), 61.3 ( $\text{OCH}_2\text{CH}_3$ ), 62.0 ( $\text{OCH}_2\text{CH}_3$ ), 62.2 ( $\text{OCH}_2\text{CH}_3$ ), 70.3 (C4), 75.3 (C5), 78.8 (C2), 115.4 (d,  $J=21.5$  Hz, Ar-C), 116.0 (br d,  $J=22.0$  Hz, Ar-C), 127.7 (Ar-C), 128.3 (Ar-C), 129.8 (Ar-C), 130.0 (d,  $J=3.1$  Hz, Ar-C), 130.8 (Ar-C), 132.0 (d,  $J=8.3$  Hz, Ar-C), 133.6 (Ar-C), 134.6 (d,  $J=3.2$  Hz, Ar-C), 163.1 (d,  $J=247.8$  Hz, Ar-C), 163.5 (d,  $J=249.7$  Hz, Ar-C), 165.2 (C=O), 165.5 (C=O), 166.4 (C=O), 166.8 (C=O);  $\delta_F$  (377 MHz,  $\text{CDCl}_3$ ) -110.97, -112.77; LRMS (ESI<sup>+</sup>)  $m/z$ : 631.2 ([M + Na]<sup>+</sup> 95%); HRMS (ESI<sup>+</sup>)  $m/z$ : [M + H]<sup>+</sup> calcd. for  $\text{C}_{33}\text{H}_{35}\text{N}_2\text{O}_7\text{F}_2$ , 609.2407, found 609.2410.

**Diethyl (2S\*,5S\*)-1-benzyl-2,5-bis(4-chlorophenyl)-3-(3-ethoxy-3-oxopropanoyl)imidazolidine-4,4-dicarboxylate 21d**

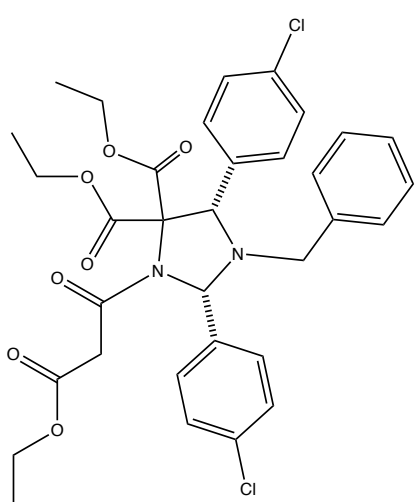

Yield (1.57 g, 70%); Thick sticky pale yellow oil;  $R_f$  (30% EtOAc in Pet. Ether 40:60) 0.33;  $\nu_{\max}/\text{cm}^{-1}$  2983 (C-H), 1742 (C=O), 1665 (C=O);  $\delta_H$  (400 MHz,  $\text{CDCl}_3$ ) 0.97 (3H, t,  $J=7.1$  Hz,  $\text{OCH}_2\text{CH}_3$ ), 1.18 (6H, m,  $\text{OCH}_2\text{CH}_3$ ,  $\text{OCH}_2\text{CH}_3$ ), 2.70 (1H, br d,  $J=15.8$  Hz, H7), 2.88 (1H, d,  $J=15.6$  Hz, H7), 3.47 (1H, d,  $J=14.8$  Hz, H6), 3.57 (1H, d,  $J=14.8$  Hz, H6), 3.74 (1H, dq,  $J=7.1$  Hz, 10.7 Hz,  $\text{OCH}_2\text{CH}_3$ ), 3.96 (1H, m,  $\text{OCH}_2\text{CH}_3$ ), 4.03 (2H, dq,  $J=1.3$  Hz, 7.2 Hz,  $\text{OCH}_2\text{CH}_3$ ), 4.21 (2H, q,  $J=7.1$  Hz,  $\text{OCH}_2\text{CH}_3$ ), 4.38 (1H, s, H4), 5.34 (1H, s, H2), 6.83 (2H, m, Ar-H), 7.17-7.22 (3H, m, Ar-H), 7.34 (4H, m, Ar-H), 7.40 (2H, d,  $J=8.6$  Hz,

Ar-H), 7.80 (2H, d,  $J=8.4$  Hz, Ar-H);  $\delta_C$  (101 MHz,  $\text{CDCl}_3$ ) 13.6 ( $\text{OCH}_2\text{CH}_3$ ), 14.0 ( $\text{OCH}_2\text{CH}_3$ ), 14.1 ( $\text{OCH}_2\text{CH}_3$ ), 42.9 (C7), 50.9 (C6), 61.4 ( $\text{OCH}_2\text{CH}_3$ ), 62.1 ( $\text{OCH}_2\text{CH}_3$ ), 62.4 ( $\text{OCH}_2\text{CH}_3$ ), 70.4 (C4), 75.3 (C5), 78.8 (C2), 127.8 (Ar-C),

128.4 (Ar-C), 128.7 (Ar-C), 129.3 (Ar-C), 129.9 (Ar-C), 130.5 (Ar-C), 131.5 (Ar-C), 133.0 (Ar-C), 133.4 (Ar-C), 134.9 (Ar-C), 137.3 (Ar-C), 165.1 (C=O), 166.4 (C=O), 166.8 (C=O); LRMS (ESI<sup>+</sup>) *m/z*: 663.1 ([M<sup>35+35</sup> + Na]<sup>+</sup> 100%), 665.1 ([M<sup>35+37</sup> + Na]<sup>+</sup> 83%), 667.1 ([M<sup>37+37</sup> + Na]<sup>+</sup> 28%); HRMS (ESI<sup>+</sup>) *m/z*: [M<sup>35+35</sup> + Na]<sup>+</sup> calcd. for C<sub>33</sub>H<sub>34</sub>N<sub>2</sub>O<sub>7</sub>Cl<sub>2</sub>Na, 663.1635, found 663.1633; [M<sup>35+37</sup> + Na]<sup>+</sup> calcd. for C<sub>33</sub>H<sub>34</sub>N<sub>2</sub>O<sub>7</sub>Cl<sub>2</sub>Na, 665.1613, found 665.1599; [M<sup>37+37</sup> + Na]<sup>+</sup> calcd. for C<sub>33</sub>H<sub>34</sub>N<sub>2</sub>O<sub>7</sub>Cl<sub>2</sub>Na, 667.1603, found 667.1555.

**Diethyl (2S\*,5S\*)-1-benzyl-2,5-bis(4-bromophenyl)-3-(3-ethoxy-3-oxopropanoyl)imidazolidine-4,4-dicarboxylate 21f**

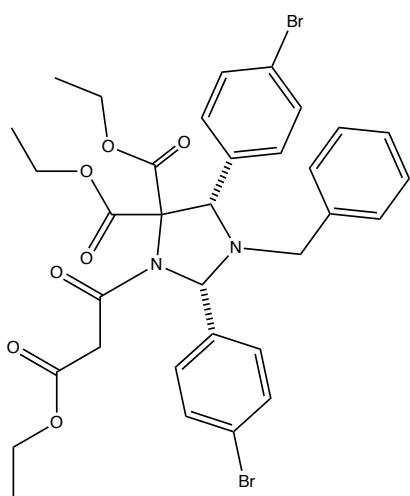

Yield (5.82 g, 76%); Thick sticky orange oil; R<sub>f</sub> (50% EtOAc in Pet. Ether 40:60) 0.75;  $\nu_{\max}/\text{cm}^{-1}$  2982 (C-H), 1739 (C=O), 1663 (C=O);  $\delta_{\text{H}}$  (400 MHz, CDCl<sub>3</sub>) 0.99 (3H, t, *J*=7.1 Hz, OCH<sub>2</sub>CH<sub>3</sub>), 1.19 (6H, m, OCH<sub>2</sub>CH<sub>3</sub>, OCH<sub>2</sub>CH<sub>3</sub>), 2.72 (1H, br d, *J*=15.1 Hz, H7), 2.89 (1H, d, *J*=15.6 Hz, H7), 3.49 (1H, d, *J*=14.8 Hz, H6), 3.57 (1H, d, *J*=14.8 Hz, H6), 3.75 (1H, dq, *J*=7.2 Hz, 10.7 Hz, OCH<sub>2</sub>CH<sub>3</sub>), 3.97 (1H, m, OCH<sub>2</sub>CH<sub>3</sub>), 4.04 (2H, dq, *J*=1.4 Hz, 7.1 Hz, OCH<sub>2</sub>CH<sub>3</sub>), 4.22 (2H, q, *J*=7.1 Hz, OCH<sub>2</sub>CH<sub>3</sub>), 4.38 (1H, s, H4), 5.34 (1H, s, H2), 6.84 (2H, m, Ar-H), 7.18-7.22 (3H, m, Ar-H), 7.29 (2H, m, Ar-H), 7.50 (2H, d, *J*=8.7 Hz,

Ar-H), 7.56 (2H, d, *J*=8.5 Hz, Ar-H), 7.74 (2H, d, *J*=8.4 Hz, Ar-H);  $\delta_{\text{C}}$  (101 MHz, CDCl<sub>3</sub>) 13.6 (OCH<sub>2</sub>CH<sub>3</sub>), 14.0 (OCH<sub>2</sub>CH<sub>3</sub>), 14.1 (OCH<sub>2</sub>CH<sub>3</sub>), 42.9 (C7), 50.9 (C6), 61.4 (OCH<sub>2</sub>CH<sub>3</sub>), 62.1 (OCH<sub>2</sub>CH<sub>3</sub>), 62.3 (OCH<sub>2</sub>CH<sub>3</sub>), 70.5 (C4), 75.2 (C5), 78.9 (C2), 123.1 (Ar-C), 124.0 (Ar-C), 127.8 (Ar-C), 128.4 (Ar-C), 129.8 (Ar-C), 130.7 (Ar-C), 131.7 (Ar-C), 131.8 (Ar-C), 132.2 (Ar-C), 133.4 (Ar-C), 133.5 (Ar-C), 137.9 (Ar-C), 165.0 (C=O), 165.4 (C=O), 166.3 (C=O), 166.8 (C=O); LRMS (ESI<sup>+</sup>) *m/z*: 751.0 ([M<sup>79+79</sup> + Na]<sup>+</sup> 47%), 753.0 ([M<sup>79+81</sup> + Na]<sup>+</sup> 98%), 755.0 ([M<sup>81+81</sup> + Na]<sup>+</sup> 49%); HRMS (ESI<sup>+</sup>) *m/z*: [M<sup>79+79</sup> + H]<sup>+</sup> calcd. for C<sub>33</sub>H<sub>35</sub>N<sub>2</sub>O<sub>7</sub>Br<sub>2</sub>, 729.0806, found 729.0800; [M<sup>79+81</sup> + H]<sup>+</sup> calcd. for C<sub>33</sub>H<sub>35</sub>N<sub>2</sub>O<sub>7</sub>Br<sub>2</sub>, 731.0785, found 731.0778; [M<sup>81+81</sup> + H]<sup>+</sup> calcd. for C<sub>33</sub>H<sub>35</sub>N<sub>2</sub>O<sub>7</sub>Br<sub>2</sub>, 733.0765, found 733.0761.

**Diethyl (2S\*,5S\*)-1-benzyl-3-(3-ethoxy-3-oxopropanoyl)-2,5-di(naphthalen-1-yl)imidazolidine-4,4-dicarboxylate 21g**

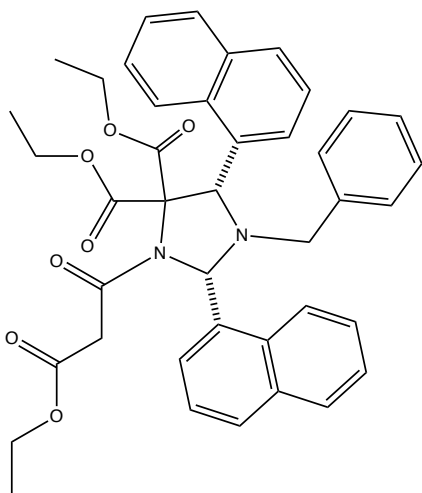

Yield (1.61 g, 85%); Light yellow foamy solid; m.p. 75-78°C;  $R_f$  (30% EtOAc in Pet. Ether 40:60) 0.28;  $\nu_{\max}/\text{cm}^{-1}$  3061 (C-H), 2983 (C-H), 1740 (C=O), 1659 (C=O);  $\delta_{\text{H}}$  (400 MHz,  $\text{CDCl}_3$ ) 0.65 (3H, t,  $J=7.2$  Hz,  $\text{OCH}_2\text{CH}_3$ ), 1.06 (3H, t,  $J=7.1$  Hz,  $\text{OCH}_2\text{CH}_3$ ), 1.16 (3H, t,  $J=7.2$  Hz,  $\text{OCH}_2\text{CH}_3$ ), 2.55 (1H, br d,  $J=15.8$  Hz, H7), 2.86 (1H, d,  $J=15.8$  Hz, H7), 3.41 (1H, m,  $\text{OCH}_2\text{CH}_3$ ), 3.47 (1H, d,  $J=14.7$  Hz, H6), 3.67 (1H, d,  $J=14.9$  Hz, H6), 3.92 (3H, m,  $\text{OCH}_2\text{CH}_3$ ,  $\text{OCH}_2\text{CH}_3$ ), 4.27 (2H, m,  $\text{OCH}_2\text{CH}_3$ ), 5.55 (1H, s, H4), 6.50 (1H, s, H2), 6.57-8.82 (19H, m, Ar-H);  $\delta_{\text{C}}$  (101 MHz,  $\text{CDCl}_3$ ) 13.3 ( $\text{OCH}_2\text{CH}_3$ ), 13.9 ( $\text{OCH}_2\text{CH}_3$ ), 13.9 ( $\text{OCH}_2\text{CH}_3$ ), 42.3 (C7), 51.9 (C6), 61.1 ( $\text{OCH}_2\text{CH}_3$ ), 61.6 ( $\text{OCH}_2\text{CH}_3$ ), 62.5 ( $\text{OCH}_2\text{CH}_3$ ), 66.6 (C4), 73.7 (C2), 76.1 (C5), 121.8-134.4 (Ar-C), 165.5 (C=O), 165.7 (C=O), 166.7 (C=O), 168.2 (C=O); LRMS (ESI<sup>-</sup>)  $m/z$ : 672.1 ([M]<sup>-</sup> 100%); HRMS (ESI<sup>-</sup>)  $m/z$ : [M - H]<sup>-</sup> calcd. for  $\text{C}_{41}\text{H}_{39}\text{N}_2\text{O}_7$ , 671.2763, found 671.2776.

**Diethyl (2S\*,5S\*)-1-benzyl-3-(3-ethoxy-3-oxopropanoyl)-2,5-bis(4-nitrophenyl)imidazolidine-4,4-dicarboxylate 21h**

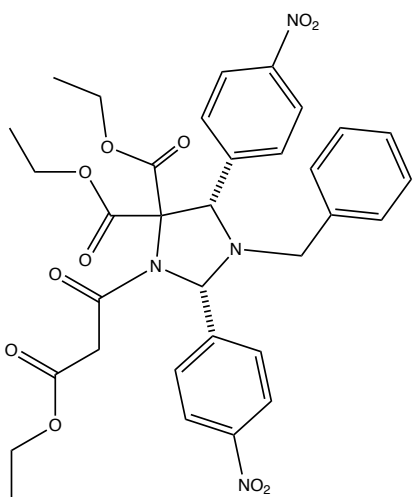

Yield (1.68 g, Quantitative); Yellow foamy solid; m.p. 69-72°C;  $R_f$  (30% EtOAc in Pet. Ether 40:60) 0.08;  $\nu_{\max}/\text{cm}^{-1}$  2984 (C-H), 1739 (C=O), 1666 (C=O);  $\delta_{\text{H}}$  (400 MHz,  $\text{CDCl}_3$ ) 0.99 (3H, t,  $J=7.2$  Hz,  $\text{OCH}_2\text{CH}_3$ ), 1.18 (3H, t,  $J=7.1$  Hz,  $\text{OCH}_2\text{CH}_3$ ), 1.29 (3H, t,  $J=7.1$  Hz,  $\text{OCH}_2\text{CH}_3$ ), 2.84 (2H, br m, H7), 3.59 (2H, s, H6), 3.77 (1H, dq,  $J=7.2$  Hz, 10.9 Hz,  $\text{OCH}_2\text{CH}_3$ ), 4.03 (3H, m,  $\text{OCH}_2\text{CH}_3$ ,  $\text{OCH}_2\text{CH}_3$ ), 4.31 (2H, q,  $J=7.1$  Hz,  $\text{OCH}_2\text{CH}_3$ ), 4.64 (1H, s, H4), 5.55 (1H, s, H2), 6.82 (2H, m, Ar-H), 7.15 (3H, m, Ar-H), 7.64 (2H, d,  $J=8.3$  Hz, Ar-H), 8.01 (2H, d,  $J=8.8$  Hz, Ar-H), 8.23 (4H, m, Ar-H);  $\delta_{\text{C}}$  (101 MHz,  $\text{CDCl}_3$ )

13.7 ( $\text{OCH}_2\text{CH}_3$ ), 14.0 ( $\text{OCH}_2\text{CH}_3$ ), 14.1 ( $\text{OCH}_2\text{CH}_3$ ), 42.9 (C7), 52.9 (C6), 61.6 ( $\text{OCH}_2\text{CH}_3$ ), 62.5 ( $\text{OCH}_2\text{CH}_3$ ), 63.0 ( $\text{OCH}_2\text{CH}_3$ ), 71.6 (C4), 75.6 (C5), 79.6 (C2), 123.5 (Ar-C), 123.9 (Ar-C), 128.1 (Ar-C), 128.5 (Ar-C), 129.5 (Ar-C), 130.1 (Ar-C), 130.9 (Ar-C), 133.4 (Ar-C), 141.9 (Ar-C), 146.1 (Ar-C), 148.4 (Ar-C), 148.6 (Ar-C), 164.9 (C=O), 165.2 (C=O), 165.9 (C=O), 166.6 (C=O); LRMS (ESI<sup>+</sup>)  $m/z$ : 685.2 ([M + Na]<sup>+</sup> 95%); HRMS (ESI<sup>+</sup>)  $m/z$ : [M + H]<sup>+</sup> calcd. for  $\text{C}_{33}\text{H}_{35}\text{N}_4\text{O}_{11}$ , 663.2297, found 663.2289.

**Diethyl (2S\*,5S\*)-1-benzyl-3-(3-ethoxy-3-oxopropanoyl)-2,5-bis(4-(trifluoromethyl)phenyl)imidazolidine-4,4-dicarboxylate 21i**

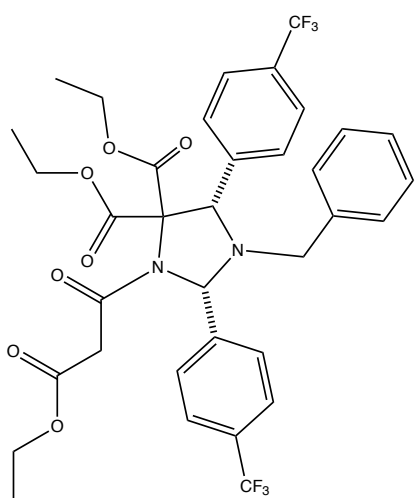

Yield (1.19 g, 66%); Thick sticky orange oil;  $R_f$  (30% EtOAc in Pet. Ether 40:60) 0.30;  $\nu_{\max}/\text{cm}^{-1}$  2986 (C-H), 1742 (C=O), 1667 (C=O);  $\delta_H$  (400 MHz,  $\text{CDCl}_3$ ) 0.91 (3H, t,  $J=7.2$  Hz,  $\text{OCH}_2\text{CH}_3$ ), 1.16 (3H, t,  $J=7.1$  Hz,  $\text{OCH}_2\text{CH}_3$ ), 1.24 (3H, t,  $J=7.2$  Hz,  $\text{OCH}_2\text{CH}_3$ ), 2.71 (1H, br m, H7), 2.87 (1H, d,  $J=15.4$  Hz, H7), 3.53 (1H, d,  $J=14.7$  Hz, H6), 3.58 (1H, d,  $J=14.7$  Hz, H6), 3.70 (1H, m,  $\text{OCH}_2\text{CH}_3$ ), 3.94 (1H, m,  $\text{OCH}_2\text{CH}_3$ ), 4.02 (2H, dq,  $J=3.1$  Hz, 7.1 Hz,  $\text{OCH}_2\text{CH}_3$ ), 4.25 (2H, q,  $J=7.2$  Hz,  $\text{OCH}_2\text{CH}_3$ ), 4.54 (1H, s, H4), 5.46 (1H, s, H2), 6.82 (2H, m, Ar-H), 7.15 (3H, m, Ar-H), 7.56 (2H, d,  $J=8.2$  Hz, Ar-H), 7.64 (4H, m, Ar-H),

7.97 (2H, d,  $J=7.9$  Hz, Ar-H);  $\delta_c$  (101 MHz,  $\text{CDCl}_3$ ) 13.4 ( $\text{OCH}_2\text{CH}_3$ ), 14.0 ( $\text{OCH}_2\text{CH}_3$ ), 14.1 ( $\text{OCH}_2\text{CH}_3$ ), 42.9 (C7), 52.0 (C6), 61.5 ( $\text{OCH}_2\text{CH}_3$ ), 62.2 ( $\text{OCH}_2\text{CH}_3$ ), 62.6 ( $\text{OCH}_2\text{CH}_3$ ), 71.2 (C4), 75.5 (C5), 79.5 (C2), 125.4 (q,  $J=3.5$  Hz, Ar-C), 125.9 (Ar-C), 127.9 (Ar-C), 128.4 (Ar-C), 129.5 (Ar-C), 129.6 (Ar-C), 130.5 (Ar-C), 131.2 (Ar-C), 131.5 (Ar-C), 133.4 (Ar-C), 138.8 (Ar-C), 143.0 (Ar-C), 165.0 (C=O), 165.3 (C=O), 166.2 (C=O), 166.8 (C=O);  $\delta_f$  (377 MHz,  $\text{CDCl}_3$ ) -62.74, -62.80; LRMS ( $\text{ESI}^+$ )  $m/z$ : 709.2 ( $[\text{M} + \text{H}]^+$  8%); LRMS ( $\text{ESI}^-$ )  $m/z$ : 707.2 ( $[\text{M} - \text{H}]^-$  95%); HRMS ( $\text{ESI}^+$ )  $m/z$ :  $[\text{M} + \text{H}]^+$  calcd. for  $\text{C}_{35}\text{H}_{35}\text{N}_2\text{O}_7\text{F}_6$ , 709.2343, found 709.2337.

**Diethyl (2S\*,5S\*)-1-benzyl-2,5-bis(4-cyanophenyl)-3-(3-ethoxy-3-oxopropanoyl)imidazolidine-4,4-dicarboxylate 21j**

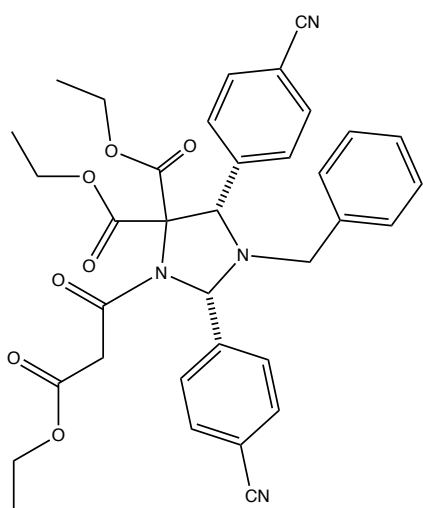

Yield (682 mg, 69%); White crystals/colourless oil;  $R_f$  (50% EtOAc in Pet. Ether 40:60) 0.33;  $\nu_{\max}/\text{cm}^{-1}$  2984 (C-H), 2229 ( $\text{C}\equiv\text{N}$ ), 1743 (C=O), 1667 (C=O);  $\delta_H$  (400 MHz,  $\text{CDCl}_3$ ) 0.94 (3H, t,  $J=7.2$  Hz,  $\text{OCH}_2\text{CH}_3$ ), 1.17 (3H, t,  $J=7.2$  Hz,  $\text{OCH}_2\text{CH}_3$ ), 1.24 (3H, t,  $J=7.1$  Hz,  $\text{OCH}_2\text{CH}_3$ ), 2.72 (1H, br m, H7), 2.83 (1H, d,  $J=15.0$  Hz, H7), 3.51 (1H, d,  $J=14.9$  Hz, H6), 3.56 (1H, d,  $J=14.7$  Hz, H6), 3.70 (1H, dq,  $J=7.1$  Hz, 10.6 Hz,  $\text{OCH}_2\text{CH}_3$ ), 3.96 (1H, m,  $\text{OCH}_2\text{CH}_3$ ), 4.03 (2H, dq,  $J=1.0$  Hz, 7.2 Hz,  $\text{OCH}_2\text{CH}_3$ ), 4.26 (2H, q,  $J=7.1$  Hz,  $\text{OCH}_2\text{CH}_3$ ),



4.53 (1H, s, H4), 5.45 (1H, s, H2), 6.77 (2H, m, Ar-H), 7.14 (3H, m, Ar-H), 7.54 (2H, d,  $J=8.0$  Hz, Ar-H), 7.65 (4H, m, Ar-H), 7.92 (2H, d,  $J=8.0$  Hz, Ar-H);  $\delta_c$  (101 MHz, CDCl<sub>3</sub>) 13.6 (OCH<sub>2</sub>CH<sub>3</sub>), 14.0 (OCH<sub>2</sub>CH<sub>3</sub>), 14.1 (OCH<sub>2</sub>CH<sub>3</sub>), 42.8 (C7), 52.7 (C6), 61.6 (OCH<sub>2</sub>CH<sub>3</sub>), 62.4 (OCH<sub>2</sub>CH<sub>3</sub>), 62.9 (OCH<sub>2</sub>CH<sub>3</sub>), 71.7 (C4), 75.5 (C5), 79.8 (C2), 113.0 (Ar-C), 118.4 (C≡N), 128.1 (Ar-C), 128.5 (Ar-C), 129.5 (Ar-C), 129.9 (Ar-C), 130.7 (Ar-C), 132.2 (Ar-C), 132.6 (Ar-C), 133.4 (Ar-C), 140.0 (Ar-C), 144.2 (Ar-C), 164.9 (C=O), 165.3 (C=O), 166.0 (C=O), 166.6 (C=O); LRMS (ESI<sup>+</sup>)  $m/z$ : 623.2 ([M + H]<sup>+</sup> 17%); LRMS (ESI<sup>-</sup>)  $m/z$ : 621.2 ([M - H]<sup>-</sup> 94%); HRMS (ESI<sup>+</sup>)  $m/z$ : [M + H]<sup>+</sup> calcd. for C<sub>35</sub>H<sub>35</sub>N<sub>4</sub>O<sub>7</sub>, 623.2500, found 623.2495.

**Diethyl (2S\*,5S\*)-1-benzyl-2,5-bis(3-bromophenyl)-3-(3-ethoxy-3-oxopropanoyl)imidazolidine-4,4-dicarboxylate 21k**

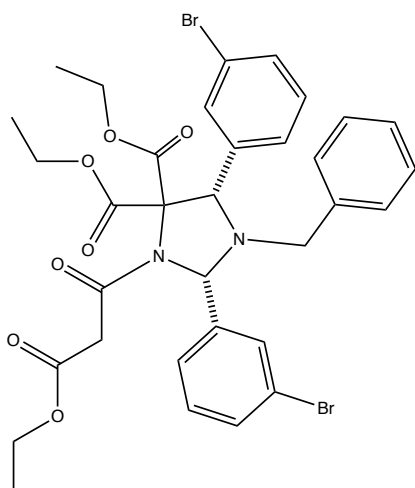

Yield (887 mg, 85%); Thick sticky pale yellow oil;  $R_f$  (30% EtOAc in Pet. Ether 40:60) 0.28;  $\nu_{\max}/\text{cm}^{-1}$  2983 (C-H), 1742 (C=O), 1666 (C=O);  $\delta_H$  (400 MHz, CDCl<sub>3</sub>) 1.09 (3H, t,  $J=7.2$  Hz, OCH<sub>2</sub>CH<sub>3</sub>), 1.19 (3H, t,  $J=7.1$  Hz, OCH<sub>2</sub>CH<sub>3</sub>), 1.24 (3H, t,  $J=7.1$  Hz, OCH<sub>2</sub>CH<sub>3</sub>), 2.74 (1H, br m, H7), 2.88 (1H, d,  $J=15.7$  Hz, H7), 3.53 (1H, d,  $J=14.7$  Hz, H6), 3.60 (1H, d,  $J=14.7$  Hz, H6), 3.85 (1H, m, OCH<sub>2</sub>CH<sub>3</sub>), 3.99 (1H, m, OCH<sub>2</sub>CH<sub>3</sub>), 4.06 (2H, dq,  $J=0.9$  Hz, 7.1 Hz, OCH<sub>2</sub>CH<sub>3</sub>), 4.24 (2H, dq,  $J=2.5$  Hz, 7.1 Hz, OCH<sub>2</sub>CH<sub>3</sub>), 4.38 (1H, s, H4), 5.32 (1H, s, H2), 6.86 (2H, m, Ar-H), 7.18-7.38 (7H, m, Ar-H), 7.48 (1H, m,

Ar-H), 7.53 (1H, m, Ar-H), 7.81 (1H, d,  $J=7.7$  Hz, Ar-H), 7.93 (1H, m, Ar-H);  $\delta_c$  (101 MHz, CDCl<sub>3</sub>) 13.8 (OCH<sub>2</sub>CH<sub>3</sub>), 14.0 (OCH<sub>2</sub>CH<sub>3</sub>), 14.1 (OCH<sub>2</sub>CH<sub>3</sub>), 42.9 (C7), 51.6 (C6), 61.4 (OCH<sub>2</sub>CH<sub>3</sub>), 62.2 (OCH<sub>2</sub>CH<sub>3</sub>), 62.5 (OCH<sub>2</sub>CH<sub>3</sub>), 70.8 (C4), 75.3 (C5), 79.2 (C2), 122.6 (Ar-C), 123.0 (Ar-C), 127.9 (Ar-C), 128.4 (Ar-C), 128.8 (Ar-C), 129.7 (Ar-C), 130.1 (Ar-C), 130.6 (Ar-C), 132.2 (Ar-C), 133.0 (Ar-C), 133.6 (Ar-C), 136.8 (Ar-C), 141.1 (Ar-C), 165.1 (C=O), 166.4 (C=O), 166.7 (C=O); LRMS (ESI<sup>-</sup>)  $m/z$ : 727.0 ([M<sup>79+79</sup> - H]<sup>-</sup> 52%), 729.0 ([M<sup>79+81</sup> - H]<sup>-</sup> 100%), 731.0 ([M<sup>81+81</sup> - H]<sup>-</sup> 57%); HRMS (ESI<sup>+</sup>)  $m/z$ : [M<sup>79+79</sup> + H]<sup>+</sup> calcd. for C<sub>33</sub>H<sub>35</sub>N<sub>2</sub>O<sub>7</sub>Br<sub>2</sub>, 729.0806, found 729.0804; [M<sup>79+81</sup> + H]<sup>+</sup> calcd. for C<sub>33</sub>H<sub>35</sub>N<sub>2</sub>O<sub>7</sub>Br<sub>2</sub>, 731.0787, found 731.0783; [M<sup>81+81</sup> + H]<sup>+</sup> calcd. for C<sub>33</sub>H<sub>35</sub>N<sub>2</sub>O<sub>7</sub>Br<sub>2</sub>, 733.0774, found 733.0765.

**Diethyl (2S\*,5S\*)-1-benzyl-3-(3-ethoxy-3-oxopropanoyl)-2,5-bis(2-fluorophenyl)imidazolidine-4,4-dicarboxylate 21I**

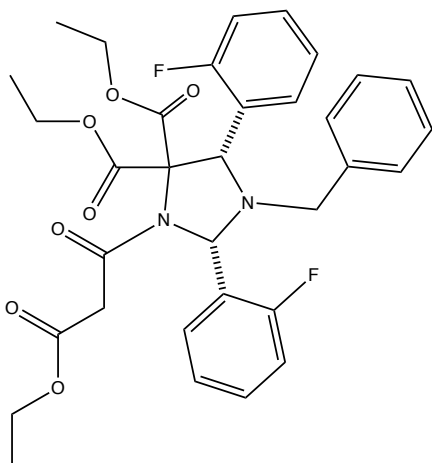

Yield (791 mg, 79%); Thick sticky orange oil;  $R_f$  (30% EtOAc in Pet. Ether 40:60) 0.30;  $\nu_{\max}/\text{cm}^{-1}$  2985 (C-H), 1744 (C=O), 1668 (C=O);  $\delta_H$  (400 MHz,  $\text{CDCl}_3$ ) 0.93 (3H, t,  $J=7.1$  Hz,  $\text{OCH}_2\text{CH}_3$ ), 1.18 (3H, t,  $J=7.2$  Hz,  $\text{OCH}_2\text{CH}_3$ ), 1.20 (3H, t,  $J=7.1$  Hz,  $\text{OCH}_2\text{CH}_3$ ), 2.72 (1H, br d,  $J=15.8$  Hz, H7), 3.04 (1H, d,  $J=15.8$  Hz, H7), 3.56 (1H, d,  $J=14.8$  Hz, H6), 3.60 (1H, d,  $J=14.7$  Hz, H6), 3.66 (2H, br m,  $\text{OCH}_2\text{CH}_3$ ), 4.04 (2H, dq,  $J=1.5$  Hz, 7.1 Hz,  $\text{OCH}_2\text{CH}_3$ ), 4.20 (2H, m,  $\text{OCH}_2\text{CH}_3$ ), 4.85 (1H, s, H4), 5.89 (1H, s, H2), 6.91-8.32 (13H, m, Ar-H);

$\delta_C$  (101 MHz,  $\text{CDCl}_3$ ) 13.6 ( $\text{OCH}_2\text{CH}_3$ ), 13.9 ( $\text{OCH}_2\text{CH}_3$ ), 14.1 ( $\text{OCH}_2\text{CH}_3$ ), 42.0 (C7), 52.1 (C6), 61.3 ( $\text{OCH}_2\text{CH}_3$ ), 62.0 ( $\text{OCH}_2\text{CH}_3$ ), 62.3 ( $\text{OCH}_2\text{CH}_3$ ), 63.6 (C4), 71.6 (C2), 74.8 (C5), 115.2 (d,  $J=21.8$  Hz, Ar-C), 115.7 (d,  $J=21.9$  Hz, Ar-C), 122.2 (d,  $J=12.1$  Hz, Ar-C), 124.2 (d,  $J=3.5$  Hz, Ar-C), 125.6 (Ar-C), 126.1 (d,  $J=8.9$  Hz, Ar-C), 127.6 (Ar-C), 128.2 (Ar-C), 129.1 (Ar-C), 129.6 (Ar-C), 130.4 (d,  $J=8.3$  Hz, Ar-C), 131.5 (d,  $J=9.3$  Hz, Ar-C), 131.9 (Ar-C), 133.4 (Ar-C), 161.3 (d,  $J=247.1$  Hz, Ar-C), 161.9 (d,  $J=248.4$  Hz, Ar-C), 165.0 (C=O), 165.6 (C=O), 166.2 (C=O), 166.3 (C=O);  $\delta_F$  (377 MHz,  $\text{CDCl}_3$ ) -117.03, -119.42; LRMS (ESI<sup>-</sup>)  $m/z$ : 607.2 ([M - H]<sup>-</sup> 45%); LRMS (ESI<sup>+</sup>)  $m/z$ : 609.2 ([M + H]<sup>+</sup> 13%); HRMS (ESI<sup>+</sup>)  $m/z$ : [M + H]<sup>+</sup> calcd. for  $\text{C}_{33}\text{H}_{35}\text{N}_2\text{O}_7\text{F}_2$ , 609.2407, found 609.2402.

**Diethyl (2S\*,5S\*)-1-(4-(tert-butyl)phenyl)-3-(3-ethoxy-3-oxopropanoyl)-2,5-diphenylimidazolidine-4,4-dicarboxylate 26**

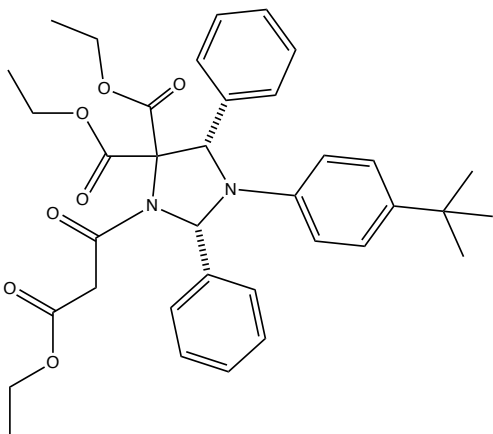

Yield (571 mg, 65%); Yellow foamy solid; m.p. 52-55°C;  $R_f$  (30% EtOAc in Pet. Ether 40:60) 0.40;  $\nu_{\max}/\text{cm}^{-1}$  2963 (C-H), 1742 (C=O), 1669 (C=O);  $\delta_H$  (400 MHz,  $\text{CDCl}_3$ ) 0.95 (3H, t,  $J=7.1$  Hz,  $\text{OCH}_2\text{CH}_3$ ), 1.20 (9H, s,  $\text{C}(\text{CH}_3)_3$ ), 1.22 (3H, t,  $J=7.1$  Hz,  $\text{OCH}_2\text{CH}_3$ ), 1.38 (3H, t,  $J=7.1$  Hz,  $\text{OCH}_2\text{CH}_3$ ), 2.83 (1H, br d,  $J=15.5$  Hz, H7), 3.10 (1H, d,  $J=15.5$  Hz, H7), 3.76 (2H, m,  $\text{OCH}_2\text{CH}_3$ ), 4.09 (2H, q,  $J=7.2$  Hz,  $\text{OCH}_2\text{CH}_3$ ), 4.39 (2H, m,  $\text{OCH}_2\text{CH}_3$ ), 5.45 (1H, s, H4), 6.15 (1H, s, H2), 6.65 (2H, d,  $J=8.8$  Hz, Ar-H), 7.11 (2H, d,  $J=8.8$  Hz, Ar-H), 7.28 (3H, m, Ar-H), 7.42 (5H, m, Ar-H), 7.88 (2H, m, Ar-

H);  $\delta_c$  (101 MHz,  $\text{CDCl}_3$ ) 13.5 ( $\text{OCH}_2\text{CH}_3$ ), 14.2 ( $\text{OCH}_2\text{CH}_3$ ), 31.4 ( $(\text{CH}_3)_3$ ), 34.1 ( $\text{C}(\text{CH}_3)_3$ ), 43.0 (C7), 61.4 ( $\text{OCH}_2\text{CH}_3$ ), 62.0 ( $\text{OCH}_2\text{CH}_3$ ), 62.8 ( $\text{OCH}_2\text{CH}_3$ ), 71.4 (C4), 76.3 (C5), 80.6 (C2), 118.7 (Ar-C), 125.8 (Ar-C), 127.9 (Ar-C), 128.3 (Ar-C), 128.3 (Ar-C), 128.9 (Ar-C), 129.6 (Ar-C), 129.8 (Ar-C), 136.7 (Ar-C), 140.0 (Ar-C), 141.7 (Ar-C), 144.8 (Ar-C), 165.1 (C=O), 165.5 (C=O), 166.4 (C=O), 167.6 (C=O); LRMS ( $\text{ESI}^+$ )  $m/z$ : 615.3 ( $[\text{M} + \text{H}]^+$  25%), 637.2 ( $[\text{M} + \text{Na}]^+$  54%); HRMS ( $\text{ESI}^+$ )  $m/z$ :  $[\text{M} + \text{H}]^+$  calcd. for  $\text{C}_{36}\text{H}_{43}\text{N}_2\text{O}_7$ , 615.3065, found 615.3066.

### General procedure for the synthesis of imidazolidine-derived tetramates:

To a solution of *N*-acylated imidazolidines **21a-l** (1.0 eq.) in anhydrous THF was added DBU (1.1-1.2 eq.). The mixture was stirred overnight at rt. The reaction mixture was then cooled to  $0^\circ\text{C}$ , diluted with water, and partitioned between  $\text{Et}_2\text{O}$  and water and the aqueous layer was acidified to pH 1-2 using 3 M HCl solution (aq.) and extracted with EtOAc. The organic layer was washed with brine, then dried over  $\text{Na}_2\text{SO}_4$ , filtered and concentrated under reduced pressure to yield the desired tetramates **22a-l**, which was then used without further purification.

### Diethyl (1*S*\*,3*S*\*,7*aR*\*)-2-benzyl-7-hydroxy-5-oxo-1,3-diphenyl-2,3-dihydro-1*H*-pyrrolo[1,2-*c*]imidazole-6,7*a*(5*H*)-dicarboxylate **22a**

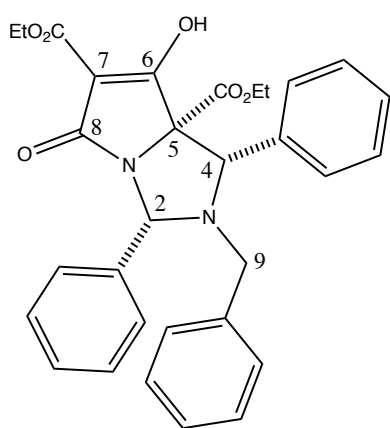

Yield (2.12 g, 77%); Yellow foamy solid; m.p.  $70\text{-}74^\circ\text{C}$ ;  $\nu_{\text{max}}/\text{cm}^{-1}$  2982 (C-H), 1718 (C=O), 1656 (C=O), 1614 (C=C);  $\delta_{\text{H}}$  (500 MHz,  $\text{CDCl}_3$ ) 0.93 (3H, t,  $J=7.1$  Hz,  $\text{OCH}_2\text{CH}_3$ ), 1.35 (3H, t,  $J=7.1$  Hz,  $\text{OCH}_2\text{CH}_3$ ), 3.70 (1H, d,  $J=14.9$  Hz, H9), 3.78 (1H, dq,  $J=7.2$  Hz, 10.5 Hz,  $\text{OCH}_2\text{CH}_3$ ), 3.84 (1H, d,  $J=14.8$  Hz, H9), 3.96 (1H, m,  $\text{OCH}_2\text{CH}_3$ ), 3.96 (1H, s, H4), 4.33 (2H, m,  $\text{OCH}_2\text{CH}_3$ ), 5.30 (1H, s, H2), 6.82 (2H, m, Ar-H), 7.22 (3H, m, Ar-H), 7.37-7.51 (6H, m, Ar-H), 7.61 (2H, d,  $J=7.5$  Hz, Ar-H), 8.00 (2H, d,  $J=7.1$  Hz, Ar-H);  $\delta_c$  (126 MHz,  $\text{CDCl}_3$ ) 13.6

( $\text{OCH}_2\text{CH}_3$ ), 14.2 ( $\text{OCH}_2\text{CH}_3$ ), 50.1 (C9), 62.0 ( $\text{OCH}_2\text{CH}_3$ ), 62.3 ( $\text{OCH}_2\text{CH}_3$ ), 69.8 (C4), 75.7 (C5), 76.4 (C2), 127.9 (Ar-C), 128.5 (Ar-C), 128.5 (Ar-C), 128.8 (Ar-C), 128.8 (Ar-C), 129.1 (Ar-C), 129.2 (Ar-C), 129.4 (Ar-C), 130.5 (Ar-C), 132.5 (Ar-C), 133.7 (Ar-C), 138.4 (Ar-C), 164.7 (C=O), 167.6 (C=O), 185.2 (C6); LRMS ( $\text{ESI}^+$ )  $m/z$ : 549.2 ( $[\text{M} + \text{Na}]^+$

35%); LRMS (ESI<sup>-</sup>) *m/z*: 525.2 ([M - H]<sup>-</sup> 97%); HRMS (ESI<sup>+</sup>) *m/z*: [M + H]<sup>+</sup> calcd. for C<sub>31</sub>H<sub>31</sub>N<sub>2</sub>O<sub>6</sub>, 527.2177, found 527.2179.

**Diethyl (1*S*\*,3*S*\*,7*aR*\*)-2-benzyl-7-hydroxy-5-oxo-1,3-di-*p*-tolyl-2,3-dihydro-1*H*-pyrrolo[1,2-*c*]imidazole-6,7*a*(5*H*)-dicarboxylate 22b**

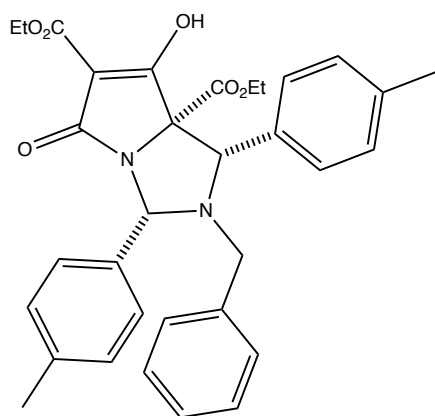

Yield (3.76 g, 75%); Yellow foamy solid; m.p. 91-97°C;  $\nu_{\max}/\text{cm}^{-1}$  2982 (C-H), 1723 (C=O), 1656 (C=O), 1614 (C=C);  $\delta_{\text{H}}$  (400 MHz, CDCl<sub>3</sub>) 1.00 (3H, t, *J*=7.1 Hz, OCH<sub>2</sub>CH<sub>3</sub>), 1.35 (3H, t, *J*=7.2 Hz, OCH<sub>2</sub>CH<sub>3</sub>), 2.42 (3H, s, CH<sub>3</sub>), 2.44 (3H, s, CH<sub>3</sub>), 3.69 (1H, d, *J*=14.7 Hz, H<sub>9</sub>), 3.85 (1H, m, H<sub>9</sub>), 3.85 (1H, m, OCH<sub>2</sub>CH<sub>3</sub>), 3.90 (1H, s, H<sub>4</sub>), 4.01 (1H, dq, *J*=7.1 Hz, 10.7 Hz, OCH<sub>2</sub>CH<sub>3</sub>), 4.32 (2H, m, OCH<sub>2</sub>CH<sub>3</sub>), 5.25 (1H, s, H<sub>2</sub>), 6.83 (2H, m, Ar-H), 7.22-7.36 (7H, m, Ar-H), 7.49 (2H, d, *J*=7.7 Hz, Ar-H), 7.90 (2H, d, *J*=8.1 Hz, Ar-H);  $\delta_{\text{C}}$

(101 MHz, CDCl<sub>3</sub>) 13.7 (OCH<sub>2</sub>CH<sub>3</sub>), 14.2 (OCH<sub>2</sub>CH<sub>3</sub>), 21.4 (CH<sub>3</sub>), 21.4 (CH<sub>3</sub>), 49.5 (C<sub>9</sub>), 61.8 (OCH<sub>2</sub>CH<sub>3</sub>), 62.3 (OCH<sub>2</sub>CH<sub>3</sub>), 69.4 (C<sub>4</sub>), 76.0 (C<sub>2</sub>), 127.8 (Ar-C), 128.4 (Ar-C), 129.0 (Ar-C), 129.1 (Ar-C), 129.3 (Ar-C), 129.5 (Ar-C), 130.5 (Ar-C), 132.3 (Ar-C), 135.3 (Ar-C), 138.4 (Ar-C), 139.0 (Ar-C), 164.8 (C=O), 167.5 (C=O), 185.3 (C<sub>6</sub>); LRMS (ESI<sup>-</sup>) *m/z*: 553.2 ([M - H]<sup>-</sup> 97%); HRMS (ESI<sup>-</sup>) *m/z*: [M - H]<sup>-</sup> calcd. for C<sub>33</sub>H<sub>33</sub>N<sub>2</sub>O<sub>6</sub>, 553.2344, found 553.2339.

**Diethyl (1*S*\*,3*S*\*,7*aR*\*)-2-benzyl-7-hydroxy-1,3-bis(4-methoxyphenyl)-5-oxo-2,3-dihydro-1*H*-pyrrolo[1,2-*c*]imidazole-6,7*a*(5*H*)-dicarboxylate 22c**

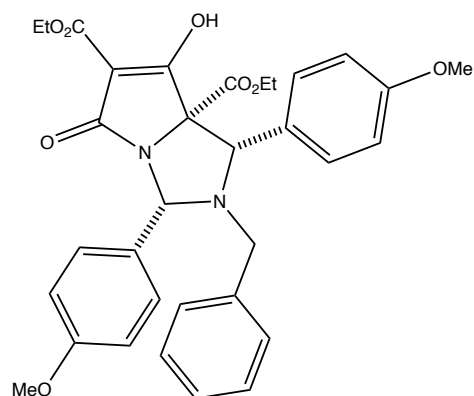

Yield (2.17 g, 78%); Yellow sticky solid/oil; m.p. 81-85°C;  $\nu_{\max}/\text{cm}^{-1}$  2980 (C-H), 1736 (C=O), 1685 (C=O), 1600 (C=C);  $\delta_{\text{H}}$  (400 MHz, CDCl<sub>3</sub>) 1.01 (3H, t, *J*=7.1 Hz, OCH<sub>2</sub>CH<sub>3</sub>), 1.34 (3H, t, *J*=7.1 Hz, OCH<sub>2</sub>CH<sub>3</sub>), 3.66 (1H, d, *J*=14.8 Hz, H<sub>9</sub>), 3.80 (1H, d, *J*=14.3 Hz, H<sub>9</sub>), 3.83 (1H, m, OCH<sub>2</sub>CH<sub>3</sub>), 3.85 (3H, s, OCH<sub>3</sub>), 3.88 (4H, m, OCH<sub>3</sub>, H<sub>4</sub>), 4.01 (1H, m, OCH<sub>2</sub>CH<sub>3</sub>), 4.30 (2H, m, OCH<sub>2</sub>CH<sub>3</sub>), 5.20 (1H, s, H<sub>2</sub>), 6.80 (2H, m, Ar-H), 6.98-7.02 (4H, m, Ar-H), 7.19-7.25 (3H, m, Ar-H), 7.50 (2H, d, *J*=8.2

Hz, Ar-H), 7.91 (2H, d, *J*=8.7 Hz, Ar-H);  $\delta_{\text{C}}$  (101 MHz, CDCl<sub>3</sub>) 13.8 (OCH<sub>2</sub>CH<sub>3</sub>), 14.2 (OCH<sub>2</sub>CH<sub>3</sub>), 49.5 (C<sub>9</sub>), 55.4

(OCH<sub>3</sub>), 61.8 (OCH<sub>2</sub>CH<sub>3</sub>), 62.3 (OCH<sub>2</sub>CH<sub>3</sub>), 69.2 (C<sub>4</sub>), 75.7 (C<sub>5</sub>), 76.0 (C<sub>2</sub>), 113.8 (Ar-C), 114.2 (Ar-C), 125.4 (Ar-C), 127.8 (Ar-C), 128.4 (Ar-C), 130.2 (Ar-C), 130.5 (Ar-C), 130.7 (Ar-C), 132.1 (Ar-C), 132.4 (Ar-C), 160.0 (Ar-C), 160.2 (Ar-C), 165.0 (C=O), 167.5 (C=O), 185.4 (C<sub>6</sub>); LRMS (ESI<sup>-</sup>) *m/z*: 585.2 ([M - H]<sup>-</sup> 96%); HRMS (ESI<sup>-</sup>) *m/z*: [M - H]<sup>-</sup> calcd. for C<sub>33</sub>H<sub>33</sub>N<sub>2</sub>O<sub>8</sub>, 585.2231, found 585.2243.

**Diethyl (1*S*\*,3*S*\*,7*aR*\*)-2-benzyl-1,3-bis(4-fluorophenyl)-7-hydroxy-5-oxo-2,3-dihydro-1*H*-pyrrolo[1,2-*c*]imidazole-6,7*a*(5*H*)-dicarboxylate 22d**

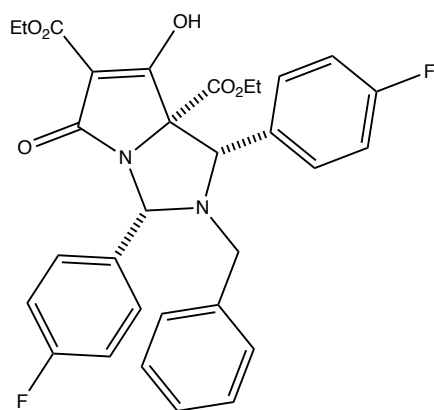

Yield (3.94 g, 77%); Yellow foamy solid; m.p. 95-99°C;  $\nu_{\max}/\text{cm}^{-1}$  2984 (C-H), 1723 (C=O), 1658 (C=O), 1606 (C=C);  $\delta_{\text{H}}$  (400 MHz, CDCl<sub>3</sub>) 0.97 (3H, t, *J*=7.2 Hz, OCH<sub>2</sub>CH<sub>3</sub>), 1.35 (3H, t, *J*=7.2 Hz, OCH<sub>2</sub>CH<sub>3</sub>), 3.67 (1H, d, *J*=14.6 Hz, H<sub>9</sub>), 3.77 (1H, d, *J*=14.6 Hz, H<sub>9</sub>), 3.82 (1H, m, OCH<sub>2</sub>CH<sub>3</sub>), 3.93 (1H, s, H<sub>4</sub>), 3.97 (1H, dq, *J*=7.3 Hz, 10.9 Hz, OCH<sub>2</sub>CH<sub>3</sub>), 4.33 (2H, m, OCH<sub>2</sub>CH<sub>3</sub>), 5.26 (1H, s, H<sub>2</sub>), 6.79 (2H, m, Ar-H), 7.08-7.26 (7H, m, Ar-H), 7.57 (2H, m, Ar-H), 7.94 (2H, m, Ar-H);  $\delta_{\text{C}}$  (101 MHz, CDCl<sub>3</sub>) 13.7 (OCH<sub>2</sub>CH<sub>3</sub>), 14.2

(OCH<sub>2</sub>CH<sub>3</sub>), 50.4 (C<sub>9</sub>), 62.0 (OCH<sub>2</sub>CH<sub>3</sub>), 62.4 (OCH<sub>2</sub>CH<sub>3</sub>), 69.2 (C<sub>4</sub>), 76.0 (C<sub>2</sub>), 115.3 (d, *J*=21.3 Hz, Ar-C), 115.9 (d, *J*=21.5 Hz, Ar-C), 128.1 (Ar-C), 128.6 (Ar-C), 129.3 (d, *J*=3.3 Hz, Ar-C), 130.3 (Ar-C), 130.8 (Ar-C), 131.1 (d, *J*=8.1 Hz, Ar-C), 132.3 (Ar-C), 134.1 (Ar-C), 163.1 (d, *J*=246.6 Hz, Ar-C), 163.2 (d, *J*=248.2 Hz, Ar-C), 164.7 (C=O), 167.5 (C=O), 185.1 (C<sub>6</sub>);  $\delta_{\text{F}}$  (377 MHz, CDCl<sub>3</sub>) -112.18, -113.71; LRMS (ESI<sup>-</sup>) *m/z*: 561.1 ([M - H]<sup>-</sup> 100%); HRMS (ESI<sup>-</sup>) *m/z*: [M - H]<sup>-</sup> calcd. for C<sub>31</sub>H<sub>27</sub>N<sub>2</sub>O<sub>6</sub>F<sub>2</sub>, 561.1843, found 561.1832.

**Diethyl (1*S*\*,3*S*\*,7*aR*\*)-2-benzyl-1,3-bis(4-chlorophenyl)-7-hydroxy-5-oxo-2,3-dihydro-1*H*-pyrrolo[1,2-*c*]imidazole-6,7*a*(5*H*)-dicarboxylate 22e**

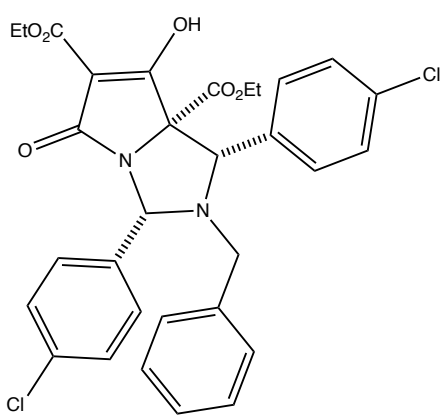

Yield (1.06 g, 75%); Yellow foamy solid; m.p. 88-91°C;  $\nu_{\max}/\text{cm}^{-1}$  2983 (C-H), 1746 (C=O), 1721 (C=O), 1658 (C=O), 1616 (C=C);  $\delta_{\text{H}}$  (400 MHz,  $\text{CDCl}_3$ ) 0.97 (3H, t,  $J=7.2$  Hz,  $\text{OCH}_2\text{CH}_3$ ), 1.35 (3H, t,  $J=7.1$  Hz,  $\text{OCH}_2\text{CH}_3$ ), 3.66 (1H, d,  $J=14.6$  Hz, H9), 3.77 (1H, d,  $J=14.8$  Hz, H9), 3.82 (1H, m,  $\text{OCH}_2\text{CH}_3$ ), 3.92 (1H, s, H4), 3.98 (1H, m,  $\text{OCH}_2\text{CH}_3$ ), 4.32 (2H, m,  $\text{OCH}_2\text{CH}_3$ ), 5.27 (1H, s, H2), 6.79 (2H, m, Ar-H), 7.23 (3H, m, Ar-H), 7.41 (2H, d,  $J=8.5$  Hz, Ar-H), 7.46 (2H, d,  $J=8.6$  Hz, Ar-H), 7.52 (2H, d,  $J=8.2$  Hz,

Ar-H), 7.88 (2H, d,  $J=8.5$  Hz, Ar-H);  $\delta_{\text{C}}$  (101 MHz,  $\text{CDCl}_3$ ) 13.7 ( $\text{OCH}_2\text{CH}_3$ ), 14.2 ( $\text{OCH}_2\text{CH}_3$ ), 50.6 (C9), 62.0 ( $\text{OCH}_2\text{CH}_3$ ), 62.5 ( $\text{OCH}_2\text{CH}_3$ ), 69.3 (C4), 75.5 (C5), 75.9 (C2), 128.1 (Ar-C), 128.6 (Ar-C), 128.6 (Ar-C), 129.1 (Ar-C), 130.3 (Ar-C), 130.7 (Ar-C), 132.3 (Ar-C), 134.5 (Ar-C), 135.1 (Ar-C), 137.0 (Ar-C), 164.7 (C=O), 167.4 (C=O), 185.2 (C6); LRMS (ESI<sup>-</sup>)  $m/z$ : 593.0 ( $[\text{M}^{35+35} - \text{H}]^-$  100%), 595.0 ( $[\text{M}^{35+37} - \text{H}]^-$  69%), 597.1 ( $[\text{M}^{37+37} - \text{H}]^-$  22%); HRMS (ESI<sup>+</sup>)  $m/z$ :  $[\text{M}^{35+35} + \text{H}]^+$  calcd. for  $\text{C}_{31}\text{H}_{29}\text{N}_2\text{O}_6\text{Cl}_2$ , 595.1397, found 595.1399;  $[\text{M}^{35+37} + \text{H}]^+$  calcd. for  $\text{C}_{31}\text{H}_{29}\text{N}_2\text{O}_6\text{Cl}_2$ , 597.1373, found 597.1362;  $[\text{M}^{37+37} + \text{H}]^+$  calcd. for  $\text{C}_{31}\text{H}_{29}\text{N}_2\text{O}_6\text{Cl}_2$ , 599.1360, found 599.1323.

**Diethyl (1S\*,3S\*,7aR\*)-2-benzyl-1,3-bis(4-bromophenyl)-7-hydroxy-5-oxo-2,3-dihydro-1H-pyrrolo[1,2-c]imidazole-6,7a(5H)-dicarboxylate 22f**

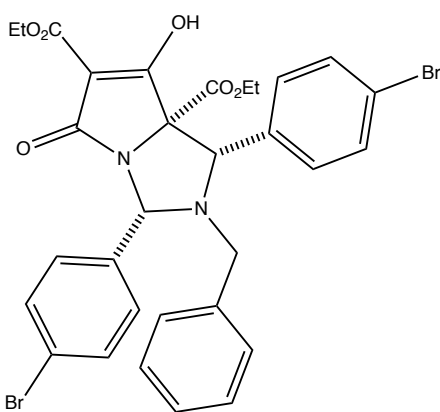

Yield (2.95 g, 55%); Yellow foamy solid; m.p. 85-90°C;  $\nu_{\max}/\text{cm}^{-1}$  2983 (C-H), 1745 (C=O), 1721 (C=O), 1658 (C=O), 1616 (C=C);  $\delta_{\text{H}}$  (400 MHz,  $\text{CDCl}_3$ ) 0.96 (3H, t,  $J=7.1$  Hz,  $\text{OCH}_2\text{CH}_3$ ), 1.35 (3H, t,  $J=7.1$  Hz,  $\text{OCH}_2\text{CH}_3$ ), 3.67 (1H, d,  $J=14.6$  Hz, H9), 3.77 (1H, d,  $J=14.7$  Hz, H9), 3.82 (1H, m,  $\text{OCH}_2\text{CH}_3$ ), 3.91 (1H, s, H4), 3.97 (1H, m,  $\text{OCH}_2\text{CH}_3$ ), 4.34 (2H, m,  $\text{OCH}_2\text{CH}_3$ ), 5.25 (1H, s, H2), 6.79 (2H, m, Ar-H), 7.23 (3H, m, Ar-H), 7.47 (2H, d,  $J=8.1$  Hz, Ar-H), 7.56 (2H, d,  $J=8.4$  Hz, Ar-H), 7.62 (2H, d,  $J=8.7$  Hz,

Ar-H), 7.82 (2H, d,  $J=8.5$  Hz, Ar-H);  $\delta_{\text{C}}$  (101 MHz,  $\text{CDCl}_3$ ) 13.7 ( $\text{OCH}_2\text{CH}_3$ ), 14.2 ( $\text{OCH}_2\text{CH}_3$ ), 50.6 (C9), 62.1 ( $\text{OCH}_2\text{CH}_3$ ), 62.5 ( $\text{OCH}_2\text{CH}_3$ ), 69.4 (C4), 75.3 (C5), 75.9 (C2), 122.8 (Ar-C), 123.3 (Ar-C), 128.2 (Ar-C), 128.7 (Ar-C), 130.3 (Ar-C), 130.7 (Ar-C), 131.0 (Ar-C), 131.6 (Ar-C), 132.1 (Ar-C), 132.6 (Ar-C), 137.4 (Ar-C), 164.4 (C=O), 167.4 (C=O), 169.2 (C=O), 184.9 (C6); LRMS (ESI<sup>-</sup>)  $m/z$ : 681.0 ( $[\text{M}^{79+79} - \text{H}]^-$  46%), 683.0 ( $[\text{M}^{79+81} - \text{H}]^-$  95%), 685.0 ( $[\text{M}^{81+81}$

– H]<sup>-</sup> 51%); HRMS (ESI<sup>-</sup>) *m/z*: [M<sup>79+79</sup> – H]<sup>-</sup> calcd. for C<sub>31</sub>H<sub>27</sub>N<sub>2</sub>O<sub>6</sub>Br<sub>2</sub>, 681.0241, found 681.0242; [M<sup>79+81</sup> – H]<sup>-</sup> calcd. for C<sub>31</sub>H<sub>27</sub>N<sub>2</sub>O<sub>6</sub>Br<sub>2</sub>, 683.0221, found 683.0225; [M<sup>81+81</sup> – H]<sup>-</sup> calcd. for C<sub>31</sub>H<sub>27</sub>N<sub>2</sub>O<sub>6</sub>Br<sub>2</sub>, 685.0200, found 685.0996.

**Diethyl (1*S*\*,3*S*\*,7*aR*\*)-2-benzyl-7-hydroxy-1,3-di(naphthalen-1-yl)-5-oxo-2,3-dihydro-1*H*-pyrrolo[1,2-*c*]imidazole-6,7*a*(5*H*)-dicarboxylate 22f**

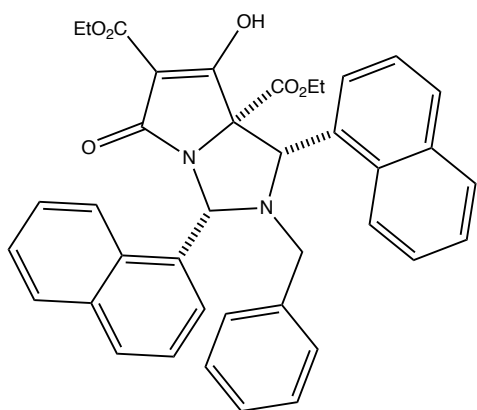

Yield (851 mg, 61%); Yellow foamy solid; m.p. 108-111°C;  $\nu_{\max}/\text{cm}^{-1}$  3055 (C-H), 2982 (C-H), 1746 (C=O), 1721 (C=O), 1656 (C=O), 1618 (C=C);  $\delta_{\text{H}}$  (400 MHz, CDCl<sub>3</sub>) 0.89 (3H, br m, OCH<sub>2</sub>CH<sub>3</sub>), 1.34 (3H, t, *J*=7.1 Hz, OCH<sub>2</sub>CH<sub>3</sub>), 3.52 (1H, d, *J*=14.7 Hz, H9), 3.81 (2H, m, OCH<sub>2</sub>CH<sub>3</sub>, H9), 4.03 (1H, m, OCH<sub>2</sub>CH<sub>3</sub>), 4.35 (2H, m, OCH<sub>2</sub>CH<sub>3</sub>), 4.91 (1H, s, H4), 6.25 (1H, s, H2), 6.55-9.04 (19H, m, Ar-H);  $\delta_{\text{C}}$  (101 MHz, CDCl<sub>3</sub>) 13.6 (OCH<sub>2</sub>CH<sub>3</sub>), 14.3 (OCH<sub>2</sub>CH<sub>3</sub>), 50.1 (C9), 61.8 (OCH<sub>2</sub>CH<sub>3</sub>), 62.3 (OCH<sub>2</sub>CH<sub>3</sub>), 64.7 (C4), 71.3 (C2), 123.0-136.8 (Ar-C), 167.4 (C=O); LRMS (ESI<sup>-</sup>) *m/z*: 625.2 ([M – H]<sup>-</sup> 97%); HRMS (ESI<sup>+</sup>) *m/z*: [M + H]<sup>+</sup> calcd. for C<sub>39</sub>H<sub>35</sub>N<sub>2</sub>O<sub>6</sub>, 627.2490, found 627.2495.

**Diethyl (1*S*\*,3*S*\*,7*aR*\*)-2-benzyl-7-hydroxy-1,3-bis(4-nitrophenyl)-5-oxo-2,3-dihydro-1*H*-pyrrolo[1,2-*c*]imidazole-6,7*a*(5*H*)-dicarboxylate 22h**

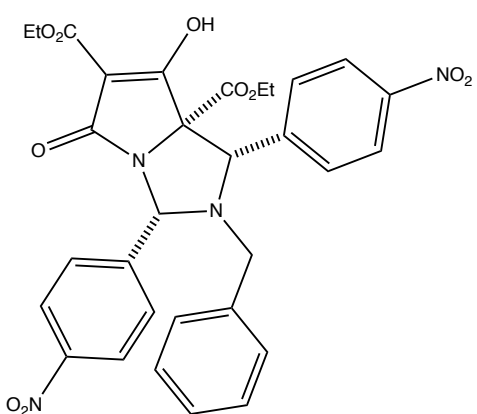

Yield (1.24 g, 83%); Orange foamy solid; m.p. 125-128°C;  $\nu_{\max}/\text{cm}^{-1}$  1723 (C=O), 1608 (C=C);  $\delta_{\text{H}}$  (400 MHz, CDCl<sub>3</sub>) 0.90 (3H, t, *J*=7.2 Hz, OCH<sub>2</sub>CH<sub>3</sub>), 1.39 (3H, t, *J*=7.1 Hz, OCH<sub>2</sub>CH<sub>3</sub>), 3.75 (3H, m, OCH<sub>2</sub>CH<sub>3</sub>, H9), 3.95 (1H, dq, *J*=7.1 Hz, 10.8 Hz, OCH<sub>2</sub>CH<sub>3</sub>), 4.15 (1H, s, H4), 4.39 (2H, m, OCH<sub>2</sub>CH<sub>3</sub>), 5.48 (1H, s, H2), 6.83 (2H, m, Ar-H), 7.21 (3H, m, Ar-H), 7.83 (2H, d, *J*=8.4 Hz, Ar-H), 8.05 (2H, d, *J*=8.8 Hz, Ar-H), 8.25 (2H, d, *J*=8.8 Hz, Ar-H), 8.36 (2H, d, *J*=9.0 Hz, Ar-H);  $\delta_{\text{C}}$  (101 MHz, CDCl<sub>3</sub>) 13.7 (OCH<sub>2</sub>CH<sub>3</sub>), 14.2 (OCH<sub>2</sub>CH<sub>3</sub>), 52.9 (C9), 62.4 (OCH<sub>2</sub>CH<sub>3</sub>), 62.8 (OCH<sub>2</sub>CH<sub>3</sub>), 70.1 (C4), 75.2 (C5), 76.1 (C2), 123.6 (Ar-C), 124.0 (Ar-C), 128.5 (Ar-C), 128.9 (Ar-C), 129.9 (Ar-C), 130.0 (Ar-C), 130.2 (Ar-C), 132.3 (Ar-C), 140.9 (Ar-C),

148.1 (Ar-C), 148.6 (Ar-C), 163.9 (C=O), 167.3 (C=O), 184.6 (C6); LRMS (ESI<sup>-</sup>)  $m/z$ : 615.1 ([M - H]<sup>-</sup> 98%); HRMS (ESI<sup>-</sup>)  $m/z$ : [M - H]<sup>-</sup> calcd. for C<sub>31</sub>H<sub>27</sub>N<sub>4</sub>O<sub>10</sub>, 615.1733, found 615.1732.

**Diethyl (1S\*,3S\*,7aR\*)-2-benzyl-1,3-bis(4-cyanophenyl)-7-hydroxy-5-oxo-2,3-dihydro-1H-pyrrolo[1,2-c]imidazole-6,7a(5H)-dicarboxylate 22j**

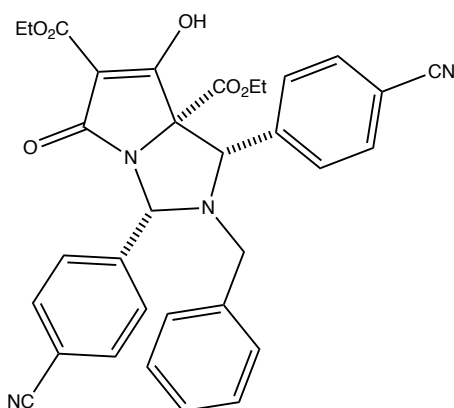

Yield (509 mg, 85%); Pale orange oil that solidified overnight; m.p. 79-83°C;  $\nu_{\max}/\text{cm}^{-1}$  2984 (C-H), 2229 (C≡N), 1749 (C=O), 1713 (C=O), 1660 (C=O), 1610 (C=C);  $\delta_{\text{H}}$  (400 MHz, CDCl<sub>3</sub>) 0.88 (3H, t,  $J=7.1$  Hz, OCH<sub>2</sub>CH<sub>3</sub>), 1.37 (3H, t,  $J=7.1$  Hz, OCH<sub>2</sub>CH<sub>3</sub>), 3.72 (2H, s, H9), 3.77-3.99 (2H, m, OCH<sub>2</sub>CH<sub>3</sub>), 4.05 (1H, s, H4), 4.36 (2H, m, OCH<sub>2</sub>CH<sub>3</sub>), 5.39 (1H, s, H2), 6.79 (2H, m, Ar-H), 7.21 (3H, m, Ar-H), 7.68 (2H, m, Ar-H), 7.72 (2H, m, Ar-H), 7.78 (2H, m, Ar-H), 7.98 (2H, m, Ar-H);  $\delta_{\text{C}}$  (101 MHz, CDCl<sub>3</sub>) 13.6

(OCH<sub>2</sub>CH<sub>3</sub>), 14.2 (OCH<sub>2</sub>CH<sub>3</sub>), 52.6 (C9), 62.3 (OCH<sub>2</sub>CH<sub>3</sub>), 62.7 (OCH<sub>2</sub>CH<sub>3</sub>), 70.2 (C4), 76.3 (C2), 112.4 (Ar-C), 113.2 (Ar-C), 118.4 (C≡N), 118.9 (C≡N), 128.5 (Ar-C), 128.8 (Ar-C), 129.7 (Ar-C), 129.8 (Ar-C), 130.2 (Ar-C), 132.2 (Ar-C), 132.3 (Ar-C), 132.6 (Ar-C), 139.2 (Ar-C), 143.8 (Ar-C), 167.3 (C=O), 184.6 (C6); LRMS (ESI<sup>-</sup>)  $m/z$ : 575.2 ([M - H]<sup>-</sup> 96%); HRMS (ESI<sup>+</sup>)  $m/z$ : [M + H]<sup>+</sup> calcd. for C<sub>33</sub>H<sub>29</sub>N<sub>4</sub>O<sub>6</sub>, 577.2082, found 577.2080.

**Diethyl (1S\*,3S\*,7aR\*)-2-benzyl-1,3-bis(3-bromophenyl)-7-hydroxy-5-oxo-2,3-dihydro-1H-pyrrolo[1,2-c]imidazole-6,7a(5H)-dicarboxylate 22k**

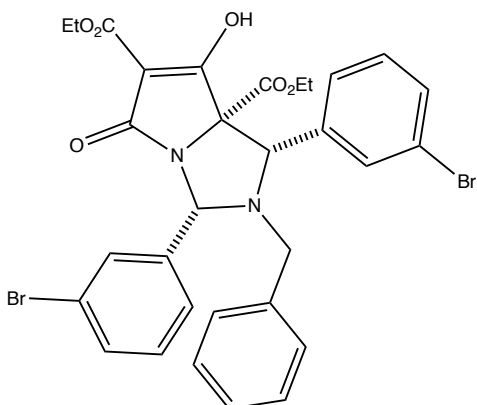

Yield (560 mg, 70%); Yellow foamy solid; m.p. 81-84°C;  $\nu_{\max}/\text{cm}^{-1}$  2983 (C-H), 1747 (C=O), 1720 (C=O), 1658 (C=O), 1617 (C=C);  $\delta_{\text{H}}$  (400 MHz, CDCl<sub>3</sub>) 0.97 (3H, t,  $J=7.2$  Hz, OCH<sub>2</sub>CH<sub>3</sub>), 1.28 (3H, t,  $J=7.1$  Hz, OCH<sub>2</sub>CH<sub>3</sub>), 3.63 (1H, d,  $J=14.7$  Hz, H9), 3.71 (1H, d,  $J=14.6$  Hz, H9), 3.79 (1H, m, OCH<sub>2</sub>CH<sub>3</sub>), 3.84 (1H, s, H4), 3.94 (1H, m, OCH<sub>2</sub>CH<sub>3</sub>), 4.26 (2H, m, OCH<sub>2</sub>CH<sub>3</sub>), 5.18 (1H, s, H2), 6.75 (2H, m, Ar-H), 7.15-7.31 (6H, m, Ar-H), 7.42 (2H, m, Ar-H), 7.50 (1H, m, Ar-H), 7.78 (1H, m, Ar-H),

8.00 (1H, m, Ar-H);  $\delta_{\text{C}}$  (101 MHz, CDCl<sub>3</sub>) 13.8 (OCH<sub>2</sub>CH<sub>3</sub>), 14.2 (OCH<sub>2</sub>CH<sub>3</sub>), 51.2 (C9), 62.1 (OCH<sub>2</sub>CH<sub>3</sub>), 62.7



(OCH<sub>2</sub>CH<sub>3</sub>), 69.5 (C4), 75.4 (C5), 76.1 (C2), 122.5 (Ar-C), 123.0 (Ar-C), 128.0 (Ar-C), 128.2 (Ar-C), 128.7 (Ar-C), 130.0 (Ar-C), 130.3 (Ar-C), 130.4 (Ar-C), 131.9 (Ar-C), 132.1 (Ar-C), 132.3 (Ar-C), 132.4 (Ar-C), 136.0 (Ar-C), 140.8 (Ar-C), 164.4 (C=O), 167.3 (C=O), 185.0 (C6); LRMS (ESI<sup>-</sup>) *m/z*: 681.0 ([M<sup>79+79</sup> - H]<sup>-</sup> 49%), 683.0 ([M<sup>79+81</sup> - H]<sup>-</sup> 97%), 685.0 ([M<sup>81+81</sup> - H]<sup>-</sup> 51%); HRMS (ESI<sup>+</sup>) *m/z*: [M<sup>79+79</sup> + H]<sup>+</sup> calcd. for C<sub>31</sub>H<sub>29</sub>N<sub>2</sub>O<sub>6</sub>Br<sub>2</sub>, 683.0374, found 683.0392; [M<sup>79+81</sup> + H]<sup>+</sup> calcd. for C<sub>31</sub>H<sub>29</sub>N<sub>2</sub>O<sub>6</sub>Br<sub>2</sub>, 685.0355, found 685.0364; [M<sup>81+81</sup> + H]<sup>+</sup> calcd. for C<sub>31</sub>H<sub>29</sub>N<sub>2</sub>O<sub>6</sub>Br<sub>2</sub>, 687.0341, found 687.0342.

### General procedure for the synthesis of C5 and C7-carboxamidotetramic acids:<sup>9,10</sup>

To a solution of tetramic acids **22a-b, f, k** (1.0 eq.) in anhydrous toluene was added 1-adamantylamine (1.2 eq.). The mixture was heated at reflux overnight. Then the reaction mixture was concentrated *in-vacuo* and purified by flash column chromatography to yield tetramates that were chelated with metals. The product was then redissolved in DCM, washed with 10% citric acid solution (aq.), dried over Na<sub>2</sub>SO<sub>4</sub>, filtered and concentrated under reduced pressure to yield the desired carboxamides **23a-b, 24a-c**.

### Ethyl (1S\*,3S\*,7aR\*)-7a-(adamantan-1-ylcarbamoyl)-2-benzyl-7-hydroxy-5-oxo-1,3-diphenyl-2,3,5,7a-tetrahydro-1H-pyrrolo[1,2-c]imidazole-6-carboxylate **23a**

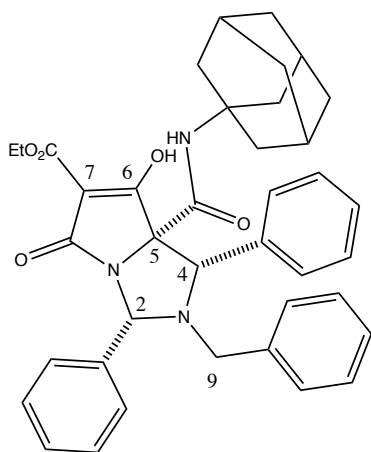

Yield (56 mg, 21%); Orange oil; R<sub>f</sub> (50% EtOAc in Pet. Ether 40:60) 0.38; *v*<sub>max</sub>/cm<sup>-1</sup> 2910 (C-H), 2852 (C-H), 1743 (C=O), 1689 (C=O), 1626 (C=C); AB:CD 62:38 by δ<sub>H</sub>-NMR; δ<sub>H</sub> (Major tautomer) (400 MHz, CDCl<sub>3</sub>) 1.23 (3H, t, *J*=7.0 Hz, OCH<sub>2</sub>CH<sub>3</sub>), 1.64-1.68 (6H, br m, Adamantyl-CH<sub>2</sub>), 1.88-2.02 (6H, br m, Adamantyl-CH<sub>2</sub>), 2.08 (3H, br m, Adamantyl-H), 3.48 (1H, d, *J*=13.7 Hz, H9), 3.75 (1H, d, *J*=13.6 Hz, H9), 4.31 (2H, m, OCH<sub>2</sub>CH<sub>3</sub>), 5.08 (1H, s, H4), 5.87 (1H, s, H2), 6.99 (2H, m, Ar-H), 7.04 (2H, m, Ar-H), 7.20-7.50 (9H, m, Ar-H), 7.68 (2H,

m, Ar-H), 10.27 (1H, br s, NH/OH); δ<sub>C</sub> (Major tautomer) (101 MHz, CDCl<sub>3</sub>) 14.2 (OCH<sub>2</sub>CH<sub>3</sub>), 29.3 (Adamantyl-C), 36.1 (Adamantyl-C), 41.6 (Adamantyl-C), 49.9 (C9), 53.5 (Adamantyl-C), 62.9 (OCH<sub>2</sub>CH<sub>3</sub>), 65.4 (C4), 77.7 (C2), 79.2 (C5), 95.3 (C7), 127.1 (Ar-C), 128.1 (Ar-C), 128.2 (Ar-C), 128.3 (Ar-C), 128.4 (Ar-C), 128.5 (Ar-C), 128.7 (Ar-C), 128.8 (Ar-C), 129.0 (Ar-C), 134.8 (Ar-C), 137.5 (Ar-C), 139.6 (Ar-C), 165.9 (C=O), 168.1 (C=O), 174.0 (C=O), 186.5

(C6); LRMS (ESI<sup>-</sup>) *m/z*: 630.2 ([M – H]<sup>-</sup> 95%); HRMS (ESI<sup>-</sup>) *m/z*: [M – H]<sup>-</sup> calcd. for C<sub>39</sub>H<sub>40</sub>N<sub>3</sub>O<sub>5</sub>, 630.2973, found 630.2967.

**Ethyl (1*S*\*,3*S*\*,7*aR*\*)-7*a*-(adamantan-1-ylcarbamoyl)-2-benzyl-7-hydroxy-5-oxo-1,3-di-*p*-tolyl-2,3,5,7*a*-tetrahydro-1*H*-pyrrolo[1,2-*c*]imidazole-6-carboxylate 23b**

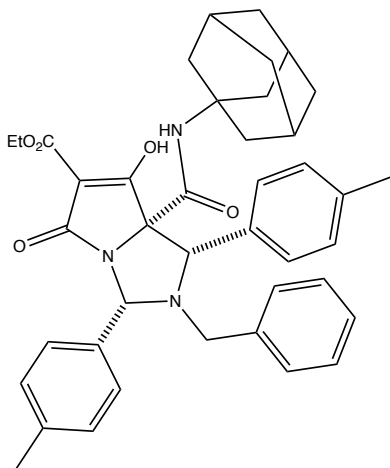

Yield (300 mg, 36%); Brown foamy solid; m.p. 108-111°C; R<sub>f</sub> (30% EtOAc in Pet. Ether 40:60) 0.68;  $\nu_{\text{max}}/\text{cm}^{-1}$  3308 (O-H), 2909 (C-H), 2852 (C-H), 1742 (C=O), 1686 (C=O), 1625 (C=C); AB:CD 69:31 by  $\delta_{\text{H}}$ -NMR;  $\delta_{\text{H}}$  (Major tautomer) (400 MHz, CDCl<sub>3</sub>) 1.25 (3H, t, *J*=7.1 Hz, OCH<sub>2</sub>CH<sub>3</sub>), 1.66-1.68 (6H, br m, Adamantyl-CH<sub>2</sub>), 1.97-2.01 (6H, br m, Adamantyl-CH<sub>2</sub>) 2.09 (3H, br s, Adamantyl-CH), 2.33 (3H, s, CH<sub>3</sub>), 2.36 (3H, s, CH<sub>3</sub>), 3.40 (1H, d, *J*=13.7 Hz, H<sub>9</sub>), 3.69 (1H, d, *J*=13.7 Hz, H<sub>9</sub>), 4.31 (2H, m, OCH<sub>2</sub>CH<sub>3</sub>), 5.01 (1H, s, H<sub>4</sub>), 5.77 (1H, s, H<sub>2</sub>), 6.70

(1H, br s, NH/OH), 6.85 (2H, d, *J*=7.5 Hz, Ar-H), 7.04 (2H, d, *J*=7.2 Hz, Ar-H), 7.08 (2H, d, *J*=7.7 Hz, Ar-H), 7.20-7.25 (5H, m, Ar-H), 7.44 (1H, br s, NH/OH), 7.53 (2H, d, *J*=8.1 Hz, Ar-H);  $\delta_{\text{C}}$  (Major tautomer) (101 MHz, CDCl<sub>3</sub>) 14.2 (OCH<sub>2</sub>CH<sub>3</sub>), 21.3 (CH<sub>3</sub>), 21.3 (CH<sub>3</sub>), 29.4 (Adamantyl-C), 36.1 (Adamantyl-C), 41.7 (Adamantyl-C), 49.9 (C<sub>9</sub>), 53.4 (Adamantyl-C), 62.8 (OCH<sub>2</sub>CH<sub>3</sub>), 65.1 (C<sub>4</sub>), 77.5 (C<sub>2</sub>), 79.2 (C<sub>5</sub>), 96.0 (C<sub>7</sub>), 127.1 (Ar-C), 128.2 (Ar-C), 128.2 (Ar-C), 128.4 (Ar-C), 129.0 (Ar-C), 129.2 (Ar-C), 129.3 (Ar-C), 136.6 (Ar-C), 138.6 (Ar-C), 166.0 (C=O), 168.2 (C=O), 174.0 (C=O), 186.1 (C<sub>6</sub>); LRMS (ESI<sup>-</sup>) *m/z*: 658.2 ([M – H]<sup>-</sup> 97%); HRMS (ESI<sup>-</sup>) *m/z*: [M – H]<sup>-</sup> calcd. for C<sub>41</sub>H<sub>44</sub>N<sub>3</sub>O<sub>5</sub>, 658.3286, found 658.3295.

**Ethyl (1*S*\*,3*S*\*,7*aR*\*)-6-(adamantan-1-ylcarbamoyl)-2-benzyl-7-hydroxy-5-oxo-1,3-diphenyl-2,3-dihydro-1*H*-pyrrolo[1,2-*c*]imidazole-7*a*(5*H*)-carboxylate 24a**

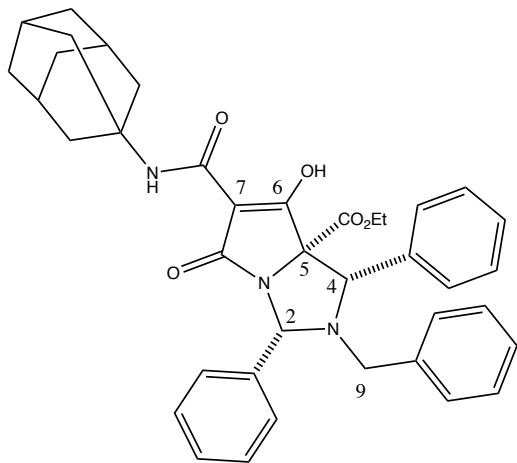

Yield (365 mg, 31%); Yellow foamy solid; m.p. 105-108°C;  $R_f$  (30% EtOAc in Pet. Ether 40:60) 0.85;  $\nu_{\max}/\text{cm}^{-1}$  3310 (O-H), 2909 (C-H), 2852 (C-H), 1743 (C=O), 1692 (C=O), 1625 (C=C); AB:CD 67:33 by  $\delta_{\text{H-NMR}}$ ;  $\delta_{\text{H}}$  (Major tautomer) (400 MHz,  $\text{CDCl}_3$ ) 0.92 (3H, t,  $J=7.2$  Hz,  $\text{OCH}_2\text{CH}_3$ ), 1.67-1.68 (6H, br m, Adamantyl- $\text{CH}_2$ ), 2.01-2.11 (9H, br m, Adamantyl- $\text{CH}_2$ , CH), 3.66 (1H, d,  $J=14.7$  Hz, H9), 3.75 (1H, dq,  $J=7.2$  Hz, 10.7 Hz,  $\text{OCH}_2\text{CH}_3$ ), 3.82 (1H, d,  $J=14.7$  Hz, H9), 3.95 (1H,

m,  $\text{OCH}_2\text{CH}_3$ ), 3.97 (1H, s, H4), 5.19 (1H, s, H2), 6.86 (2H, m, Ar-H), 7.23 (3H, m, Ar-H), 7.36-7.50 (6H, m, Ar-H), 7.60 (2H, d,  $J=7.5$  Hz, Ar-H), 7.97 (2H, m, Ar-H);  $\delta_{\text{C}}$  (Major tautomer) (101 MHz,  $\text{CDCl}_3$ ) 13.7 ( $\text{OCH}_2\text{CH}_3$ ), 29.4 (Adamantyl-C), 36.1 (Adamantyl-C), 41.7 (Adamantyl-C), 50.1 (C9), 53.4 (Adamantyl-C), 62.0 ( $\text{OCH}_2\text{CH}_3$ ), 69.3 (C4), 76.6 (C2), 79.2 (C5), 94.5 (C7), 127.6-139.1 (Ar-C), 165.3 (C=O), 166.5 (C=O), 174.9 (C=O), 187.6 (C6); LRMS (ESI<sup>-</sup>)  $m/z$ : 630.3 ([ $\text{M} - \text{H}$ ]<sup>-</sup> 97%); HRMS (ESI<sup>-</sup>)  $m/z$ : [ $\text{M} - \text{H}$ ]<sup>-</sup> calcd. for  $\text{C}_{39}\text{H}_{40}\text{N}_3\text{O}_5$ , 630.2963, found 630.2980.

**Ethyl (1S\*,3S\*,7aR\*)-6-(adamantan-1-ylcarbamoyl)-2-benzyl-1,3-bis(4-bromophenyl)-7-hydroxy-5-oxo-2,3-dihydro-1H-pyrrolo[1,2-c]imidazole-7a(5H)-carboxylate 24b**

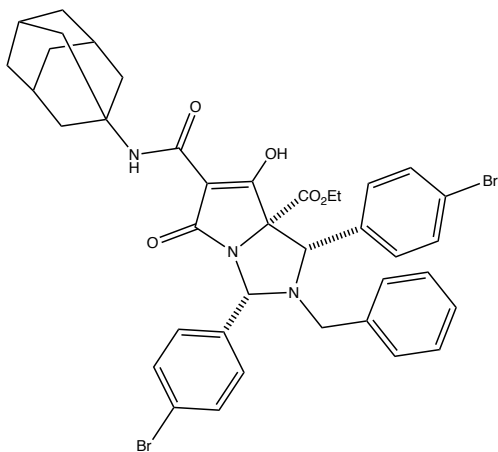

Yield (221 mg, 38%); Orange foamy solid; m.p. 129-133°C;  $R_f$  (30% EtOAc in Pet. Ether 40:60) 0.90;  $\nu_{\max}/\text{cm}^{-1}$  3309 (O-H), 2910 (C-H), 2852 (C-H), 1744 (C=O), 1693 (C=O), 1627 (C=C); AB:CD 60:40 by  $\delta_{\text{H-NMR}}$ ;  $\delta_{\text{H}}$  (Major tautomer) (400 MHz,  $\text{CDCl}_3$ ) 0.95 (3H, t,  $J=6.9$  Hz,  $\text{OCH}_2\text{CH}_3$ ), 1.67-1.69 (6H, br s, Adamantyl- $\text{CH}_2$ ), 2.01-2.03 (6H, br s, Adamantyl- $\text{CH}_2$ ), 2.11 (3H, br s, Adamantyl-CH), 3.65 (1H, d,  $J=14.6$  Hz, H9), 3.74-3.83 (2H, m,  $\text{OCH}_2\text{CH}_3$ , H9), 3.92 (1H, s, H4), 3.97 (1H,

m,  $\text{OCH}_2\text{CH}_3$ ), 5.15 (1H, s, H2), 6.83 (2H, m, Ar-H), 7.23 (2H, m, Ar-H), 7.45 (3H, m, Ar-H), 7.57 (2H, d,  $J=8.4$  Hz, Ar-H), 7.61 (2H, m, Ar-H), 7.79 (2H, m, Ar-H);  $\delta_{\text{C}}$  (Major tautomer) (101 MHz,  $\text{CDCl}_3$ ) 13.7 ( $\text{OCH}_2\text{CH}_3$ ), 29.4 (Adamantyl-C), 36.1 (Adamantyl-C), 41.6 (Adamantyl-C), 50.7 (C9), 53.8 (Adamantyl-C), 62.2 ( $\text{OCH}_2\text{CH}_3$ ), 68.9 (C4), 76.2 (C2), 93.3 (C7), 122.8-138.1 (Ar-C), 165.1 (C=O), 166.6 (C=O), 174.8 (C=O), 188.2 (C6); LRMS (ESI<sup>-</sup>)  $m/z$ : 786.0 ([ $\text{M}^{79+79} - \text{H}$ ]<sup>-</sup> 45%), 788.0 ([ $\text{M}^{79+81} - \text{H}$ ]<sup>-</sup> 100%), 790.0 ([ $\text{M}^{81+81} - \text{H}$ ]<sup>-</sup> 55%); HRMS (ESI<sup>-</sup>)  $m/z$ : [ $\text{M}^{79+79} - \text{H}$ ]<sup>-</sup> calcd. for

$C_{39}H_{38}N_3O_5Br_2$ , 786.1173, found 786.1187;  $[M^{79+81} - H]^-$  calcd. for  $C_{39}H_{38}N_3O_5Br_2$ , 788.1156, found 788.1167;  $[M^{81+81} - H]^-$  calcd. for  $C_{39}H_{38}N_3O_5Br_2$ , 790.1145, found 790.1151.

**Ethyl (1S\*,3S\*,7aR\*)-6-(adamantan-1-ylcarbamoyl)-2-benzyl-7-hydroxy-1,3-bis(4-nitrophenyl)-5-oxo-2,3-dihydro-1H-pyrrolo[1,2-c]imidazole-7a(5H)-carboxylate 24c**

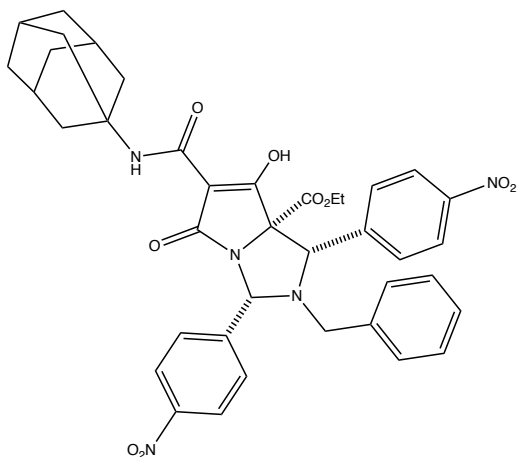

Yield (305 mg, 37%); Brown solid; m.p. 156-160°C;  $R_f$  (30% EtOAc in Pet. Ether 40:60) 0.58;  $\nu_{max}/cm^{-1}$  3307 (O-H), 2911 (C-H), 2852 (C-H), 1742 (C=O), 1693 (C=O), 1629 (C=C); AB:CD 58:42 by  $\delta_H$ -NMR;  $\delta_H$  (Major tautomer) (400 MHz,  $CDCl_3$ ) 0.88 (3H, m,  $OCH_2CH_3$ ), 1.66-1.70 (6H, br m, Adamantyl- $CH_2$ ), 2.04-2.06 (6H, br m, Adamantyl- $CH_2$ ), 2.14 (3H, br s, Adamantyl-CH), 3.71-3.81 (3H, m,  $OCH_2CH_3$ , H9), 3.95 (1H, m,  $OCH_2CH_3$ ), 4.14 (1H, s, H4), 5.39 (1H, s, H2), 6.86 (2H, m, Ar-H), 7.19 (3H, m, Ar-H), 7.53 (1H, br s, NH/OH), 7.80 (2H, d,  $J=8.7$  Hz, Ar-H), 7.98 (2H, m, Ar-H), 8.22 (2H, d,  $J=8.7$  Hz, Ar-H), 8.33 (2H, d,  $J=8.7$  Hz, Ar-H);  $\delta_C$  (Major tautomer) (101 MHz,  $CDCl_3$ ) 13.8 ( $OCH_2CH_3$ ), 29.4 (Adamantyl-C), 36.0 (Adamantyl-C), 41.7 (Adamantyl-C), 53.4 (C9), 54.4 (Adamantyl-C), 62.4 ( $OCH_2CH_3$ ), 69.7 (C4), 76.6 (C2), 90.9 (C7), 123.5-148.3 (Ar-C), 164.8 (C=O), 166.8 (C=O), 174.6 (C=O), 189.2 (C6); LRMS (ESI<sup>-</sup>)  $m/z$ : 720.0 ( $[M - H]^-$  98%); HRMS (ESI<sup>-</sup>)  $m/z$ :  $[M - H]^-$  calcd. for  $C_{39}H_{38}N_5O_9$ , 720.2675, found 720.2679.

**Ethyl (1S\*,3S\*,7aR\*)-2-(4-(tert-butyl)phenyl)-5,7-dioxo-1,3-diphenyltetrahydro-1H-pyrrolo[1,2-c]imidazole-7a(5H)-carboxylate 27**

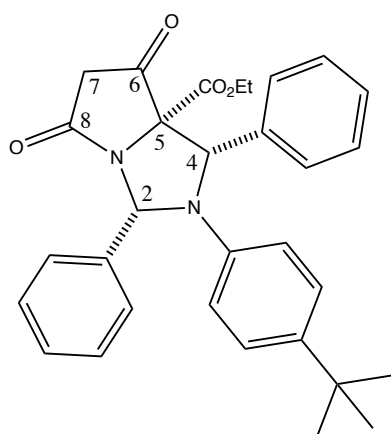

Yield not determined; 73:27 mixture of compounds **28:27**;  $\delta_H$  (400 MHz,  $CDCl_3$ ) 0.54 (3H, t,  $J=7.1$  Hz,  $OCH_2CH_3$ ), 1.22 (9H, s,  $(CH_3)_3$ ), 3.13 (1H, d,  $J=20.5$  Hz, H7), 3.43 (2H, m,  $OCH_2CH_3$ ), 3.60 (1H, d,  $J=20.5$  Hz, H7), 5.17 (1H, s, H4), 6.51 (2H, d,  $J=8.9$  Hz, Ar-H), 6.65 (1H, s, H2), 7.14-7.17 (2H, m, Ar-H), 7.31-7.48 (6H, m, Ar-H), 7.70-7.72 (2H, m, Ar-H), 7.82 (2H, m, Ar-H);  $\delta_C$  (101 MHz,  $CDCl_3$ ) 13.1 ( $OCH_2CH_3$ ), 31.5 ( $(CH_3)_3$ ), 34.0 ( $C(CH_3)_3$ ), 43.3 (C7), 62.3 ( $OCH_2CH_3$ ), 68.2 (C4), 76.1 (C5), 77.6 (C2), 114.8 (Ar-C), 126.0 (Ar-C), 127.3

(Ar-C), 127.7 (Ar-C), 128.2 (Ar-C), 128.5 (Ar-C), 128.7 (Ar-C), 128.8 (Ar-C), 136.2 (Ar-C), 140.3 (Ar-C), 142.8 (Ar-C), 144.3 (Ar-C), 164.9 (C=O), 168.4 (C=O), 198.1 (C6).

**Diethyl (1*S*\*,3*S*\*,7*aR*\*)-2-(4-(*tert*-butyl)phenyl)-7-hydroxy-5-oxo-1,3-diphenyl-2,3-dihydro-1*H*-pyrrolo[1,2-*c*]imidazole-6,7*a*(5*H*)-dicarboxylate **28****

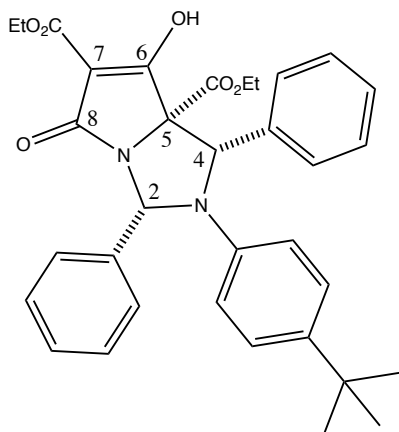

Yield not determined; 73:27 mixture of compounds **28:27**;  $\delta_H$  (400 MHz, CDCl<sub>3</sub>) 0.51 (3H, t,  $J=7.1$  Hz, OCH<sub>2</sub>CH<sub>3</sub>), 1.21 (9H, s, (CH<sub>3</sub>)<sub>3</sub>), 1.42 (3H, t,  $J=7.1$  Hz, OCH<sub>2</sub>CH<sub>3</sub>), 3.43 (2H, m, OCH<sub>2</sub>CH<sub>3</sub>), 4.44 (2H, q,  $J=7.1$  Hz, OCH<sub>2</sub>CH<sub>3</sub>), 5.05 (1H, s, H4), 6.40 (1H, s, H2), 6.47 (2H, d,  $J=8.9$  Hz, Ar-H), 7.13 (2H, d,  $J=8.9$  Hz, Ar-H), 7.31-7.48 (6H, m, Ar-H), 7.69 (2H, m, Ar-H), 7.78 (2H, m, Ar-H);  $\delta_C$  (101 MHz, CDCl<sub>3</sub>) 13.0 (OCH<sub>2</sub>CH<sub>3</sub>), 14.3 (OCH<sub>2</sub>CH<sub>3</sub>), 31.5 ((CH<sub>3</sub>)<sub>3</sub>), 34.0 (C(CH<sub>3</sub>)<sub>3</sub>), 62.0 (OCH<sub>2</sub>CH<sub>3</sub>), 62.2 (OCH<sub>2</sub>CH<sub>3</sub>), 69.3 (C4), 76.1 (C5), 77.7 (C2),

114.7 (Ar-C), 125.9 (Ar-C), 127.3 (Ar-C), 127.7 (Ar-C), 128.2 (Ar-C), 128.5 (Ar-C), 128.7 (Ar-C), 128.8 (Ar-C), 136.3 (Ar-C), 141.2 (Ar-C), 142.5 (Ar-C), 144.9 (Ar-C), 164.2 (C=O), 167.6 (C=O), 186.4 (C6); LRMS (ESI<sup>-</sup>)  $m/z$ : 567.2 ([M - H]<sup>-</sup> 100%).

## References

- 1) J. Cosier and A.M. Glazer, *J. Appl. Crystallogr.*, 1986, **19**, 105-107.
- 2) L. Palatinus and G. Chapuis, *J. Appl. Crystallogr.*, 2007, **40**, 786-790.
- 3) P. W. Betteridge, J.R. Carruthers, R.I. Cooper, K. Prout and D.J. Watkins, *J. Appl. Crystallogr.*, 2003, **36**, 1487-1487.
- 4) M.D. Andrews, A.G. Brewster, K.M. Crapnell, A.J. Ibbett, T. Jones, M.G. Moloney, K. Prout and D. Watkin, *J. Chem. Soc. Perkin Trans. 1*, 1998, 223-235.
- 5) H. Bagum, K.E. Christensen, M. Genov, A. Pretsch, D. Pretsch and M.G. Moloney, *J. Org. Chem.*, 2019, **84**, 10257-10279.
- 6) Y. Nagao, K. Kim, Y. Komaki, S. Sano, M. Kihara and M. Shiro, *Heterocycles*, 1994, **38**, 587-593.
- 7) W-J. Liu, X-H. Chen and L-Z. Gong, *Org. Lett.*, 2008, **10**, 5357-5360.
- 8) L. Josa-Culleré, C. Towers, A.L. Thompson and M.G. Moloney, *Eur. J. Org. Chem.*, 2017, 7055-7059.
- 9) T.D. Panduwawala, S. Iqbal, A.L. Thompson, M. Genov, A. Pretsch, D. Pretsch, S. Liu, R.H. Ebright, A. Howells, A. Maxwell and M.G. Moloney, *Org. Biomol. Chem.*, 2019, **17**, 5615-5632.
- 10) Y-C. Jeong, M. Anwar, Z. Bikadi, E. Hazai and M. G. Moloney, *Chem. Sci.*, 2013, **4**, 1008-1015.

Instrument AVF400  
 Chemist TDP  
 Group MGM  
 TP 0054  
 h1acq.crl CD2Cl2 {C:\NMR} mgmgrp 47

NMR@CHEM.OX

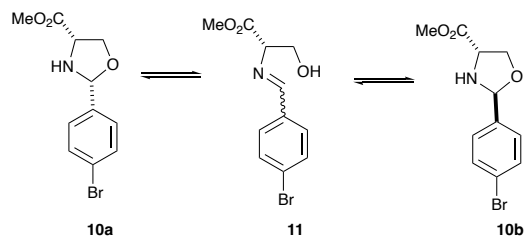

10, 11

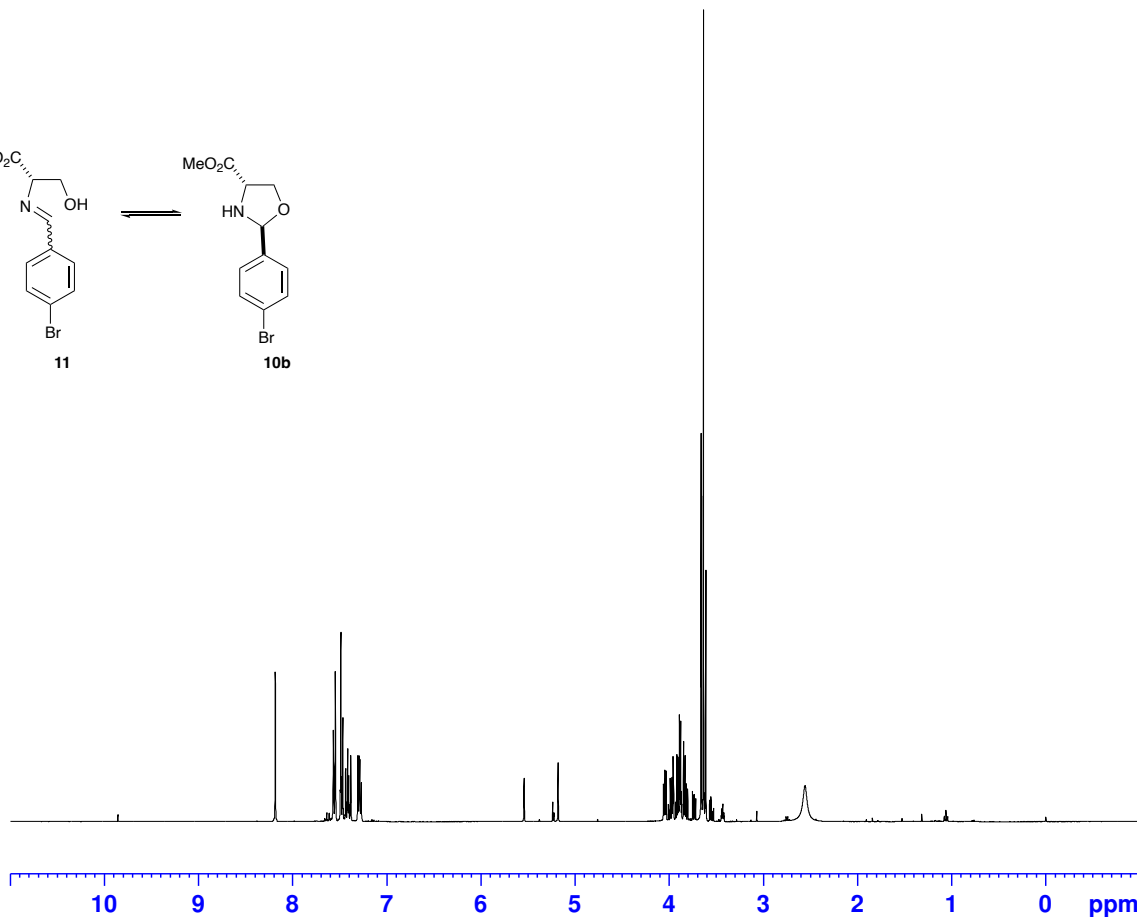

Current Data Parameters  
 NAME May16-2014-47  
 EXPNO 1  
 PROCNO 1

F2 - Acquisition Parameters  
 Date\_ 20140517  
 Time 7.35  
 INSTRUM avf400  
 PROBHD 5 mm PABBO BB/  
 PULPROG zg60  
 TD 65536  
 SOLVENT CD2Cl2  
 NS 16  
 DS 2  
 SWH 8012.820 Hz  
 FIDRES 0.122266 Hz  
 AQ 4.0894465 sec  
 RG 25.89  
 DW 62.400 usec  
 DE 6.50 usec  
 TE 297.3 K  
 D1 1.00000000 sec  
 TD0 1

===== CHANNEL f1 =====  
 SFO1 400.2524015 MHz  
 NUC1 1H  
 P1 12.65 usec  
 PLW1 16.70000076 W

F2 - Processing parameters  
 SI 32768  
 SF 400.2500548 MHz  
 WDW EM  
 SSB 0  
 LB 0.30 Hz  
 GB 0  
 PC 1.00





Instrument AVF400  
Chemist TDP  
Group MGM  
TP 0055  
h1acq.crl CDCI3 {C:\NMR} mgmgrp 11

NMROCHEM.OX

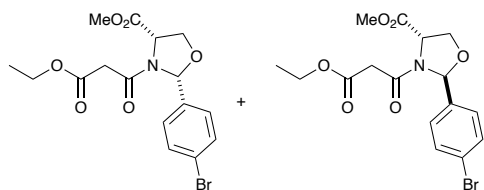

12

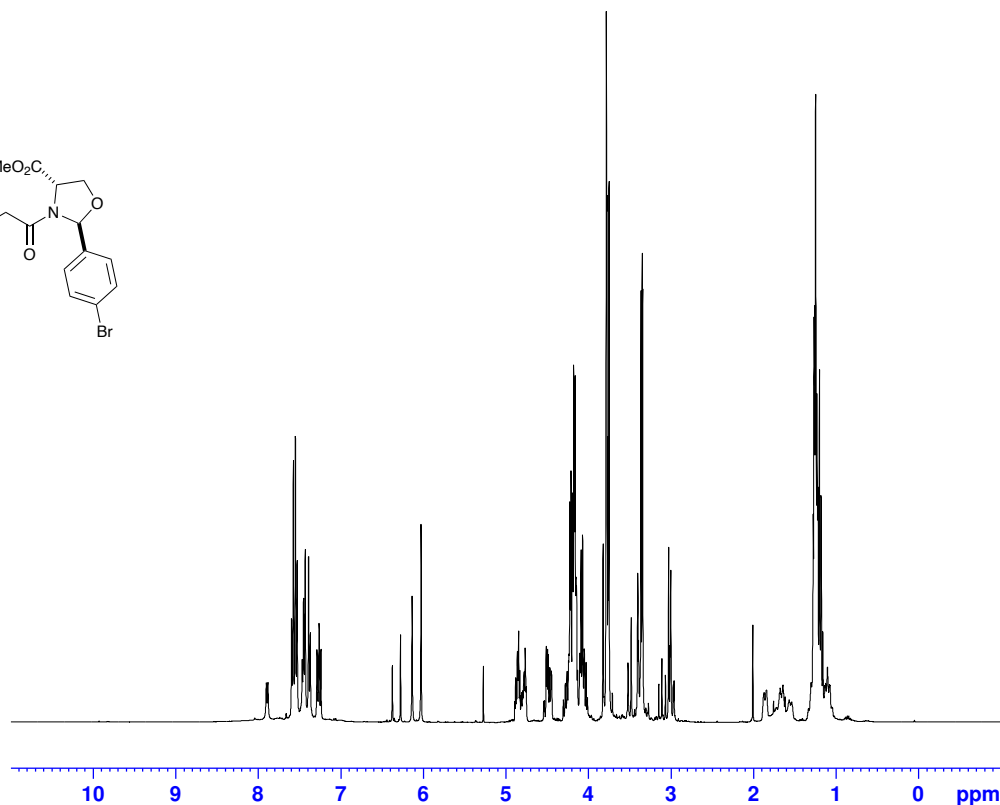

Current Data Parameters  
NAME May14-2014-11  
EXPNO 1  
PROCNO 1

F2 - Acquisition Parameters  
Date\_ 20140515  
Time 8.57  
INSTRUM avf400  
PROBHD 5 mm PABBO BB/  
PULPROG zg60  
TD 65536  
SOLVENT CDCI3  
NS 16  
DS 2  
SWH 8012.820 Hz  
FIDRES 0.122266 Hz  
AQ 4.0894465 sec  
RG 11.39  
DW 62.400 usec  
DE 6.50 usec  
TE 296.5 K  
D1 1.00000000 sec  
TD0 1

===== CHANNEL f1 =====  
SFO1 400.2524015 MHz  
NUC1 1H  
P1 12.65 usec  
PLW1 16.70000076 W

F2 - Processing parameters  
SI 32768  
SF 400.2500000 MHz  
WDW EM  
SSB 0  
LB 0.30 Hz  
GB 0  
PC 1.00

Instrument AVF400

Chemist TDP

Group MGM

TP-0055

c13acq.crf CDC13 (C:NMR) mgmgrp 11

MROCHEM.OX

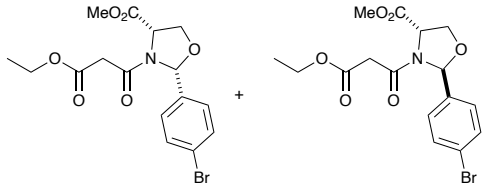

12

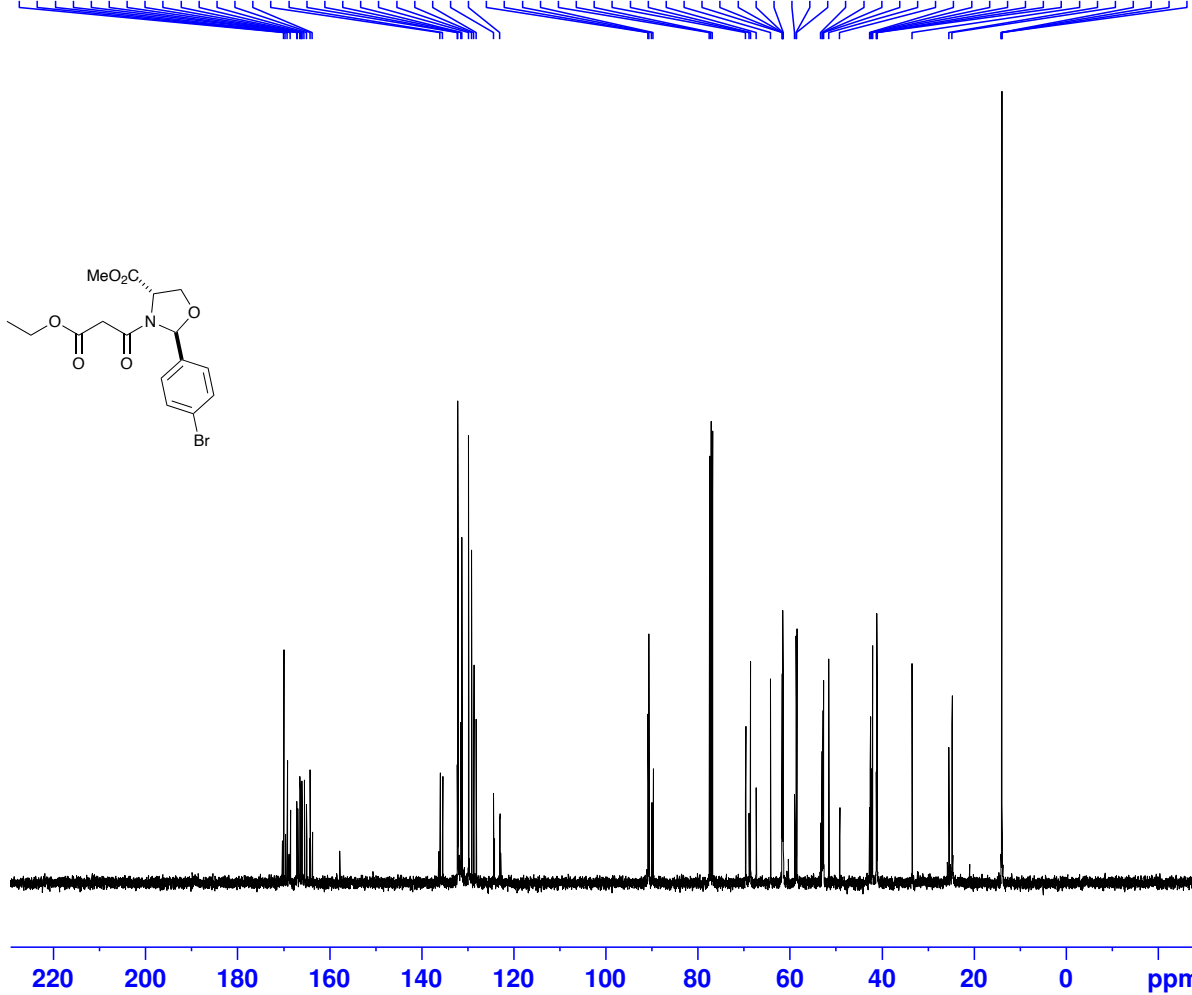

Current Data Parameters  
NAME May14-2014-11  
EXPNO 2  
PROCNO 1

F2 - Acquisition Parameters  
Date\_ 20140515  
Time 9.04  
INSTRUM avf400  
PROBHD 5 mm PABBO BB/  
PULPROG zgpg30  
TD 32768  
SOLVENT CDCl3  
NS 256  
DS 4  
SWH 26041.666 Hz  
FIDRES 0.794729 Hz  
AQ 0.6291456 sec  
RG 205.43  
DW 19.200 usec  
DE 6.50 usec  
TE 297.5 K  
D1 1.00000000 sec  
D11 0.03000000 sec  
TDO 1

===== CHANNEL f1 =====  
SFO1 100.6530073 MHz  
NUC1 13C  
P1 9.00 usec  
PLW1 58.70000076 W

===== CHANNEL f2 =====  
SFO2 400.2516010 MHz  
NUC2 1H  
CPDPRG[2] waltz16  
PCPD2 90.00 usec  
PLW2 16.70000076 W  
PLW12 0.32991999 W  
PLW13 0.26723999 W

F2 - Processing parameters  
SI 32768  
SF 100.6429430 MHz  
WDW EM  
SSB 0  
LB 1.00 Hz  
GB 0  
PC 1.40

Instrument AVF400  
Chemist TDP  
Group MGM  
TP 0132  
h1acq.crl MeOD {C:\NMR} mgmgrp 54

NMR@CHEM.OX

Current Data Parameters  
NAME Oct11-2014-54  
EXPNO 1  
PROCNO 1

F2 - Acquisition Parameters  
Date\_ 20141011  
Time 20.15  
INSTRUM avf400  
PROBHD 5 mm PABBO BB/  
PULPROG zg60  
TD 65536  
SOLVENT MeOD  
NS 16  
DS 2  
SWH 8012.820 Hz  
FIDRES 0.122266 Hz  
AQ 4.0894465 sec  
RG 14.3  
DW 62.400 usec  
DE 6.50 usec  
TE 295.2 K  
D1 1.00000000 sec  
TD0 1

==== CHANNEL f1 =====  
SFO1 400.2524015 MHz  
NUC1 1H  
P1 12.65 usec  
PLW1 16.70000076 W

F2 - Processing parameters  
SI 32768  
SF 400.2500557 MHz  
WDW EM  
SSB 0  
LB 0.30 Hz  
GB 0  
PC 1.00

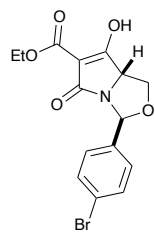

13

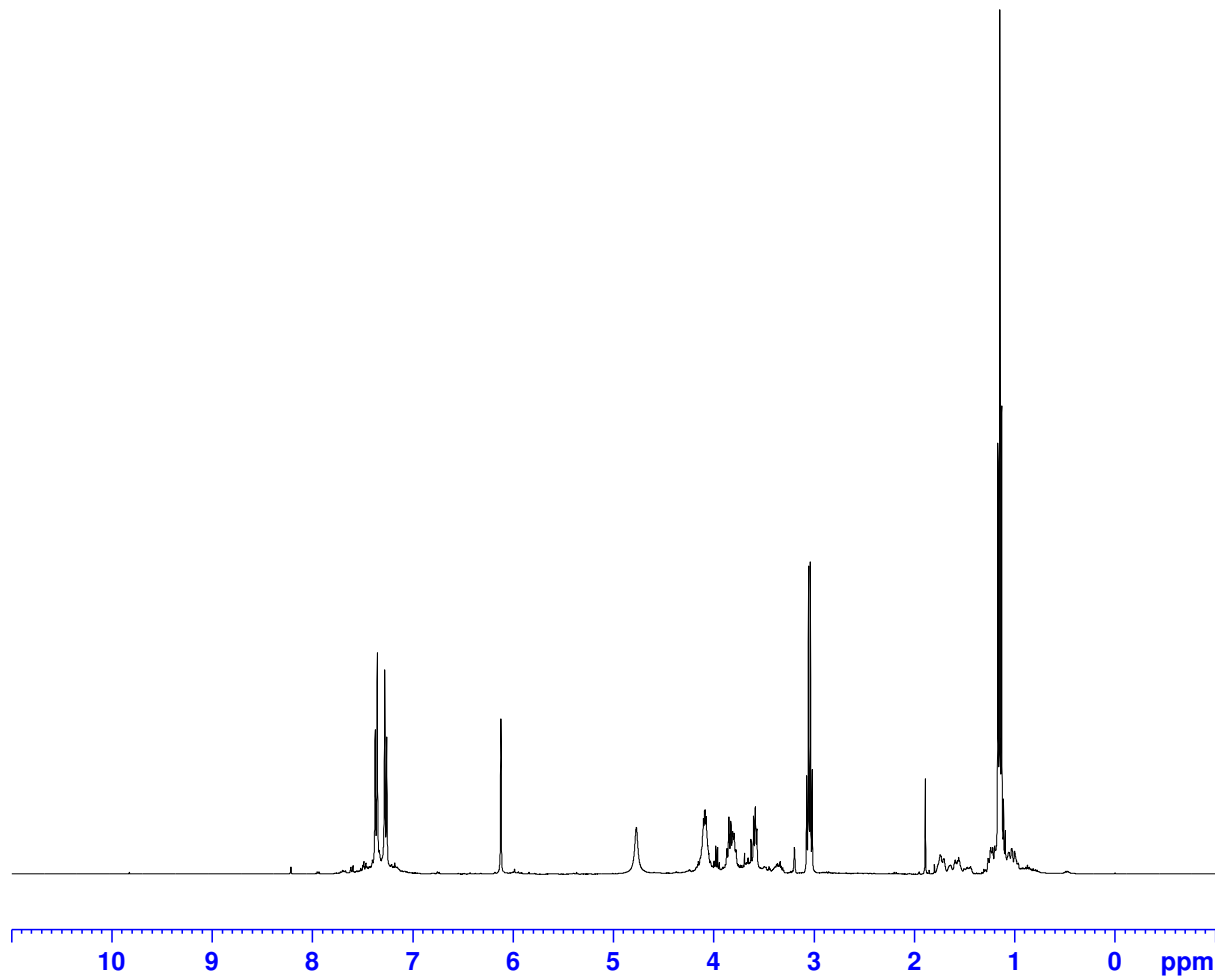

Instrument AVF400  
 Chemist TDP  
 Group MGM  
 TP 0132

c13acq.crl MeOD (C:\NMR) mgmgrp 54

INROCHEM.OX

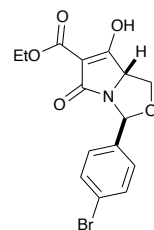

13

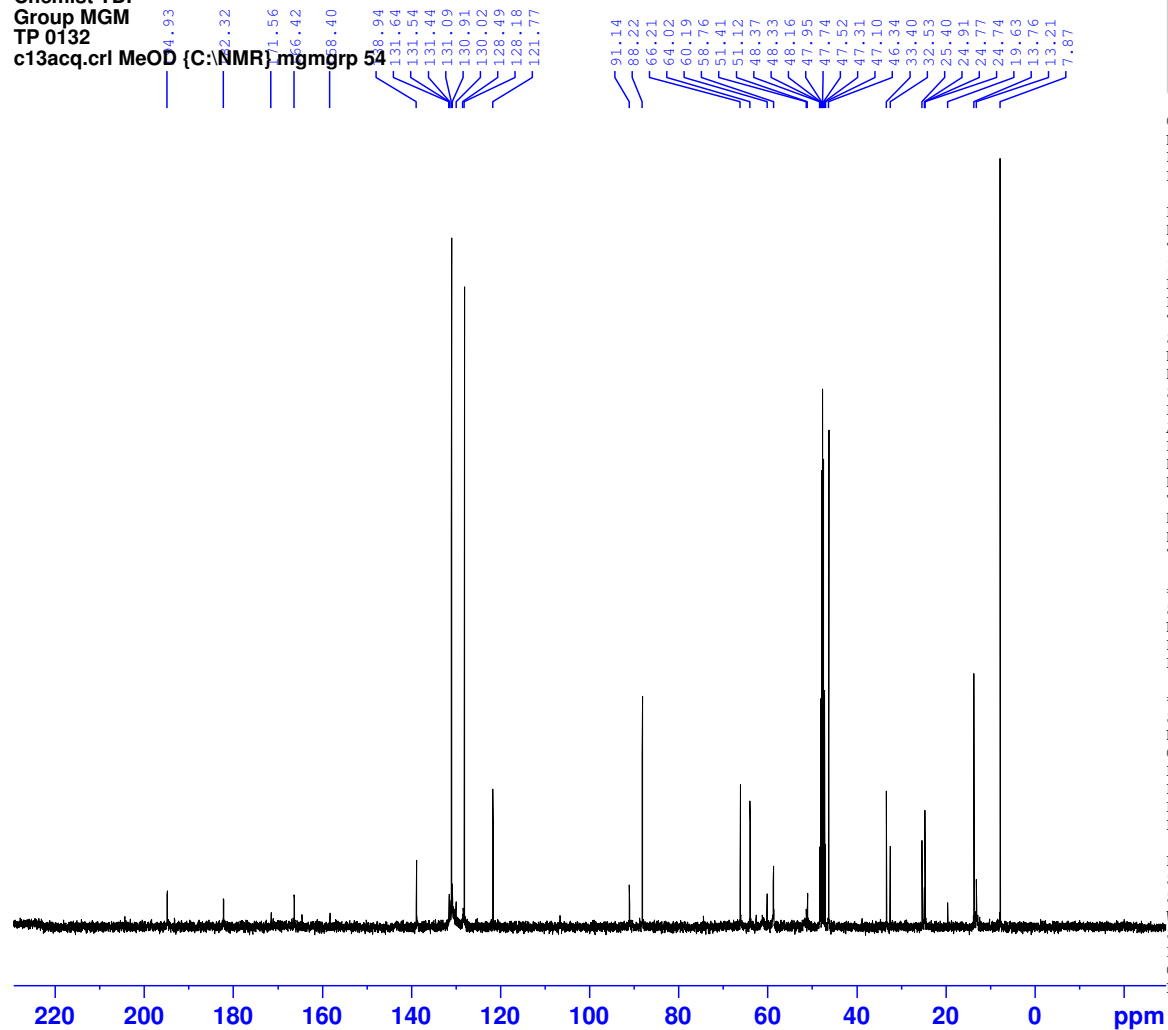

Current Data Parameters  
 NAME Oct11-2014-54  
 EXPNO 2  
 PROCNO 1

F2 - Acquisition Parameters  
 Date\_ 20141011  
 Time 20.22  
 INSTRUM avf400  
 PROBHD 5 mm PABBO BB/  
 PULPROG zgpg30  
 TD 32768  
 SOLVENT MeOD  
 NS 256  
 DS 4  
 SWH 26041.666 Hz  
 FIDRES 0.794729 Hz  
 AQ 0.6291456 sec  
 RG 205.43  
 DW 19.200 usec  
 DE 6.50 usec  
 TE 296.4 K  
 D1 1.00000000 sec  
 D11 0.03000000 sec  
 TD0 1

===== CHANNEL f1 =====  
 SFO1 100.6530073 MHz  
 NUC1 13C  
 P1 9.00 usec  
 PLW1 58.70000076 W

===== CHANNEL f2 =====  
 SFO2 400.2516010 MHz  
 NUC2 1H  
 CPDPRG[2] waltz16  
 PCPD2 90.00 usec  
 PLW2 16.70000076 W  
 PLW12 0.32991999 W  
 PLW13 0.26723999 W

F2 - Processing parameters  
 SI 32768  
 SF 100.6429430 MHz  
 WDW EM  
 SSB 0  
 LB 1.00 Hz  
 GB 0  
 PC 1.40

Jan21-2019-60-LS297(C).1.fid  
Instrument AVF400  
Chemist Liban Saney  
Group MGM  
Project Account Code DM7300  
h1acq.crl D2O {C:\NMR} mgmgrp 60

<sup>1</sup>H NMR (400 MHz D<sub>2</sub>O)

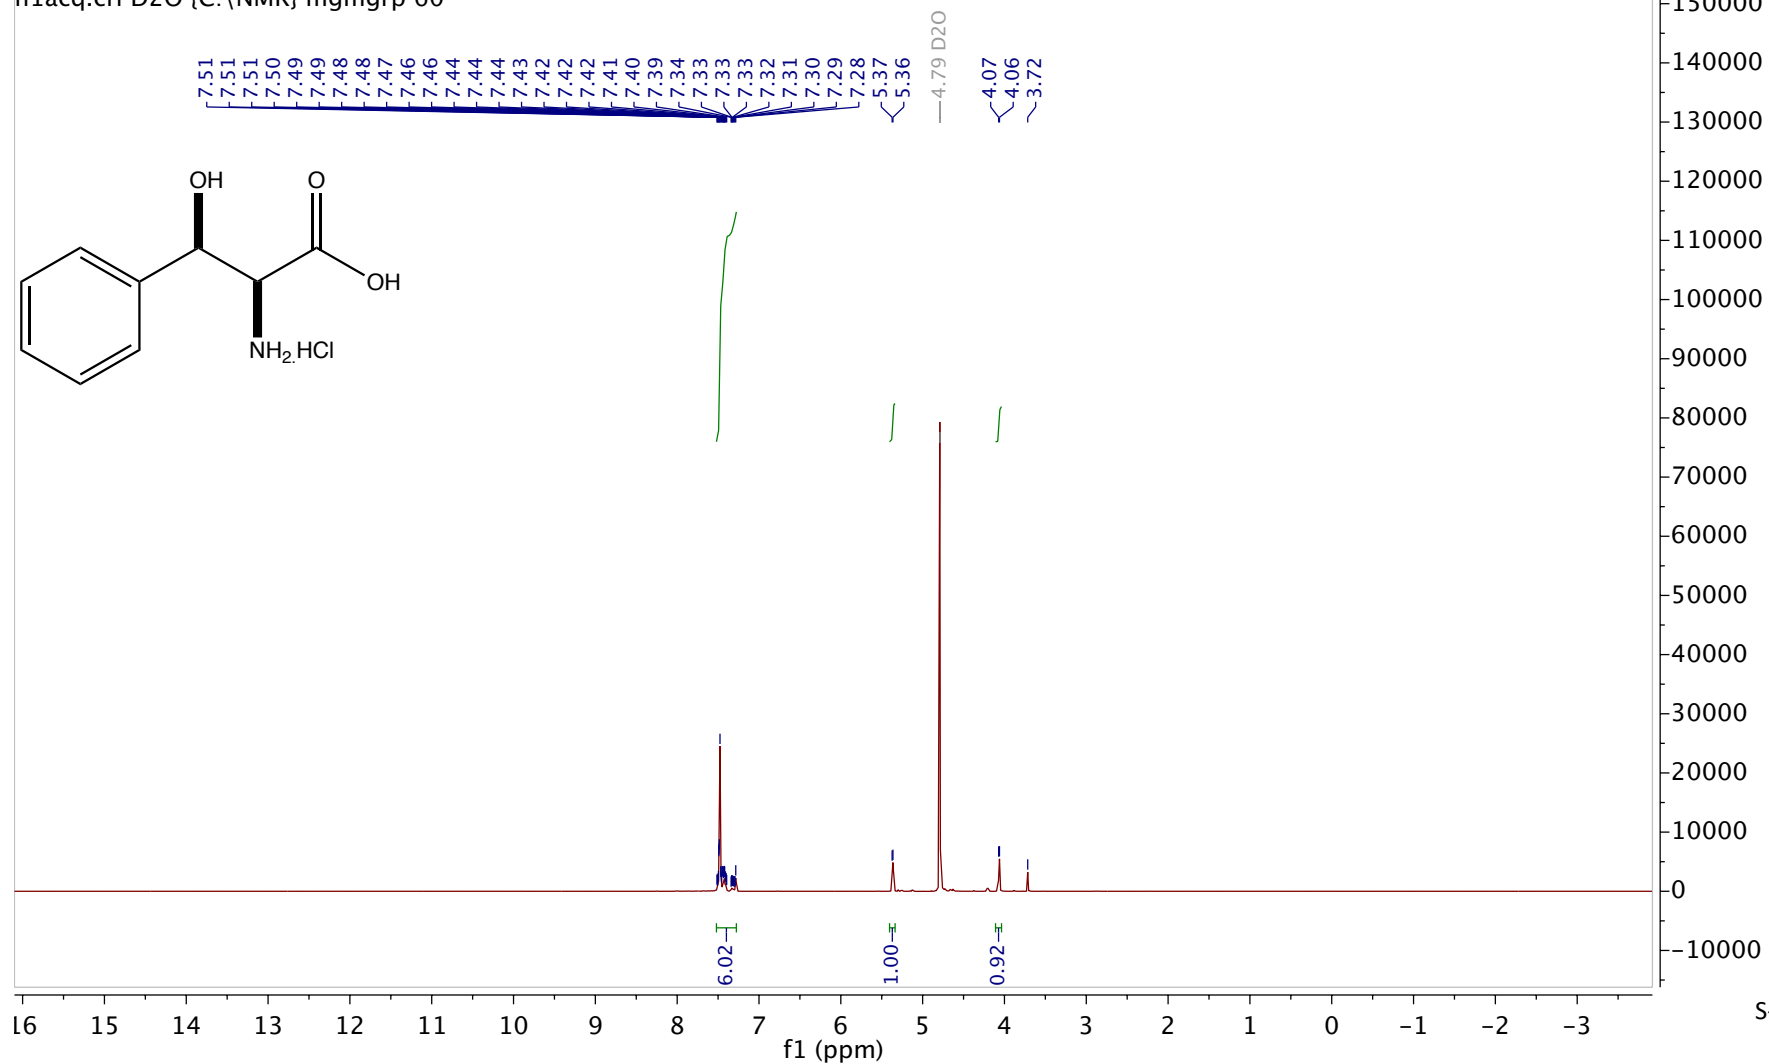

Jan21-2019-60-LS297(C).2.fid  
Instrument AVF400  
Chemist Liban Saney  
Group MGM  
Project Account Code DM7300  
c13acq\_512.crl D2O {C:\NMR} mgmgrp 60

<sup>13</sup>C NMR (101 MHz D<sub>2</sub>O)

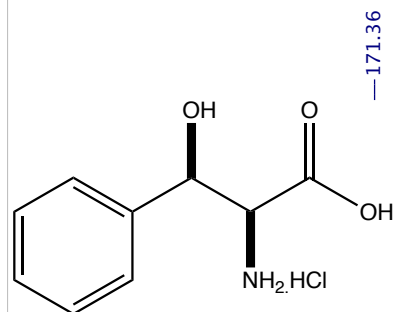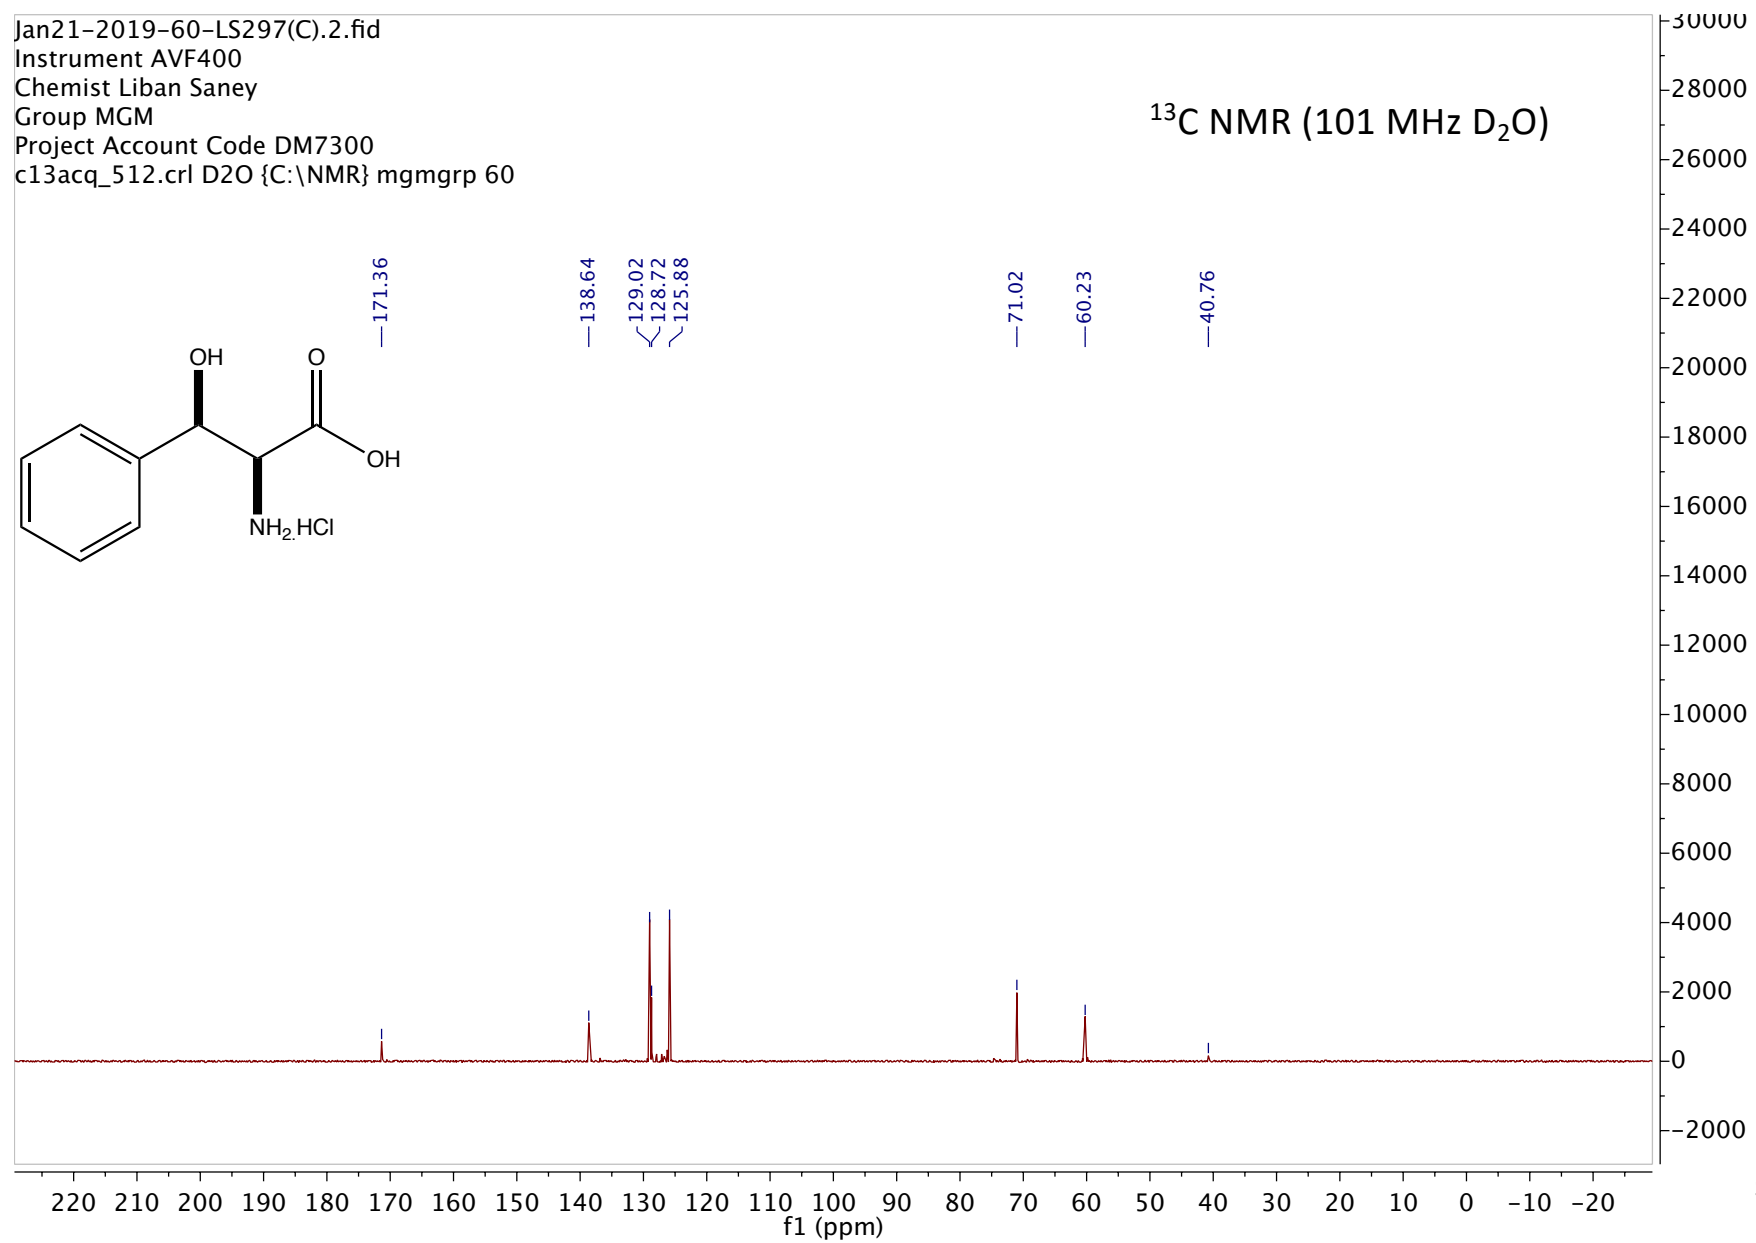

Nov21-2018-60-LS237(C).1.fid  
Instrument AVF400  
Chemist Liban Saney  
Group MGM  
Project Account Code DM7300  
h1acq.crl D2O {C:\NMR} mgmgrp 60

<sup>1</sup>H NMR (400 MHz D<sub>2</sub>O)

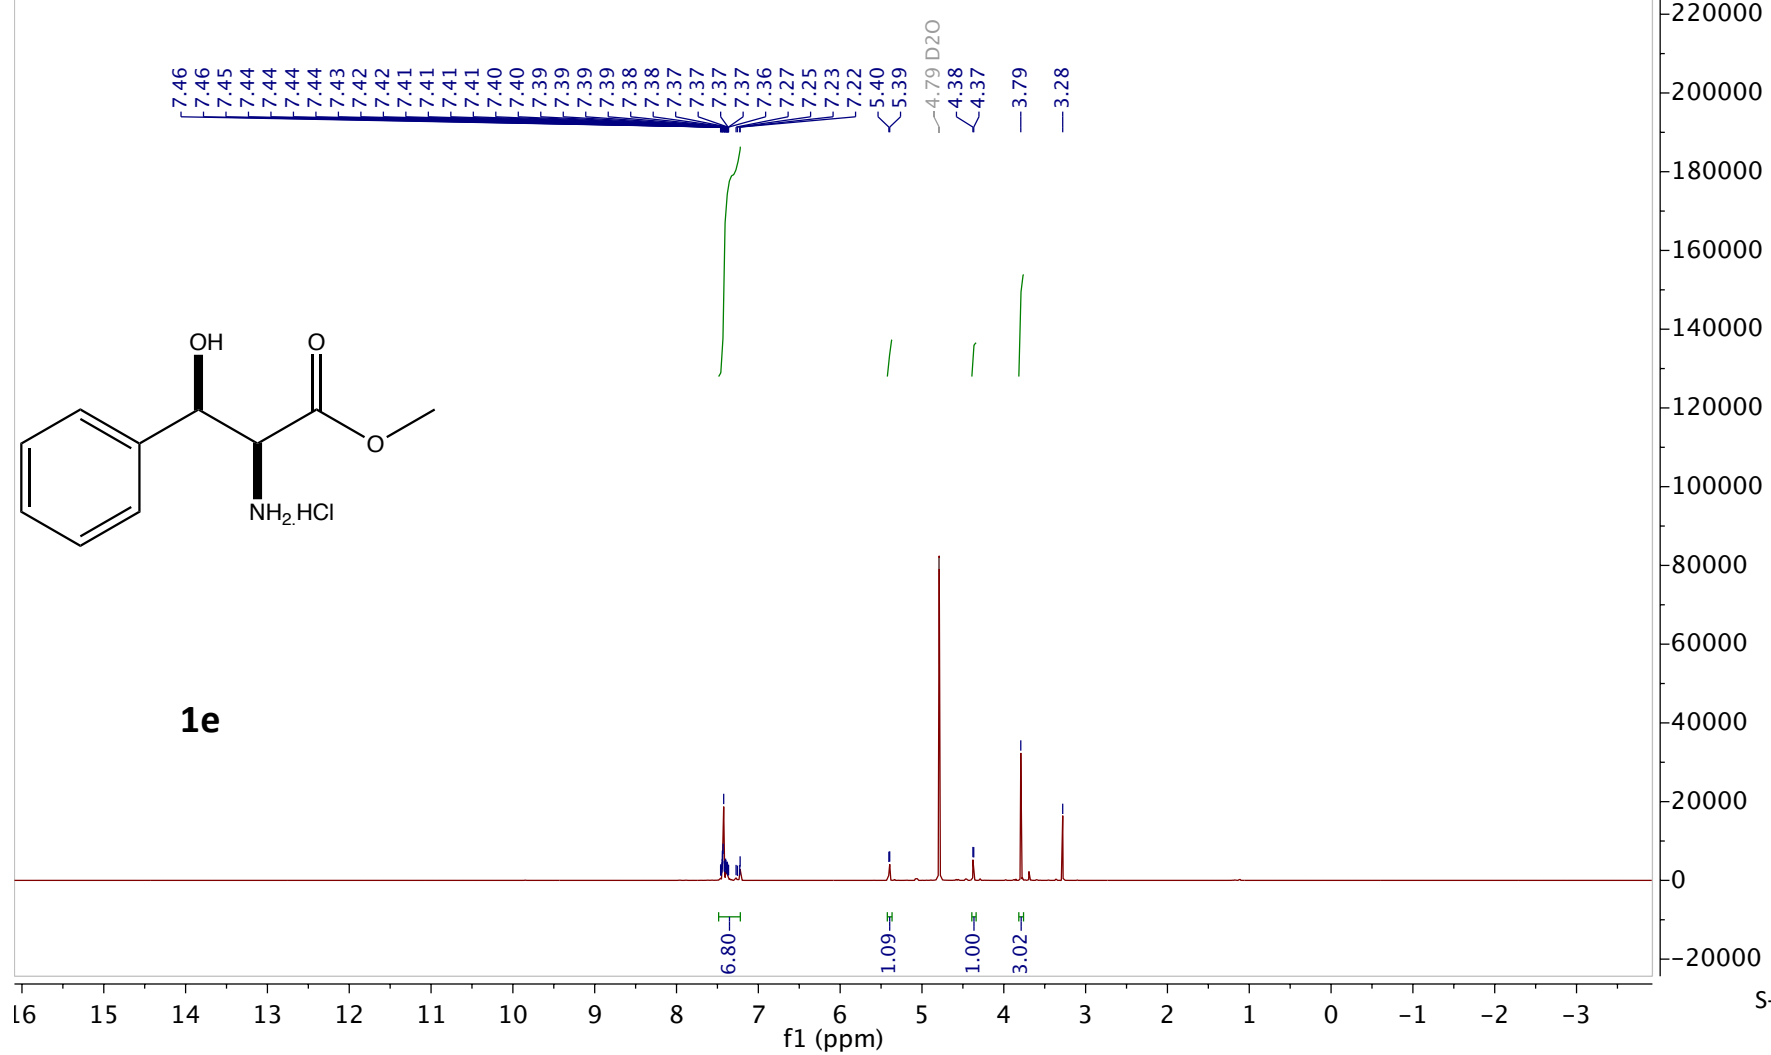

Nov21-2018-60-LS237(C).4.fid  
Instrument AVF400  
Chemist Liban Saney  
Group MGM  
Project Account Code DM7300  
c13acq\_512.crl D2O {C:\NMR} mgmgrp 60

<sup>13</sup>C NMR (101 MHz D<sub>2</sub>O)

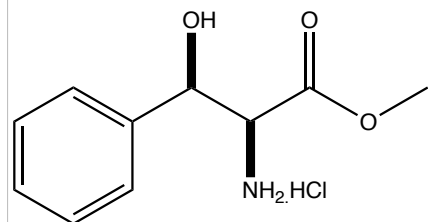

**1e**

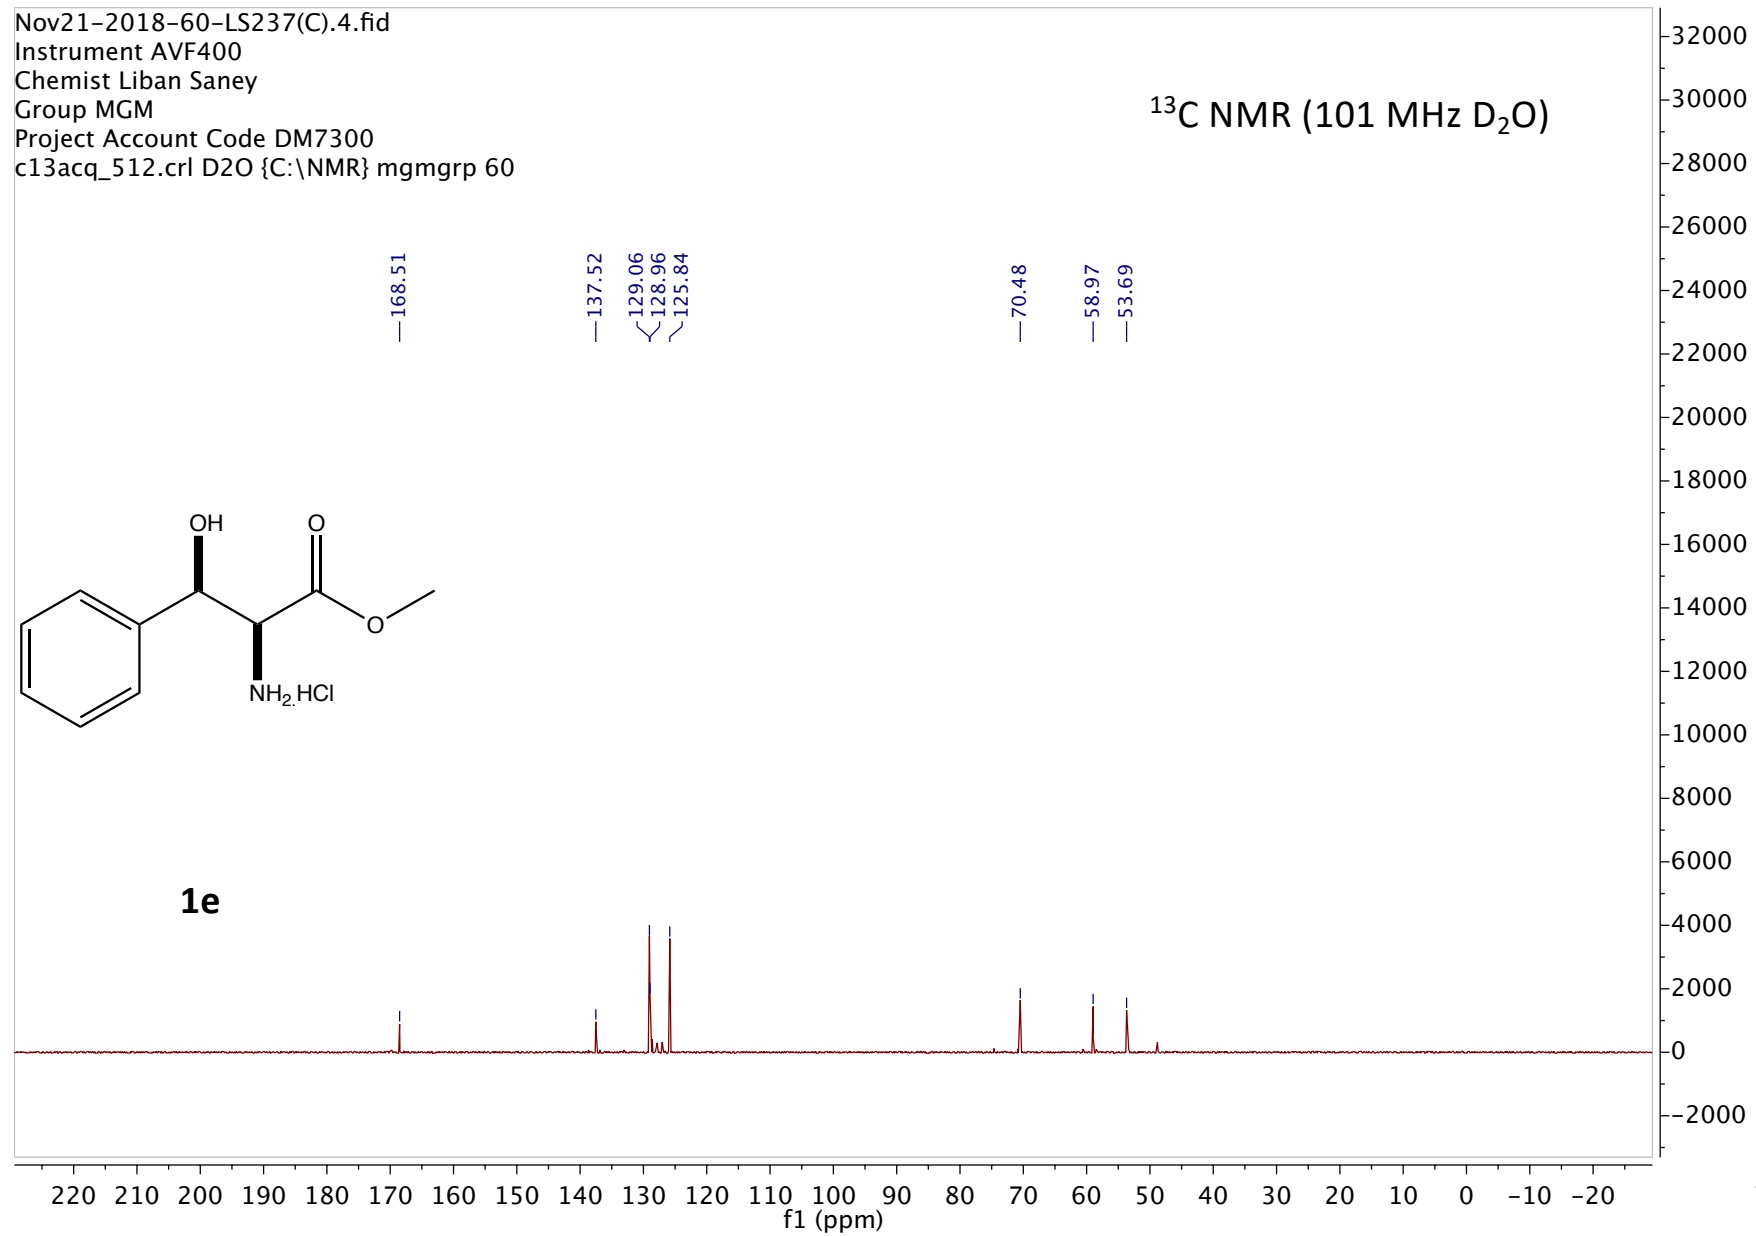



Apr06-2019-60-LS370(P) C3-D2.1.fid  
Instrument AVF400  
Chemist Liban Saney  
Group MGM  
Project Account Code DM7300  
h1acq.crl CDCl3 {C:\NMR} mgmgrp 60

<sup>1</sup>H NMR (400 MHz CDCl<sub>3</sub>)

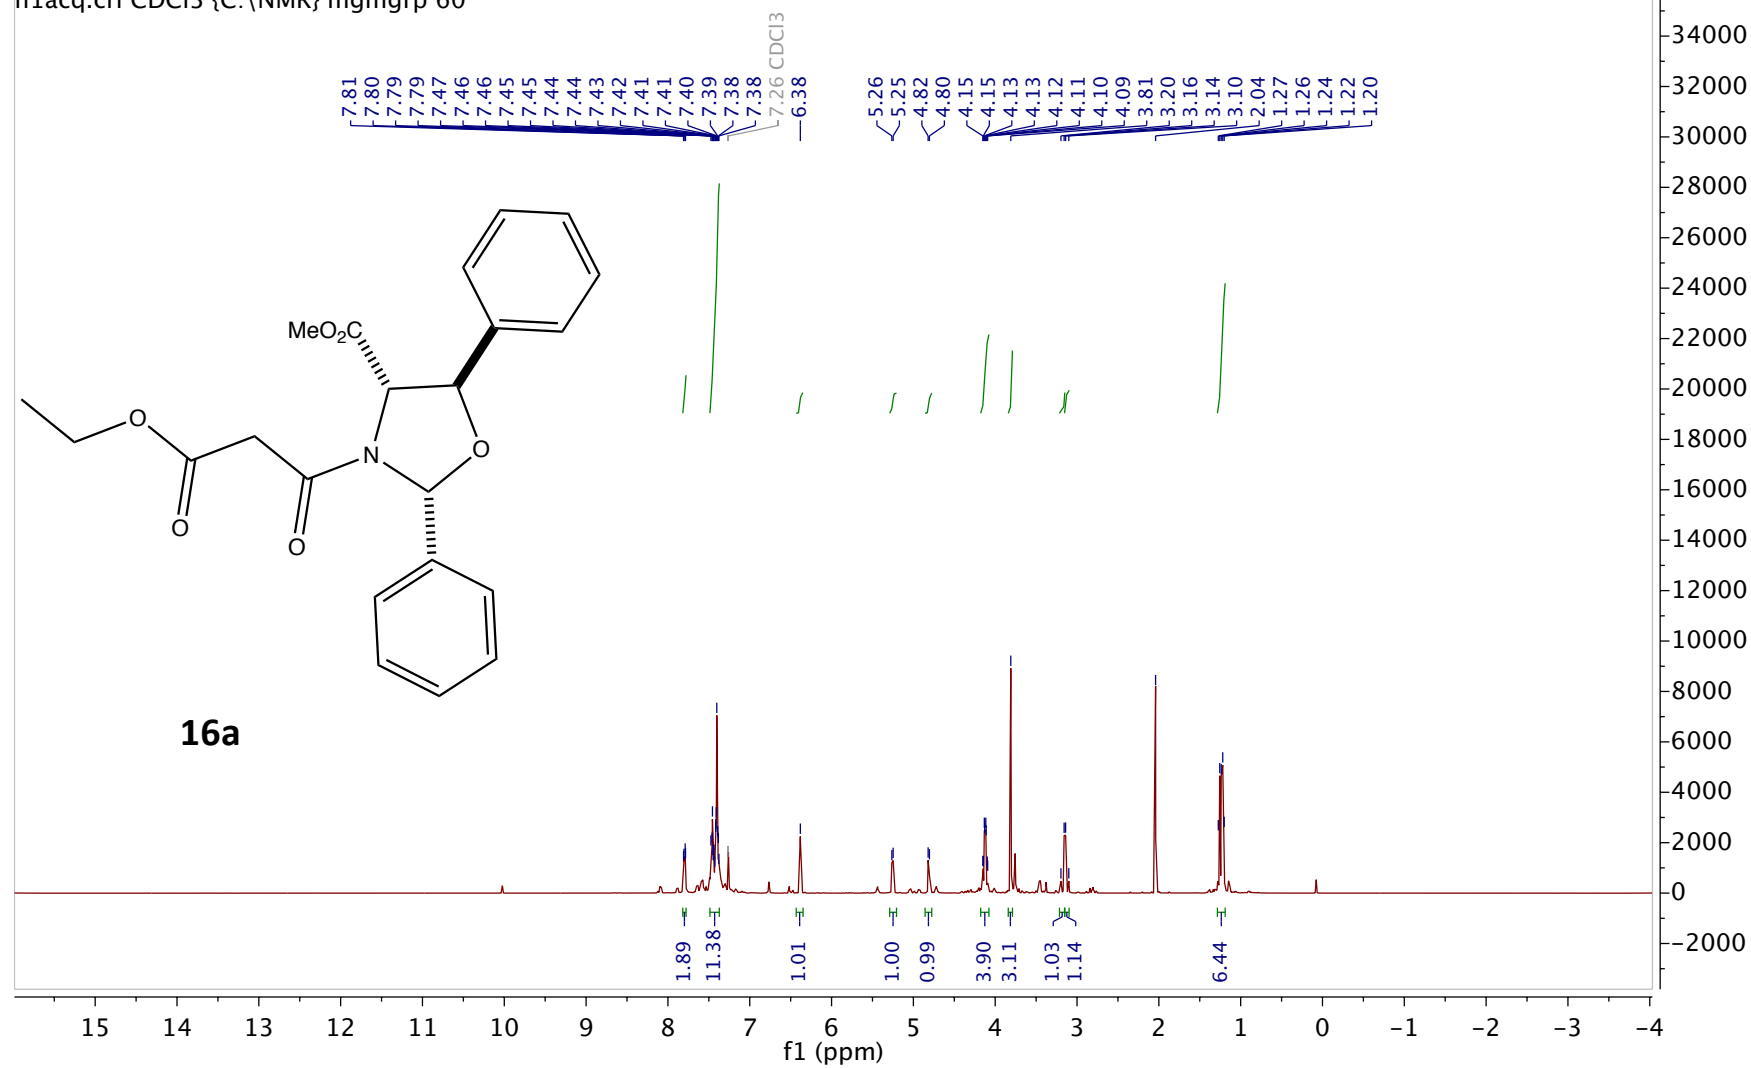

Apr06-2019-60-LS370(P) C3-D2.4.fid  
Instrument AVF400  
Chemist Liban Saney  
Group MGM  
Project Account Code DM7300  
c13acq\_512.crl CDCl3 {C:\NMR} mgmgrp 60

<sup>13</sup>C NMR (101 MHz CDCl<sub>3</sub>)

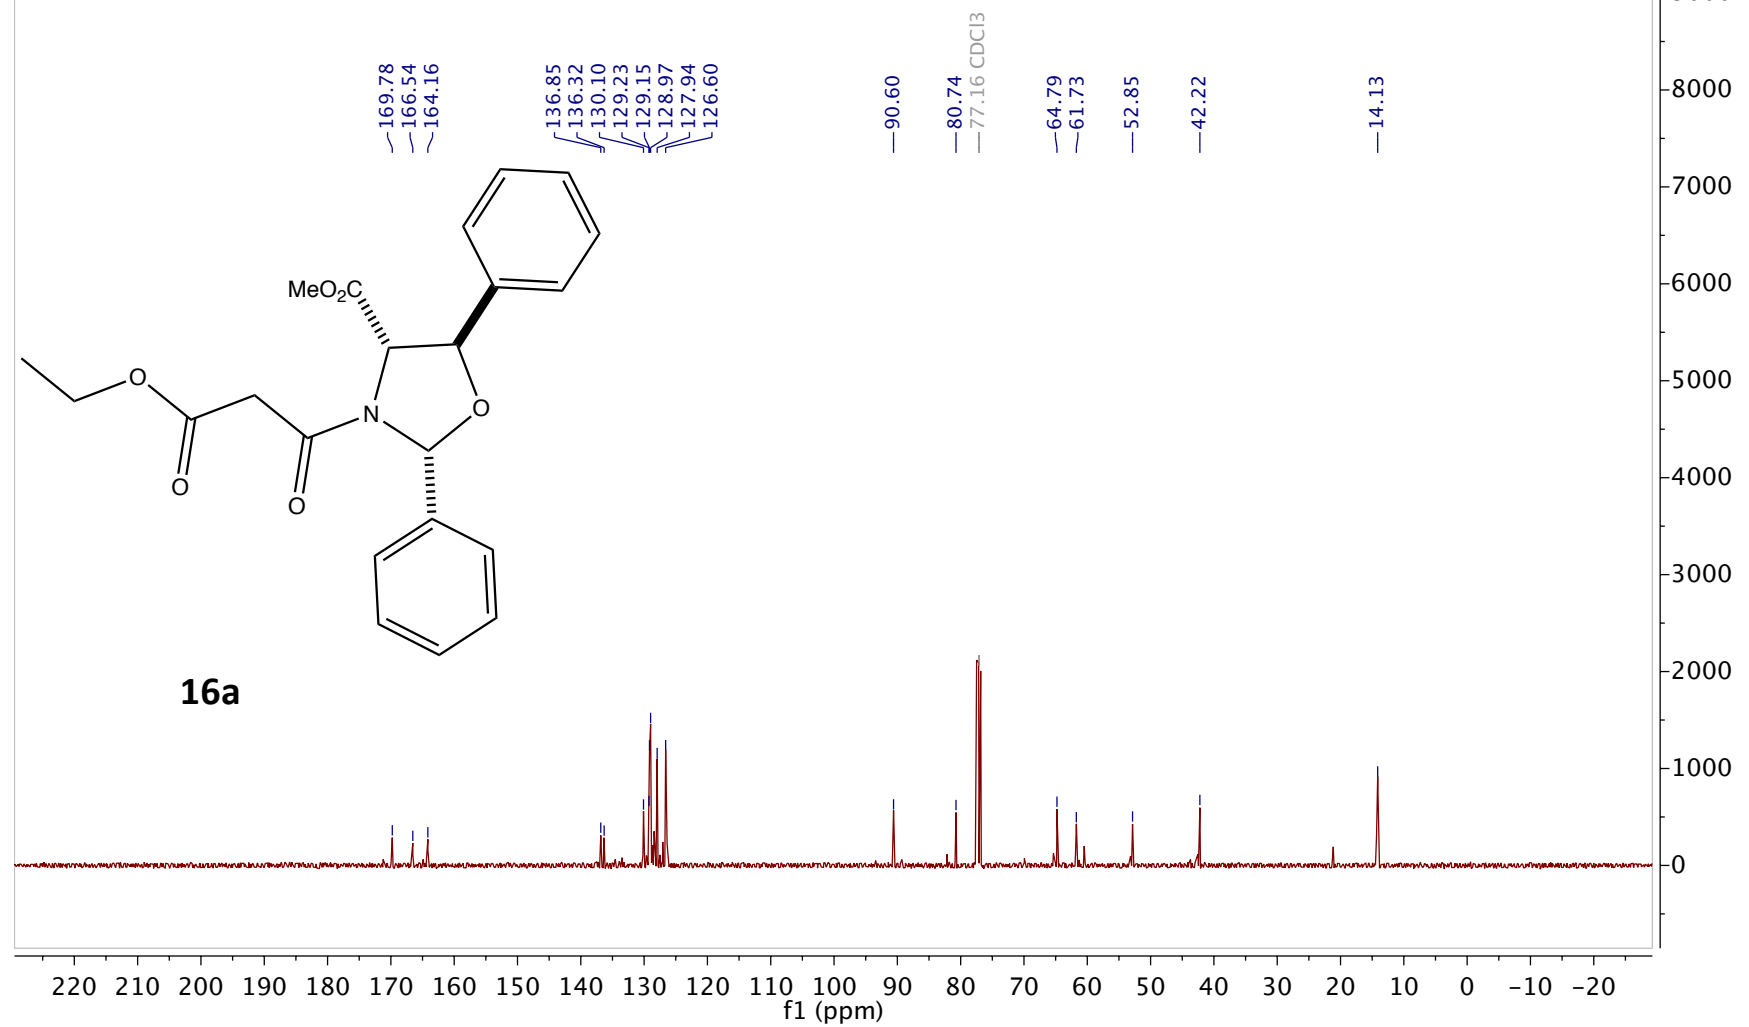

May04-2019-60-LS397(P) C4-D2.1.fid  
Instrument AVF400  
Chemist Liban Saney  
Group MGM  
Project Account Code DM7300  
h1acq.crl CDCl3 {C:\NMR} mgmgrp 60

<sup>1</sup>H NMR (400 MHz CDCl<sub>3</sub>)

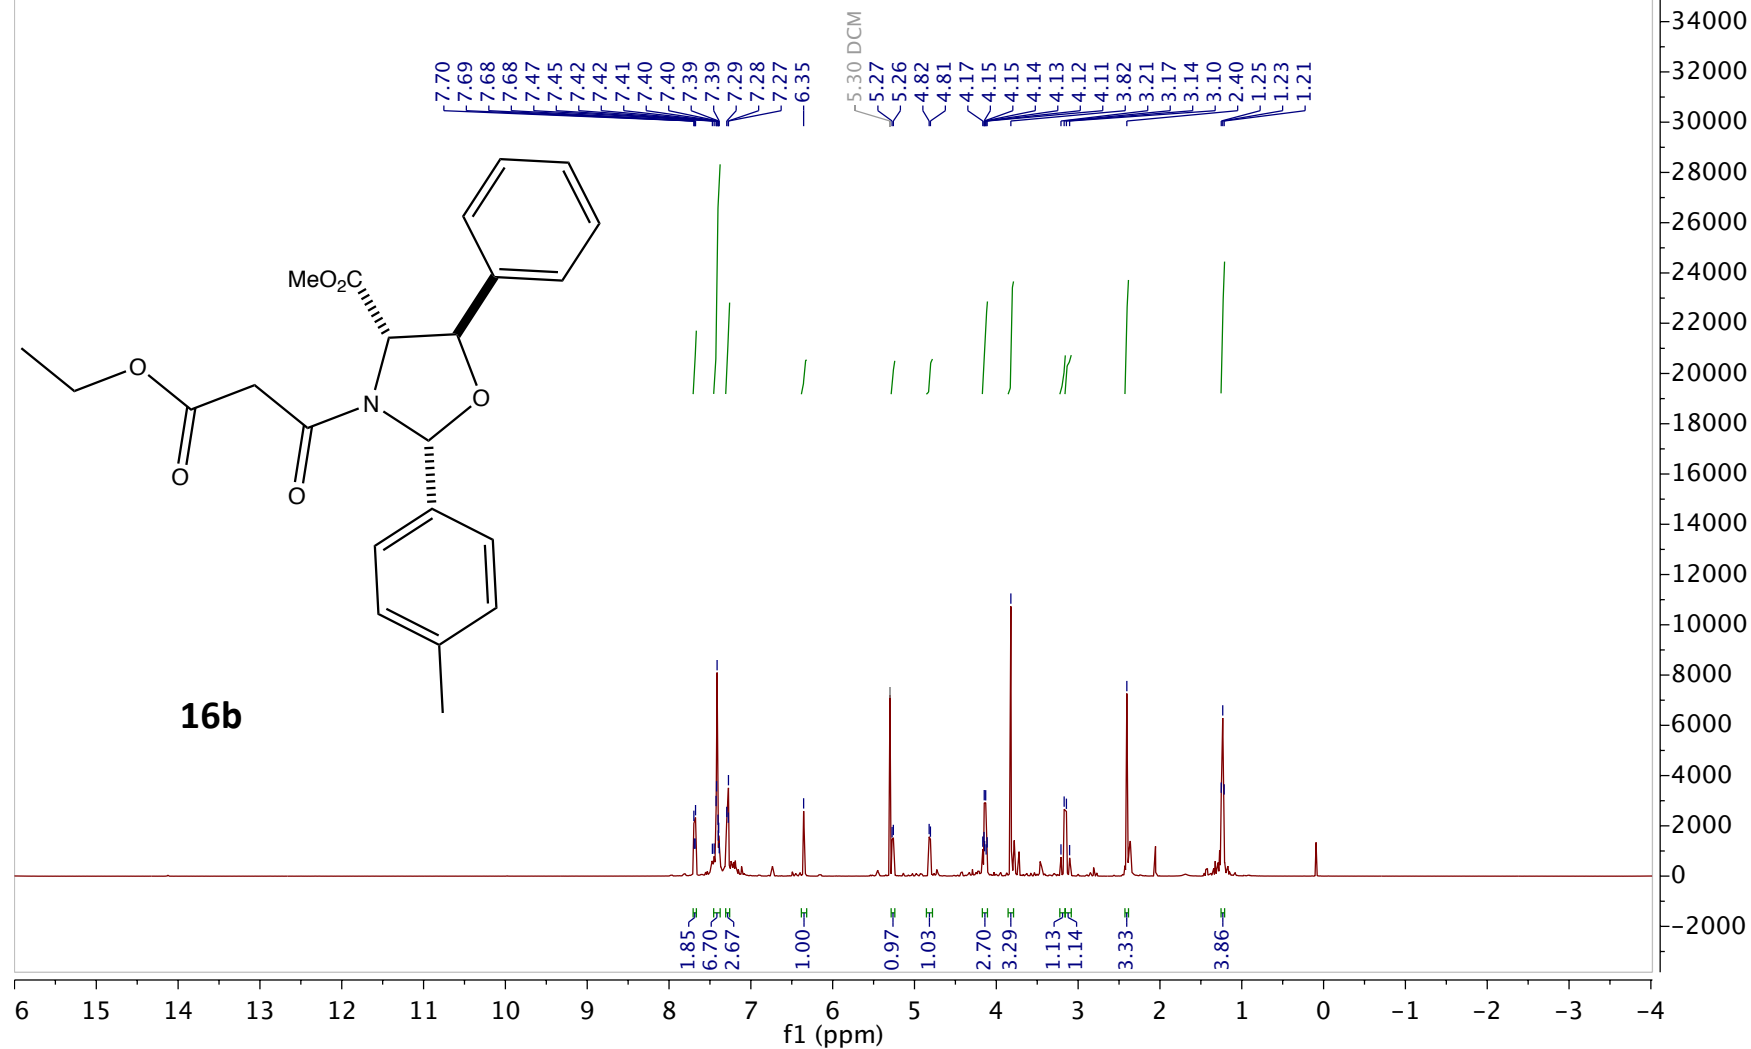

May04-2019-60-LS397(P) C4-D2.4.fid  
Instrument AVF400  
Chemist Liban Saney  
Group MGM  
Project Account Code DM7300  
c13acq\_512.crl CDCl3 {C:\NMR} mgmgrp 60

<sup>13</sup>C NMR (101 MHz CDCl<sub>3</sub>)

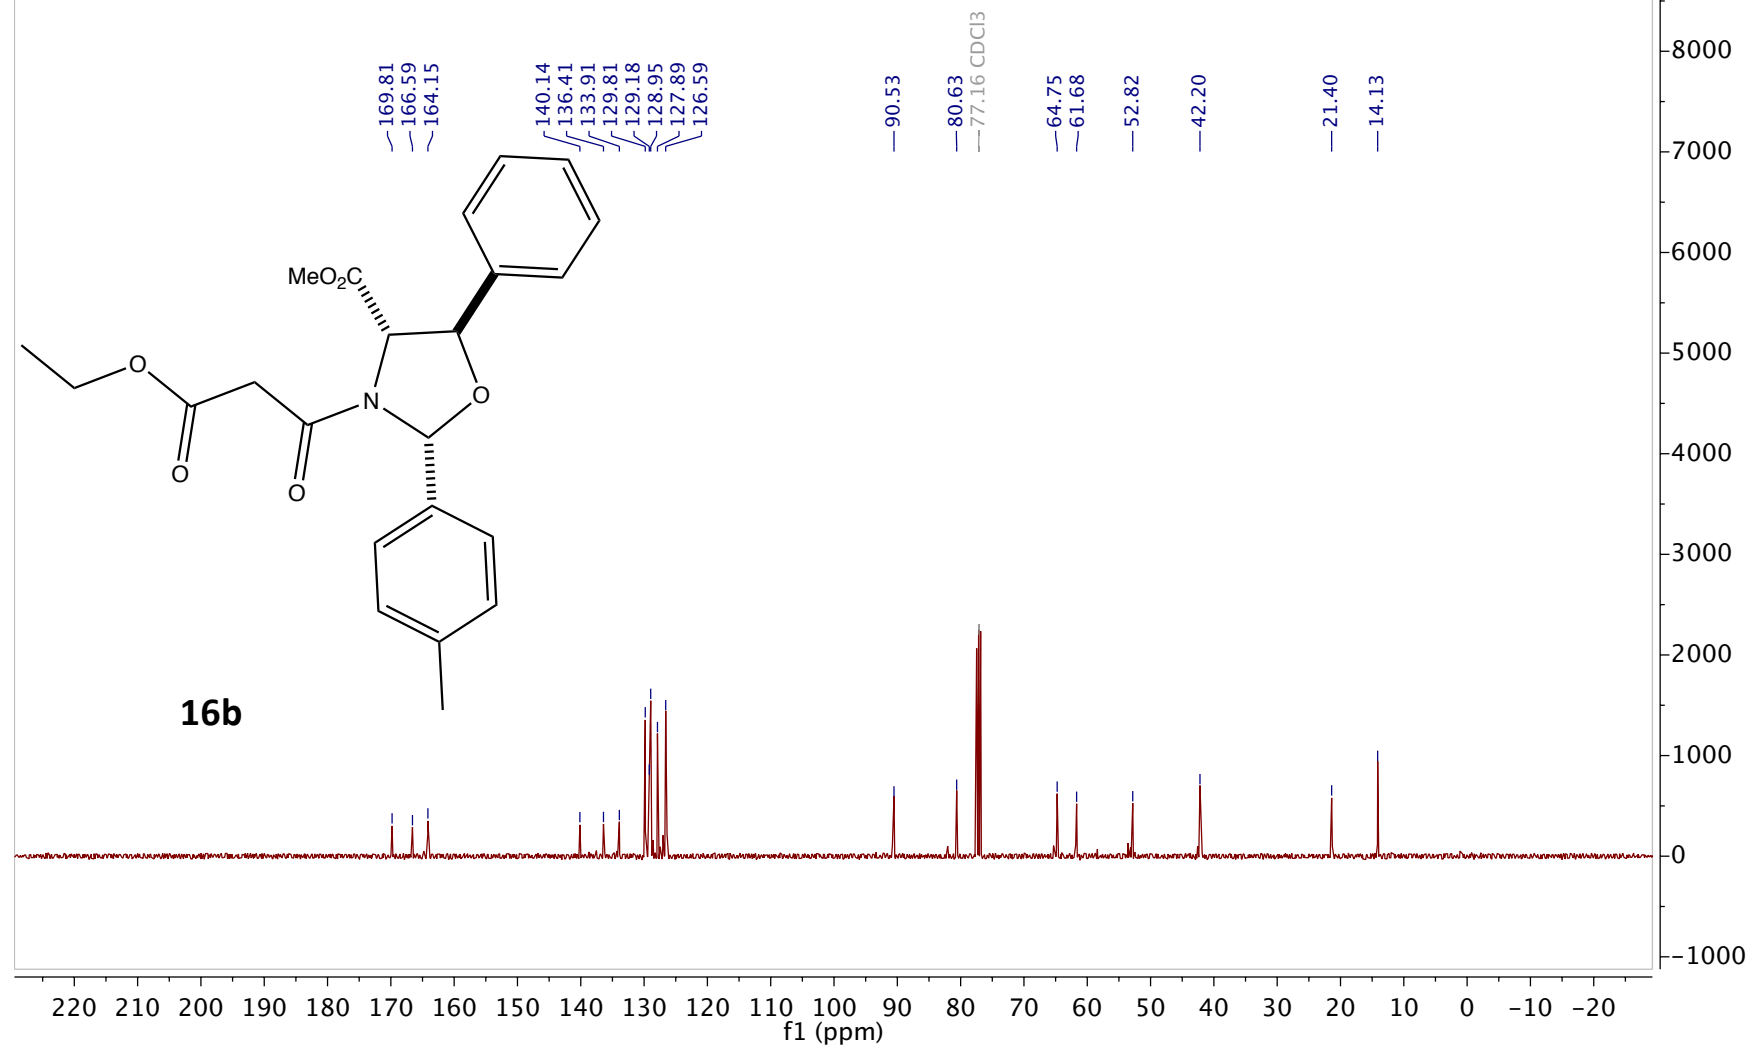

May03-2019-60-LS395(P) B11-D1.1.fid  
Instrument AVF400  
Chemist Liban Saney  
Group MGM  
Project Account Code DM7300  
h1acq.crl CDCl3 {C:\NMR} mgmgrp 60

<sup>1</sup>H NMR (400 MHz CDCl<sub>3</sub>)

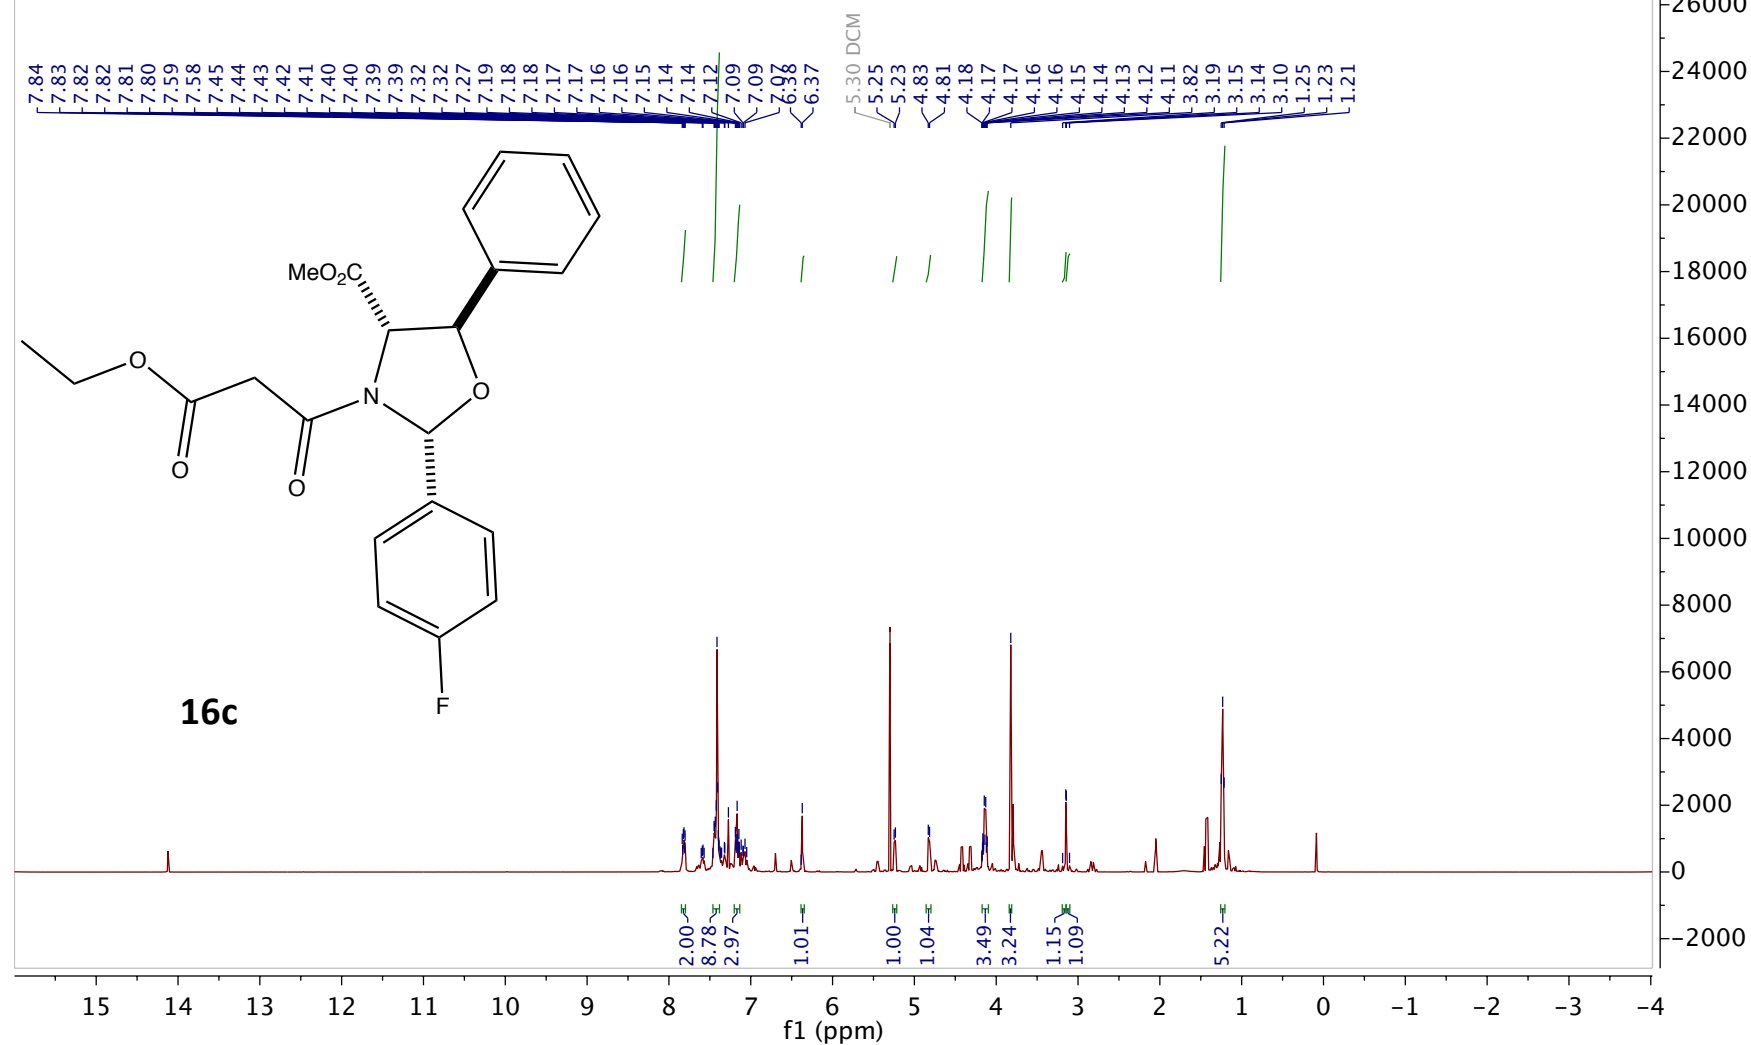

May03-2019-60-LS395(P) B11-D1.4.fid  
Instrument AVF400  
Chemist Liban Saney  
Group MGM  
Project Account Code DM7300  
c13acq\_512.crl CDCl3 {C:\NMR} mgmgrp 60

<sup>13</sup>C NMR (101 MHz CDCl<sub>3</sub>)

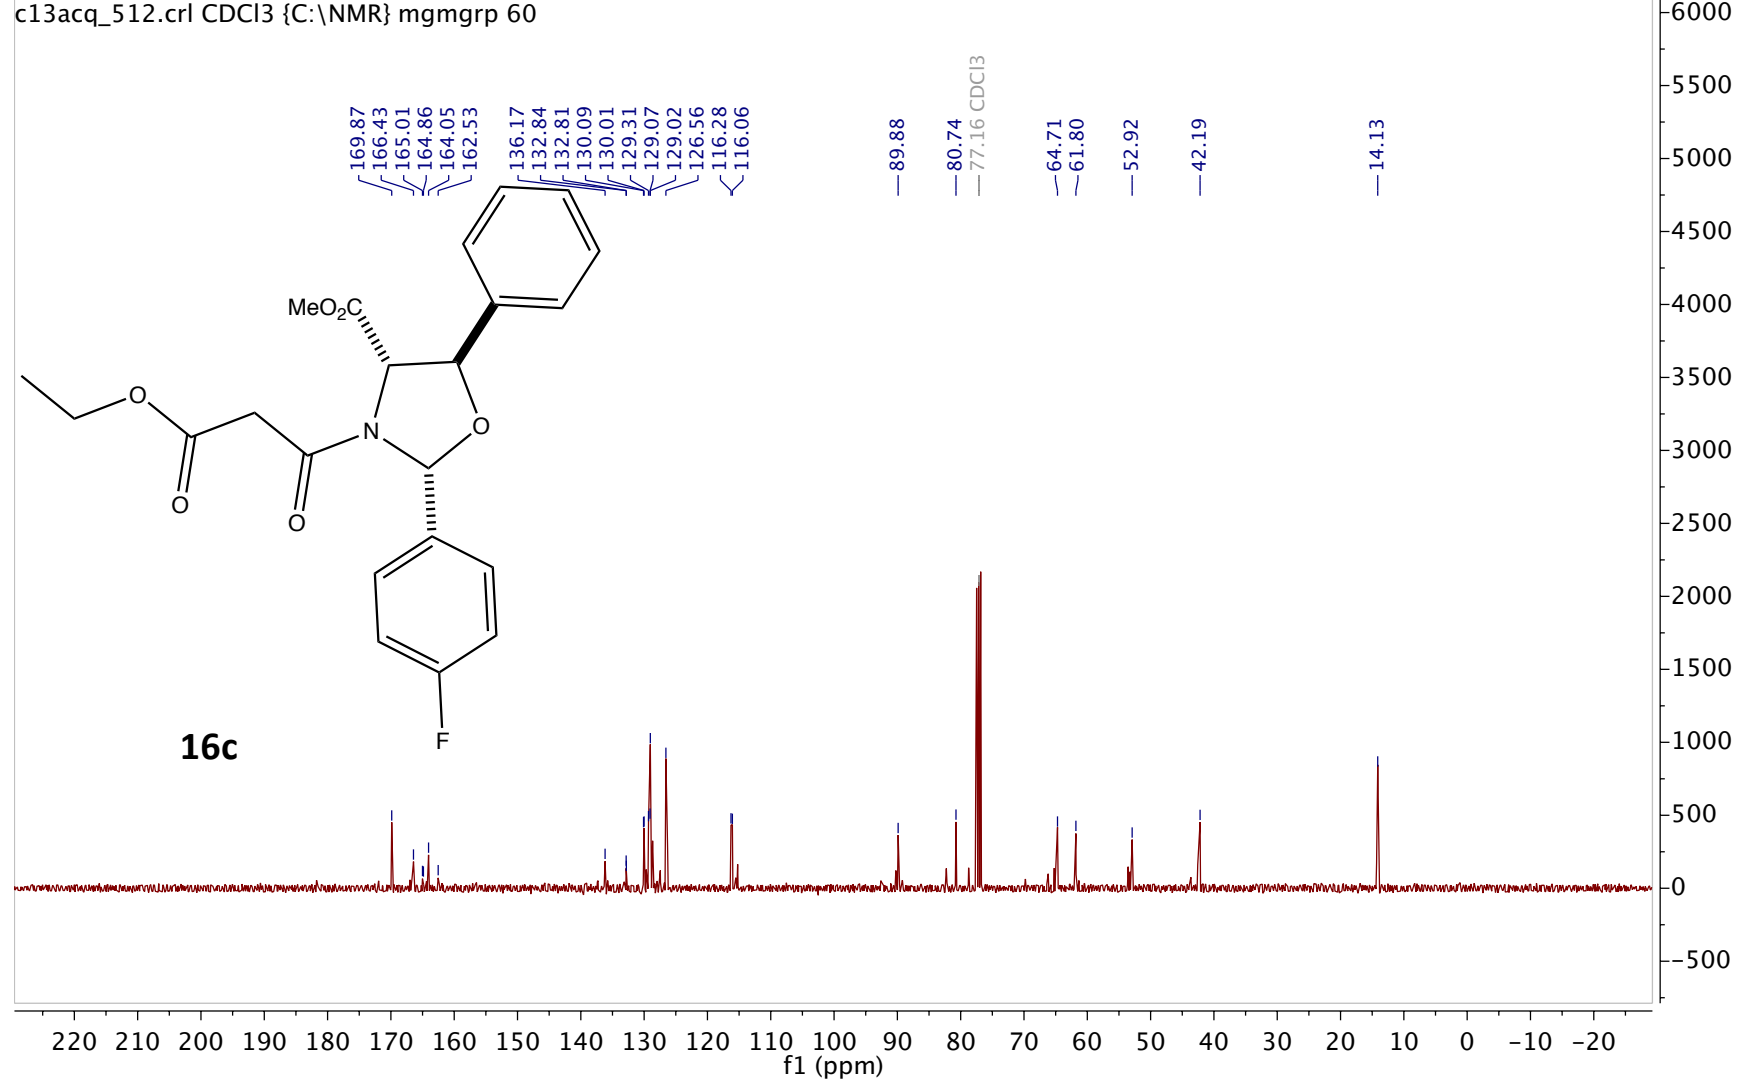

May03-2019-60-LS395(P) B11-D1.6.fid  
Instrument AVF400  
Chemist Liban Saney  
Group MGM  
Project Account Code DM7300  
f19acq.crl CDCl3 {C:\NMR} mgmgrp 60

$^{19}\text{F}$  NMR (377 MHz  $\text{CDCl}_3$ )

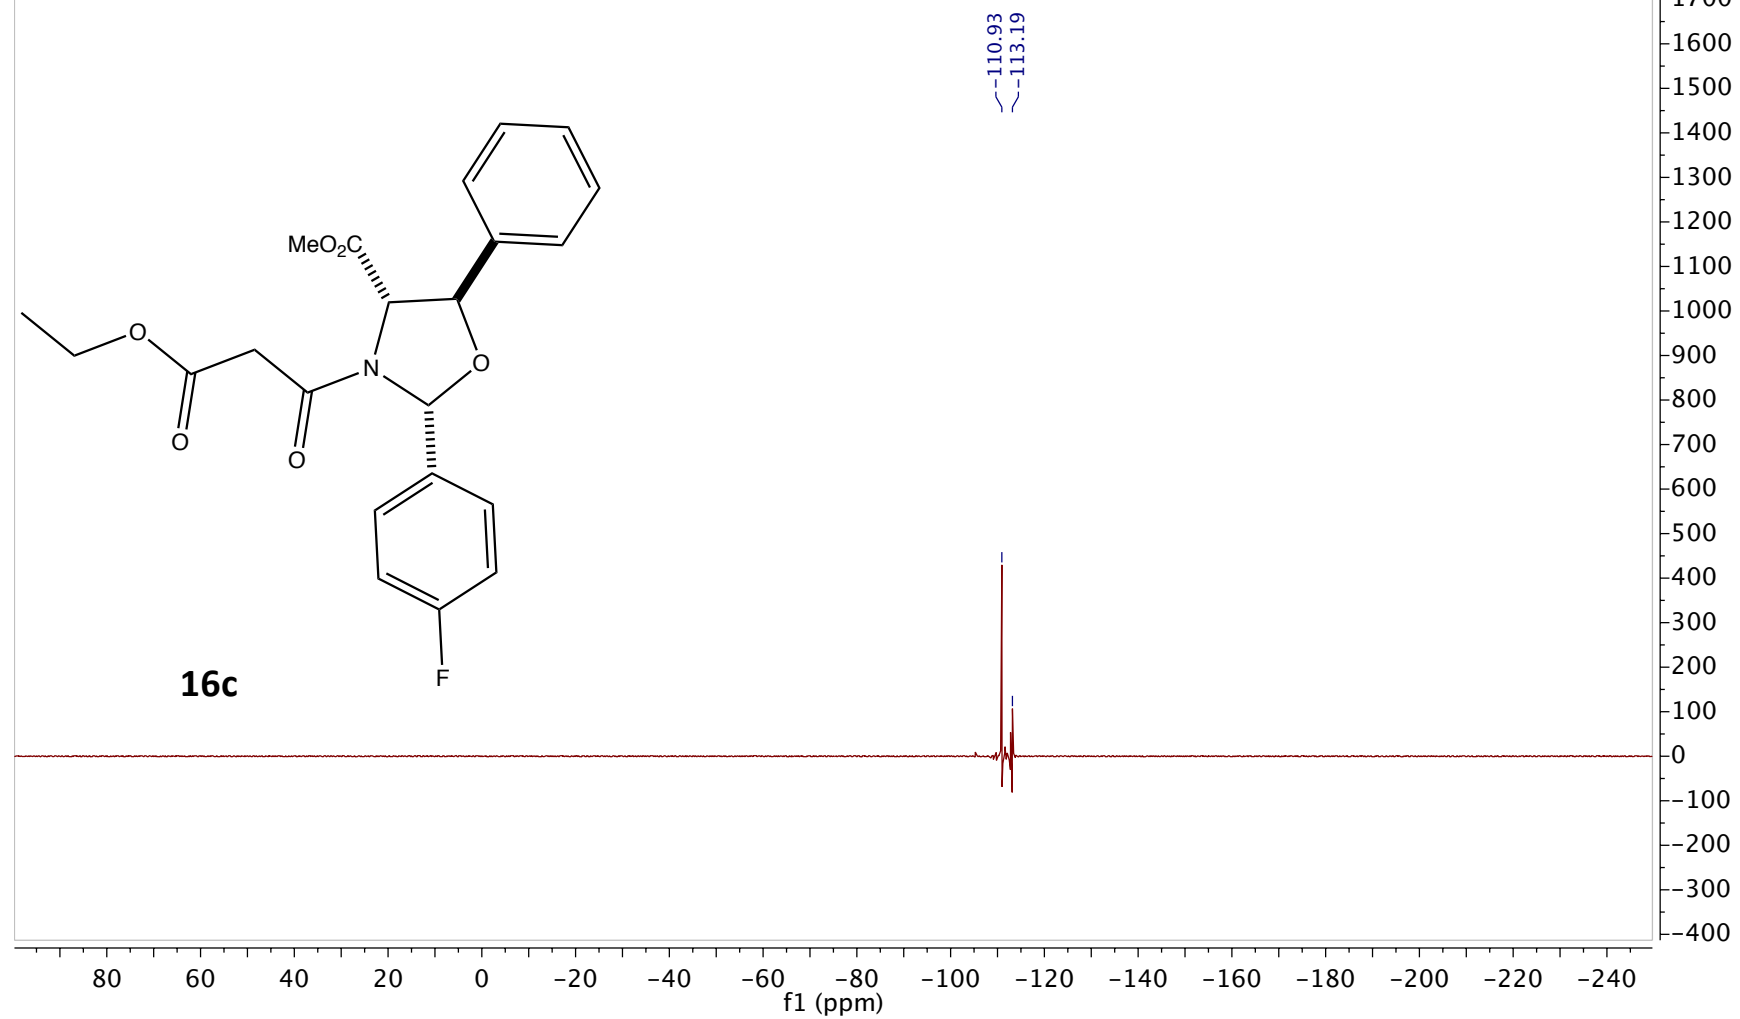

Apr13-2019-60-LS380(P) B10-C7.1.fid  
Instrument AVF400  
Chemist Liban Saney  
Group MGM  
Project Account Code DM7300  
h1acq.crl CDCl3 {C:\NMR} mgmgrp 60

<sup>1</sup>H NMR (400 MHz CDCl<sub>3</sub>)

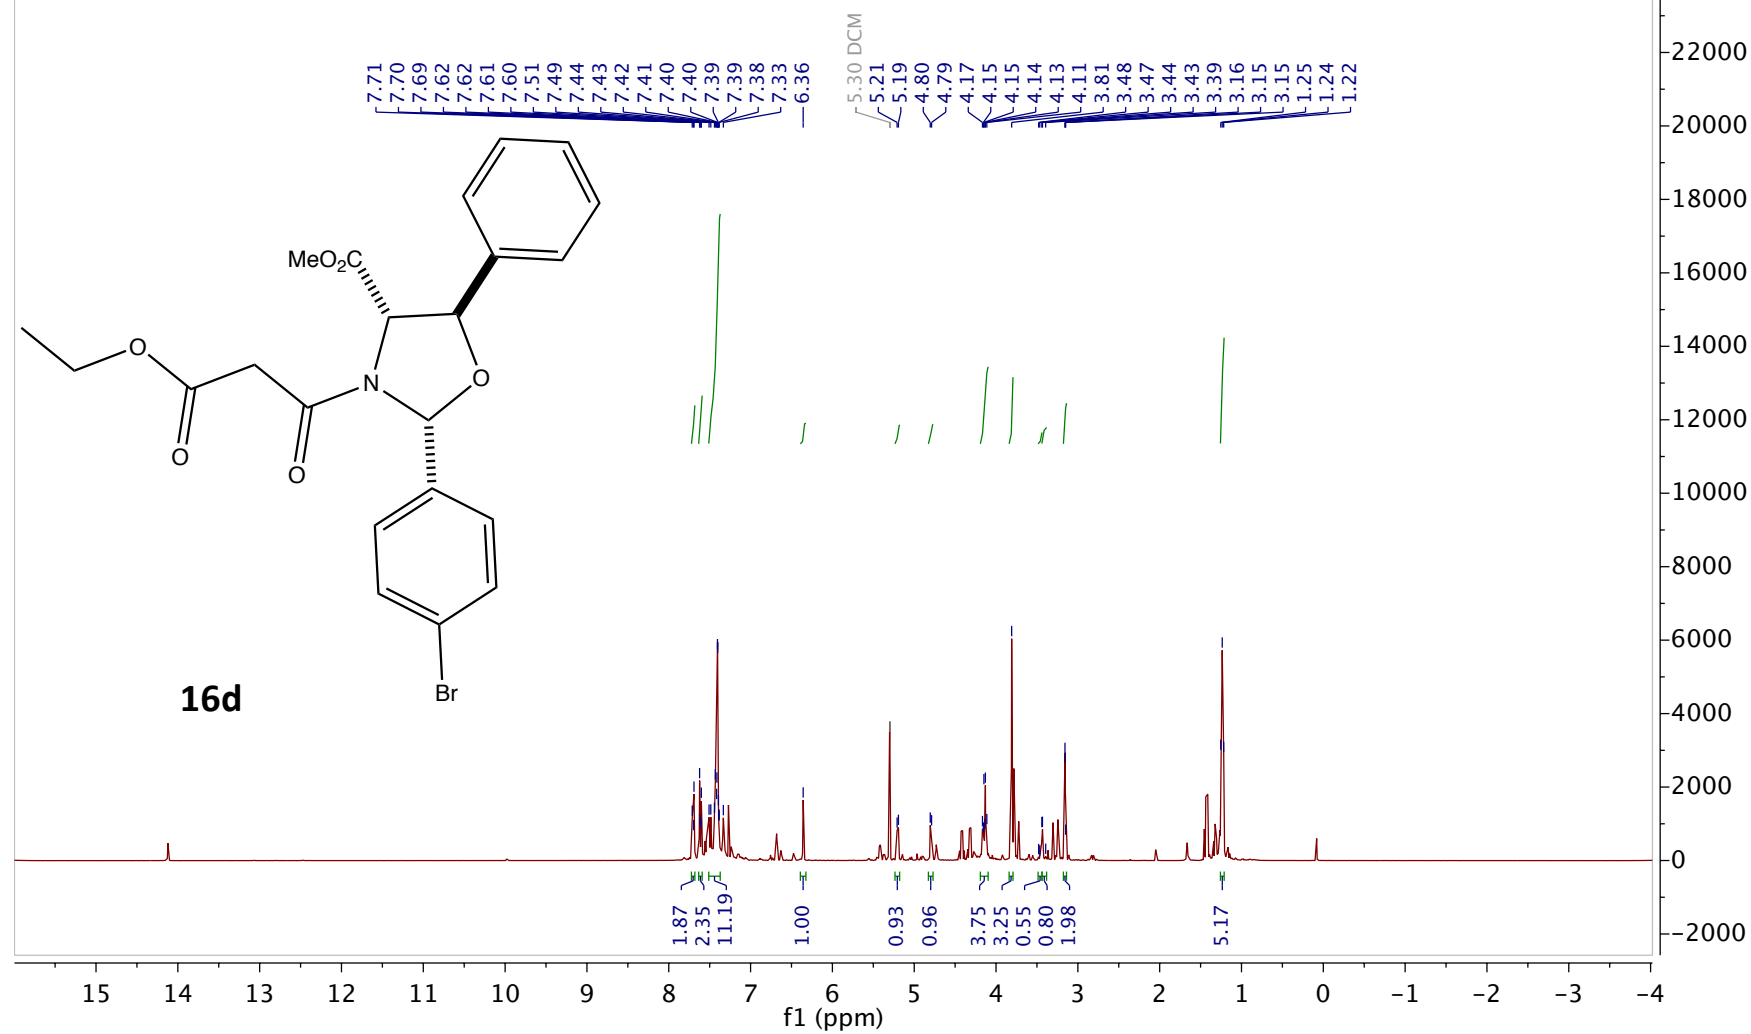



Apr13-2019-60-LS380(P) B10-C7.4.fid  
Instrument AVF400  
Chemist Liban Saney  
Group MGM  
Project Account Code DM7300  
c13acq\_512.crl CDCl3 {C:\NMR} mgmgrp 60

<sup>13</sup>C NMR (101 MHz CDCl<sub>3</sub>)

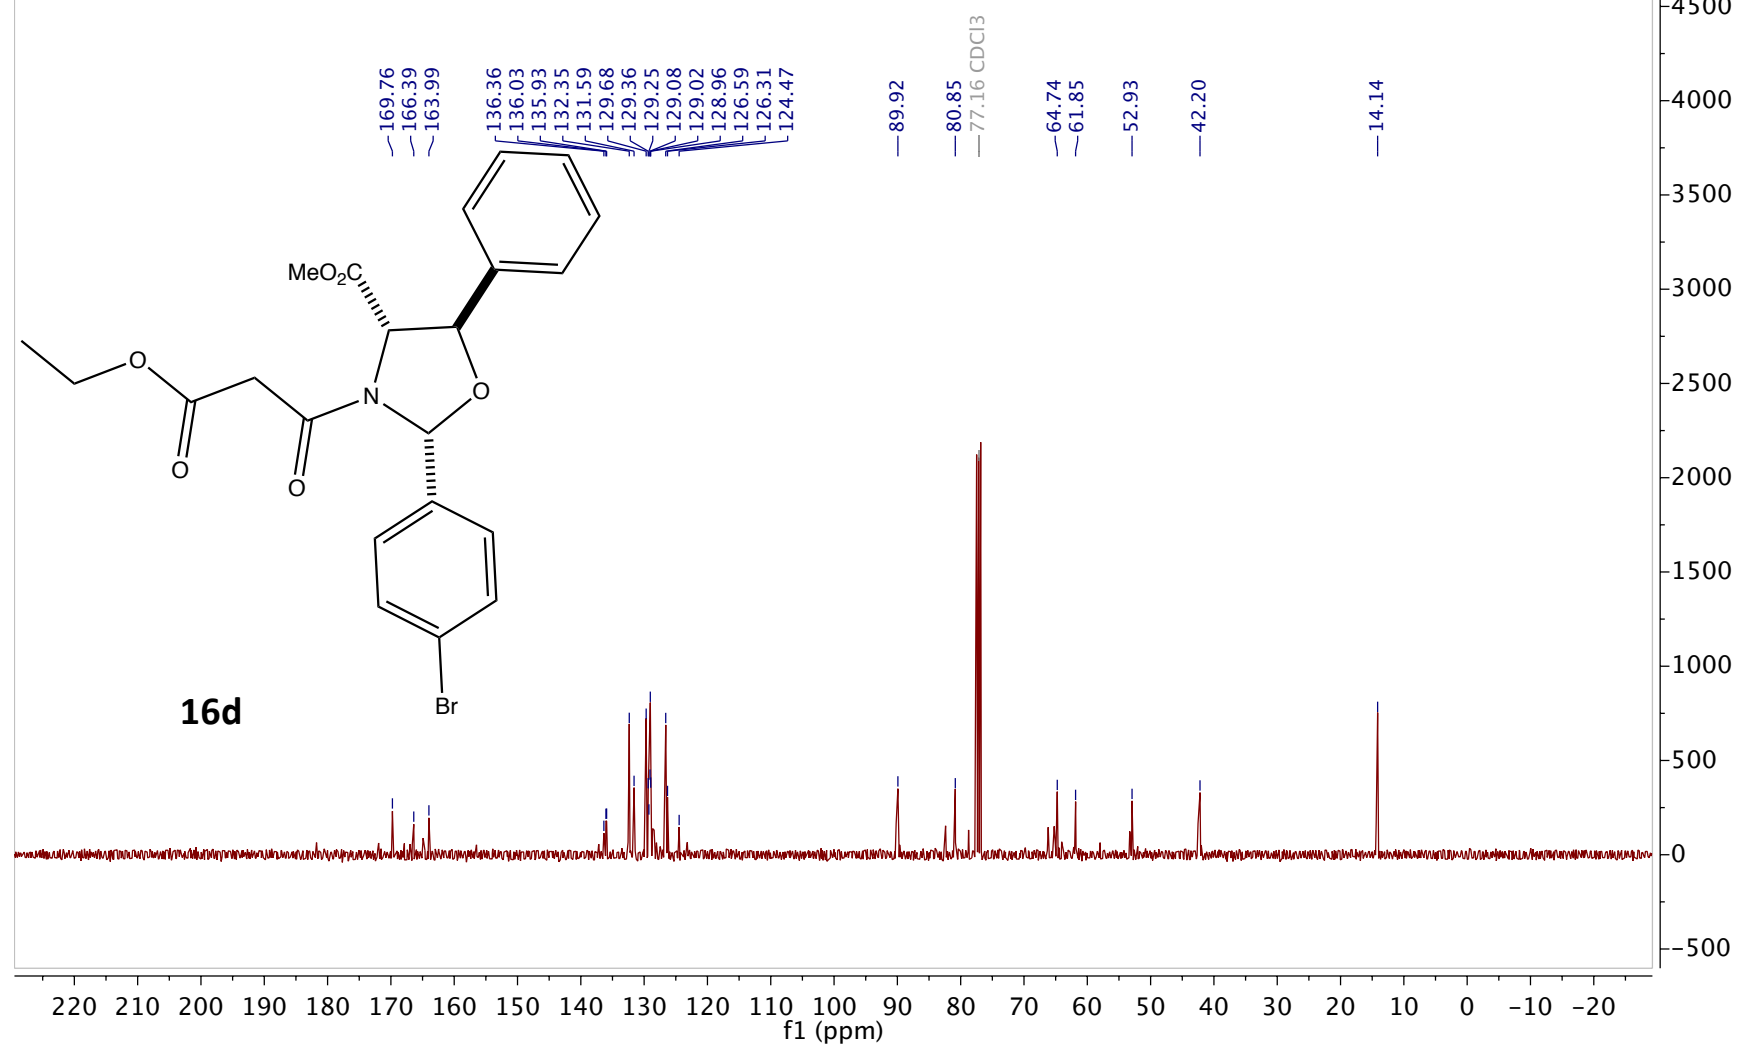

Apr06-2019-60-LS370(P) D9-E5.1.fid  
Instrument AVF400  
Chemist Liban Saney  
Group MGM  
Project Account Code DM7300  
h1acq.crl CDCl3 {C:\NMR} mgmgrp 60

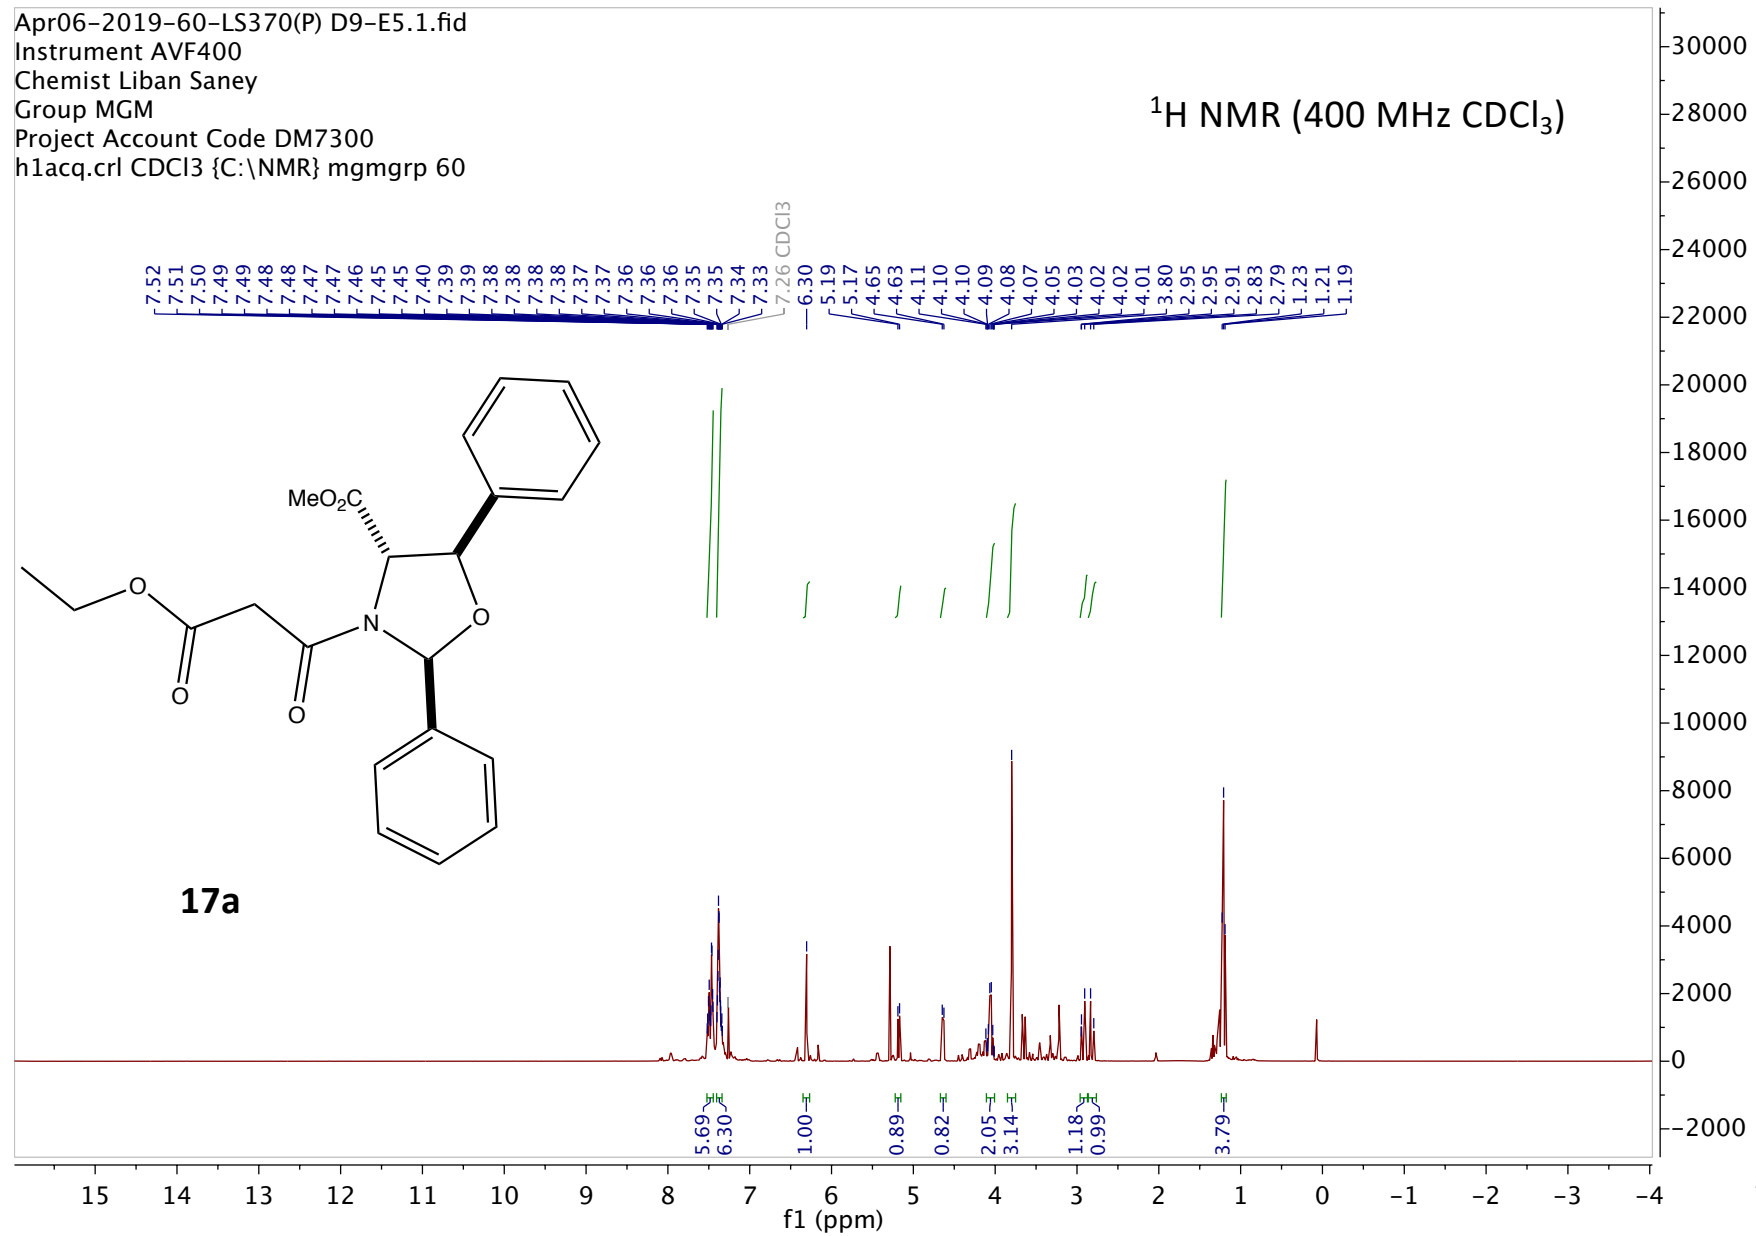

Apr06-2019-60-LS370(P) D9-E5.5.fid  
Instrument AVF400  
Chemist Liban Saney  
Group MGM  
Project Account Code DM7300  
c13acq\_512.crl CDCl3 {C:\NMR} mgmgrp 60

<sup>13</sup>C NMR (101 MHz CDCl<sub>3</sub>)

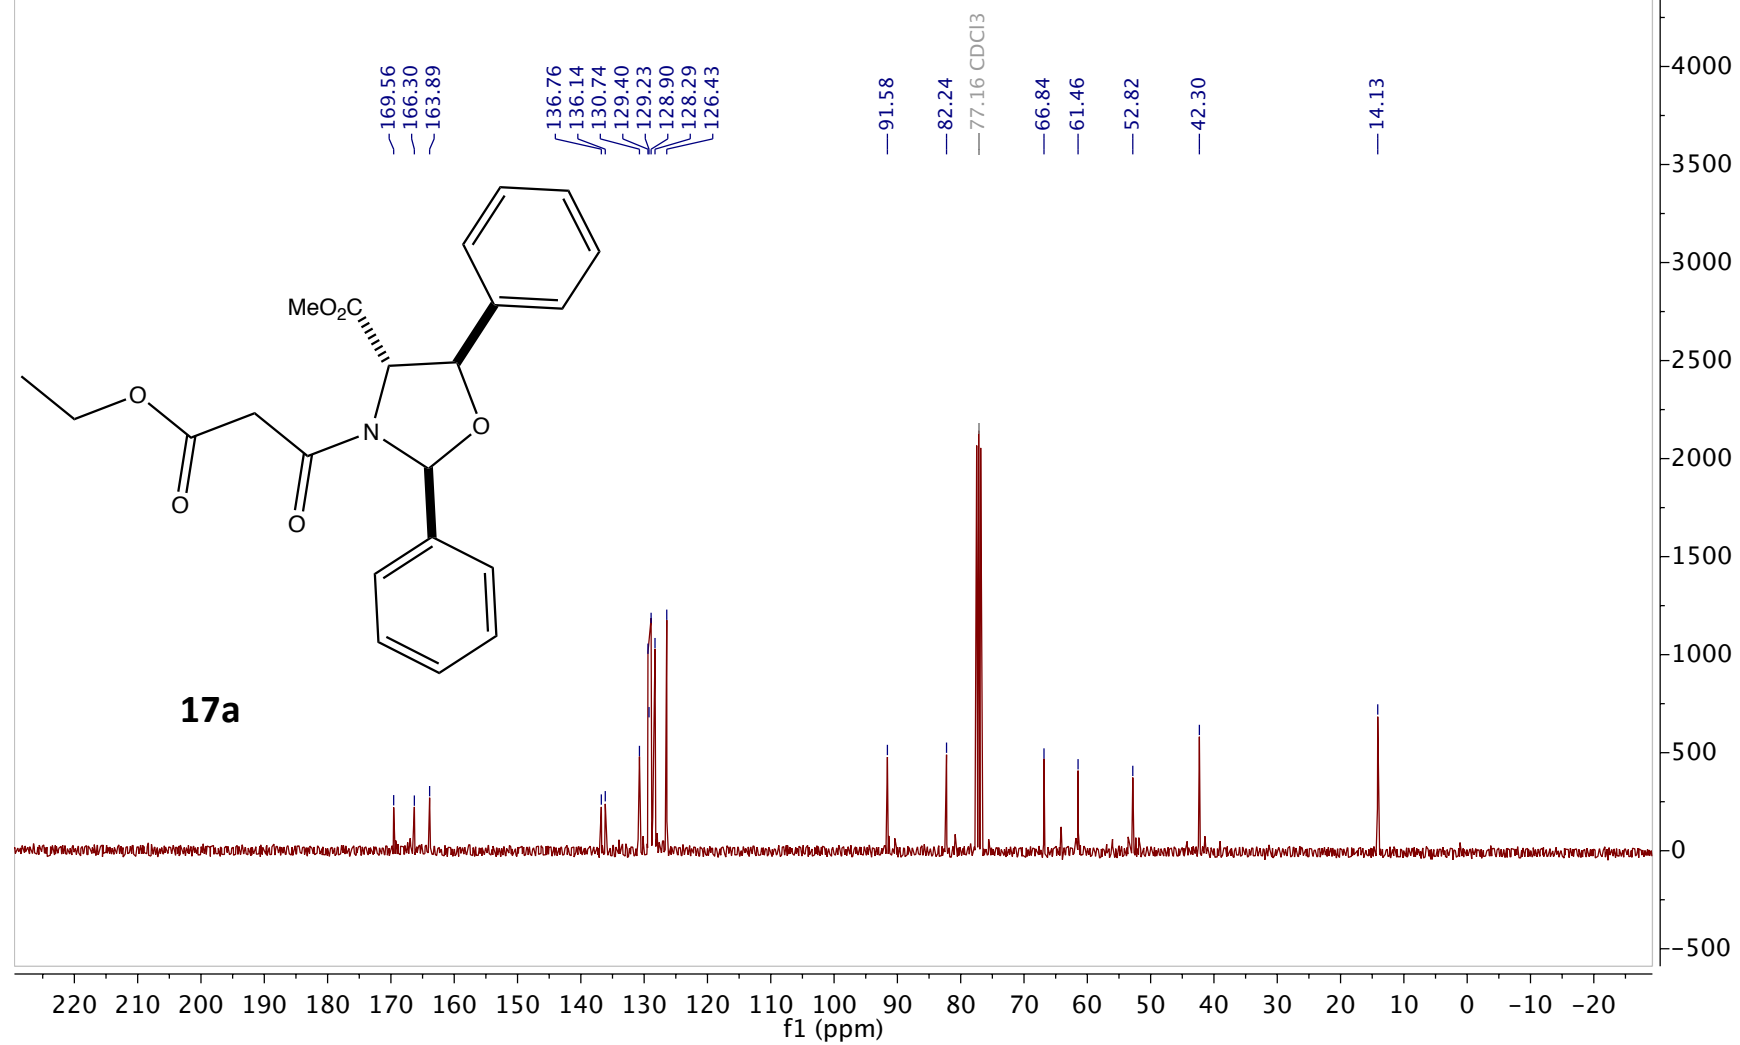

May04-2019-58-LS397(P) D7-H1.1.fid  
Instrument AVF400  
Chemist Liban Saney  
Group MGM  
Project Account Code DM7300  
h1acq.crl CDCl3 {C:\NMR} mgmgrp 58

<sup>1</sup>H NMR (400 MHz CDCl<sub>3</sub>)

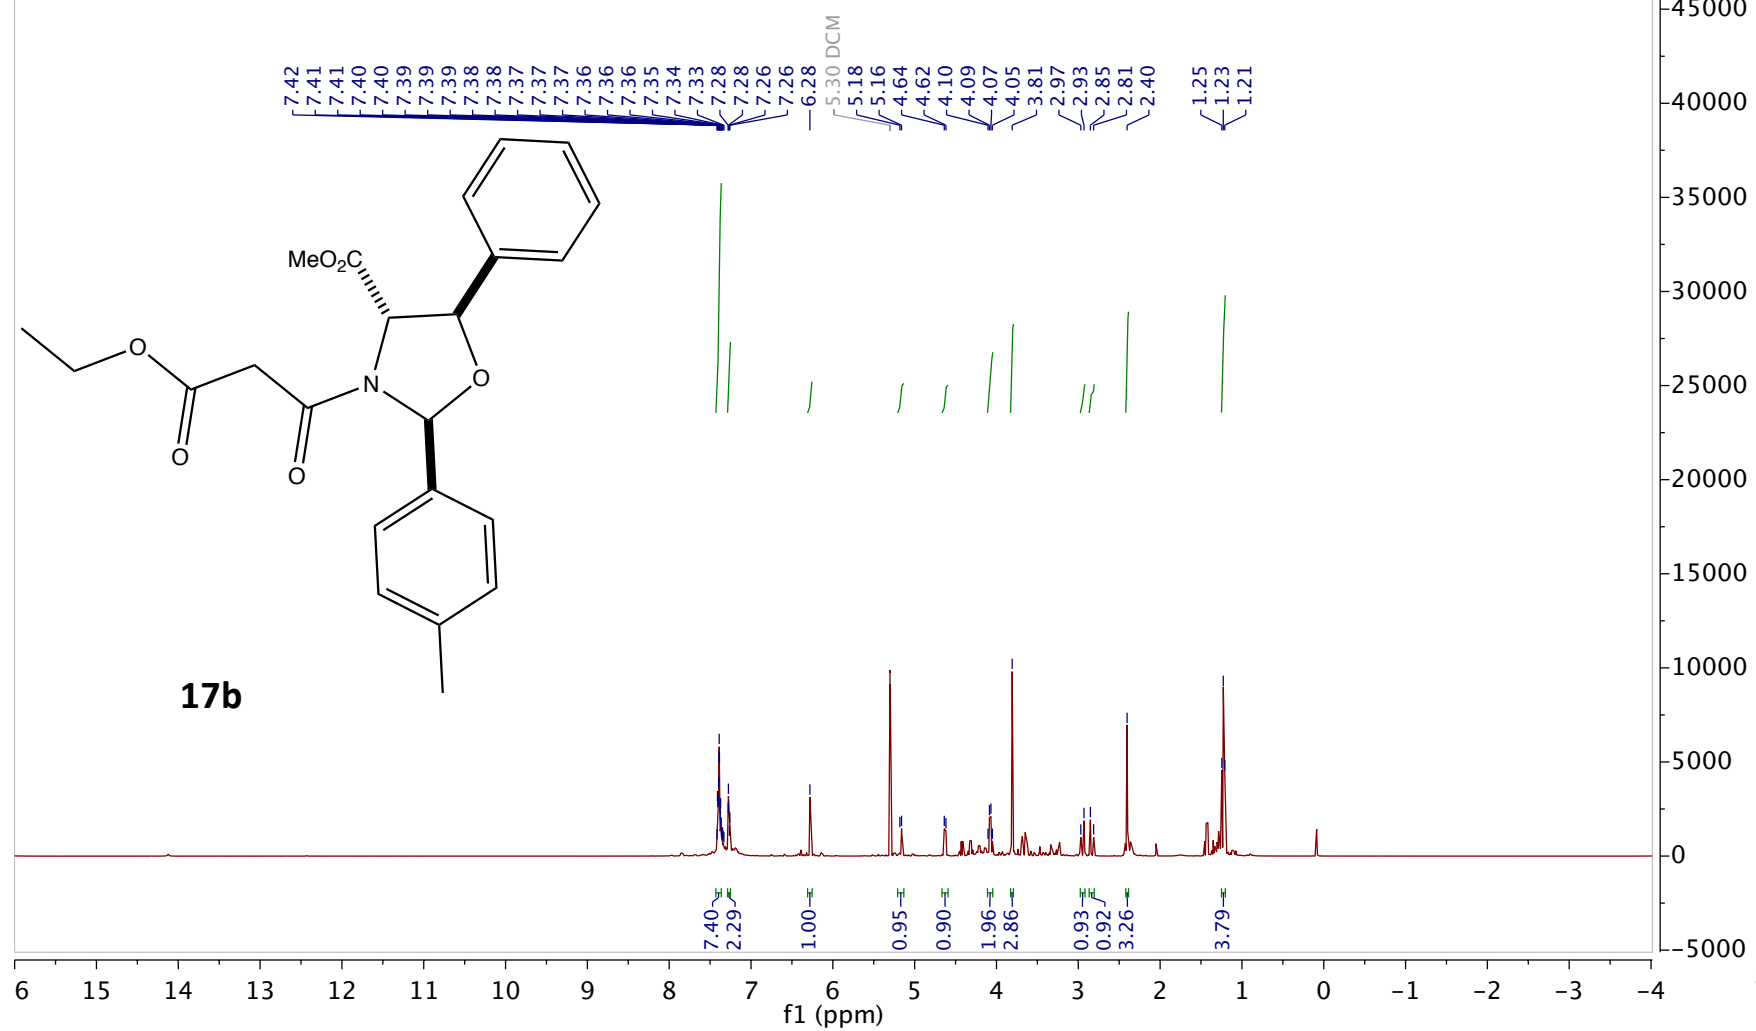

May04-2019-58-LS397(P) D7-H1.4.fid  
Instrument AVF400  
Chemist Liban Saney  
Group MGM  
Project Account Code DM7300  
c13acq\_512.crl CDCl3 {C:\NMR} mgmgrp 58

<sup>13</sup>C NMR (101 MHz CDCl<sub>3</sub>)

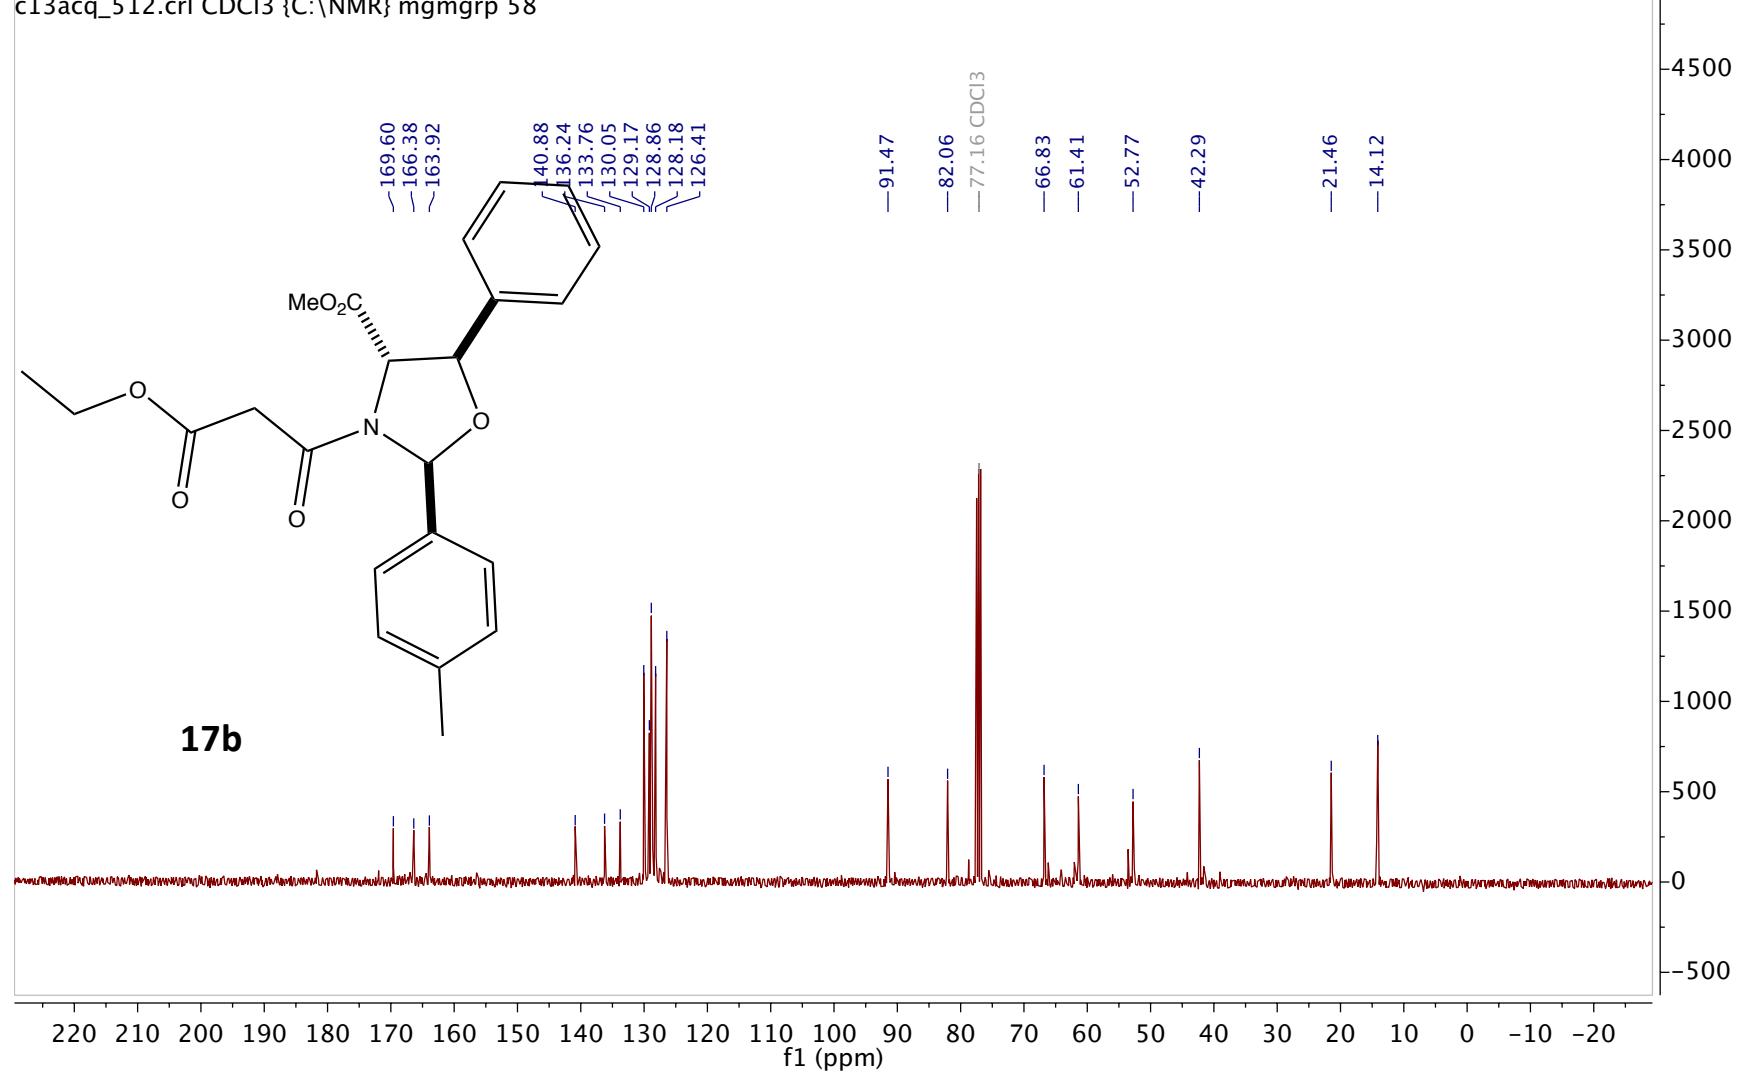

May03-2019-57-LS395(P) D3-F1.1.fid  
Instrument AVF400  
Chemist Liban Saney  
Group MGM  
Project Account Code DM7300  
h1acq.crl CDCl3 {C:\NMR} mgmgrp 57

<sup>1</sup>H NMR (400 MHz CDCl<sub>3</sub>)

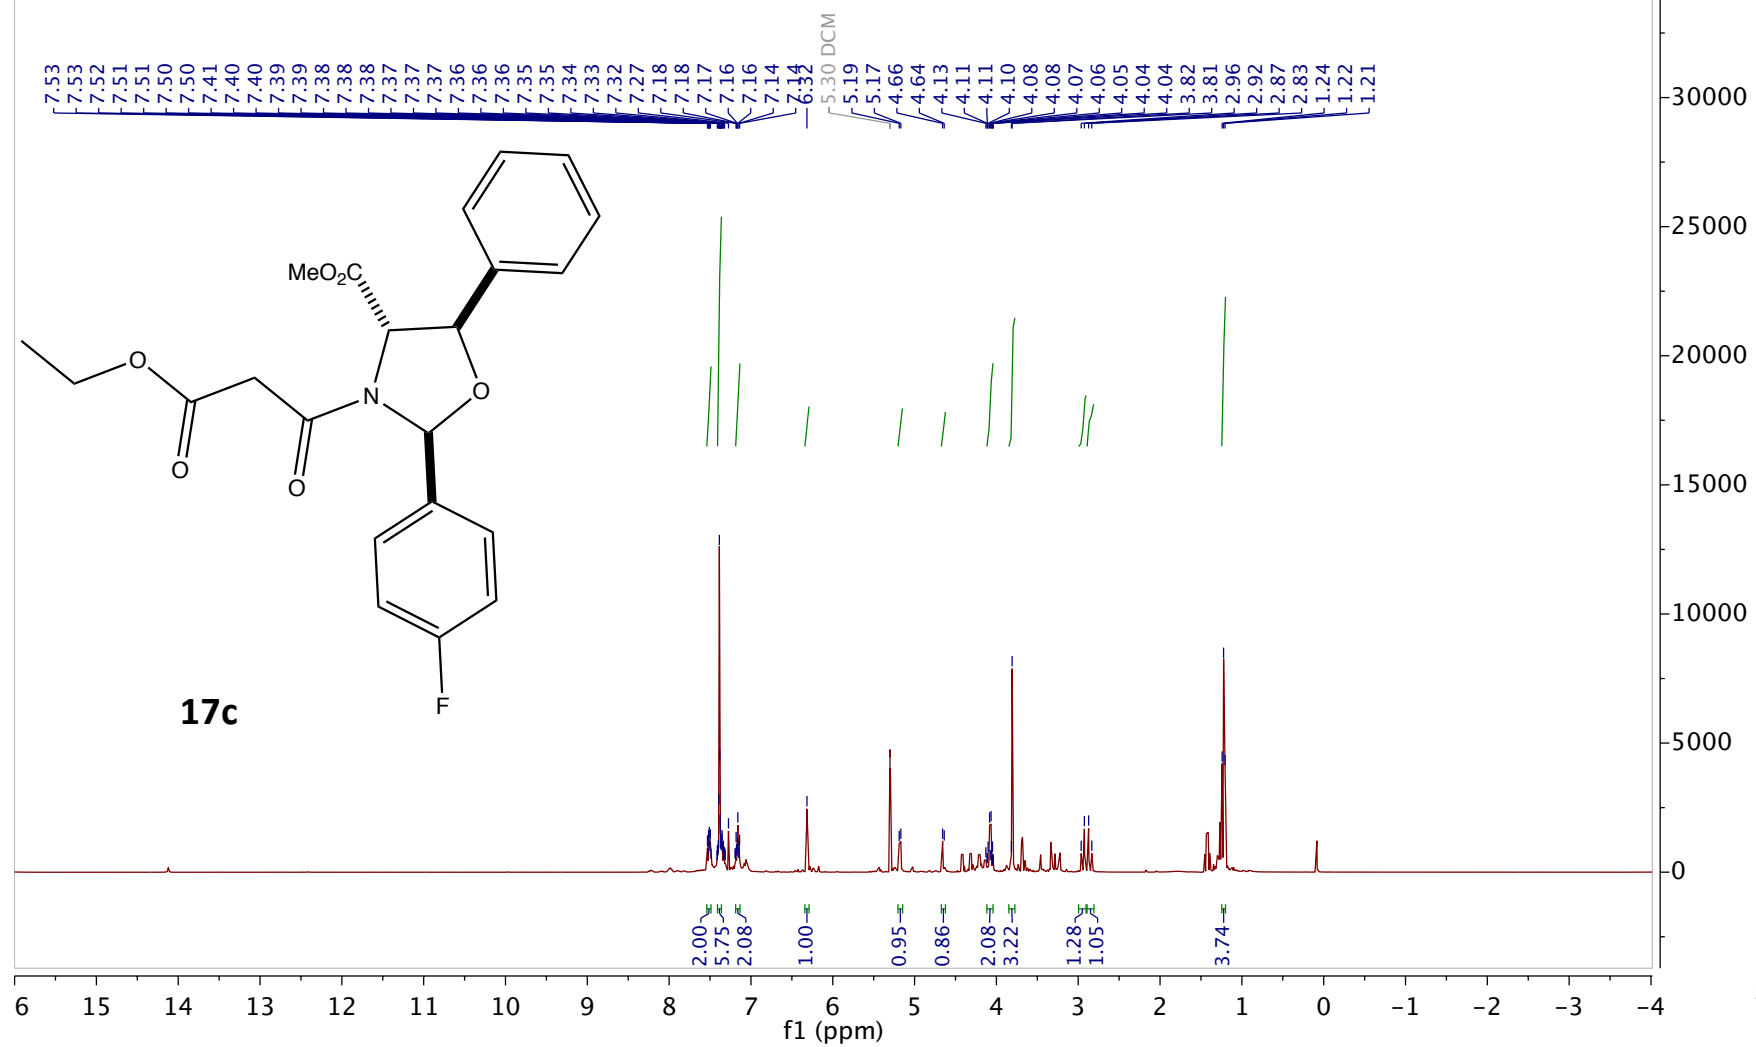

May03-2019-57-LS395(P) D3-F1.4.fid  
Instrument AVF400  
Chemist Liban Saney  
Group MGM  
Project Account Code DM7300  
c13acq\_512.crl CDCl3 {C:\NMR} mgmgrp 57

$^{13}\text{C}$  NMR (101 MHz  $\text{CDCl}_3$ )

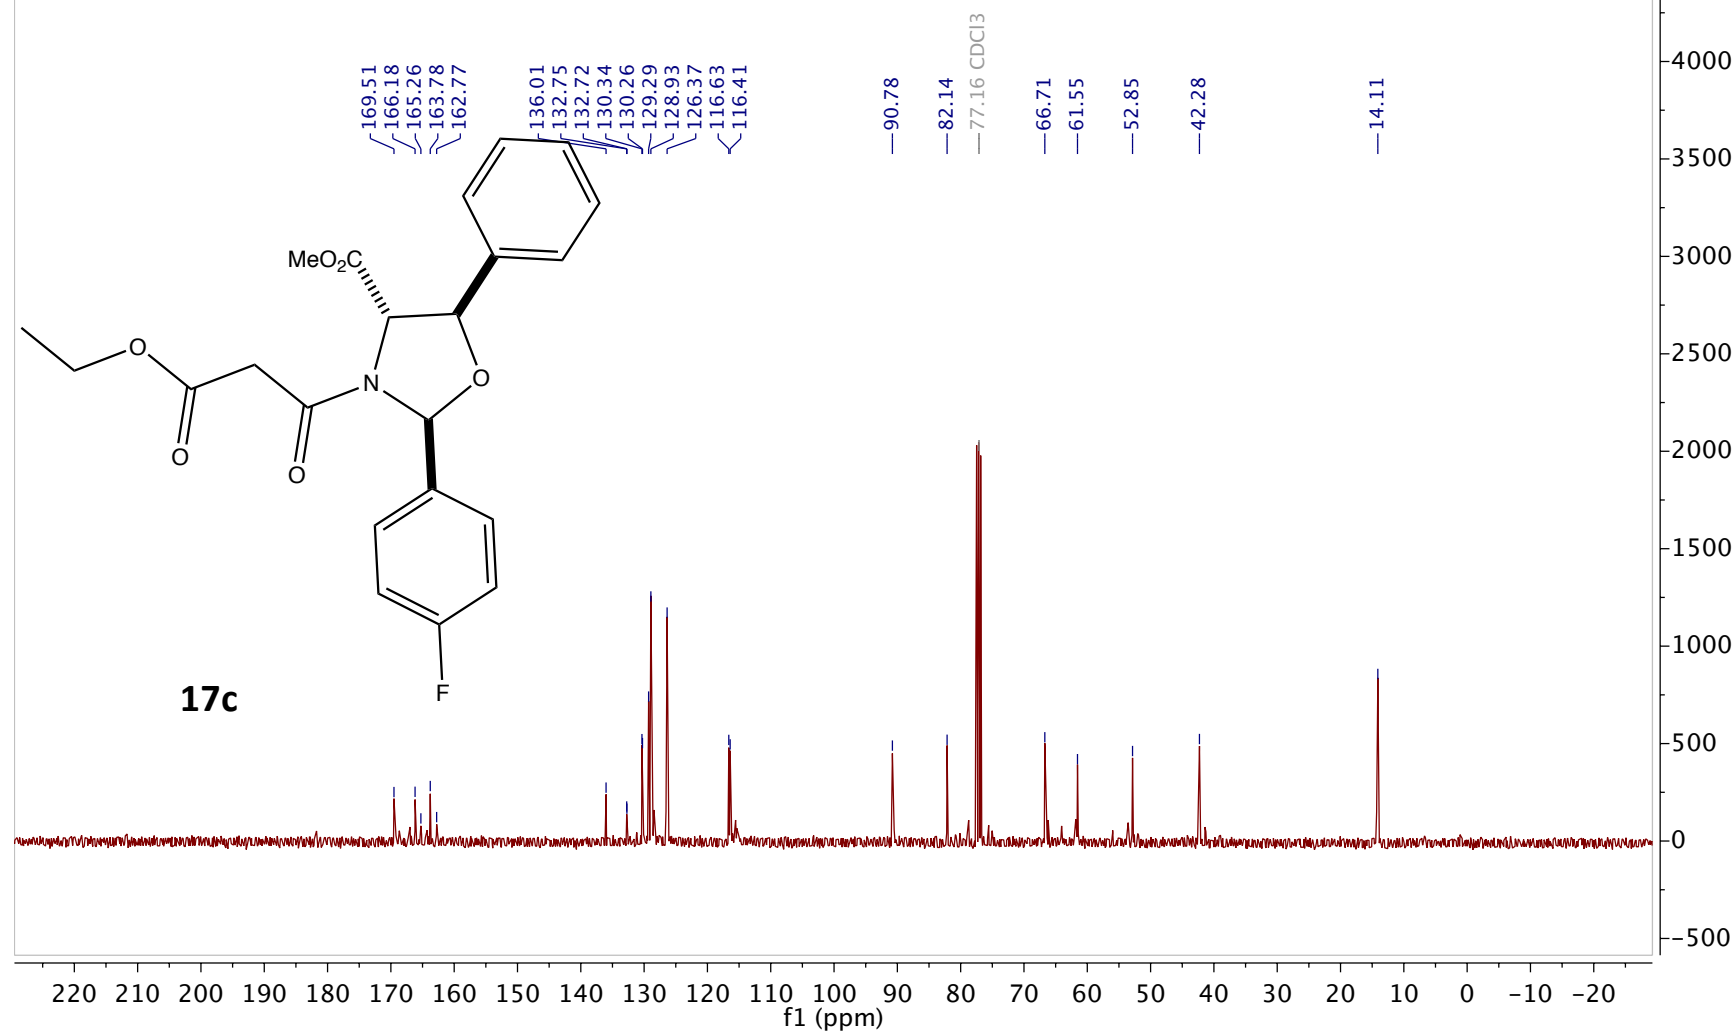

May03-2019-57-LS395(P) D3-F1.6.fid  
Instrument AVF400  
Chemist Liban Saney  
Group MGM  
Project Account Code DM7300  
f19acq.crl CDCl3 {C:\NMR} mgmgrp 57

$^{19}\text{F}$  NMR (377 MHz  $\text{CDCl}_3$ )

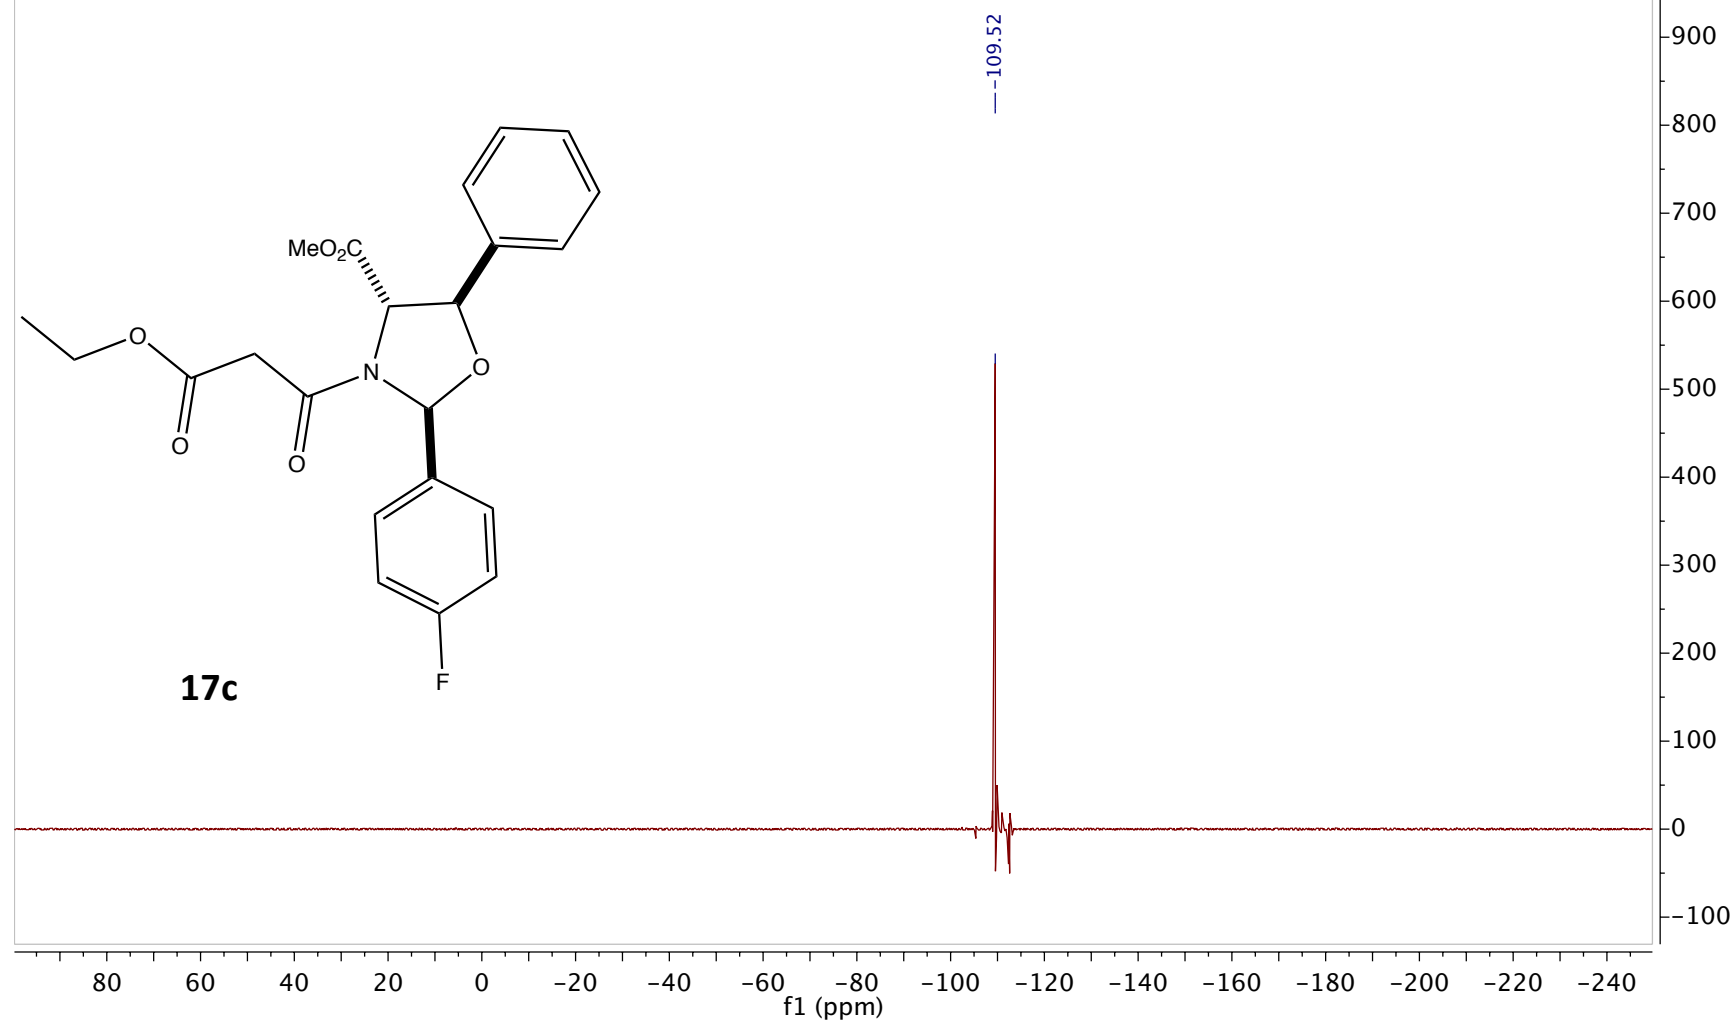



Apr13-2019-59-LS380(P) C10-E2.1.fid  
Instrument AVF400  
Chemist Liban Saney  
Group MGM  
Project Account Code DM7300  
h1acq.crl CDCl3 {C:\NMR} mgmgrp 59

<sup>1</sup>H NMR (400 MHz CDCl<sub>3</sub>)

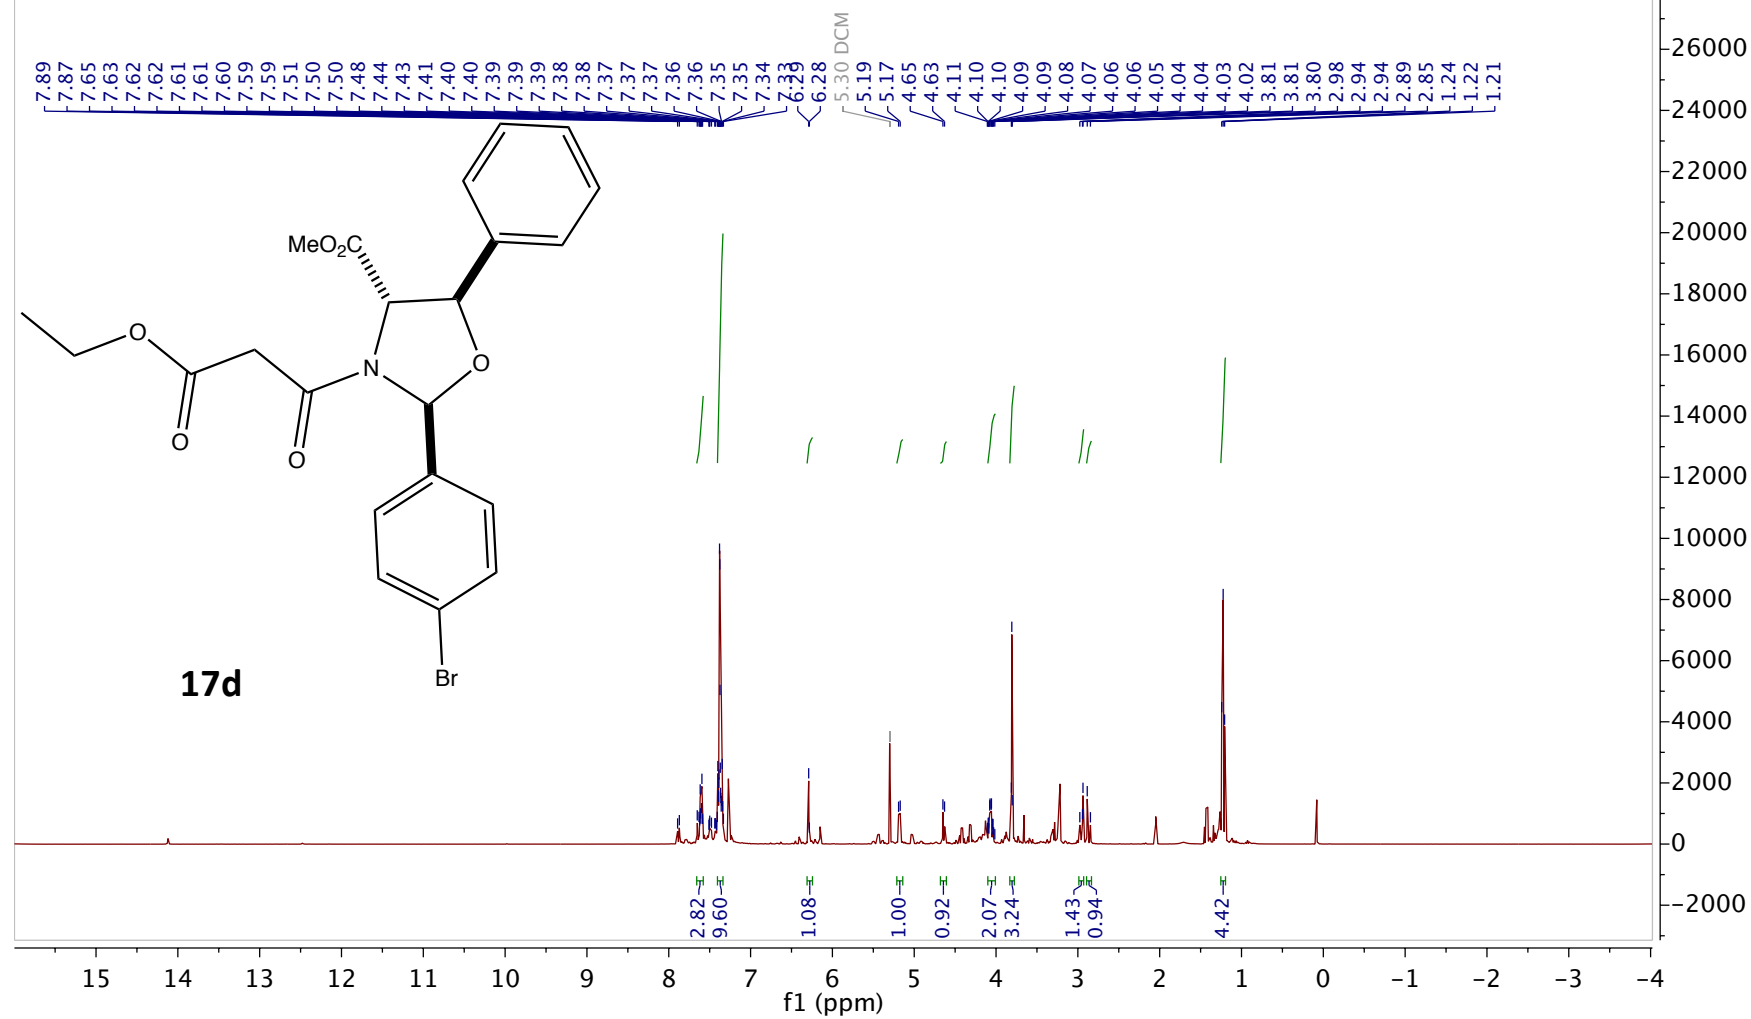

Apr13-2019-59-LS380(P) C10-E2.4.fid  
Instrument AVF400  
Chemist Liban Saney  
Group MGM  
Project Account Code DM7300  
c13acq\_512.crl CDCl3 {C:\NMR} mgmgrp 59

$^{13}\text{C}$  NMR (101 MHz  $\text{CDCl}_3$ )

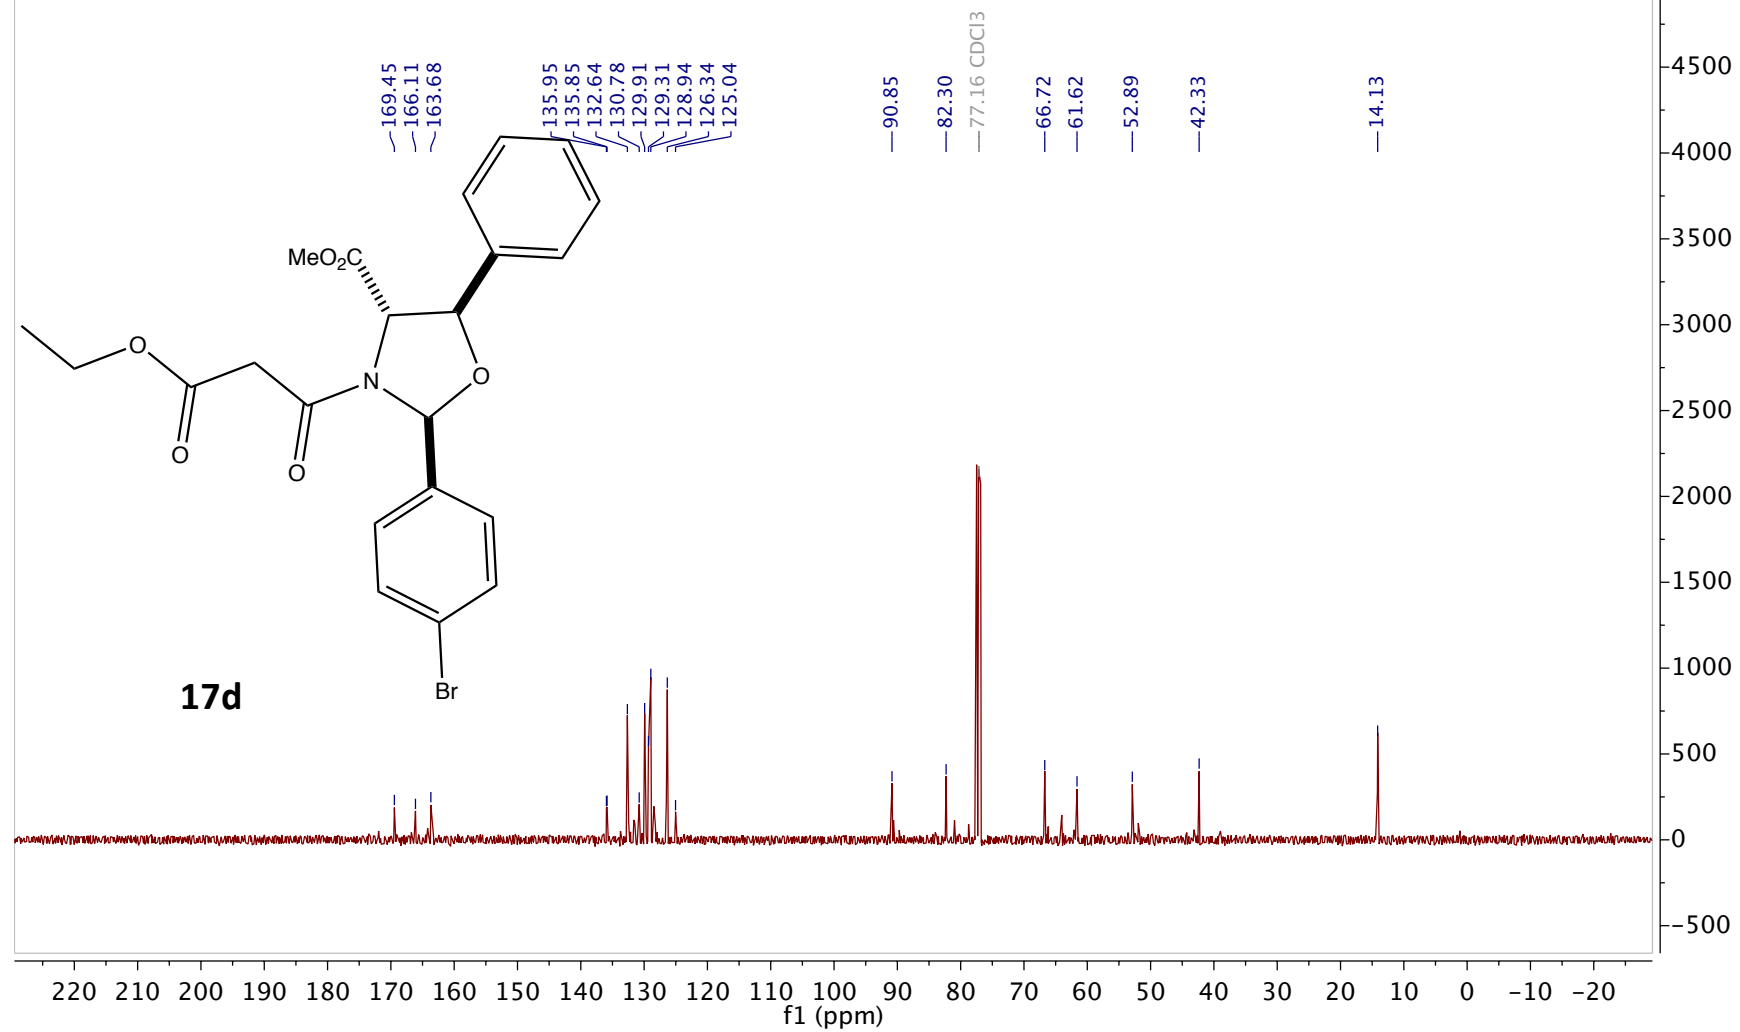

Apr08-2019-60-LS372(C).1.fid  
Instrument AVF400  
Chemist Liban Saney  
Group MGM  
Project Account Code DM7300  
h1acq.crl CDCl3 {C:\NMR} mgmgrp 60

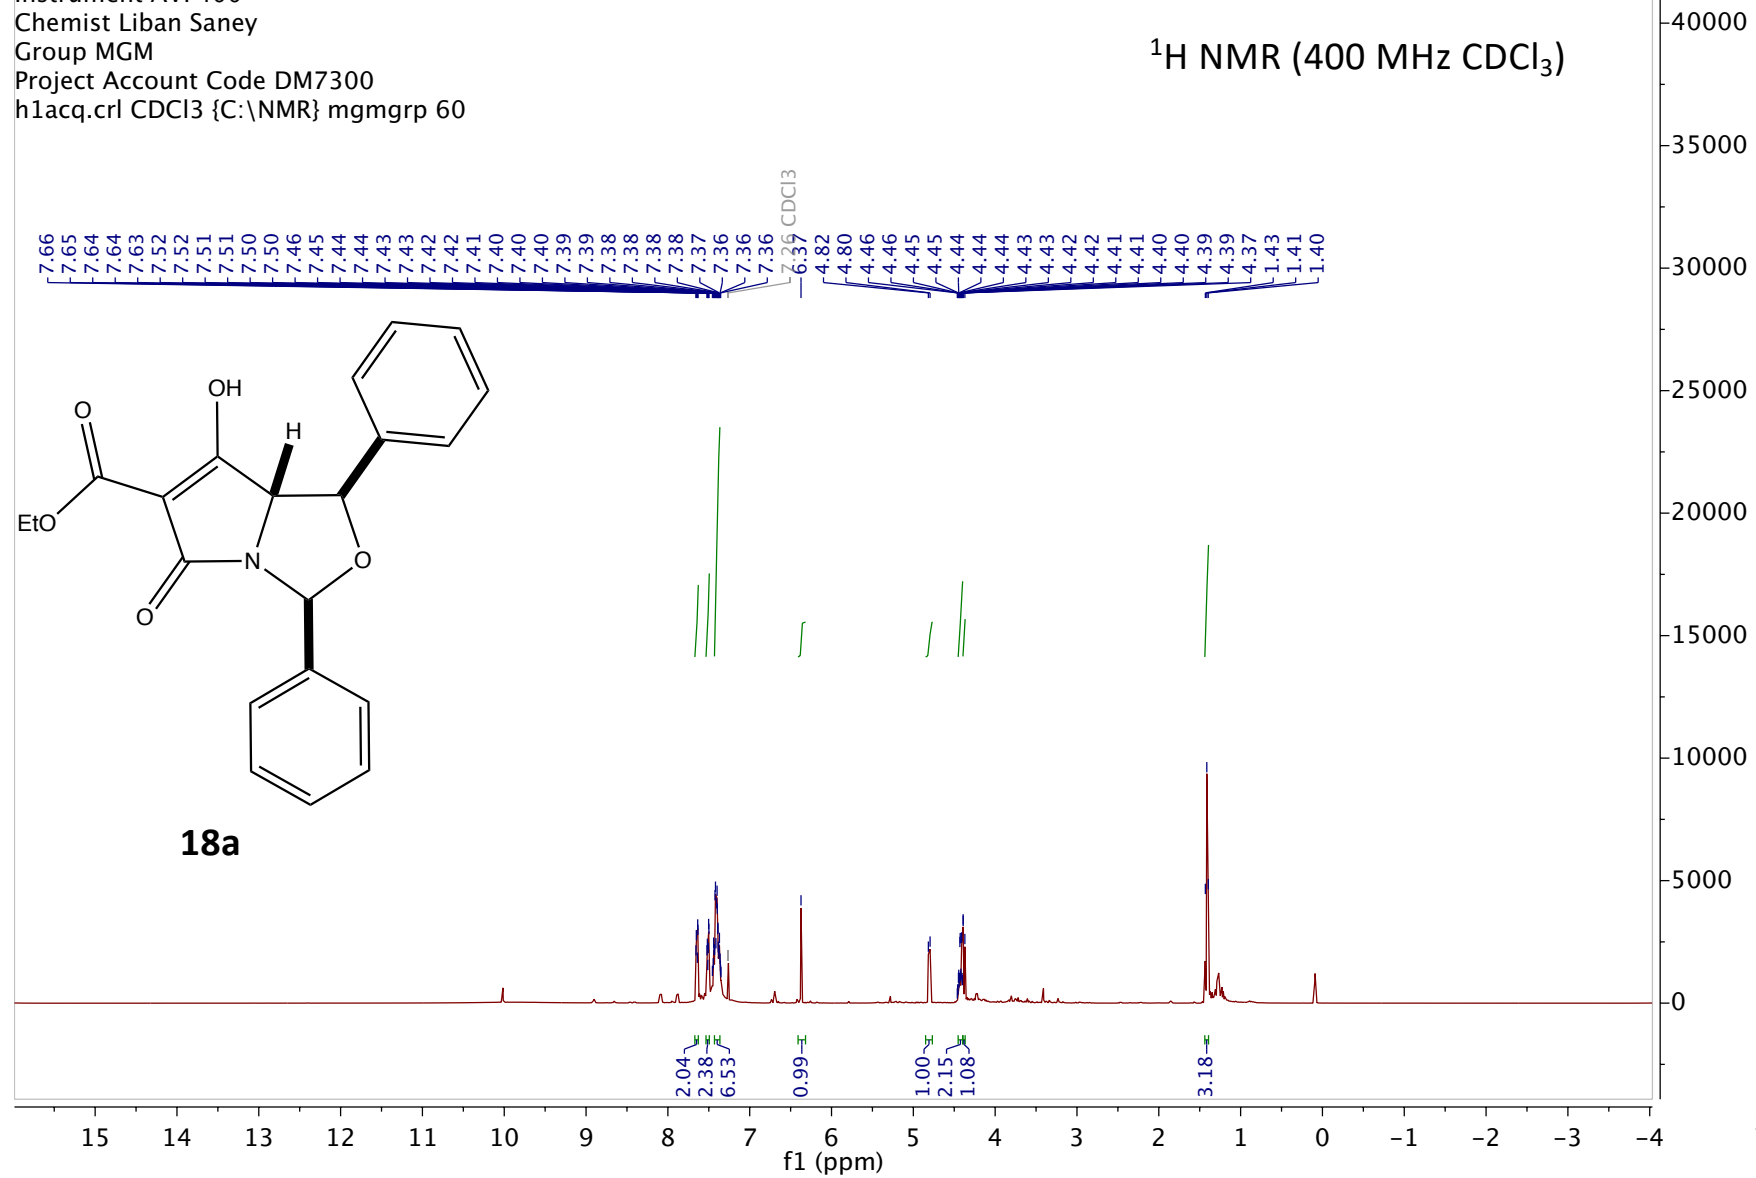

Apr08-2019-60-LS372(C).4.fid

Instrument AVF400

Chemist Liban Saney

Group MGM

Project Account Code DM7300

c13acq\_512.crl CDCl3 {C:\NMR} mgmgrp 60

<sup>13</sup>C NMR (101 MHz CDCl<sub>3</sub>)

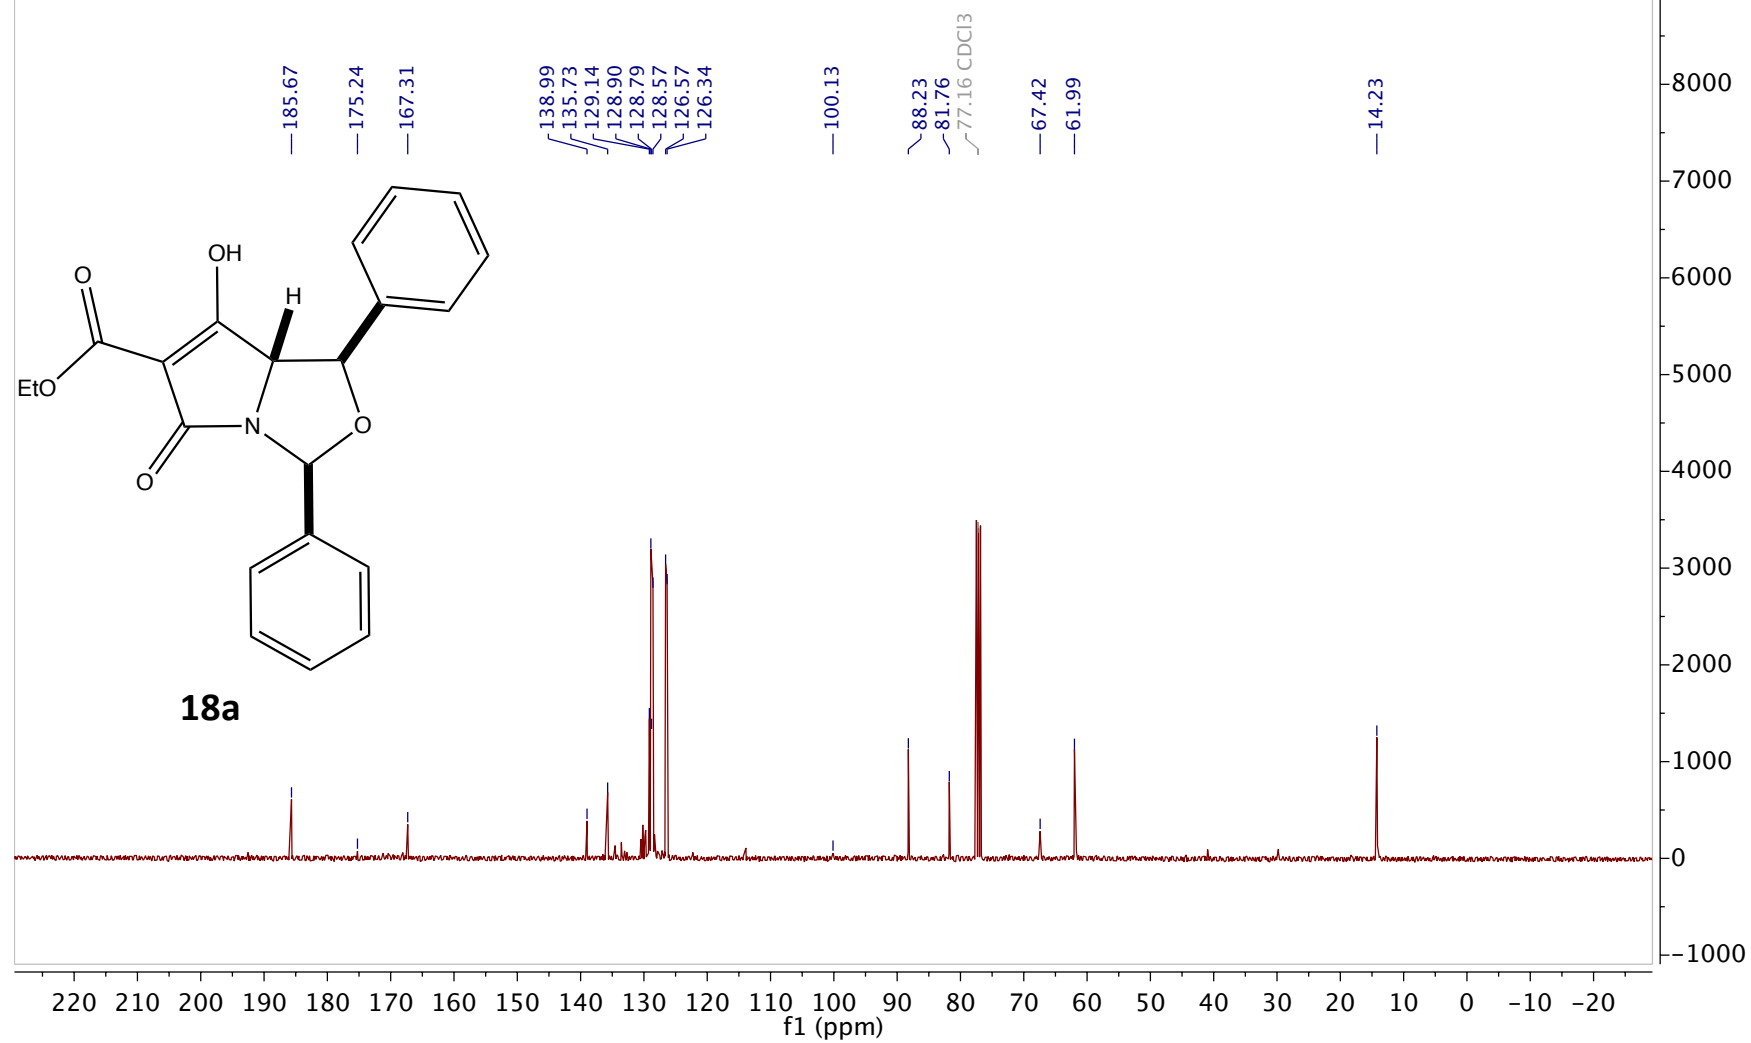

May05-2019-57-LS403(C).1.fid  
Instrument AVF400  
Chemist Liban Saney  
Group MGM  
Project Account Code DM7300  
h1acq.crl CDCl3 {C:\NMR} mgmgrp 57

<sup>1</sup>H NMR (400 MHz CDCl<sub>3</sub>)

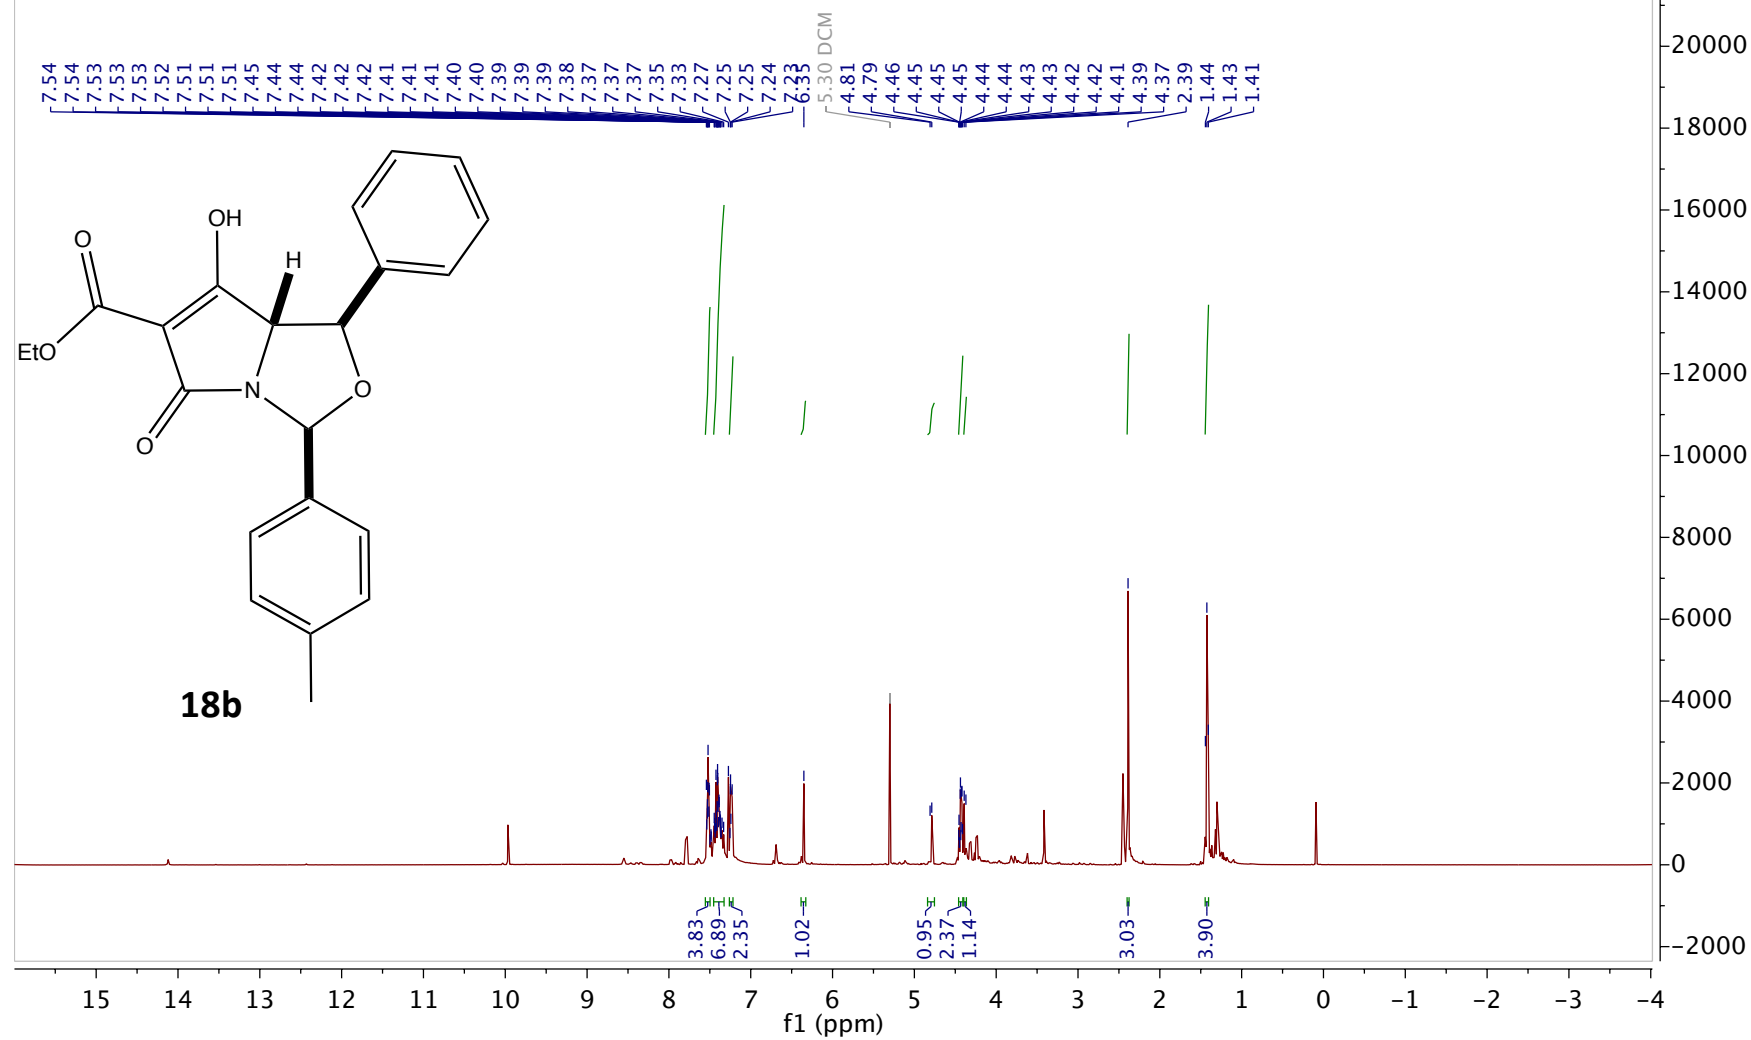

May05-2019-57-LS403(C).4.fid  
Instrument AVF400  
Chemist Liban Saney  
Group MGM  
Project Account Code DM7300  
c13acq\_512.crl CDCl3 {C:\NMR} mgmgrp 57

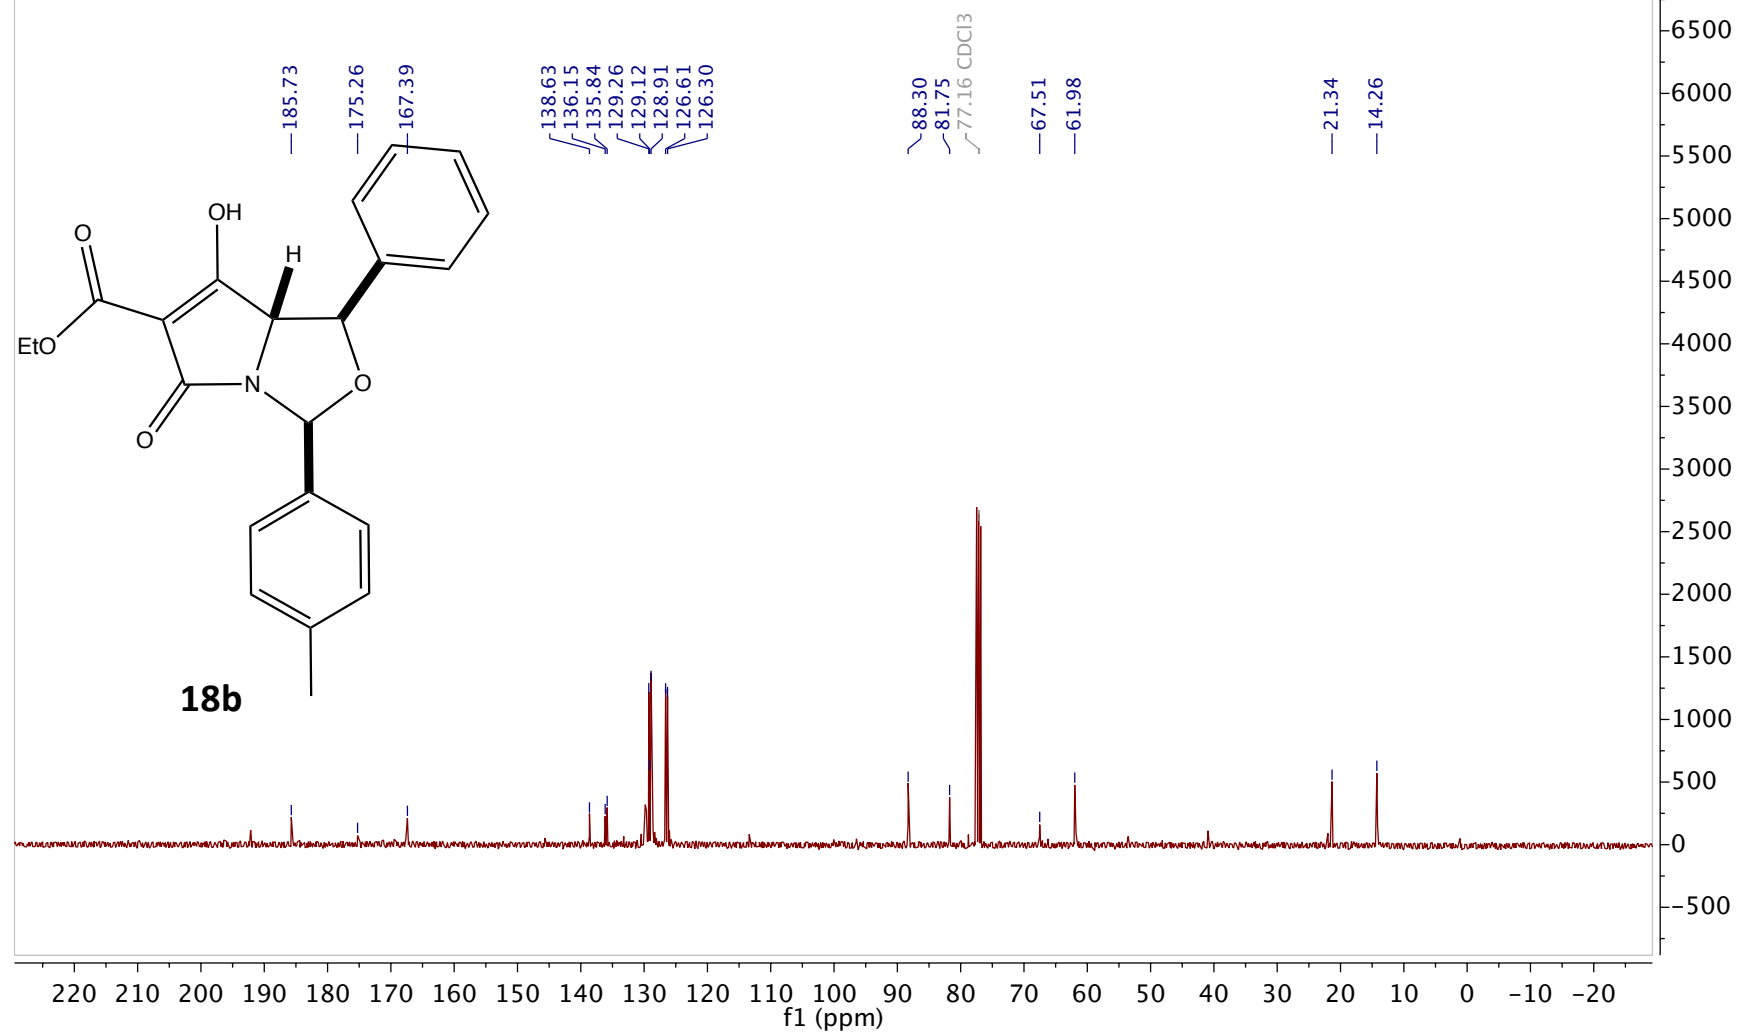

Dec10-2019-1-LS597(C).1.fid  
Instrument AVF400  
Chemist Liban Saney  
Group MGM  
Project Account Code DM7300  
h1acq.crl CDCl3 {C:\NMR} mgmgrp 1

<sup>1</sup>H NMR (400 MHz CDCl<sub>3</sub>)

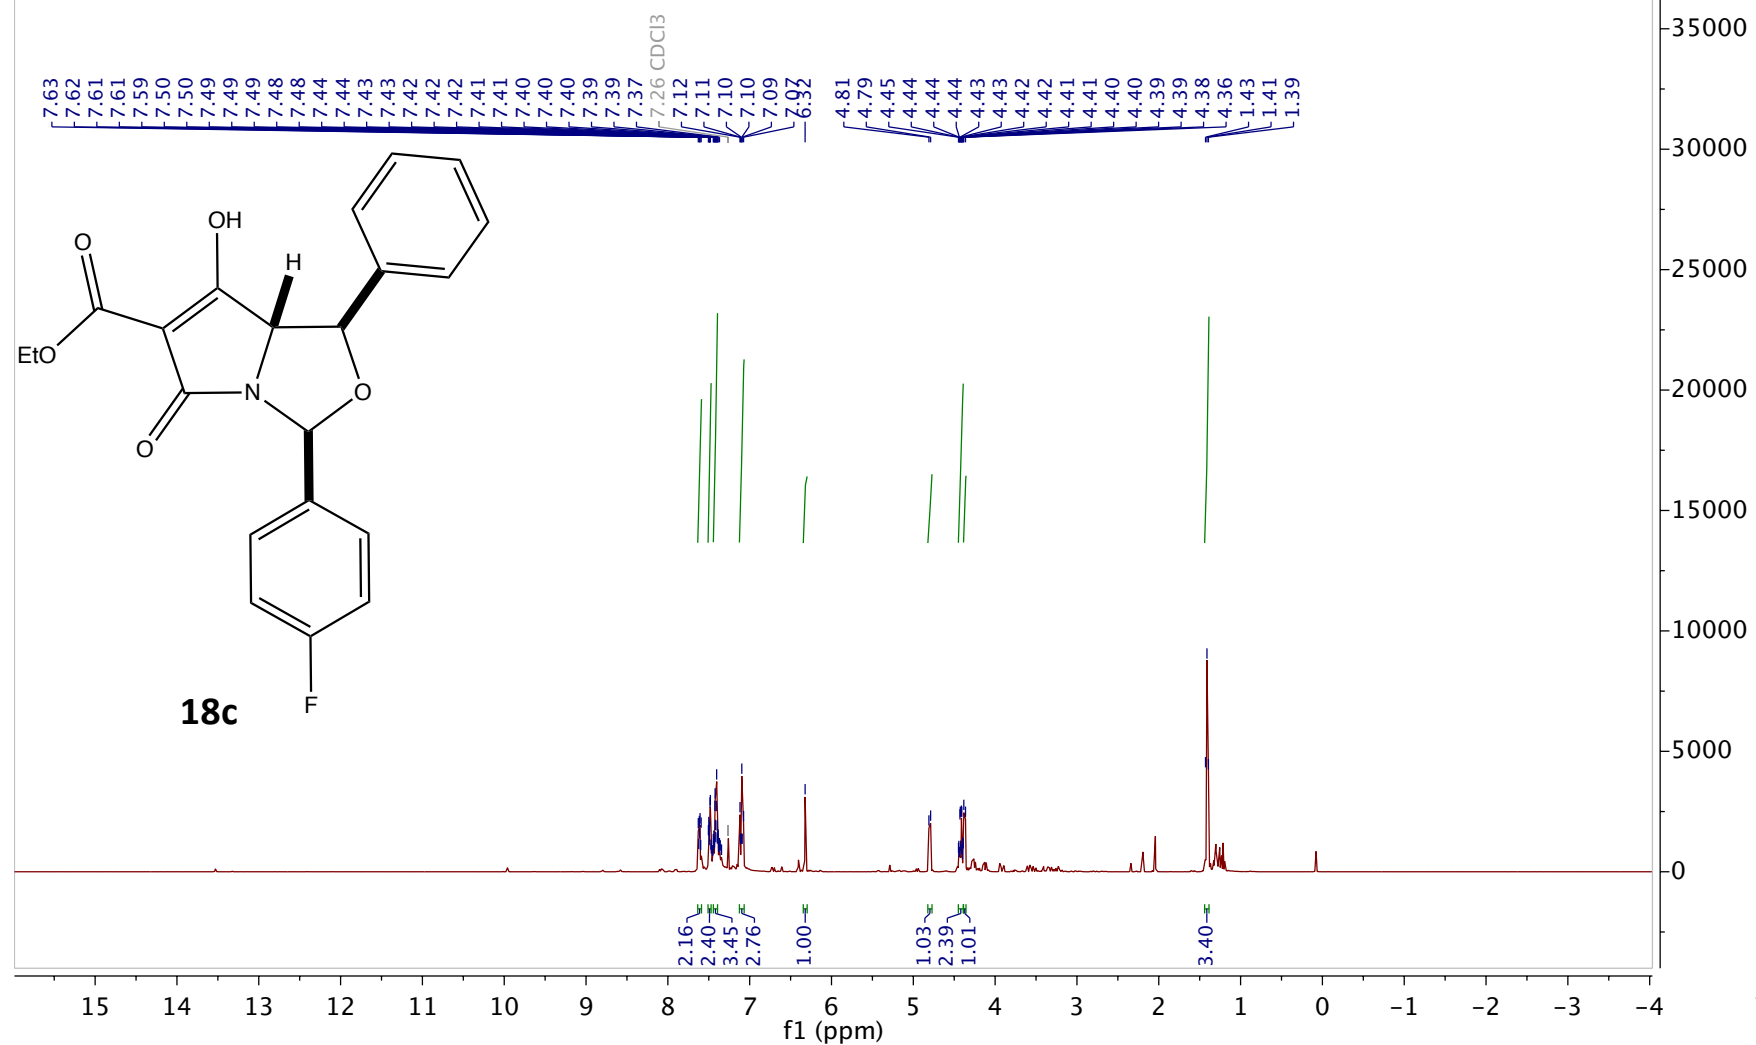

Dec10-2019-1-LS597(C).4.fid  
Instrument AVF400  
Chemist Liban Saney  
Group MGM  
Project Account Code DM7300  
c13acq\_512.crl CDCl3 {C:\NMR} mgmgrp 1

$^{13}\text{C}$  NMR (101 MHz  $\text{CDCl}_3$ )

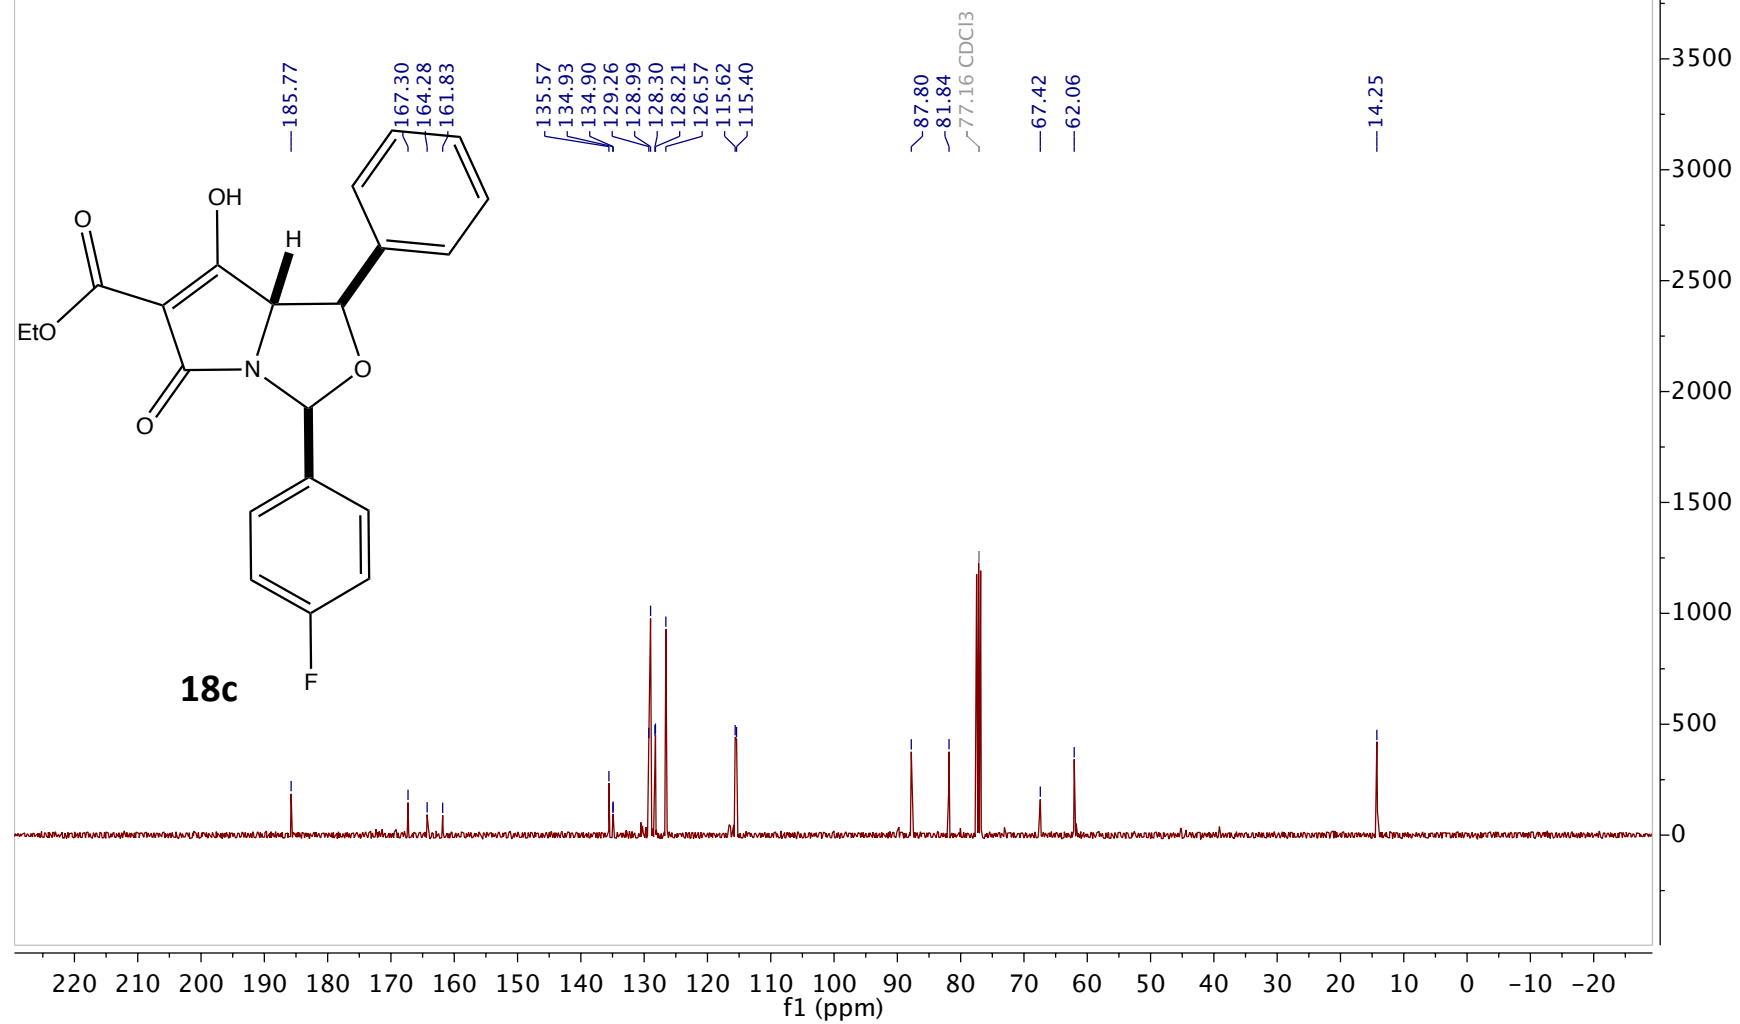



Dec10-2019-1-LS597(C).7.fid  
Instrument AVF400  
Chemist Liban Saney  
Group MGM  
Project Account Code DM7300  
f19dec\_256.crl CDCl3 {C:\NMR} mgmgrp 1

<sup>19</sup>F NMR (377 MHz CDCl<sub>3</sub>)

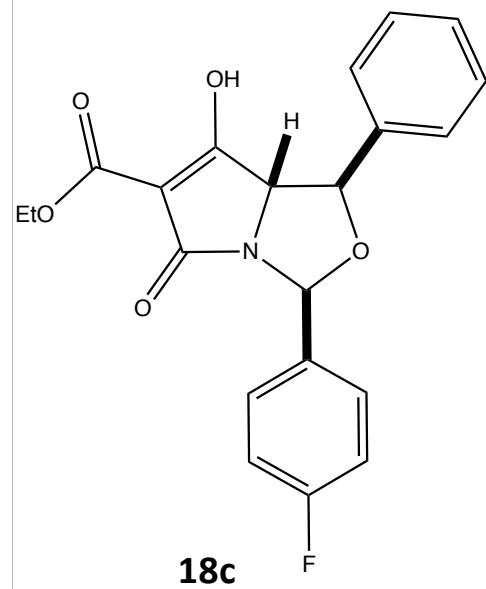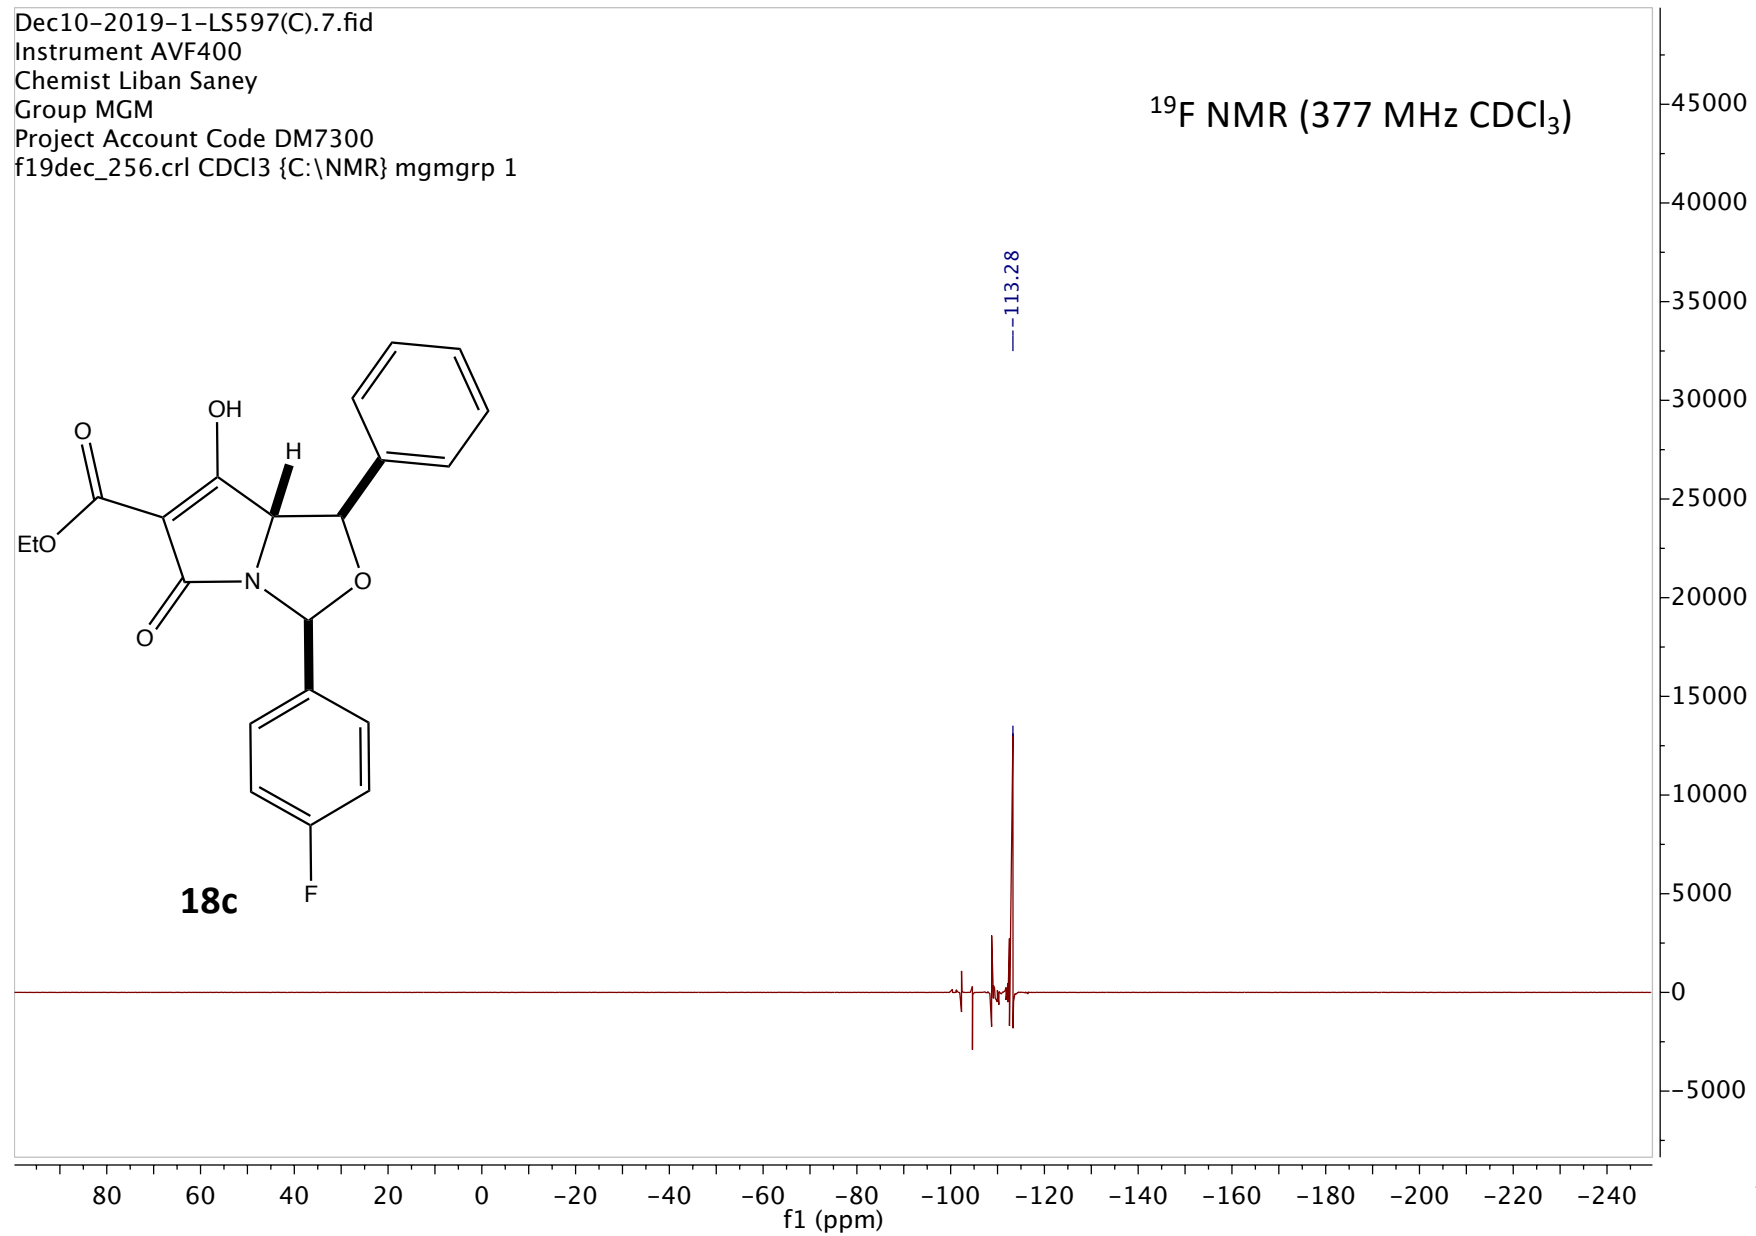

Apr15-2019-1-LS385(C).1.fid  
Instrument AVH400  
Chemist Liban Saney  
Group MGM  
Project Account Code DM7300  
h1acq.crl CDCl3 {C:\NMR} mgmgrp 1

$^1\text{H NMR}$  (400 MHz  $\text{CDCl}_3$ )

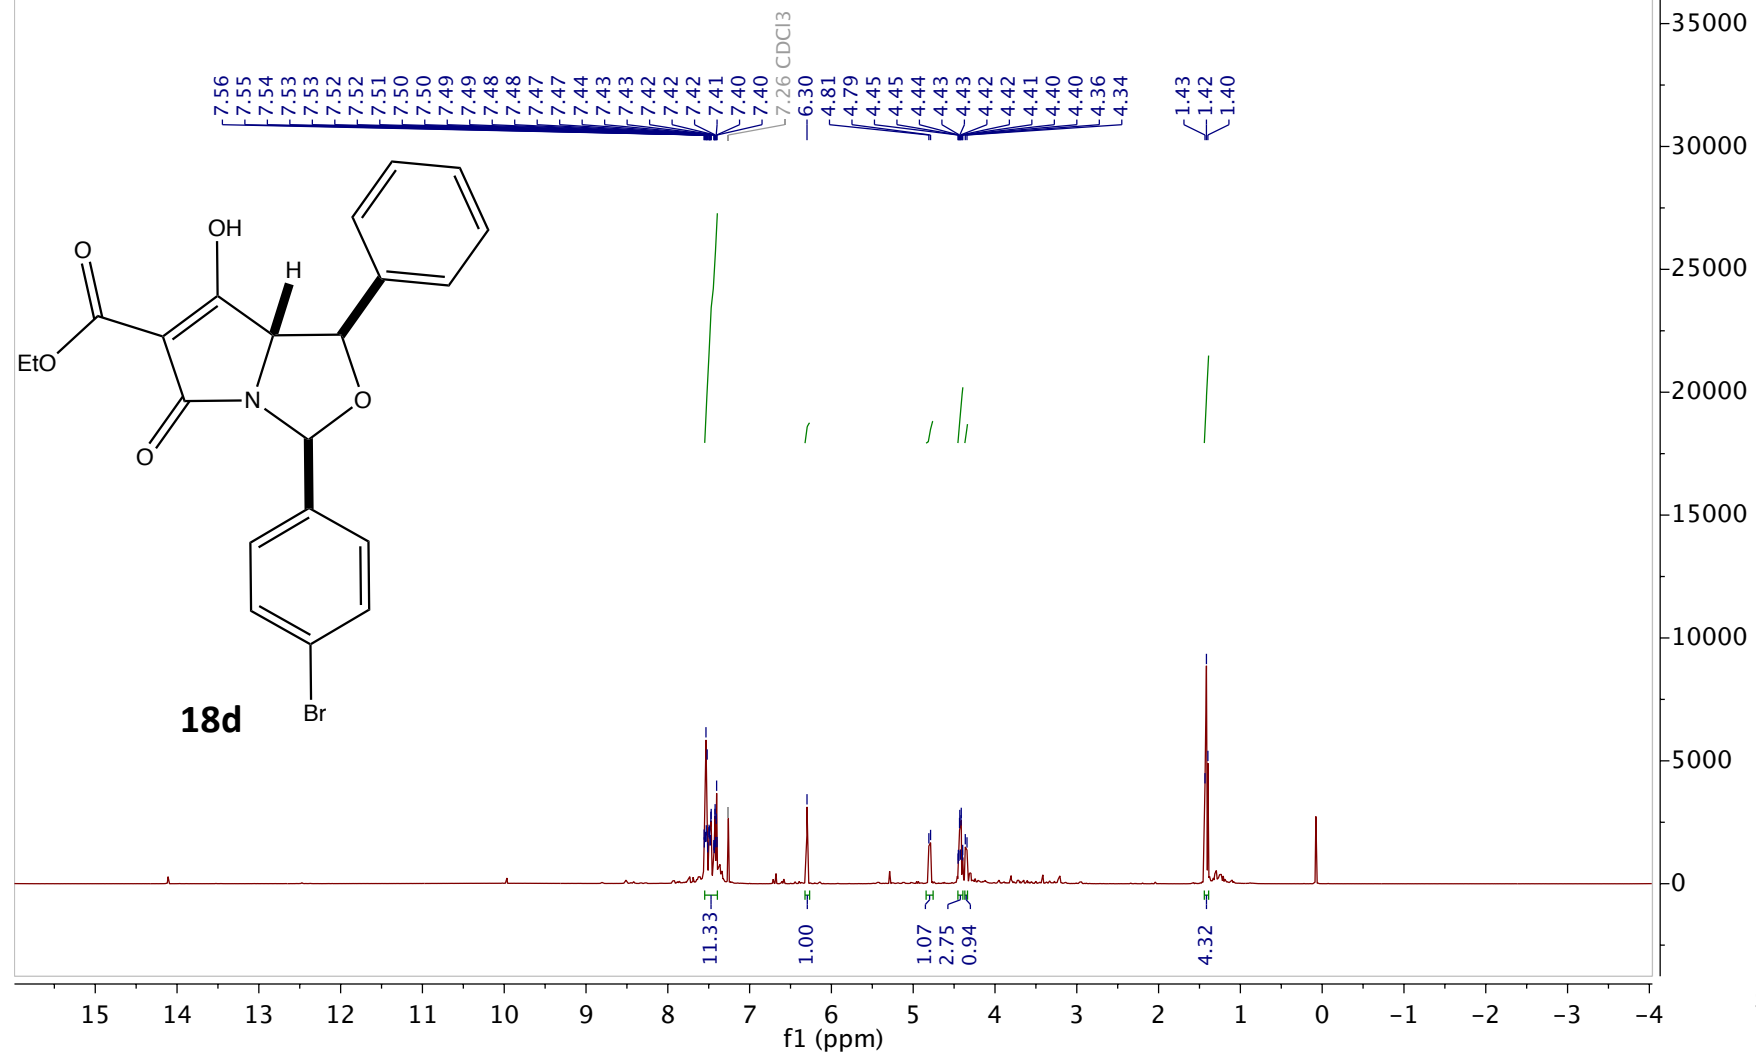

Apr15-2019-1-LS385(C).4.fid  
Instrument AVH400  
Chemist Liban Saney  
Group MGM  
Project Account Code DM7300  
c13acq\_512.crl CDCl3 {C:\NMR} mgmgrp 1

<sup>13</sup>C NMR (101 MHz CDCl<sub>3</sub>)

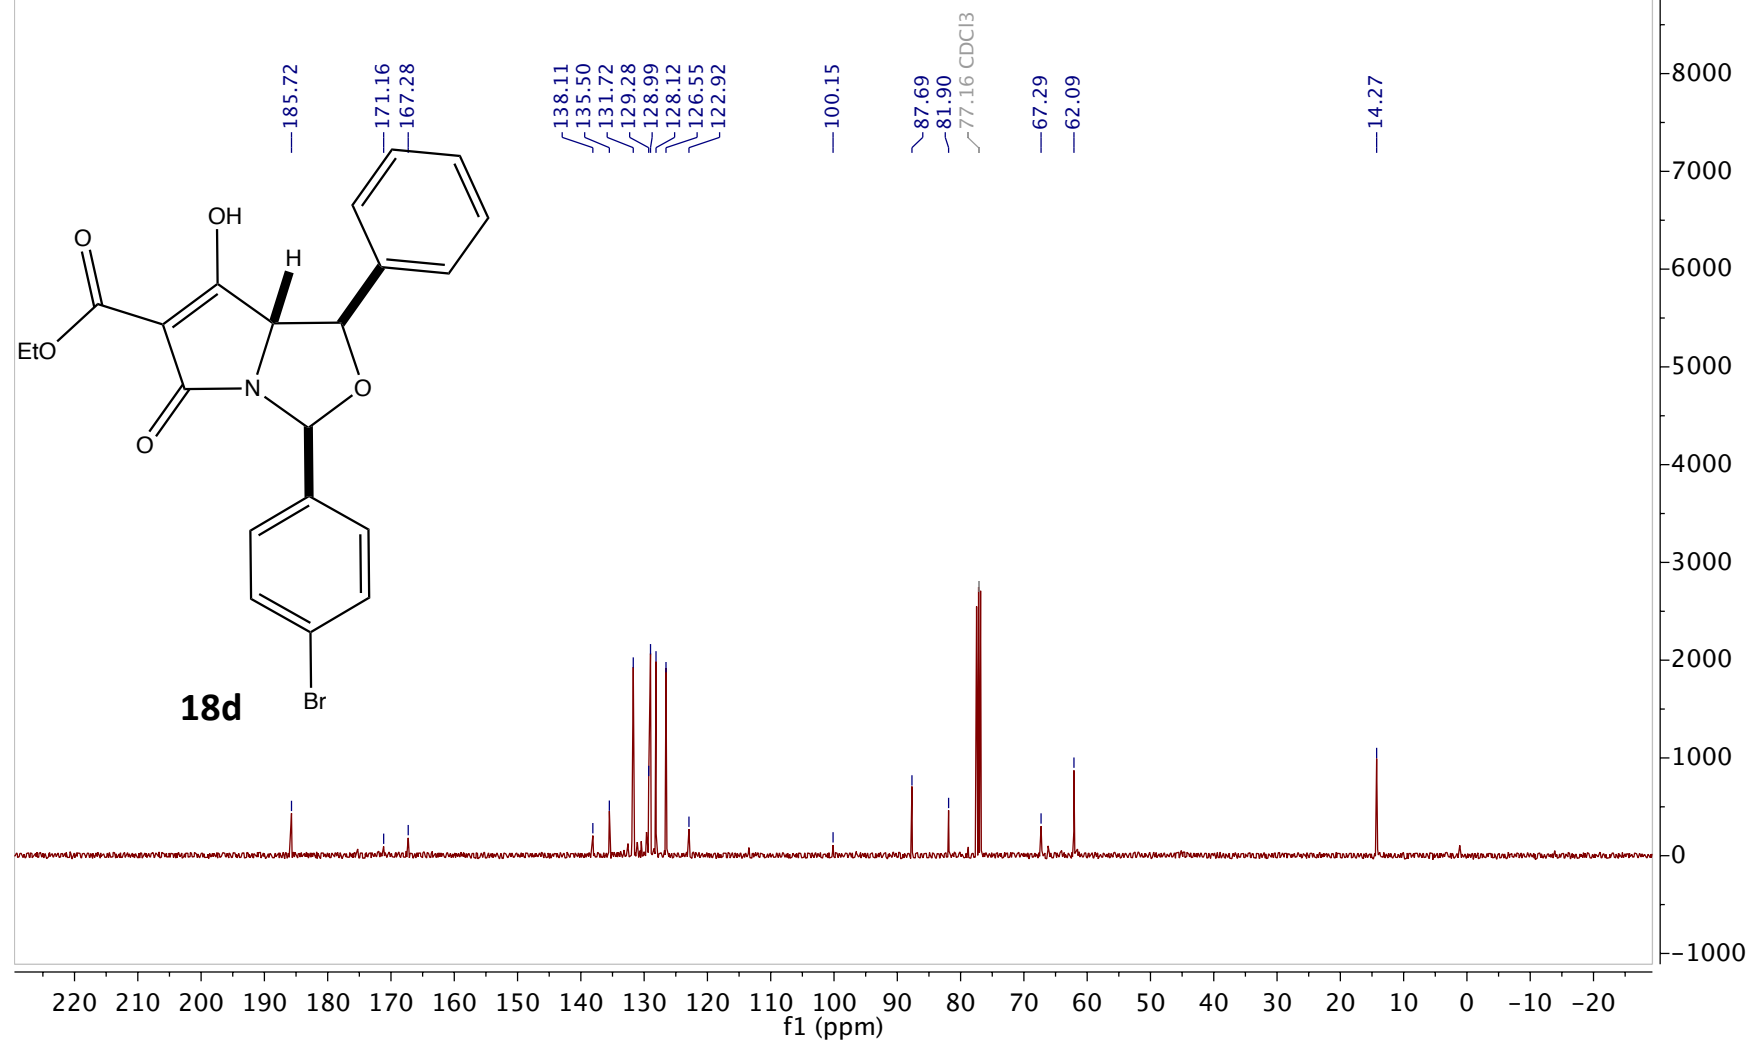

Jul16-2018-1-LS161(P) A10-B4 Fraction.1.fid  
Instrument AVF400  
Chemist Liban Saney  
Group MGM  
Project Account Code DM7300  
h1acq.crl CDCl3 {C:\NMR} mgmgrp 1

$^1\text{H}$  NMR (400 MHz  $\text{CDCl}_3$ )

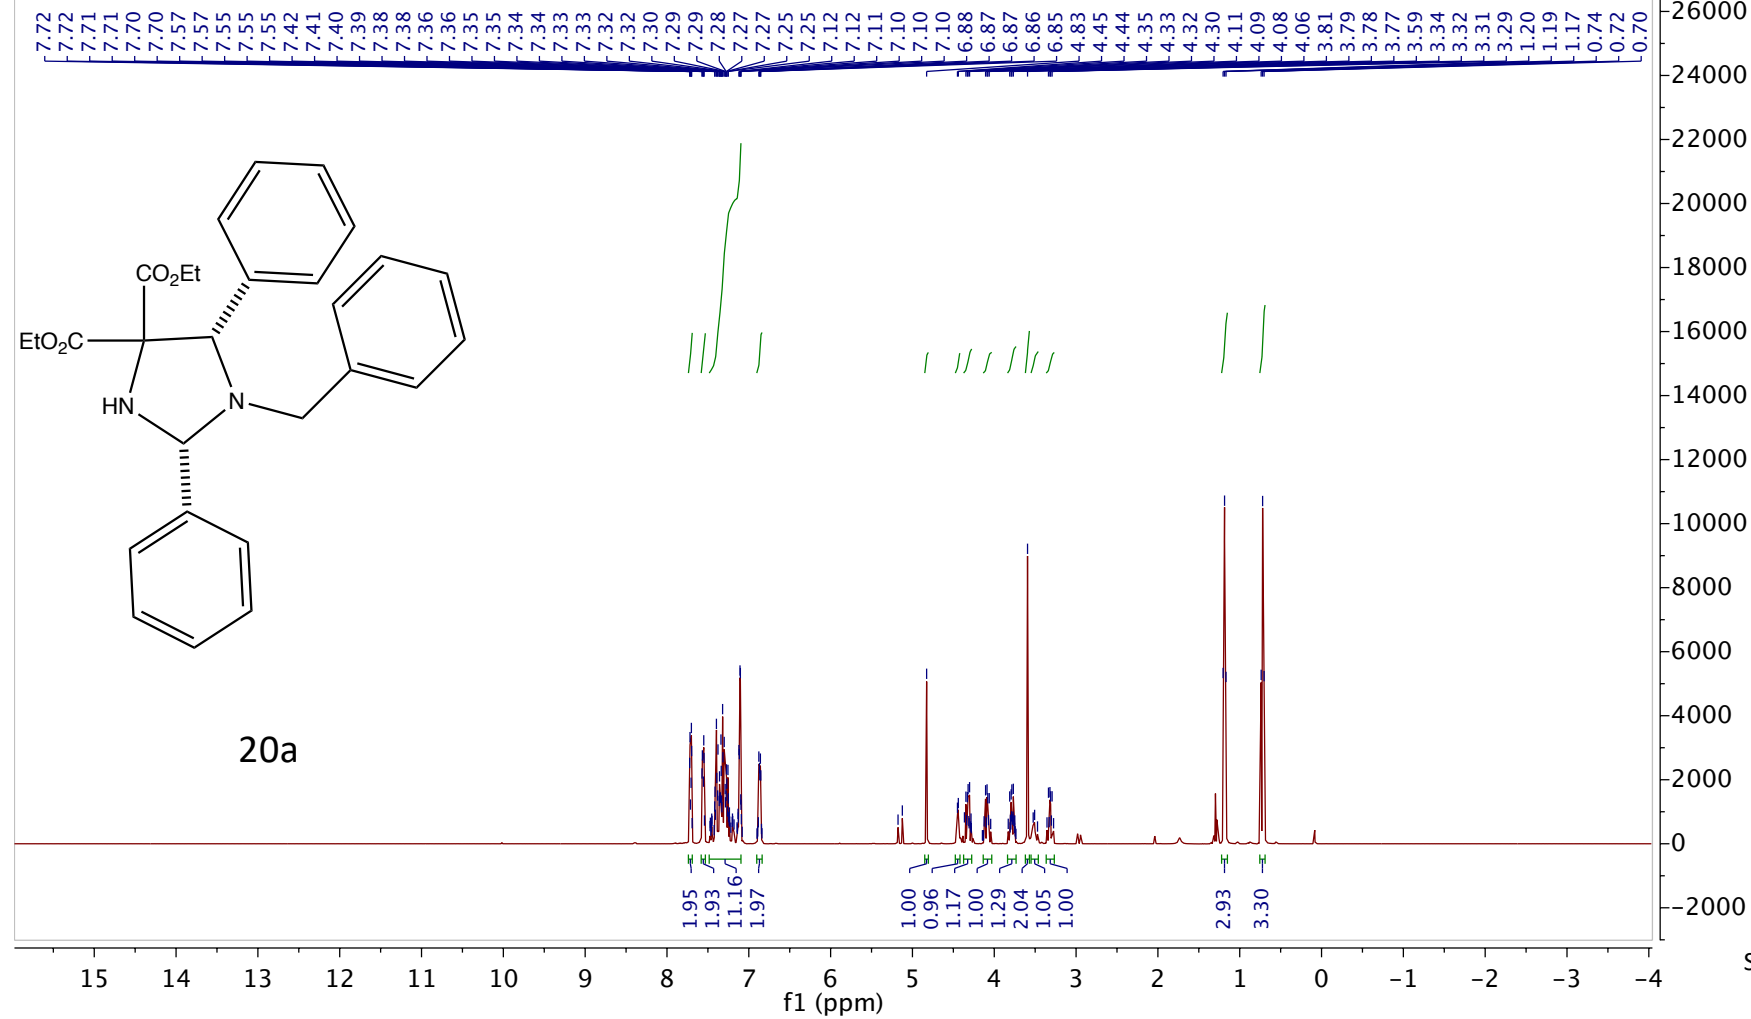

Jul16-2018-1-LS161(P) A10-B4 Fraction.4.fid  
Instrument AVF400  
Chemist Liban Saney  
Group MGM  
Project Account Code DM7300  
c13acq\_512.crl CDCl3 {C:\NMR} mgmgrp 1

<sup>13</sup>C NMR (101 MHz CDCl<sub>3</sub>)

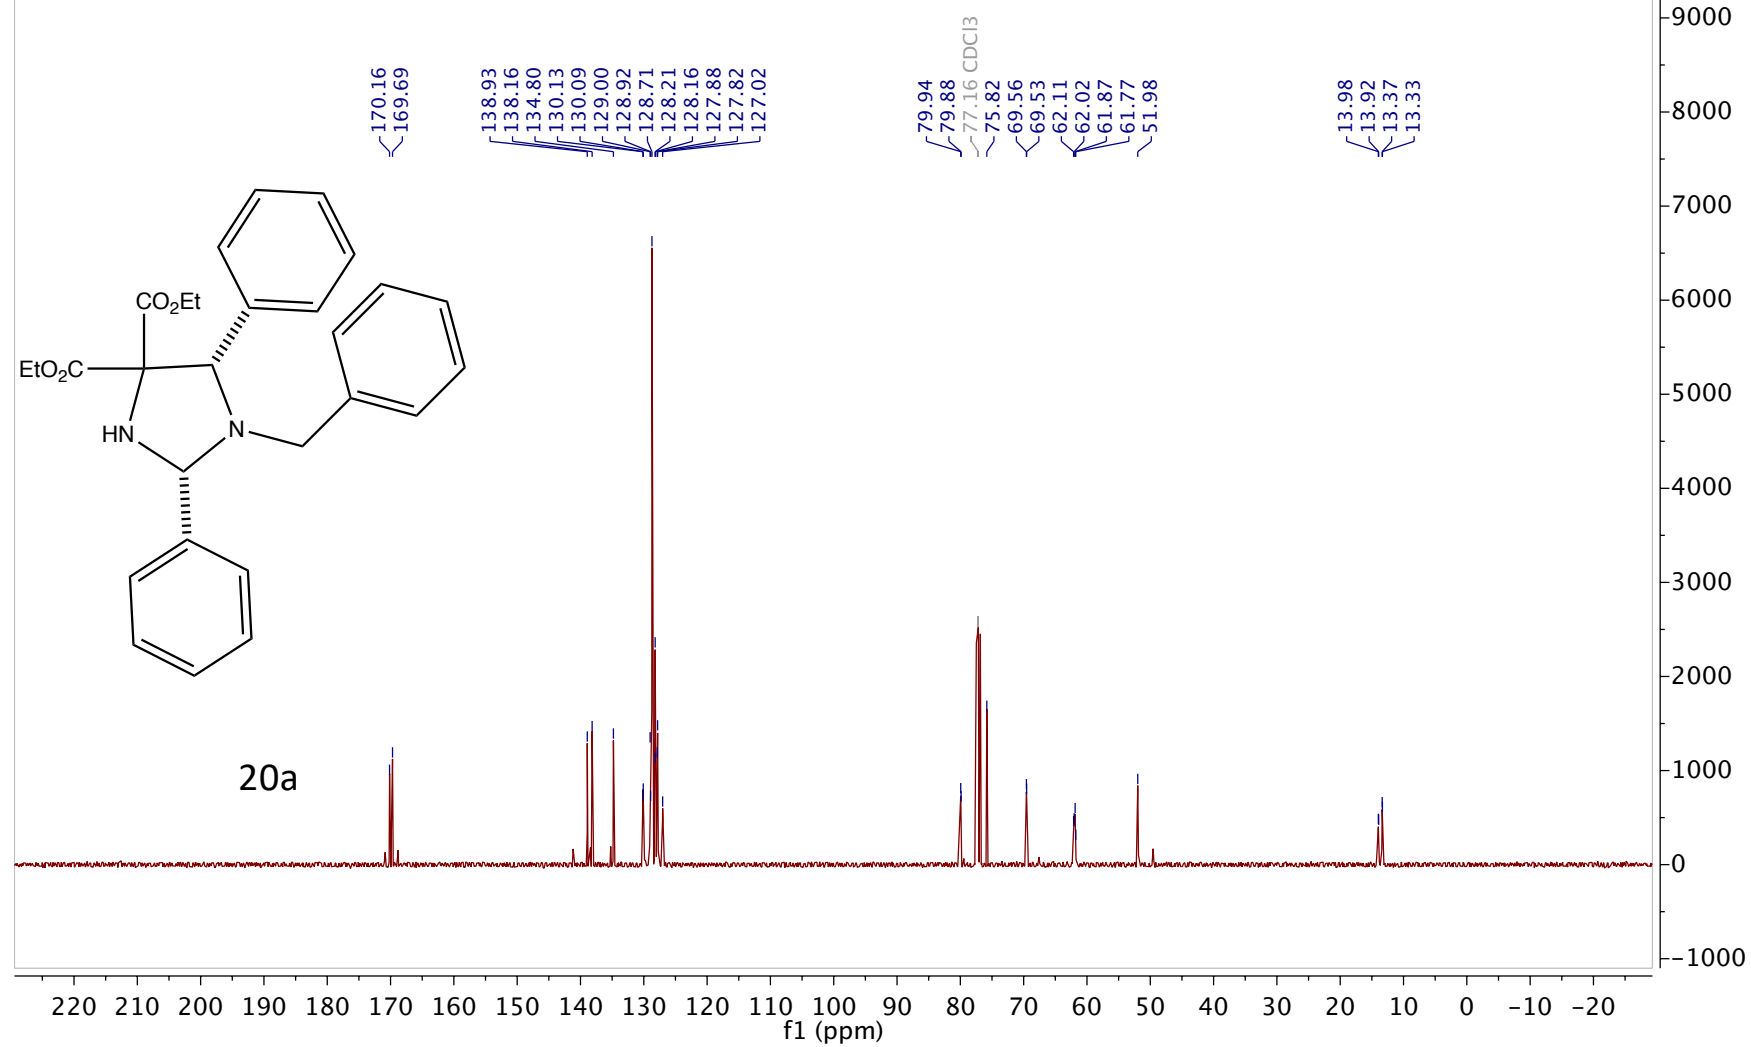

Nov12-2018-59-LS225(P) A11-B6 Fraction.1.fid  
Instrument AVF400  
Chemist Liban Saney  
Group MGM  
Project Account Code DM7300  
h1acq.crl CDCl3 {C:\NMR} mgmgrp 59

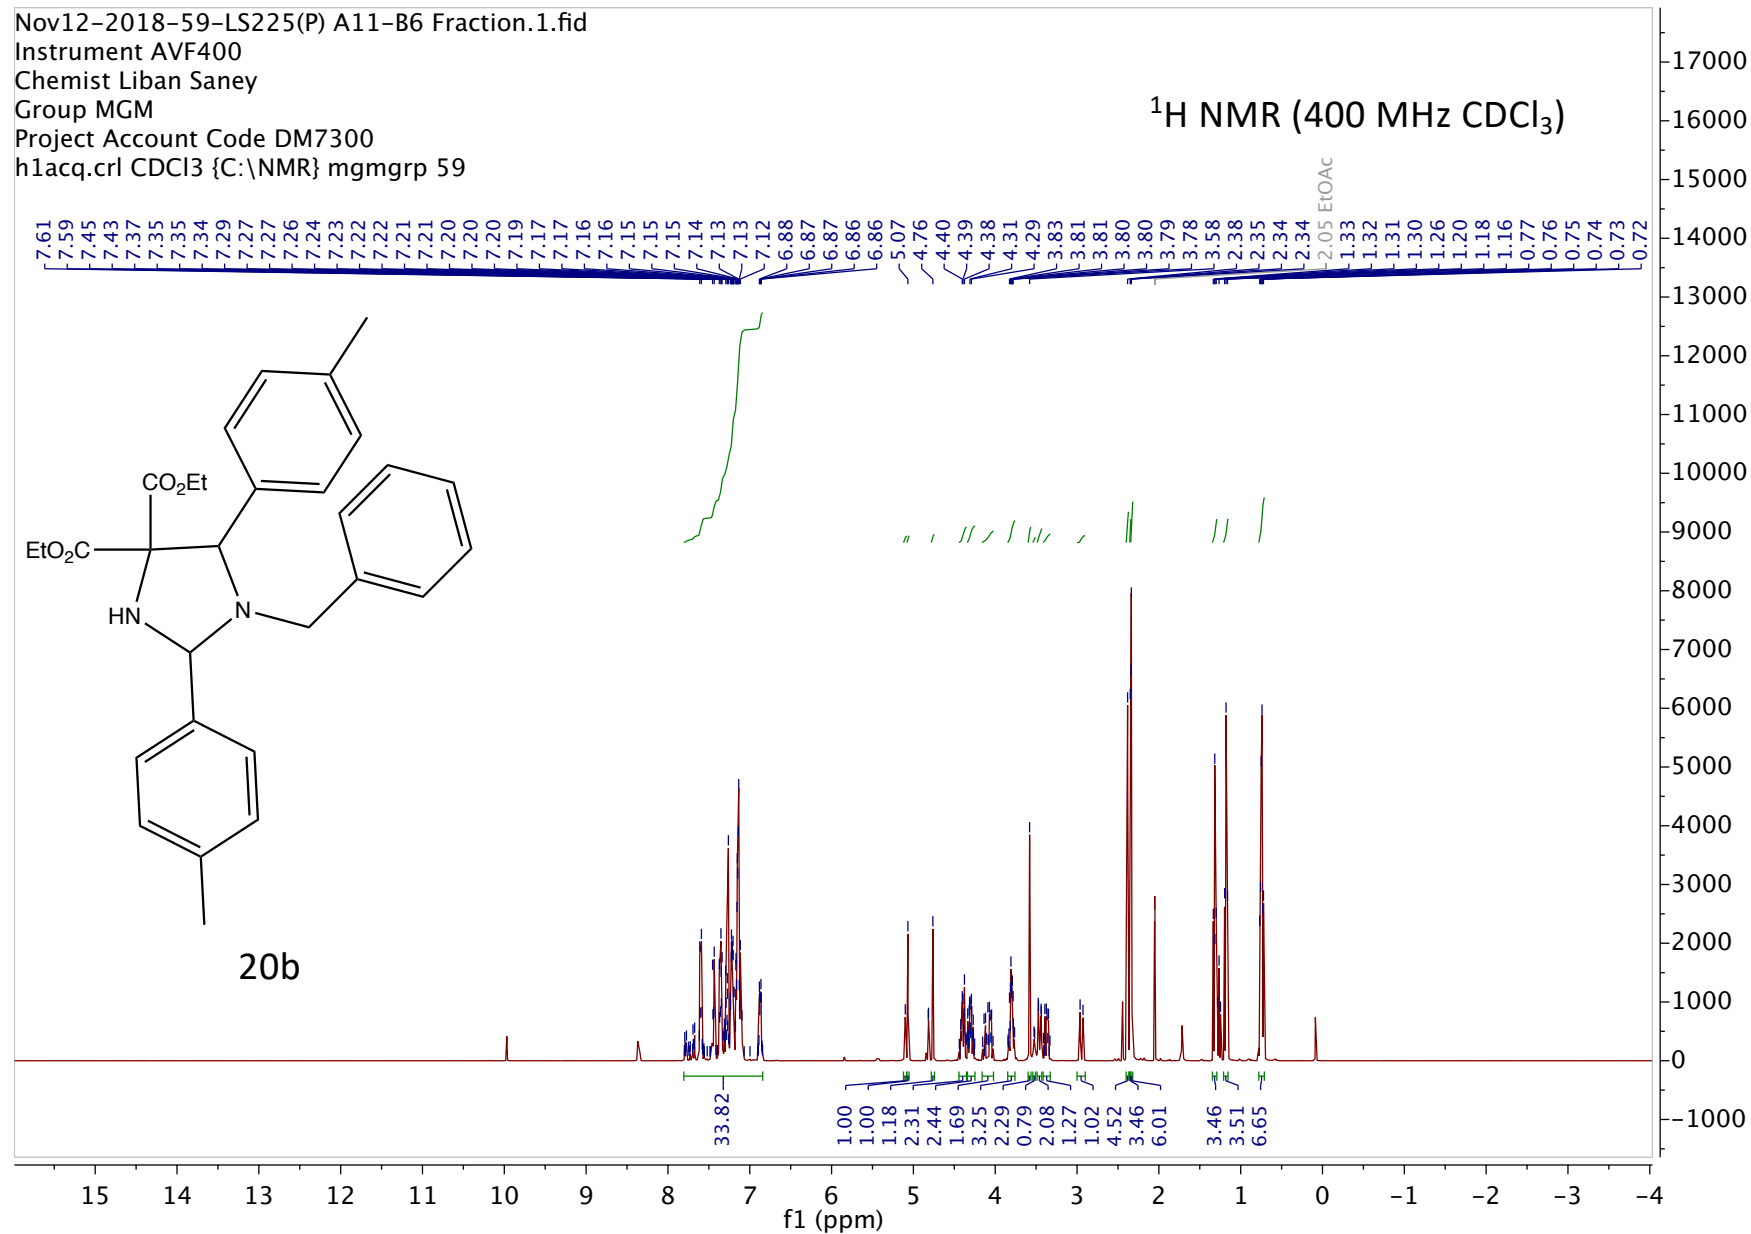

Nov12-2018-59-LS225(P) A11-B6 Fraction.4.fid  
Instrument AVF400  
Chemist Liban Saney  
Group MGM  
Project Account Code DM7300  
c13acq\_512.crl CDCl3 {C:\NMR} mgmgrp 59

<sup>13</sup>C NMR (101 MHz CDCl<sub>3</sub>)

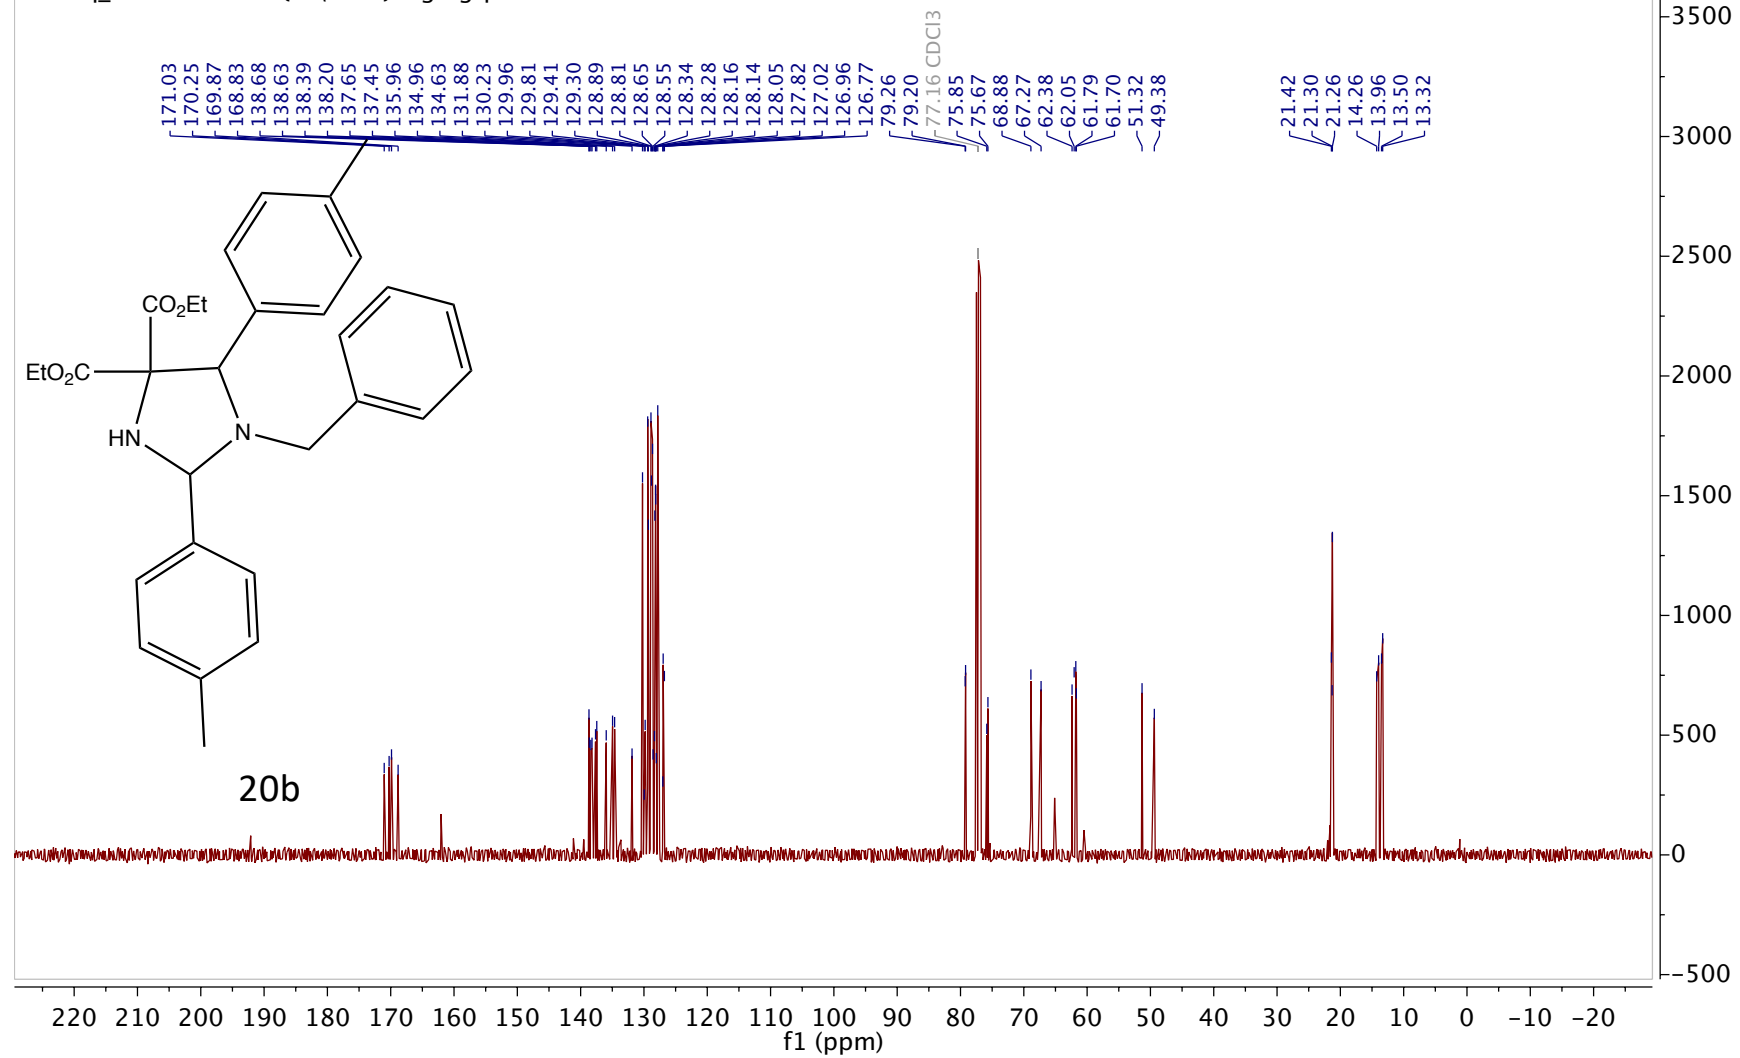

Aug20-2018-5-LS190(P) B4-B9 Fraction.1.fid  
Instrument AVF400  
Chemist Liban Saney  
Group MGM  
Project Account Code DM7300  
h1acq.crl CDCl3 {C:\NMR} mgmgrp 5

<sup>1</sup>H NMR (400 MHz CDCl<sub>3</sub>)

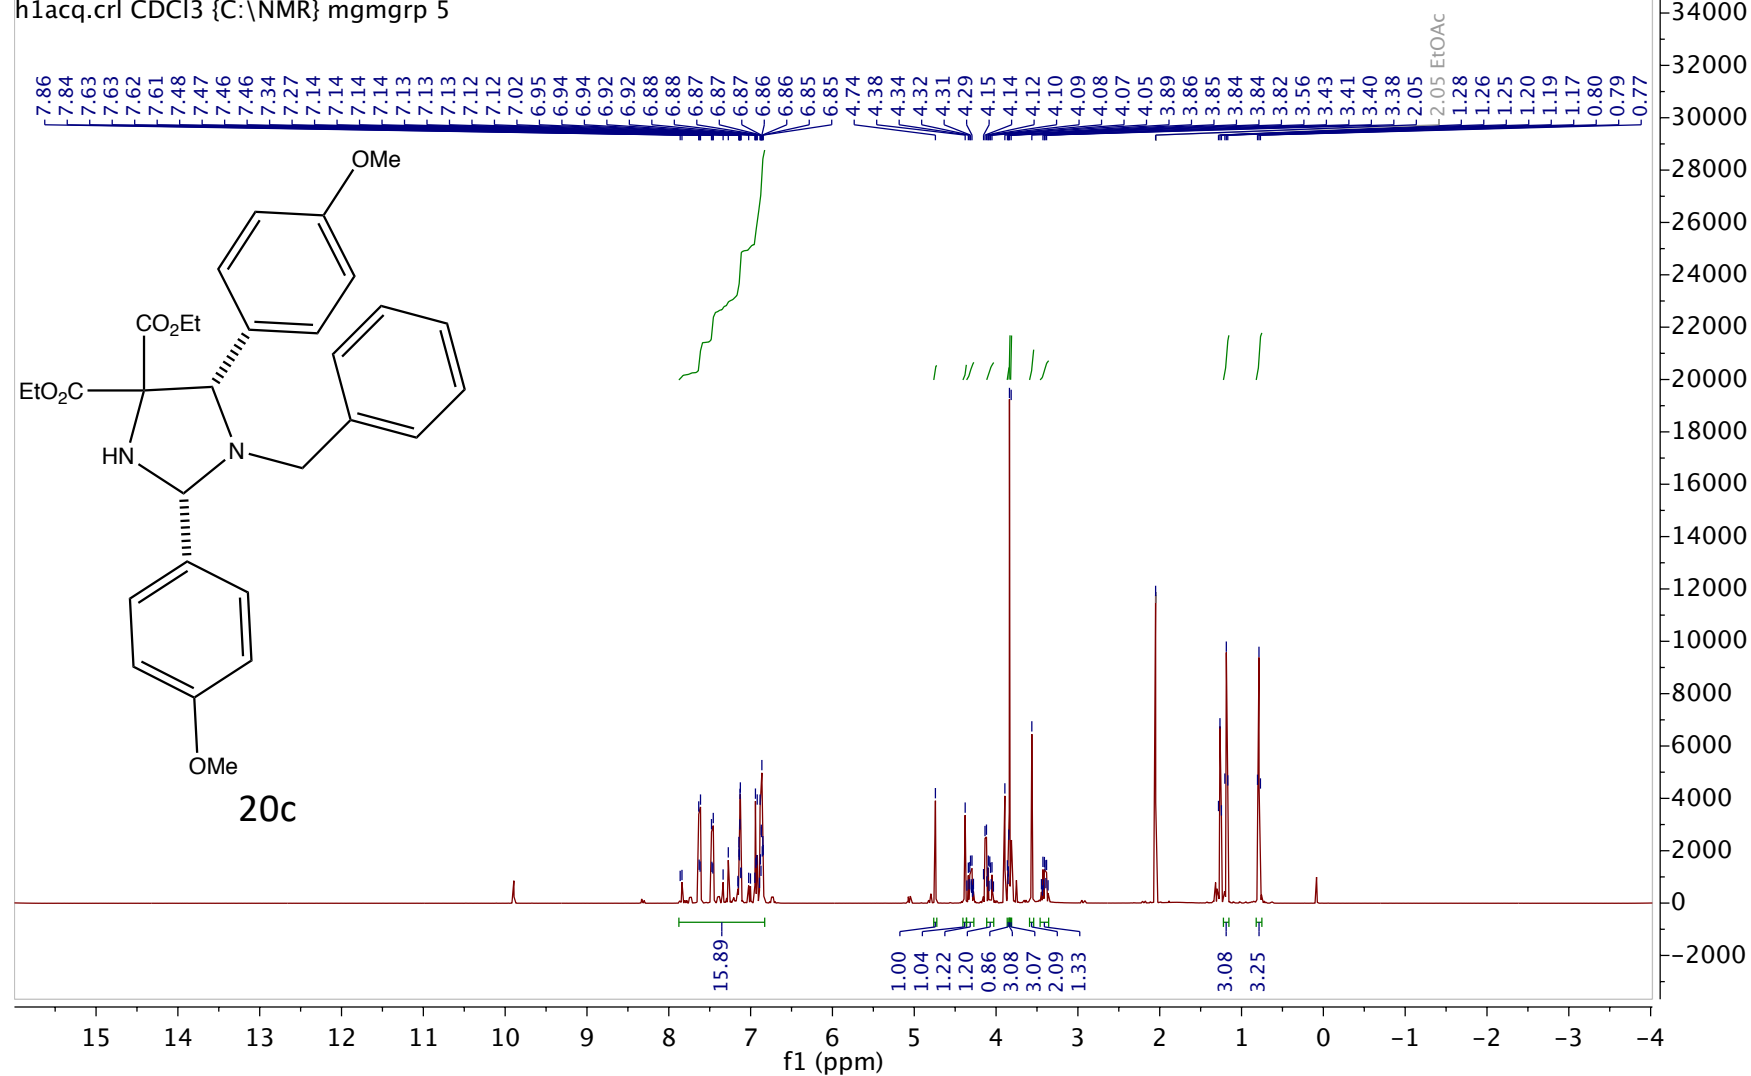



Aug20-2018-5-LS190(P) B4-B9 Fraction.4.fid  
Instrument AVF400  
Chemist Liban Saney  
Group MGM  
Project Account Code DM7300  
c13acq\_512.crl CDCl3 {C:\NMR} mgmgrp 5

<sup>13</sup>C NMR (101 MHz CDCl<sub>3</sub>)

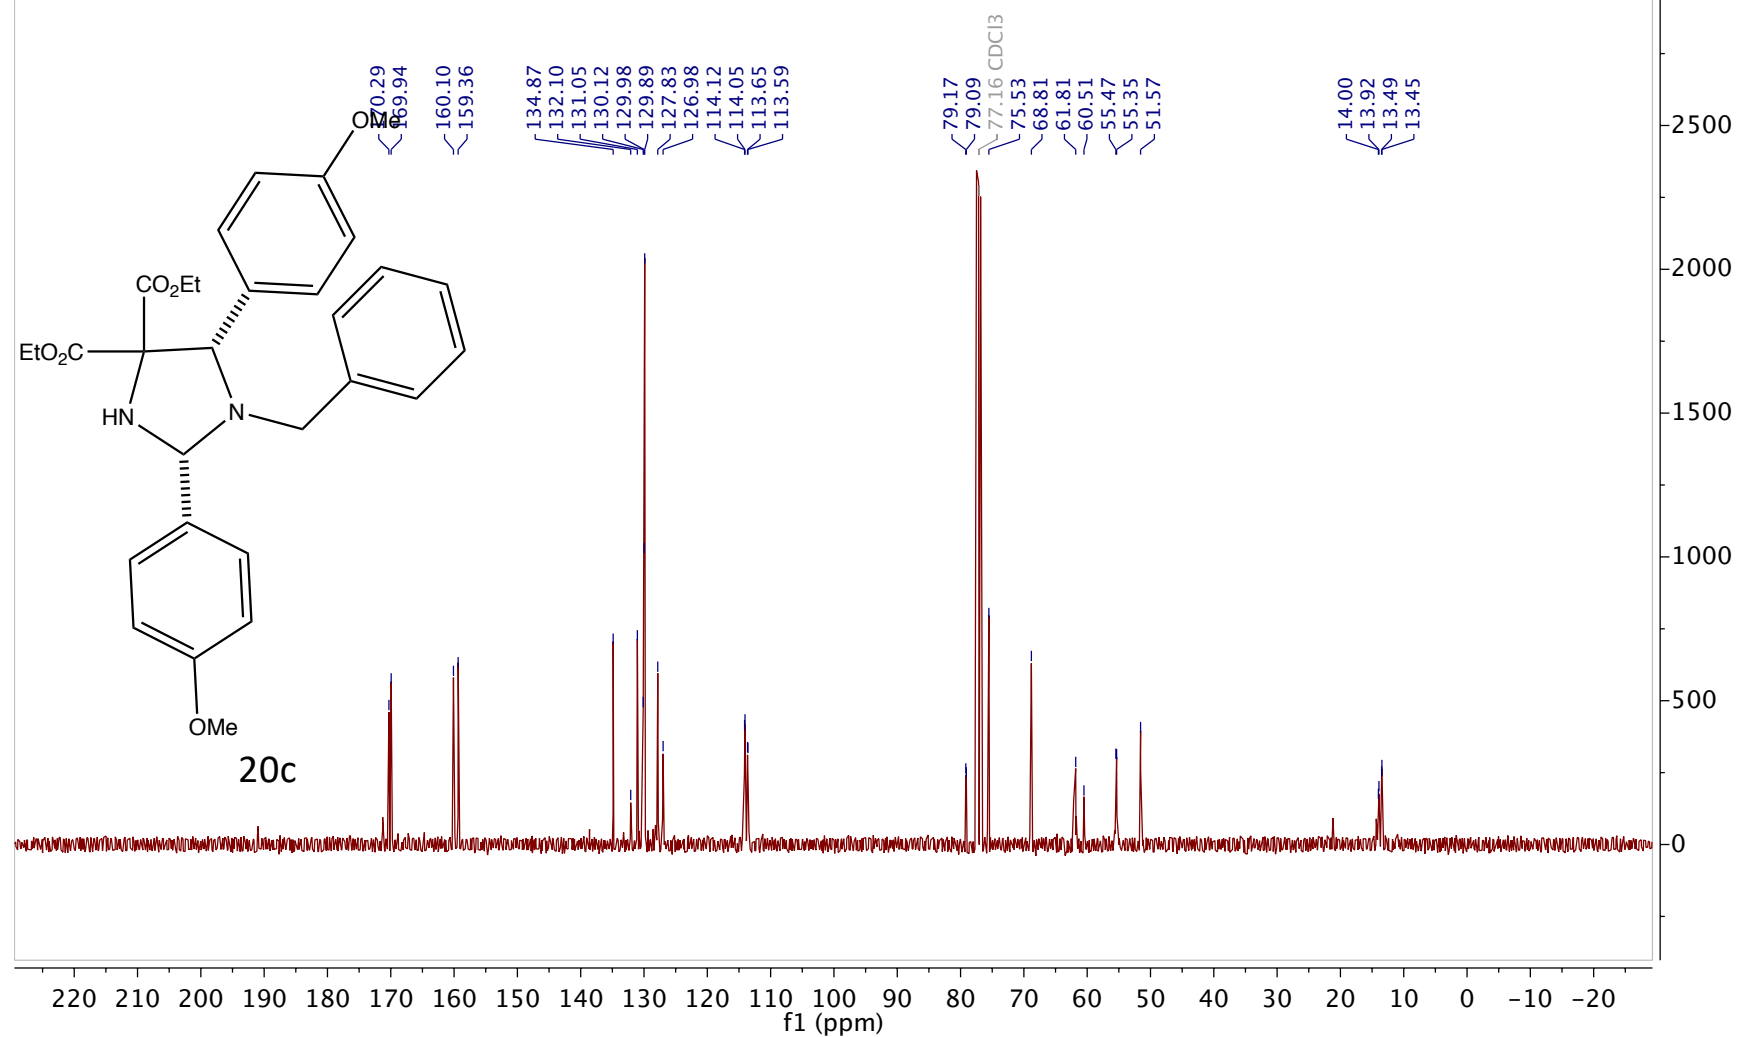

Mar26-2019-60-LS355(P) A5-A11.1.fid  
Instrument AVF400  
Chemist Liban Saney  
Group MGM  
Project Account Code DM7300  
h1acq.crl CDCl3 {C:\NMR} mgmgrp 60

<sup>1</sup>H NMR (400 MHz CDCl<sub>3</sub>)

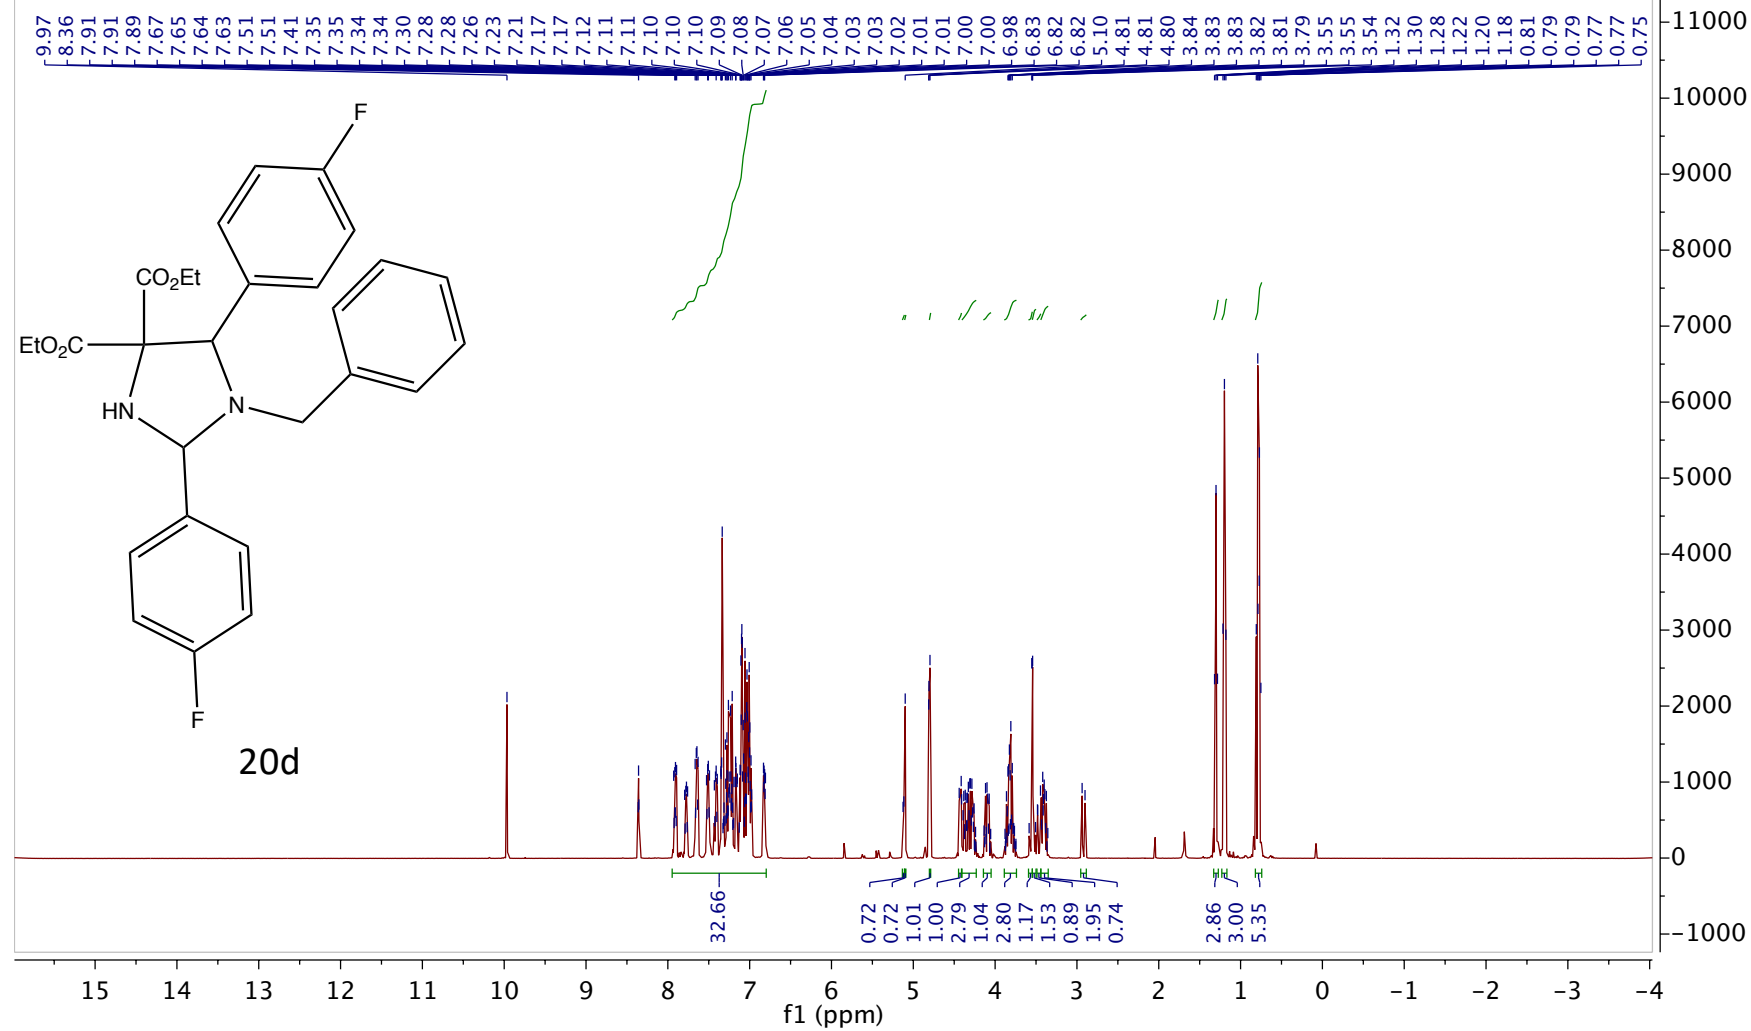

Mar26-2019-60-LS355(P) A5-A11.4.fid  
Instrument AVF400  
Chemist Liban Saney  
Group MGM  
Project Account Code DM7300  
c13acq\_512.crl CDCl3 {C:\NMR} mgmgrp 60

$^{13}\text{C}$  NMR (101 MHz  $\text{CDCl}_3$ )

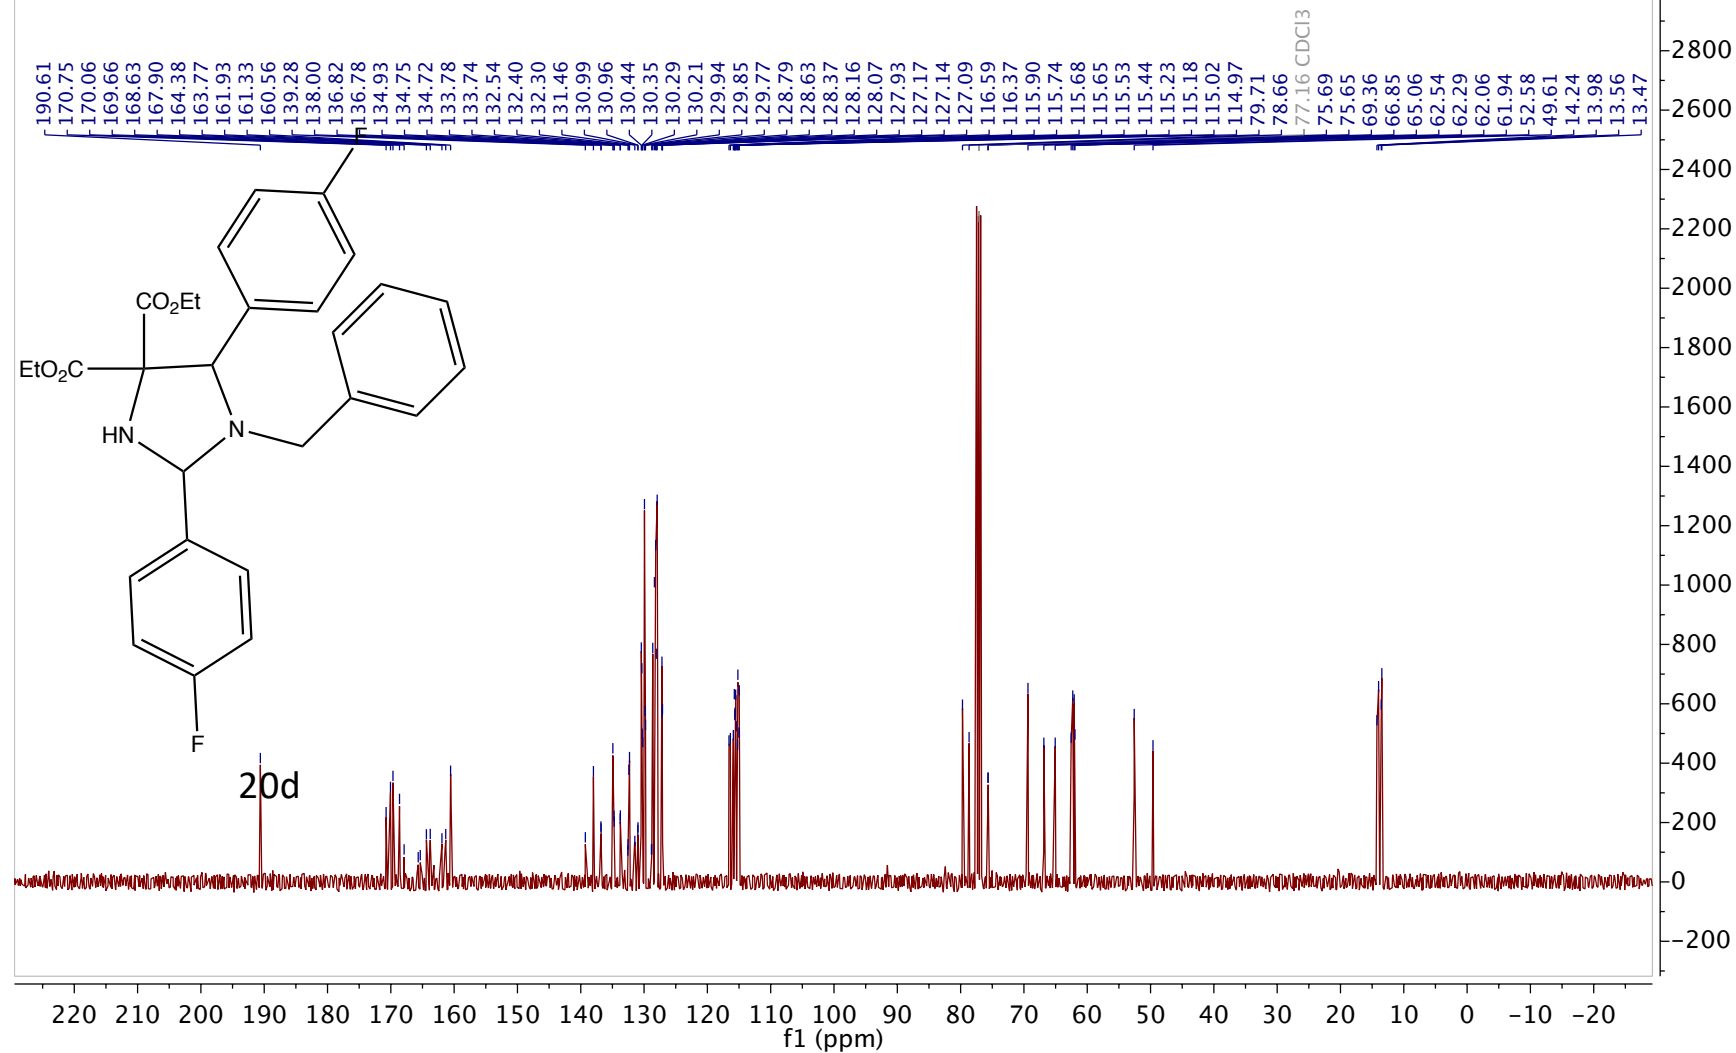

Jan09-2020-1-LS608(P) B7-C5.1.fid  
Instrument AVF400  
Chemist Liban Saney  
Group MGM  
Project Account Code DM7300  
h1acq.crl CDCl3 {C:\NMR} mgmgrp 1

<sup>1</sup>H NMR (400 MHz CDCl<sub>3</sub>)

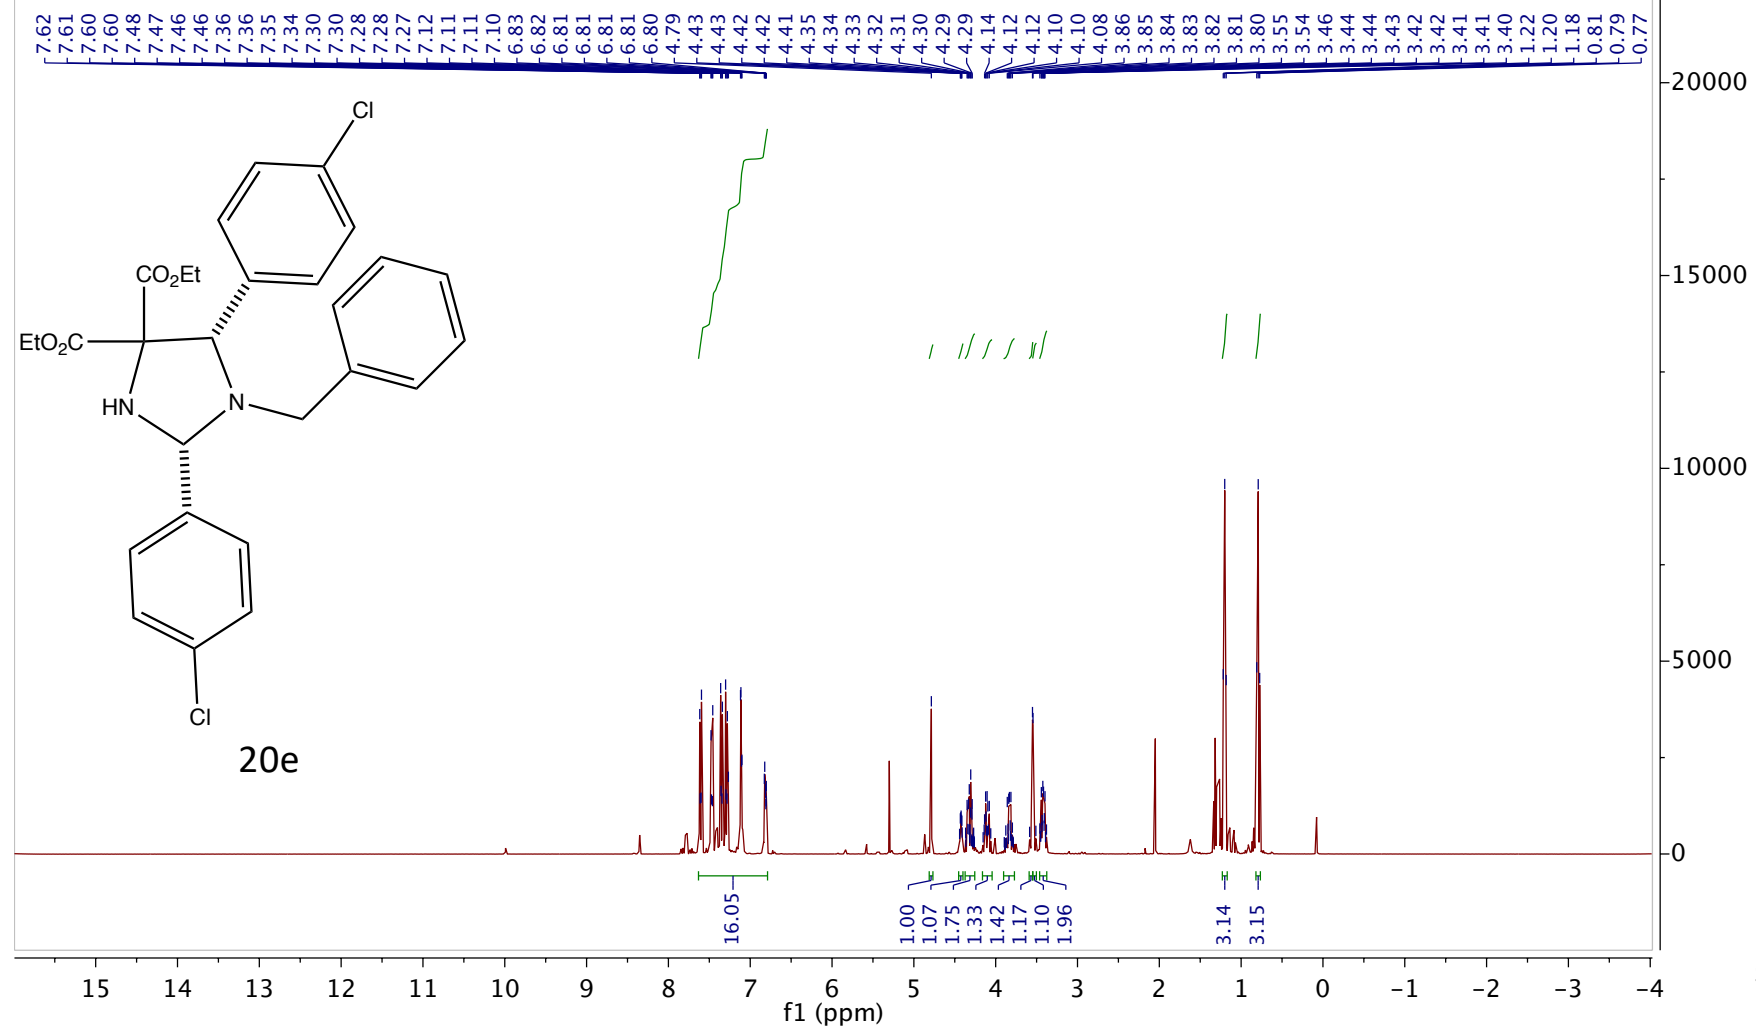

Jan09-2020-1-LS608(P) B7-C5.4.fid  
Instrument AVF400  
Chemist Liban Saney  
Group MGM  
Project Account Code DM7300  
c13acq\_512.crl CDCl3 {C:\NMR} mgmgrp 1

$^{13}\text{C}$  NMR (101 MHz  $\text{CDCl}_3$ )

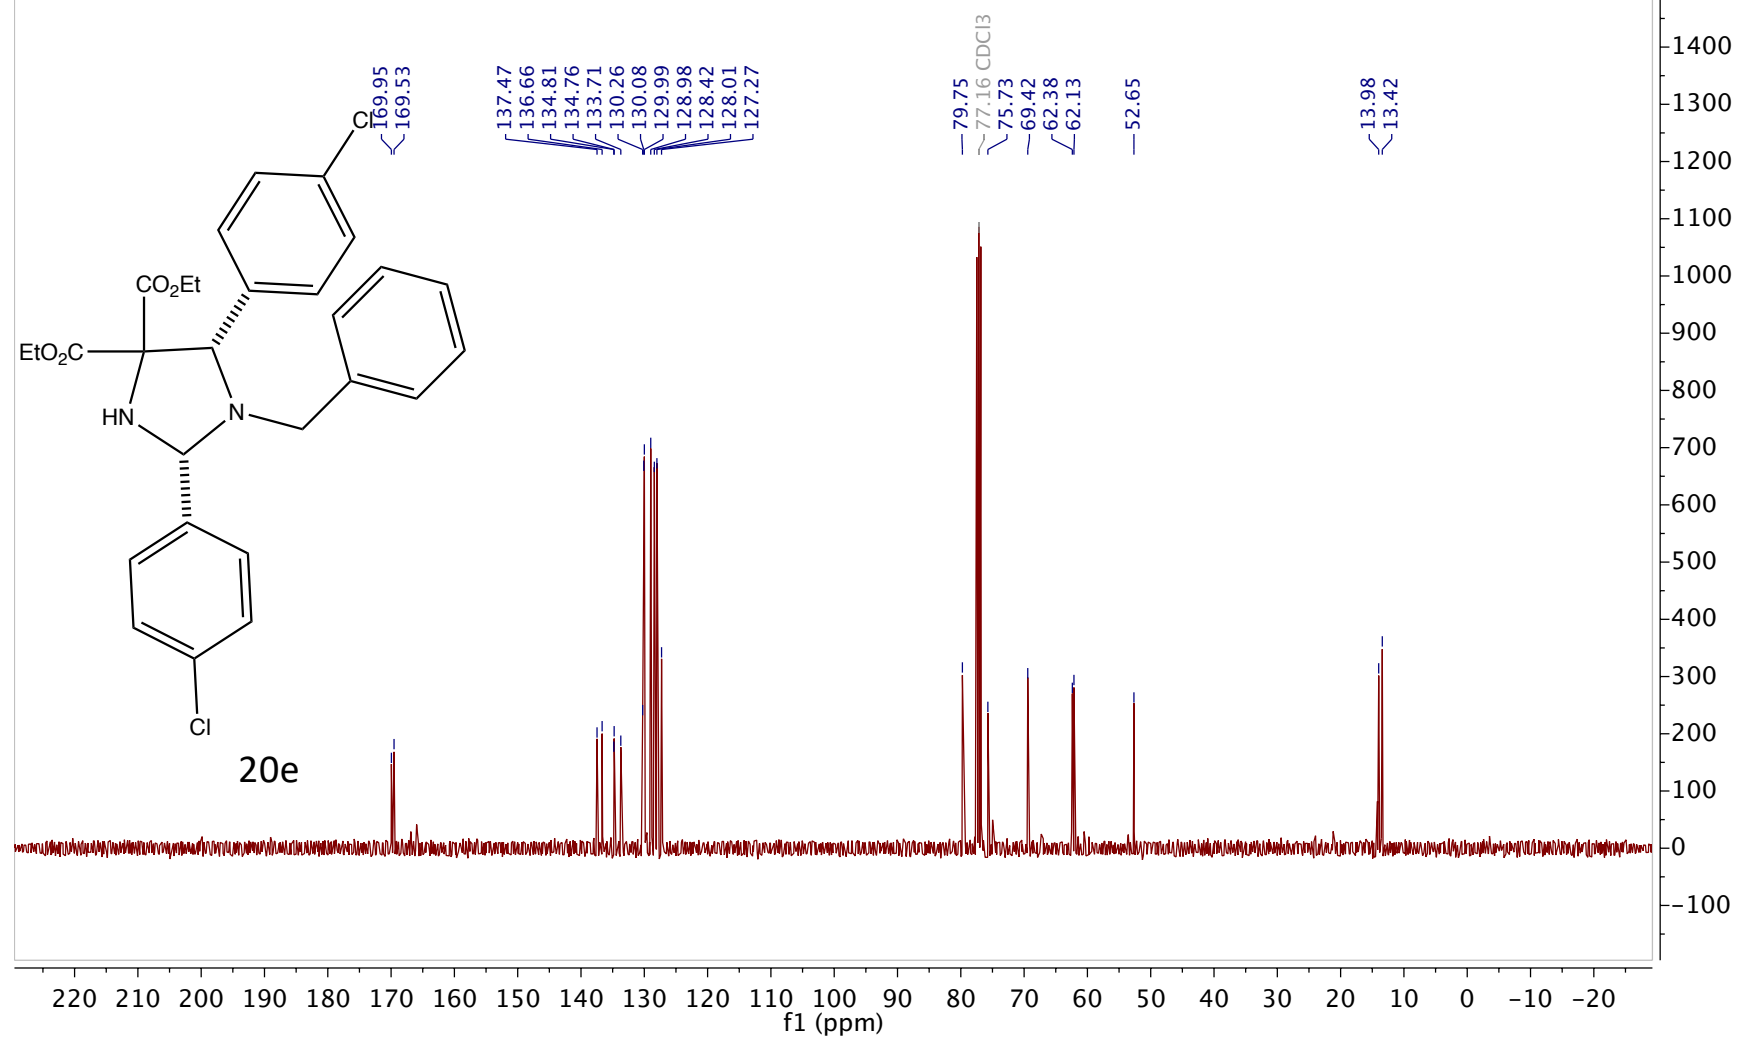

Jan09-2020-1-LS608(P) A8-B6.1.fid  
Instrument AVF400  
Chemist Liban Saney  
Group MGM  
Project Account Code DM7300  
h1acq.crl CDCl3 {C:\NMR} mgmgrp 1

<sup>1</sup>H NMR (400 MHz CDCl<sub>3</sub>)

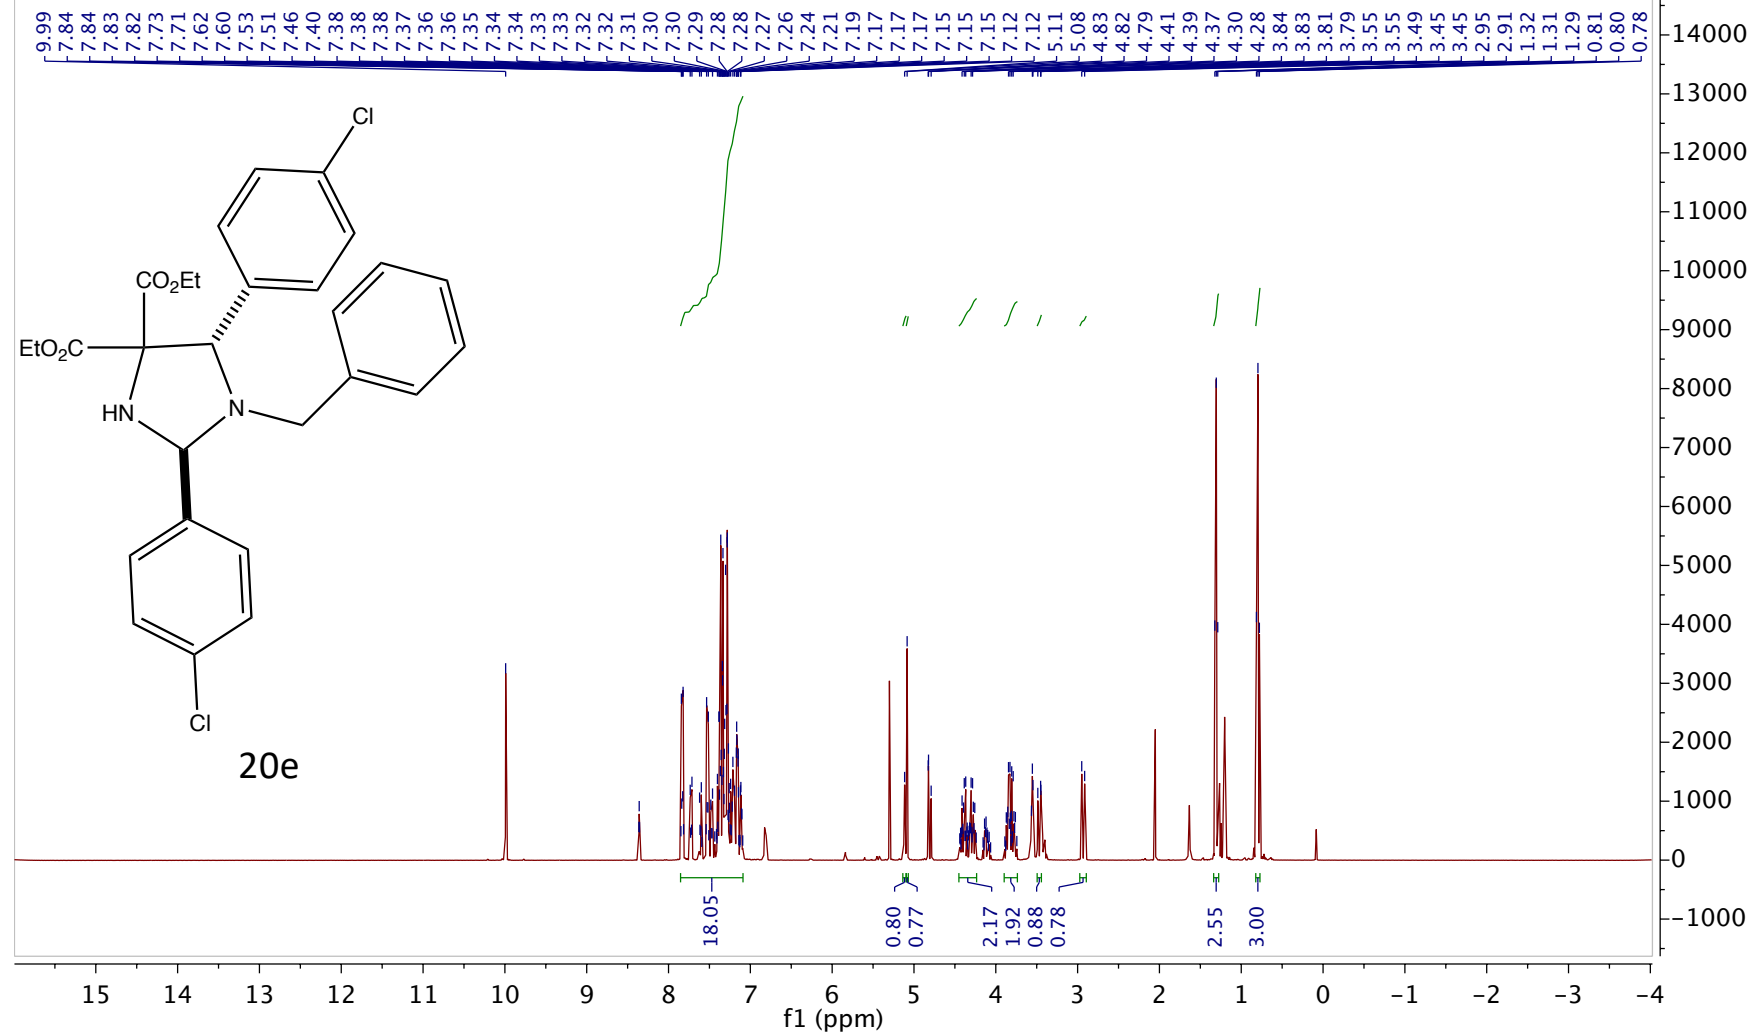

Jan09-2020-1-LS608(P) A8-B6.4.fid  
Instrument AVF400  
Chemist Liban Saney  
Group MGM  
Project Account Code DM7300  
c13acq\_512.crl CDCl3 {C:\NMR} mgmgrp 1

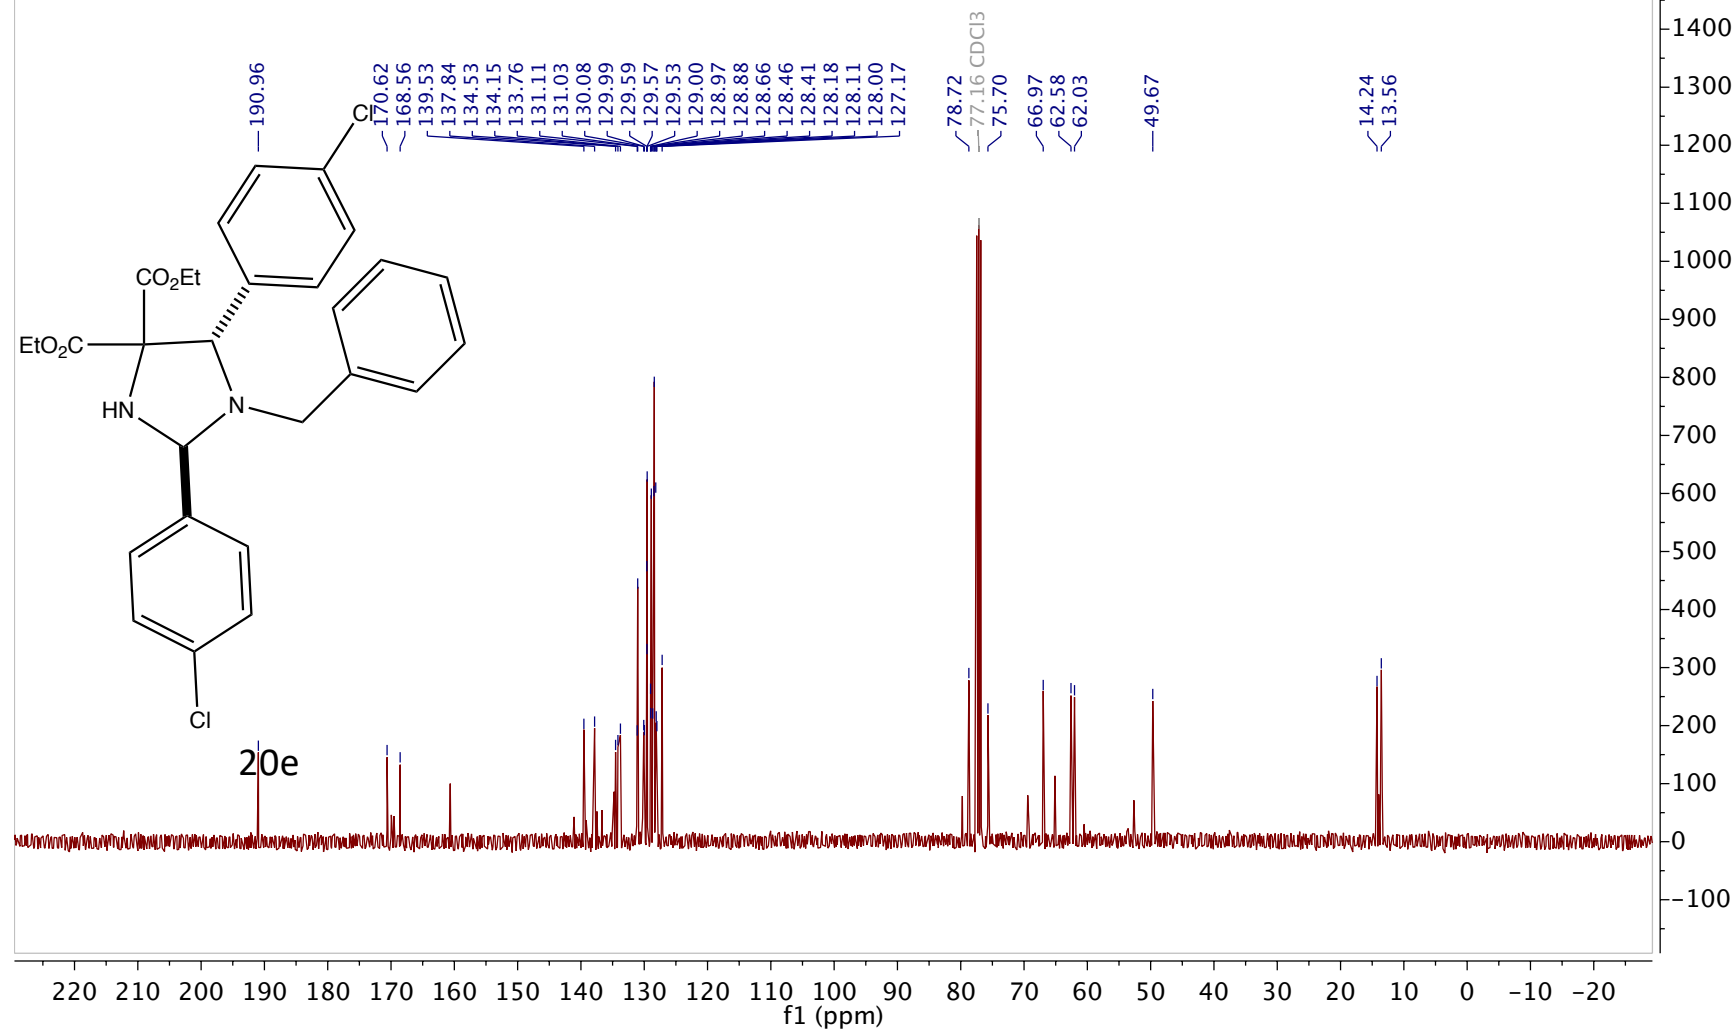

Apr02-2019-58-LS364(P) B7-D1.1.fid  
Instrument AVF400  
Chemist Liban Saney  
Group MGM  
Project Account Code DM7300  
h1acq.crl CDCl3 {C:\NMR} mgmgrp 58

<sup>1</sup>H NMR (400 MHz CDCl<sub>3</sub>)

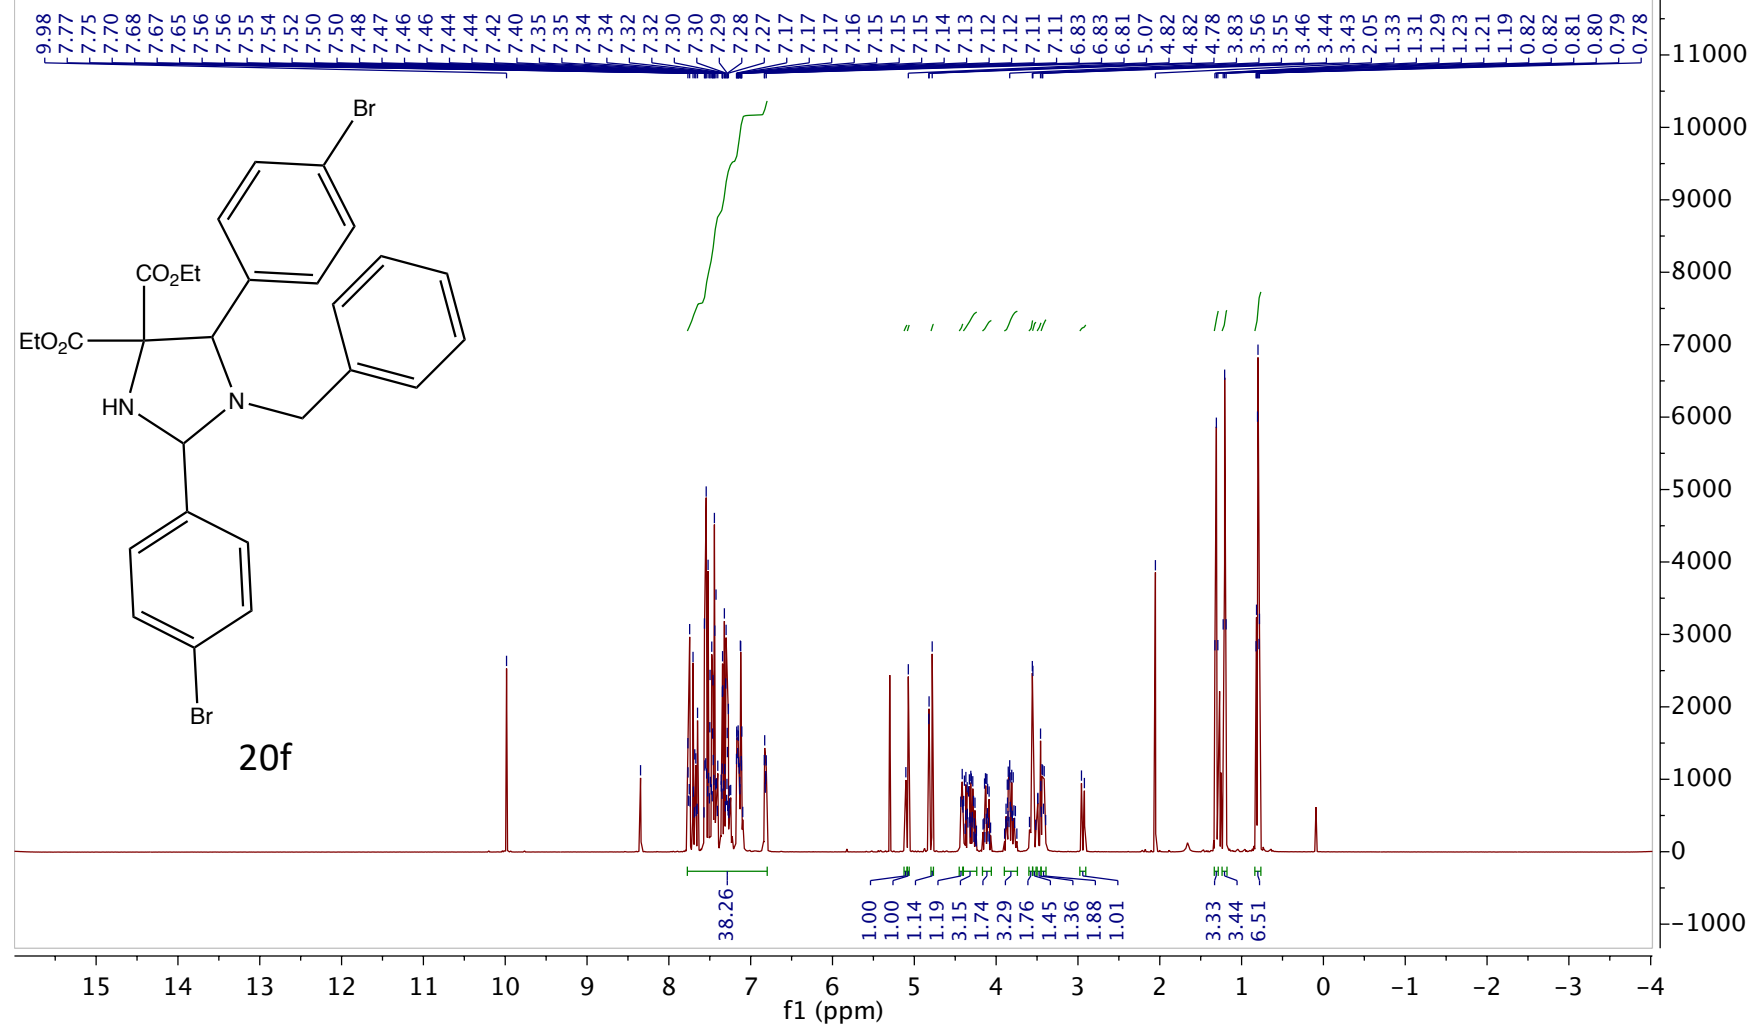



Apr02-2019-58-LS364(P) B7-D1.4.fid  
Instrument AVF400  
Chemist Liban Saney  
Group MGM  
Project Account Code DM7300  
c13acq\_512.crl CDCl3 {C:\NMR} mgmgrp 58

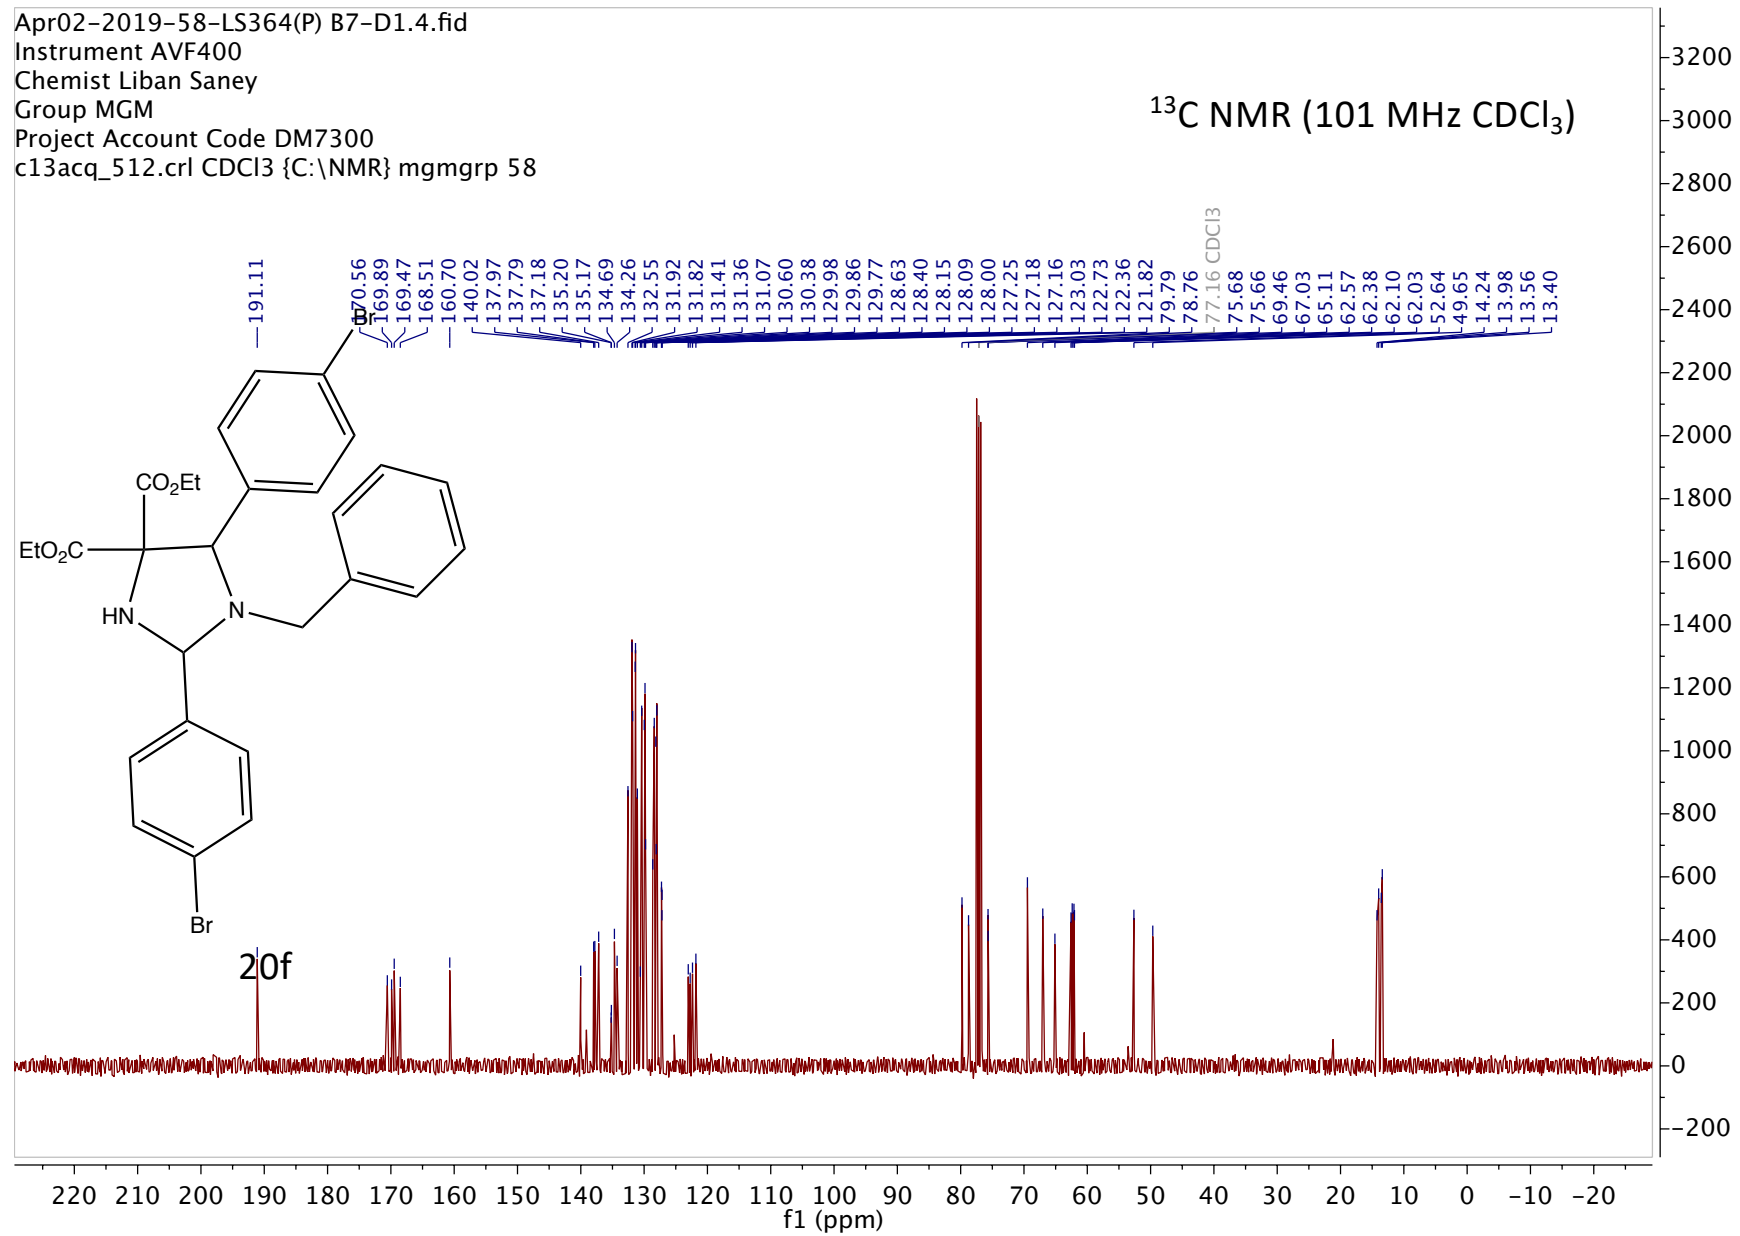

Jan13-2020-1-LS610(P) B11-C8.1.fid  
Instrument AVF400  
Chemist Liban Saney  
Group MGM  
Project Account Code DM7300  
h1acq.crl CDCl3 {C:\NMR} mgmgrp 1

<sup>1</sup>H NMR (400 MHz CDCl<sub>3</sub>)

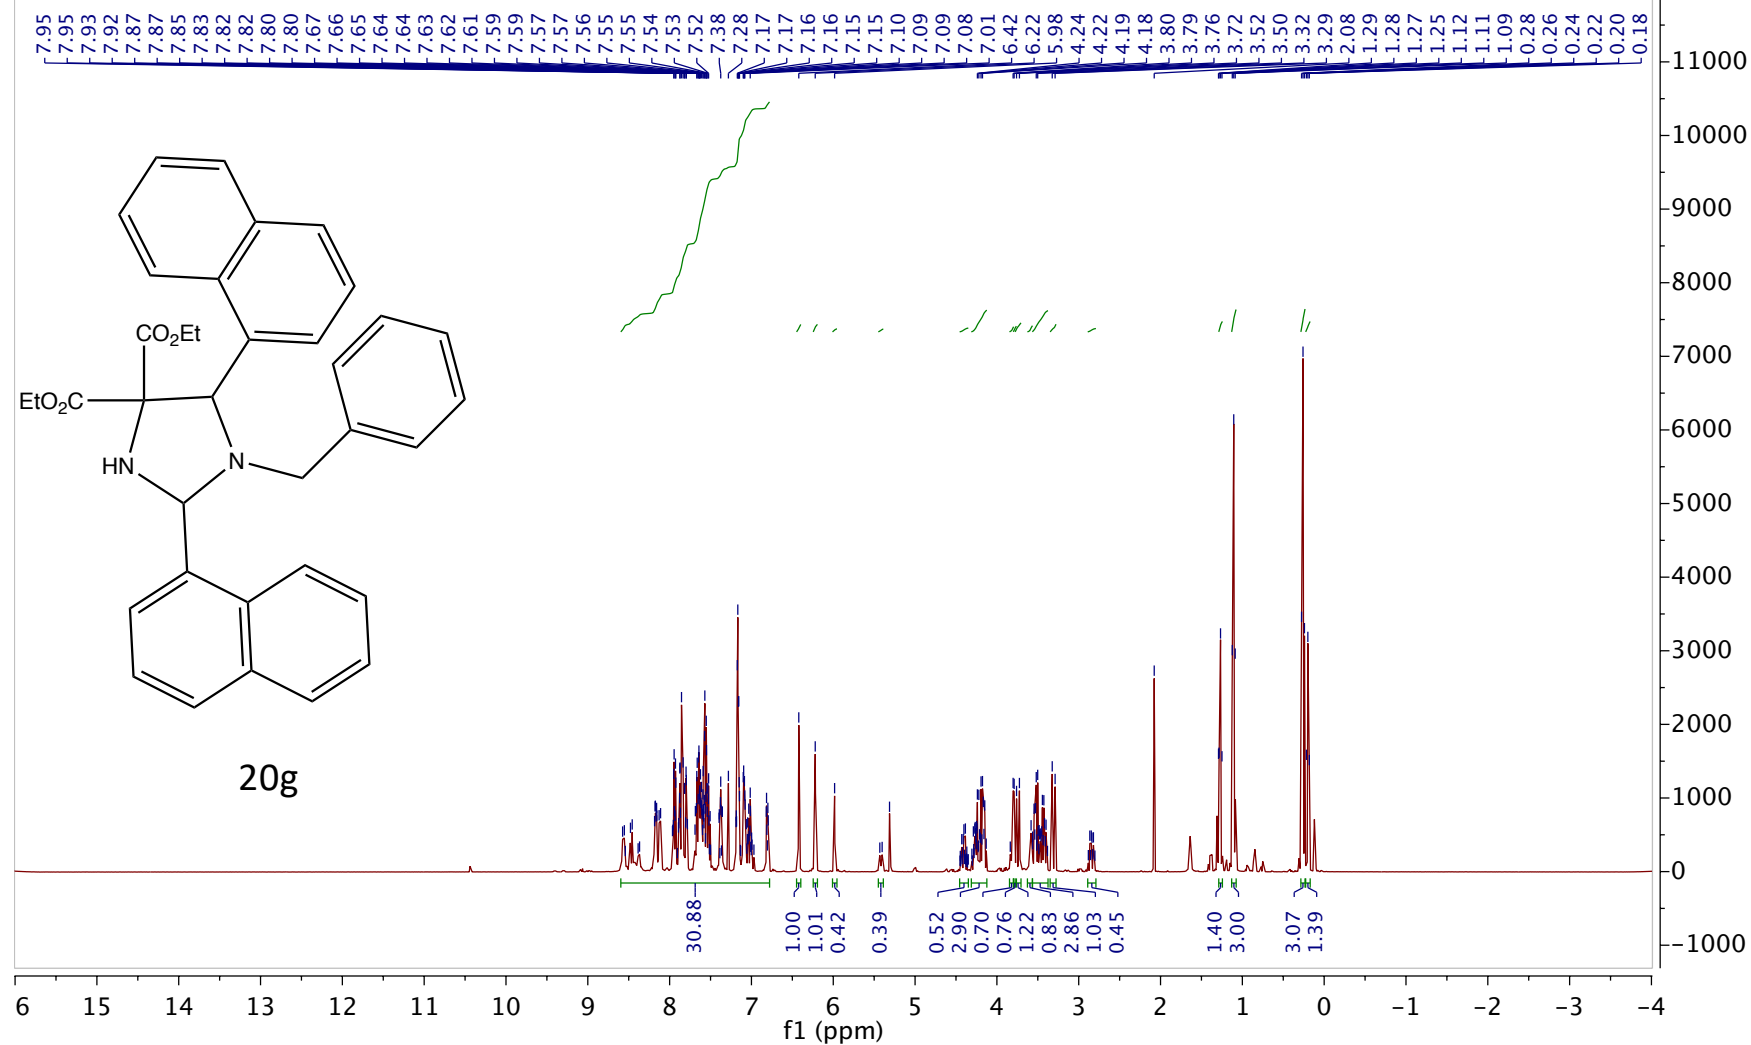

Jan13-2020-1-LS610(P) B11-C8.5.fid  
Instrument AVF400  
Chemist Liban Saney  
Group MGM  
Project Account Code DM7300  
c13acq\_512.crl CDCl3 {C:\NMR} mgmgrp 1

<sup>13</sup>C NMR (101 MHz CDCl<sub>3</sub>)

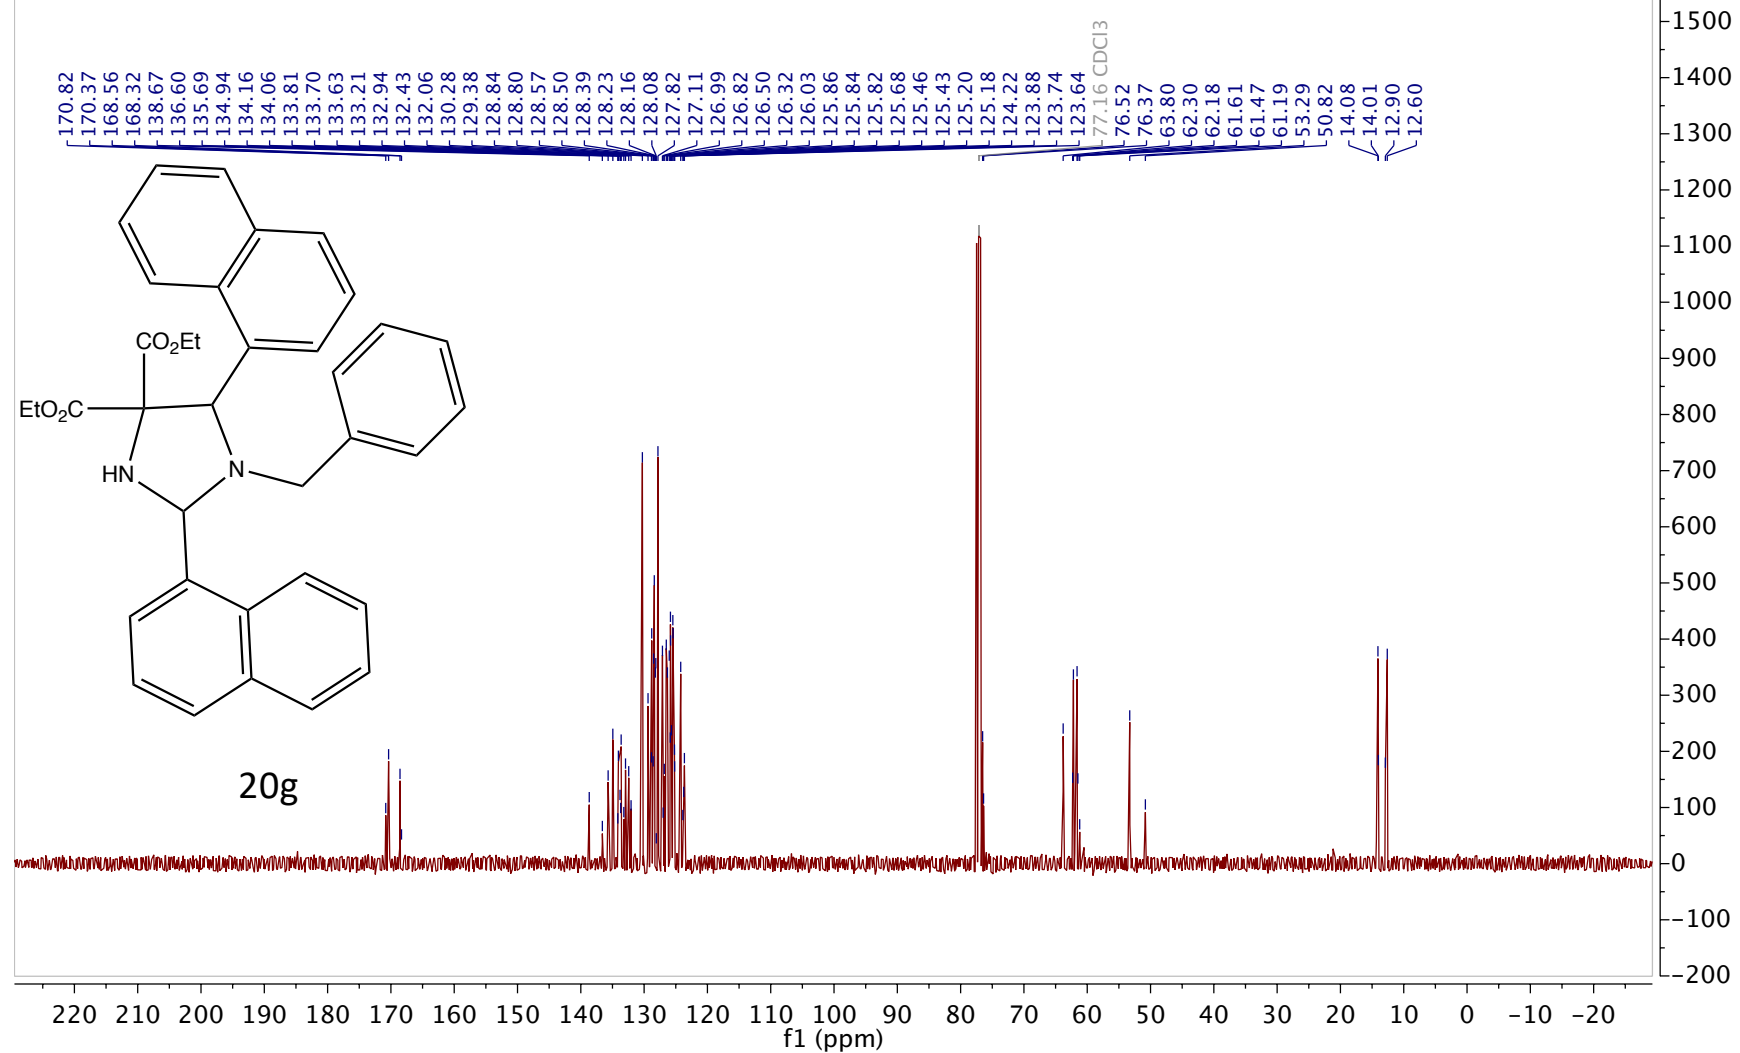

Sep18-2019-59-LS534(P) D8-F6.1.fid  
Instrument AVF400  
Chemist Liban Saney  
Group MGM  
Project Account Code DM7300  
h1acq.crl CDCl3 {C:\NMR} mgmgrp 59

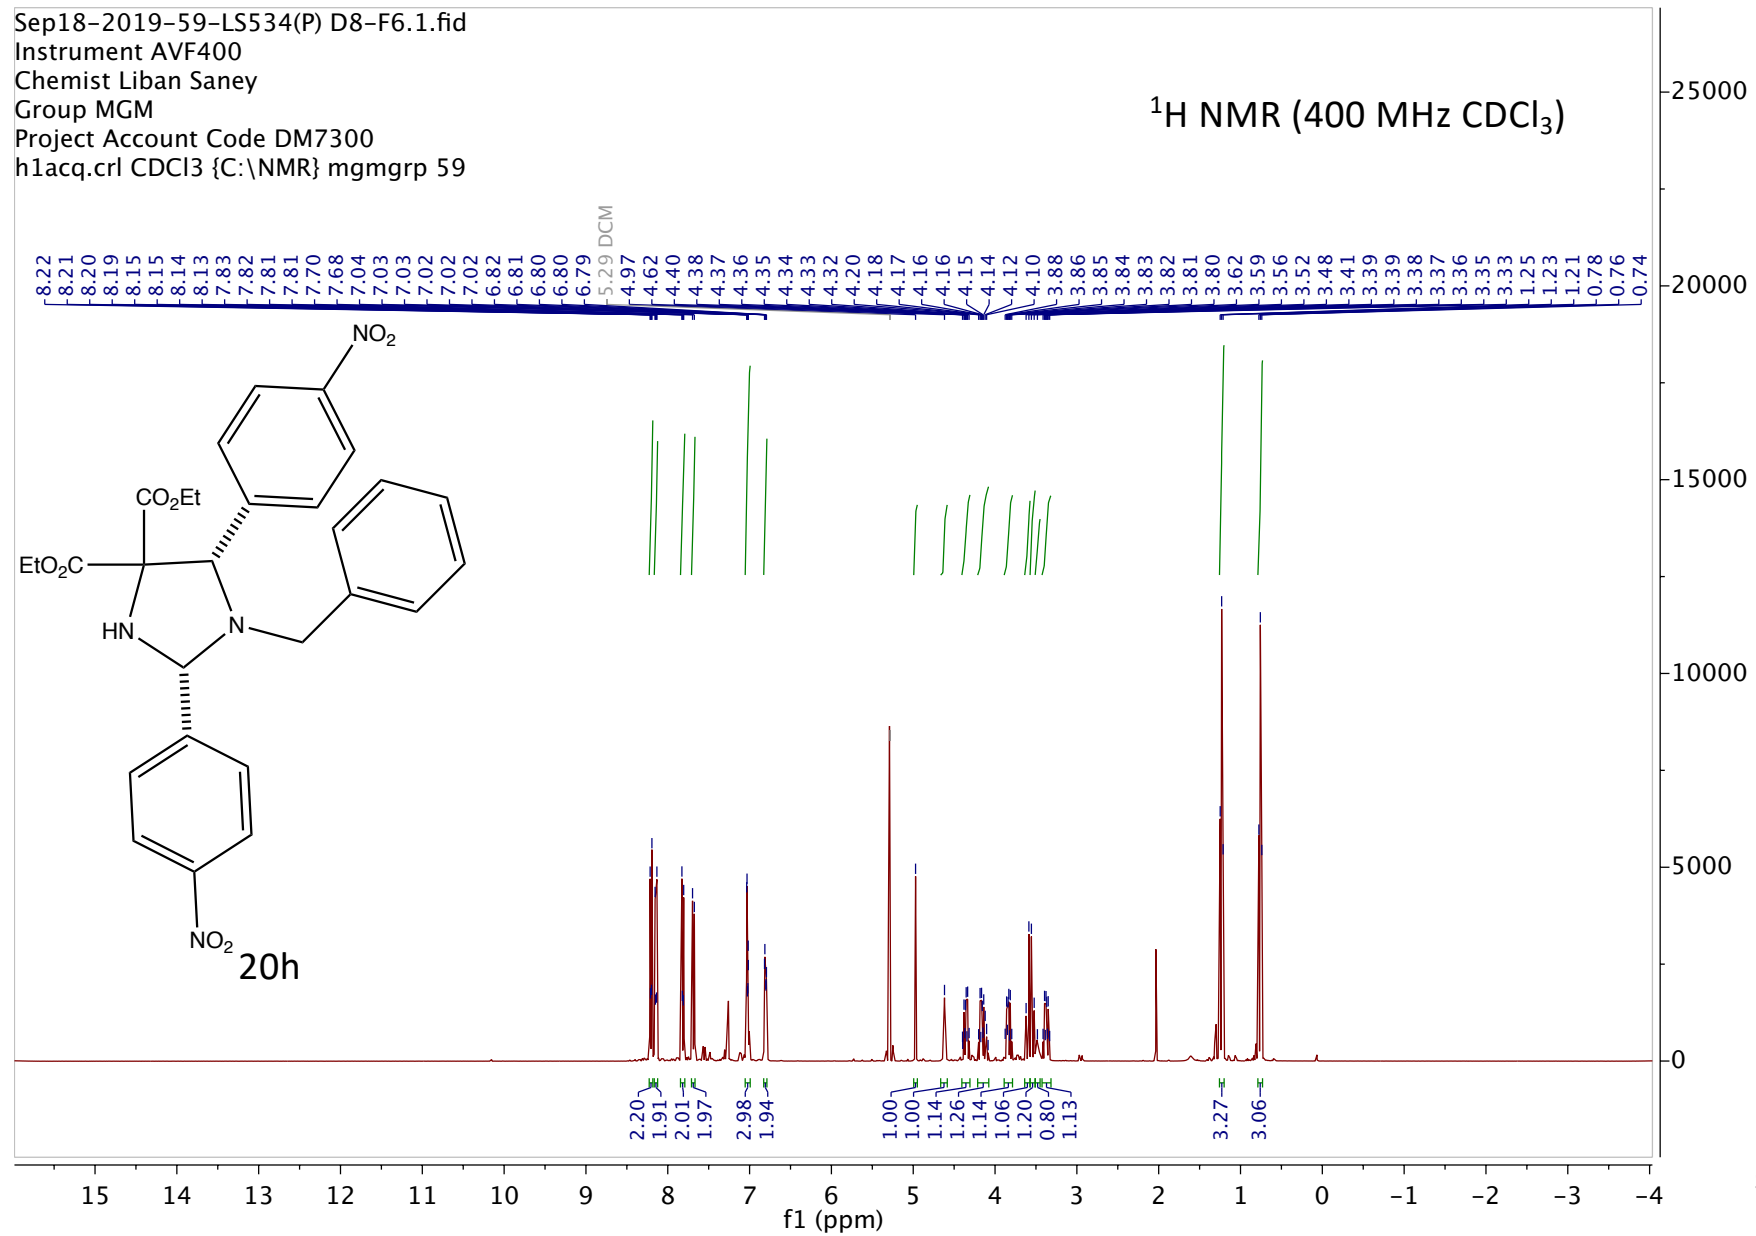

Sep18-2019-59-LS534(P) D8-F6.4.fid  
Instrument AVF400  
Chemist Liban Saney  
Group MGM  
Project Account Code DM7300  
c13acq\_512.crl CDCl3 {C:\NMR} mgmgrp 59

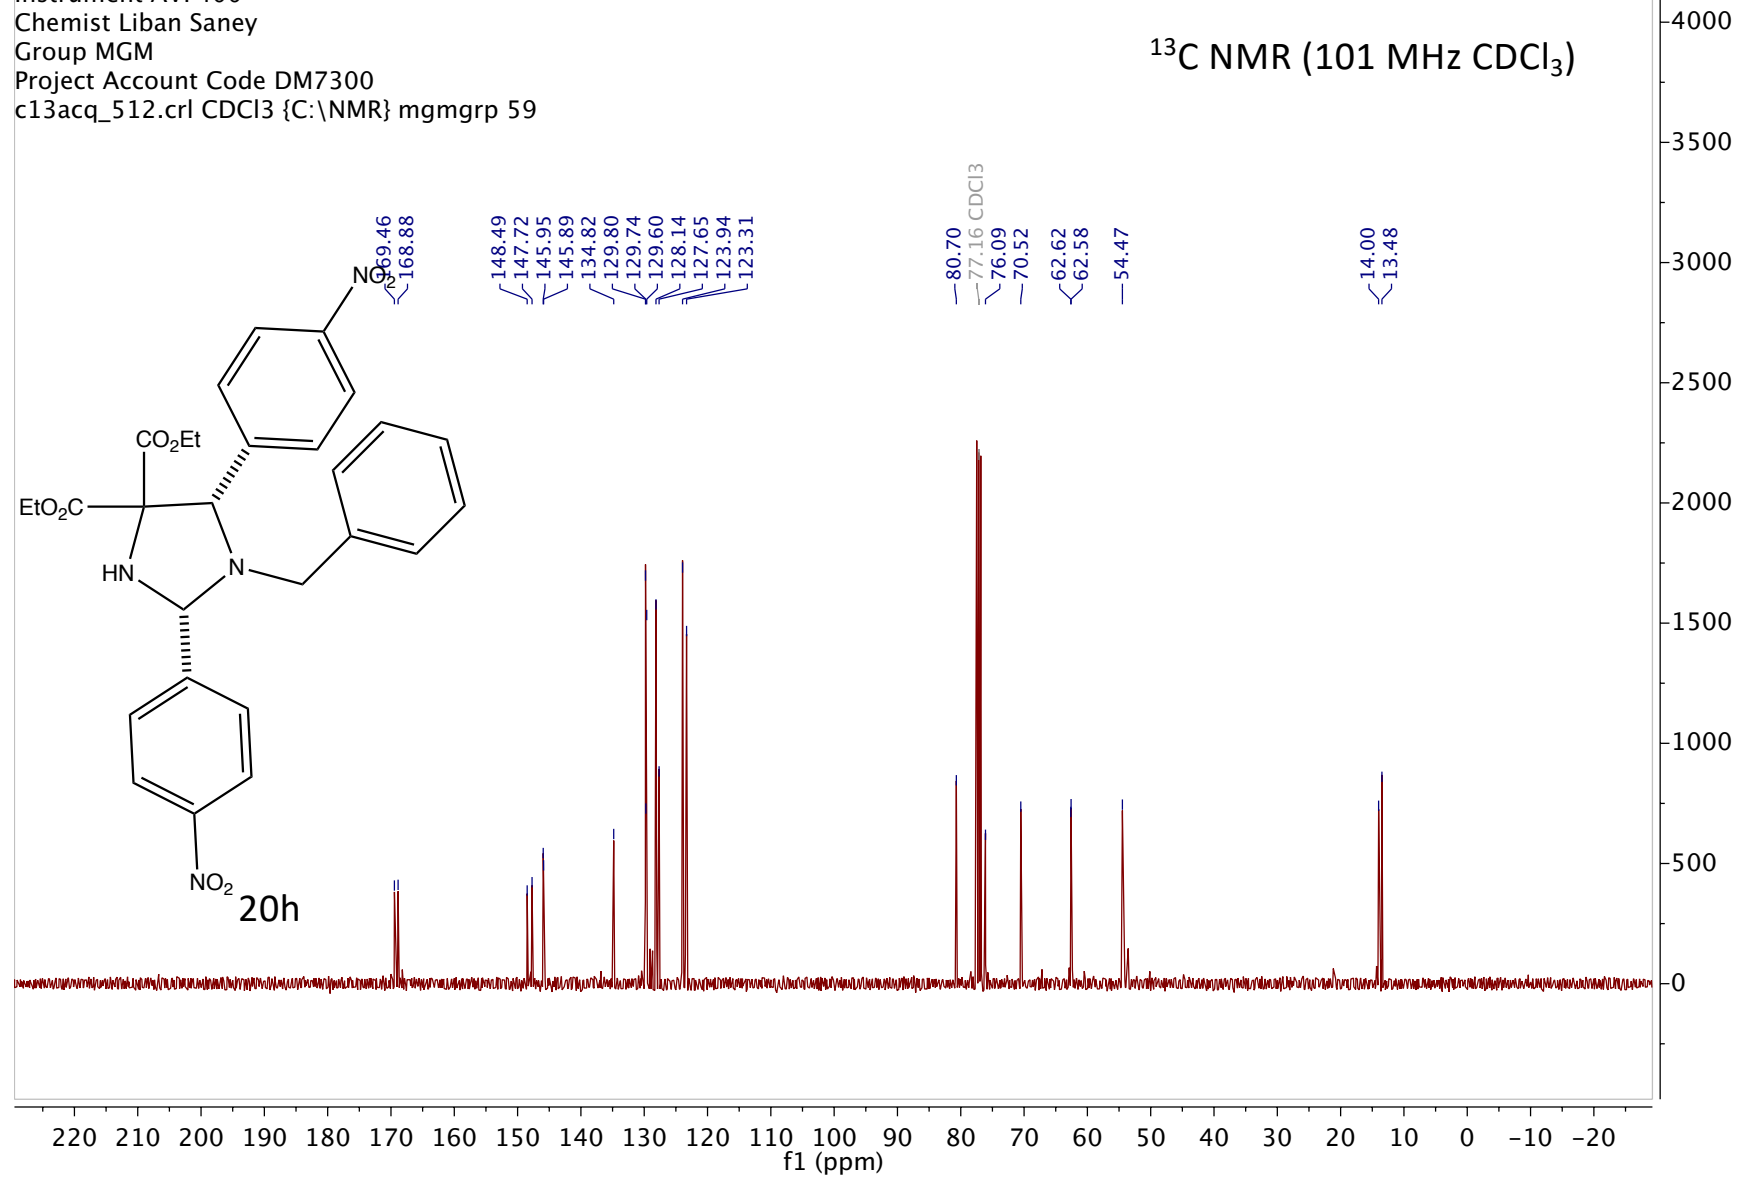

Apr24-2019-50-LS390(C).1.fid  
Instrument AVF400  
Chemist Liban Saney  
Group MGM  
Project Account Code DM7300  
h1acq.crl CDCl3 {C:\NMR} mgmgrp 50

<sup>1</sup>H NMR (400 MHz CDCl<sub>3</sub>)

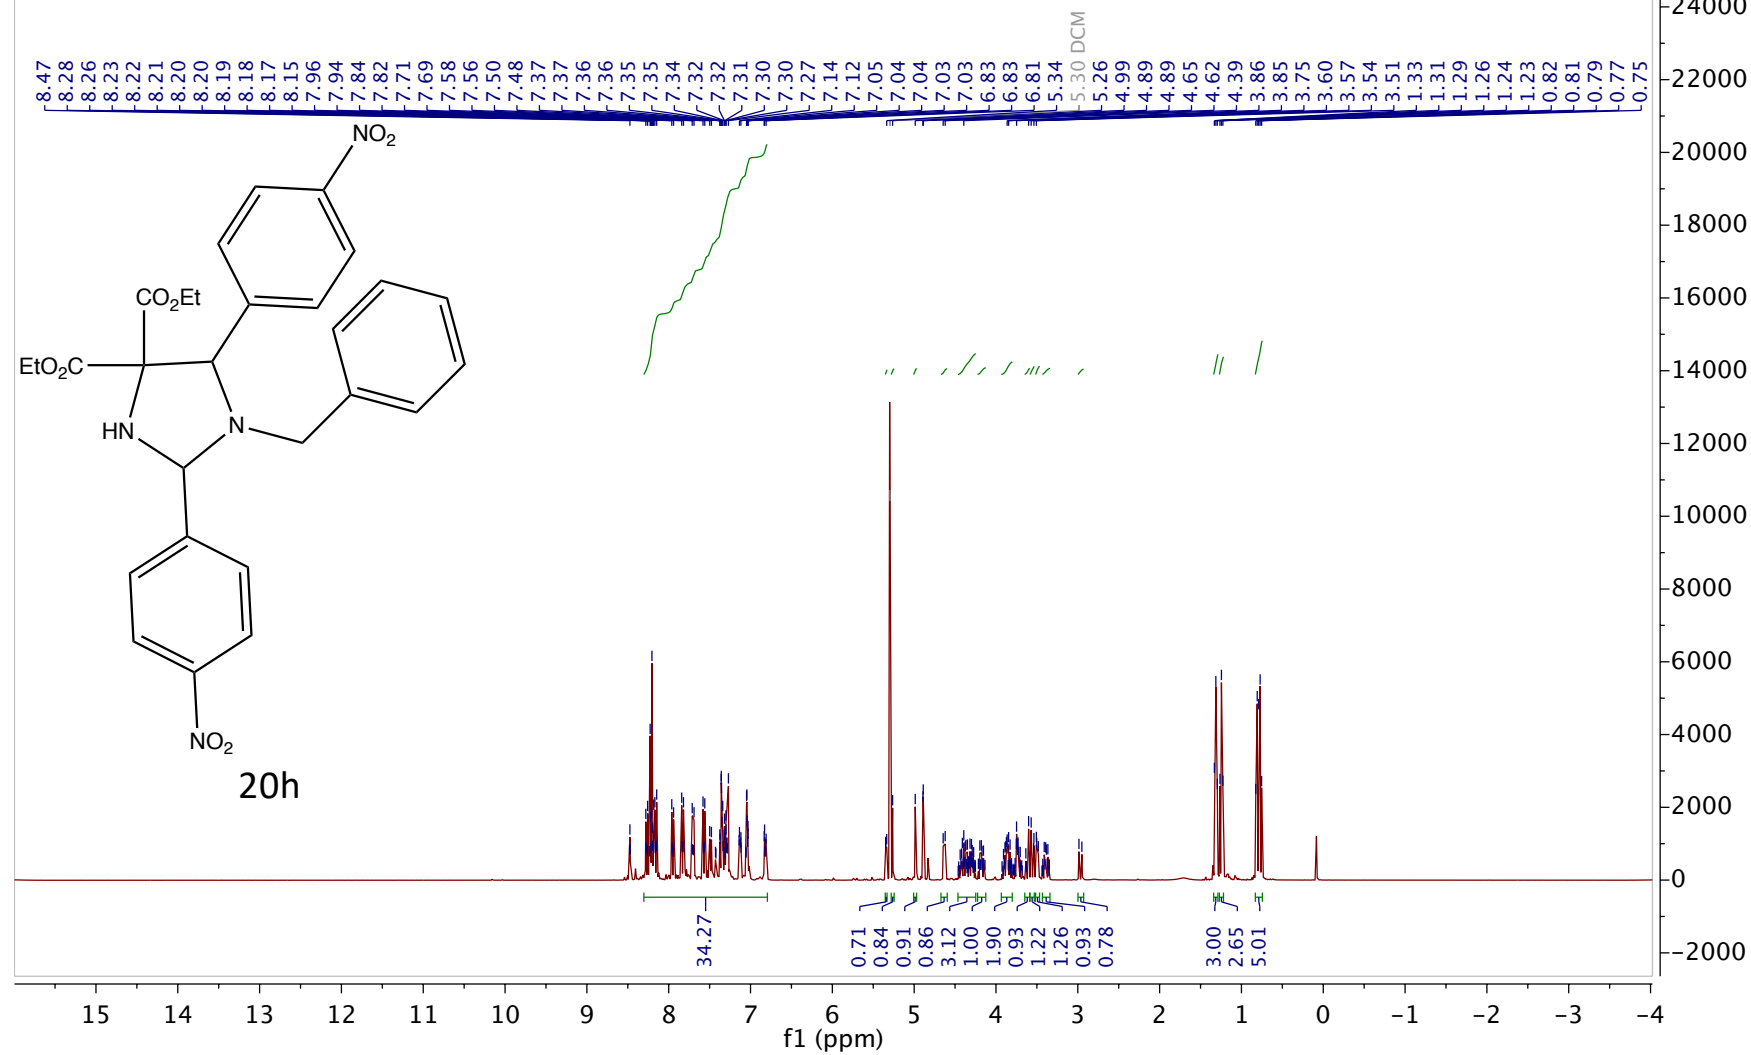

Apr24-2019-50-LS390(C).4.fid

Instrument AVF400

Chemist Liban Saney

Group MGM

Project Account Code DM7300

c13acq\_512.crl CDCl3 {C:\NMR} mgmgrp 50

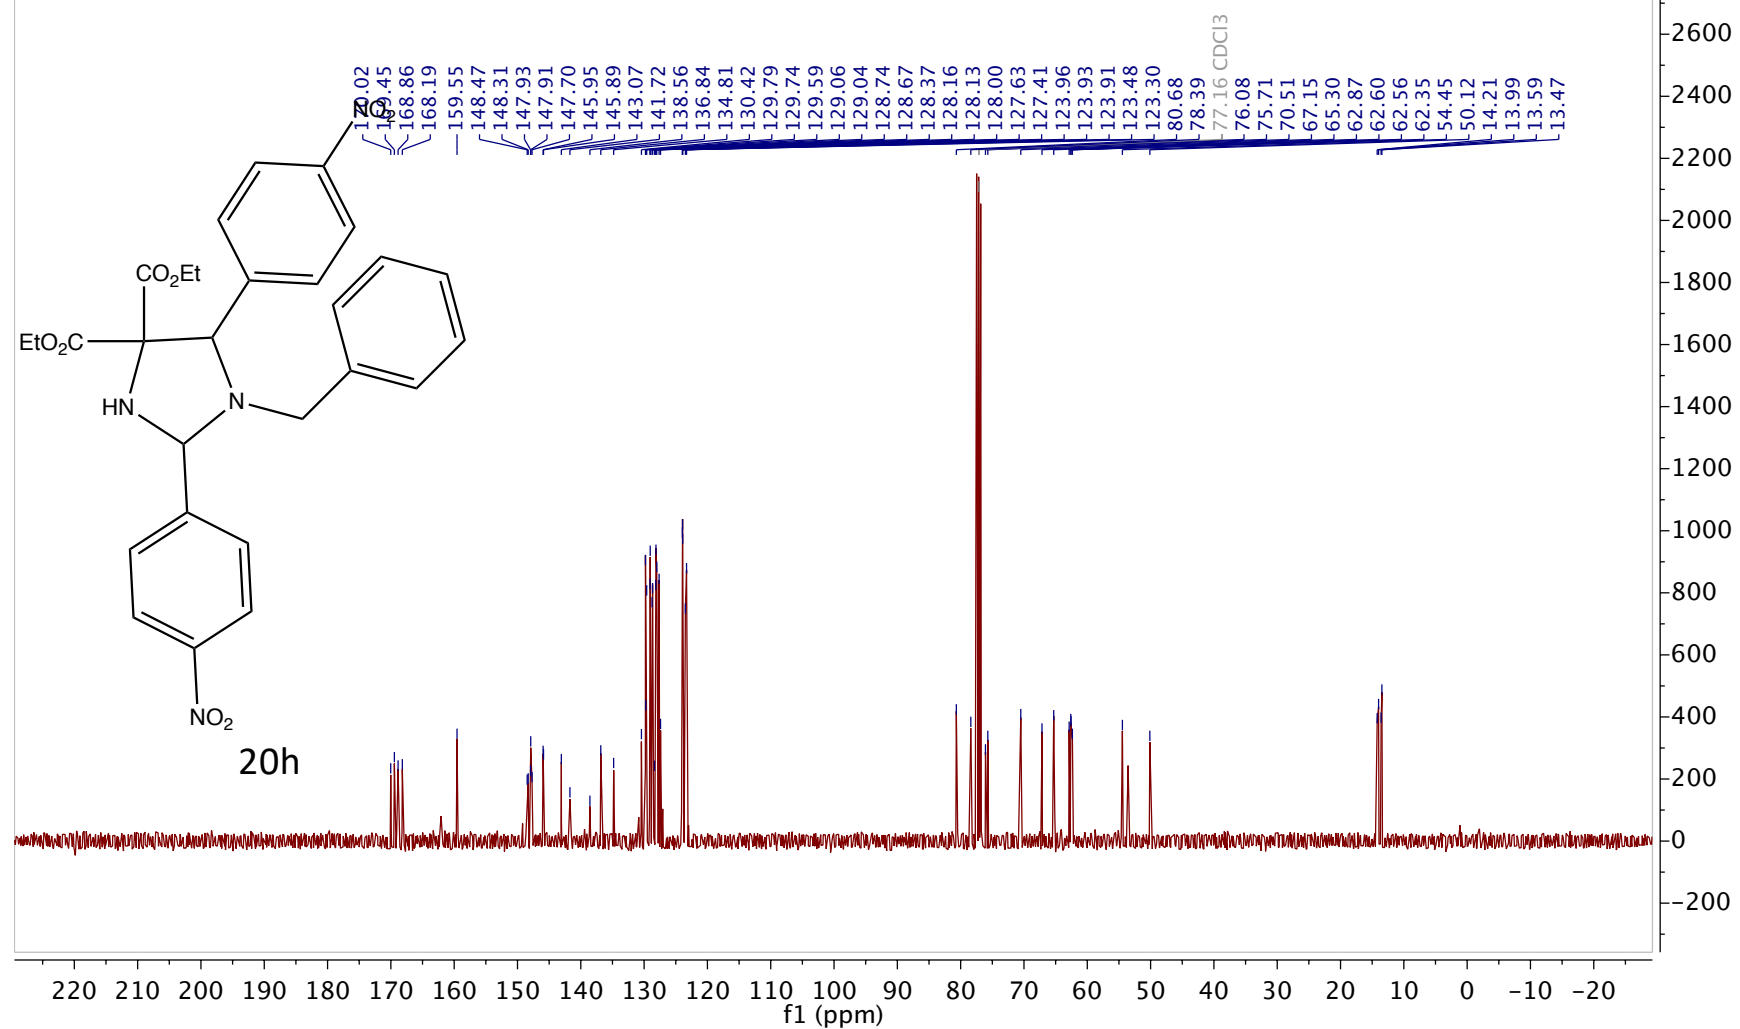

Jan14-2020-1-LS611(P) A12-B9.1.fid  
Instrument AVF400  
Chemist Liban Saney  
Group MGM  
Project Account Code DM7300  
h1acq.crl CDCl3 {C:\NMR} mgmgrp 1

<sup>1</sup>H NMR (400 MHz CDCl<sub>3</sub>)

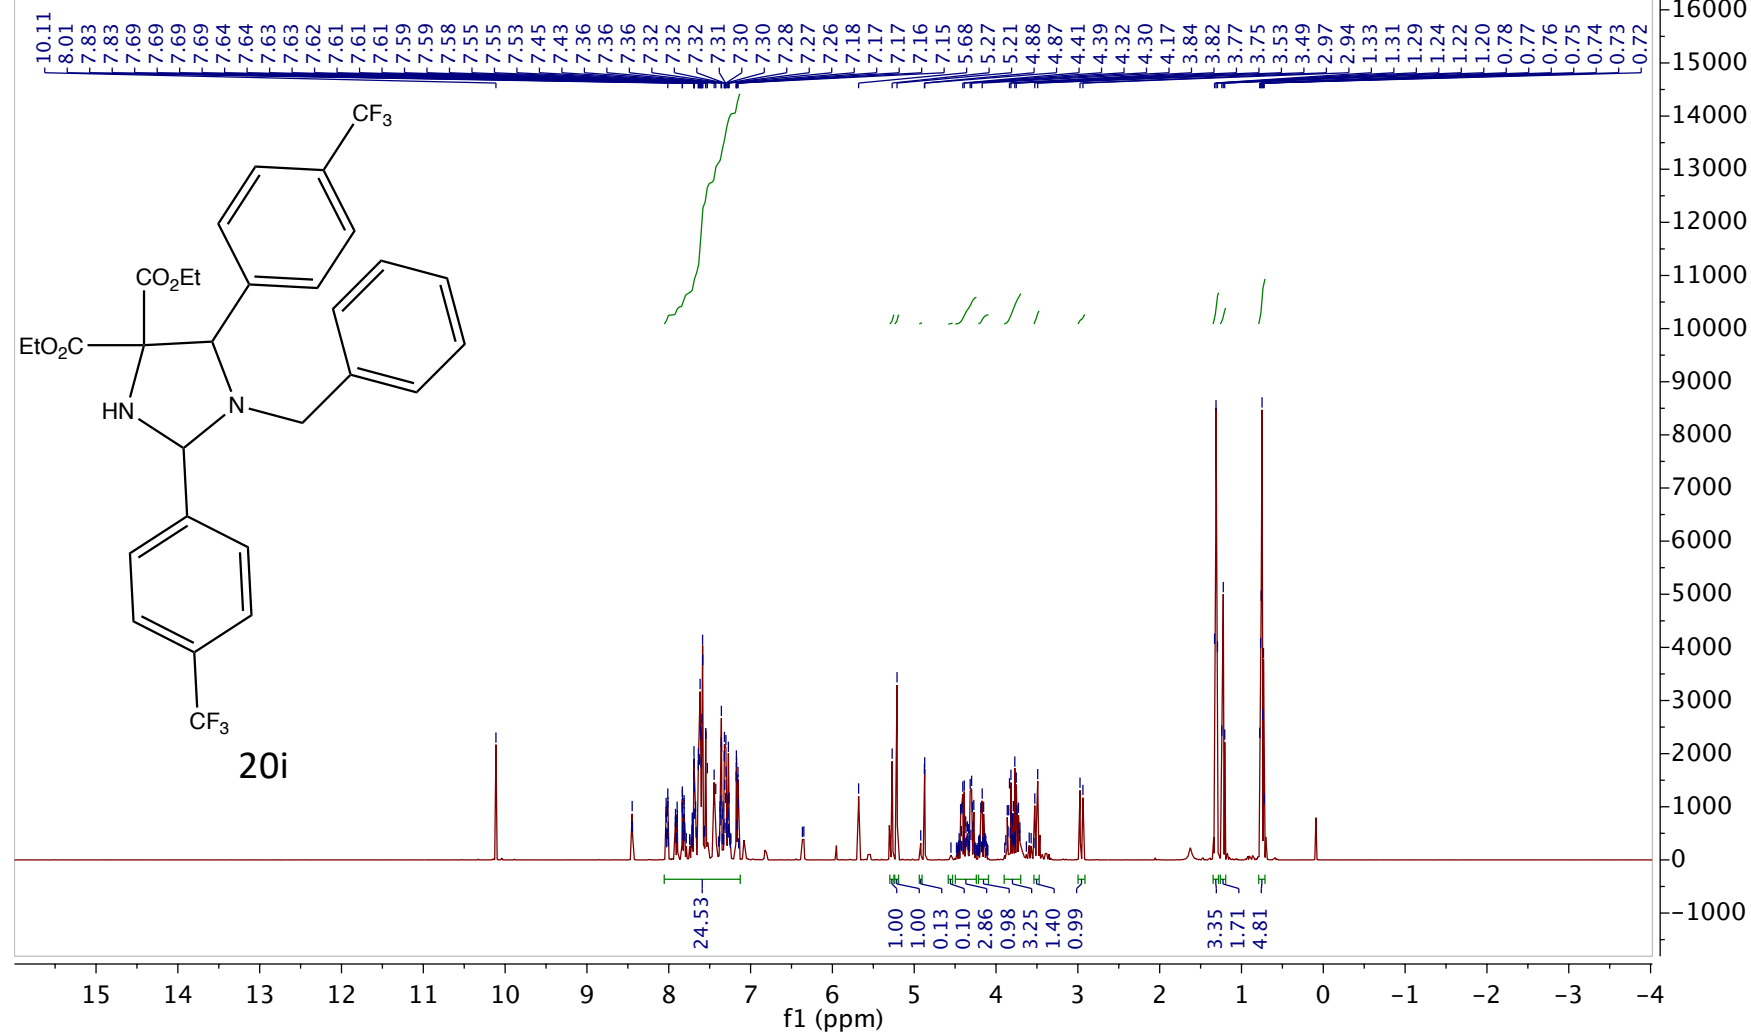



Jan14-2020-1-LS611(P) A12-B9.4.fid  
Instrument AVF400  
Chemist Liban Saney  
Group MGM  
Project Account Code DM7300  
c13acq\_512.crl CDCl3 {C:\NMR} mgmgrp 1

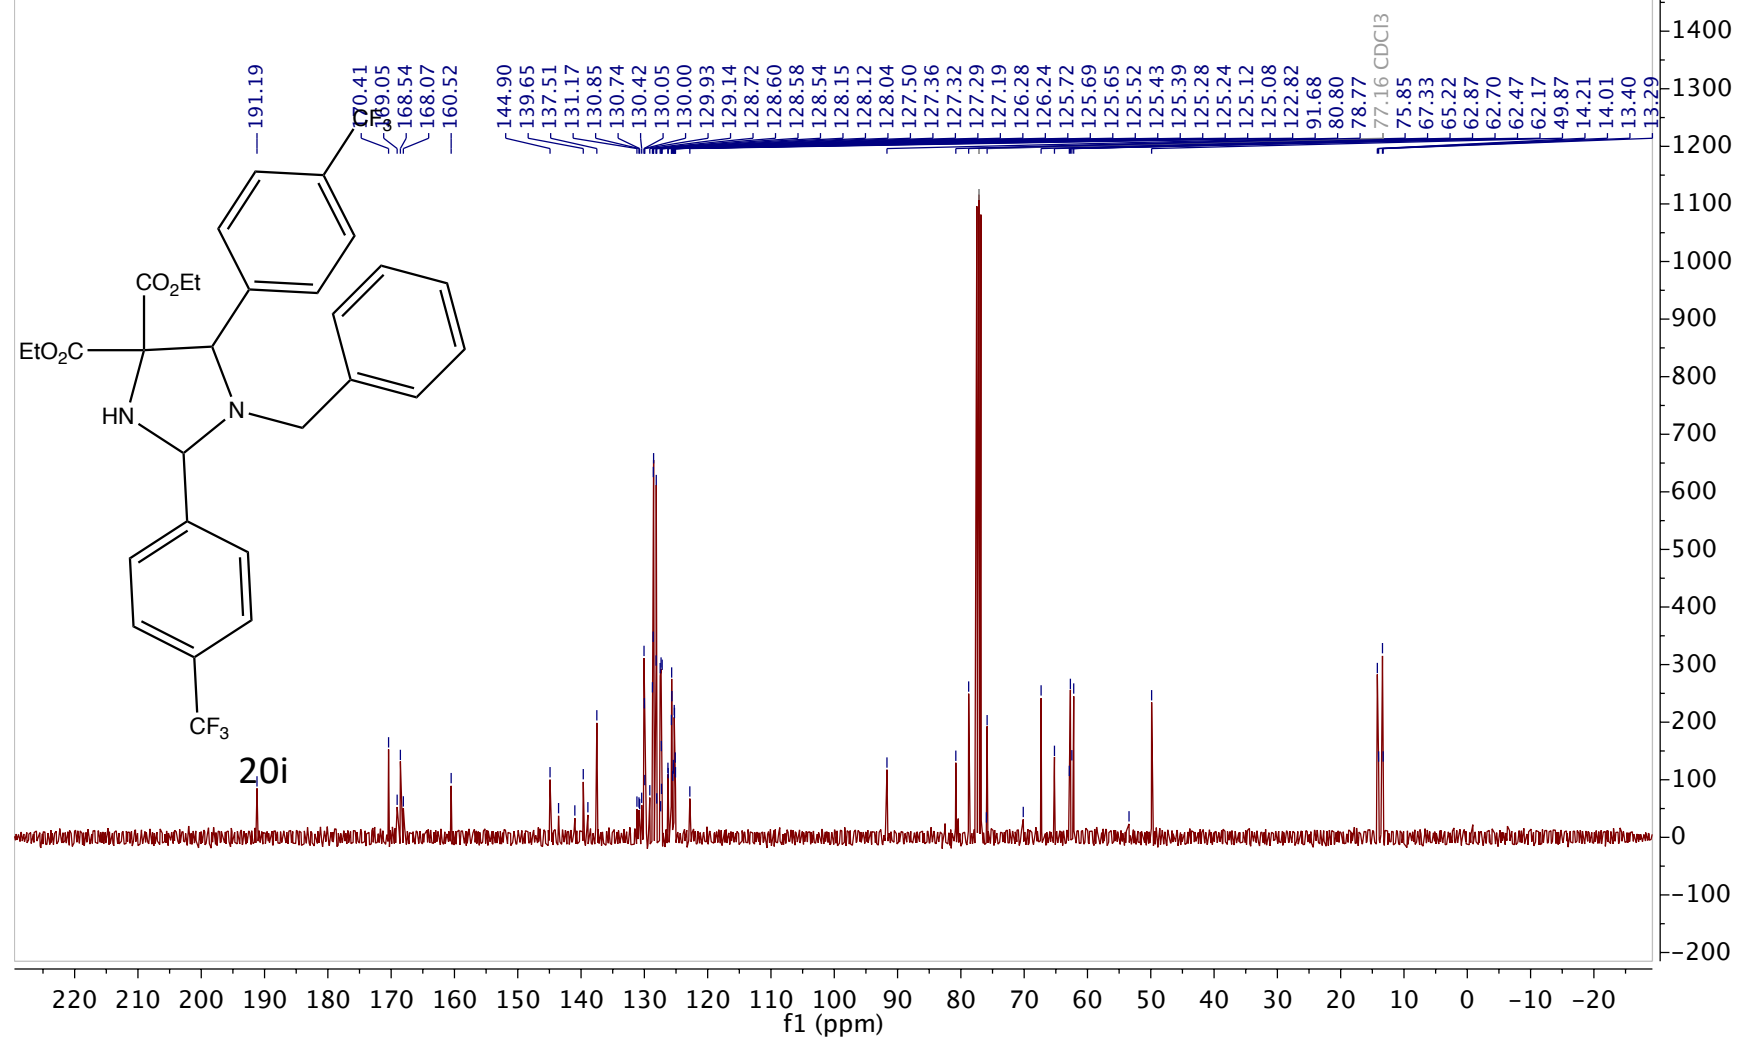

Jan20-2020-1-LS619(P) E4-F4.1.fid  
Instrument AVF400  
Chemist Liban Saney  
Group MGM  
Project Account Code DM7300  
h1acq.crl CDCl3 {C:\NMR} mgmgrp 1

<sup>1</sup>H NMR (400 MHz CDCl<sub>3</sub>)

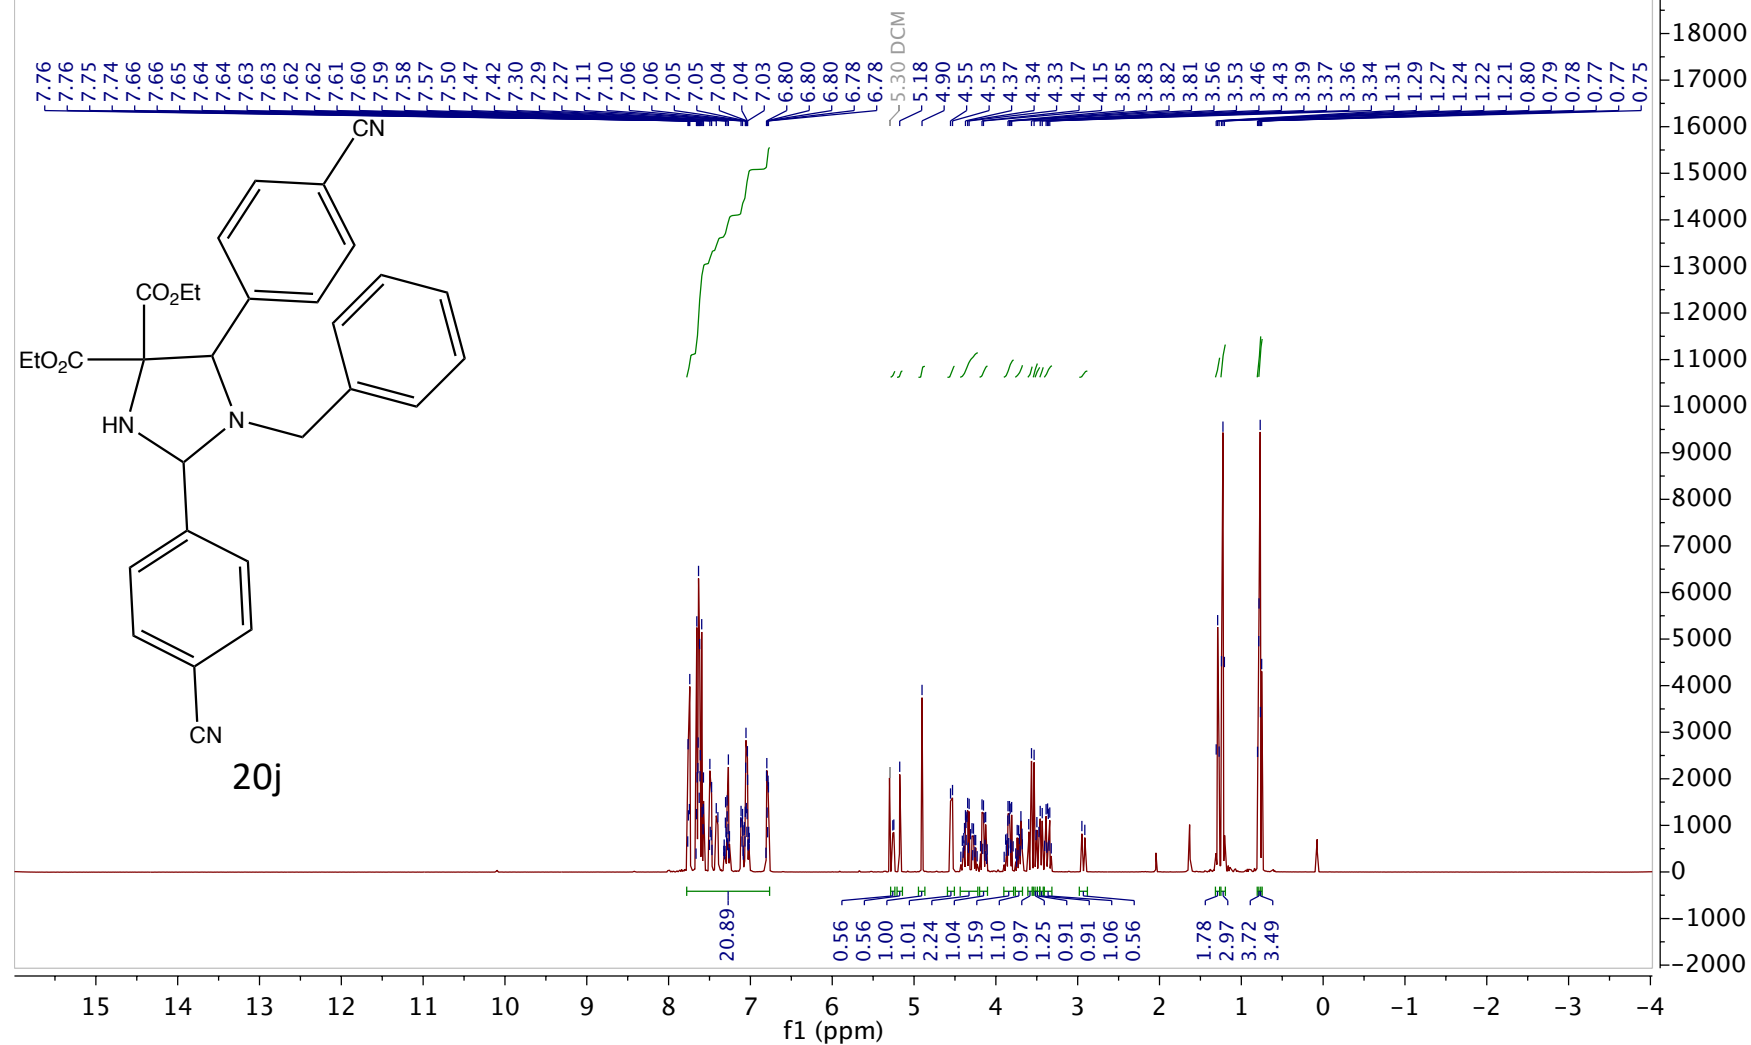

Jan20-2020-1-LS619(P) E4-F4.4.fid  
Instrument AVF400  
Chemist Liban Saney  
Group MGM  
Project Account Code DM7300  
c13acq\_512.crl CDCl3 {C:\NMR} mgmgrp 1

<sup>13</sup>C NMR (101 MHz CDCl<sub>3</sub>)

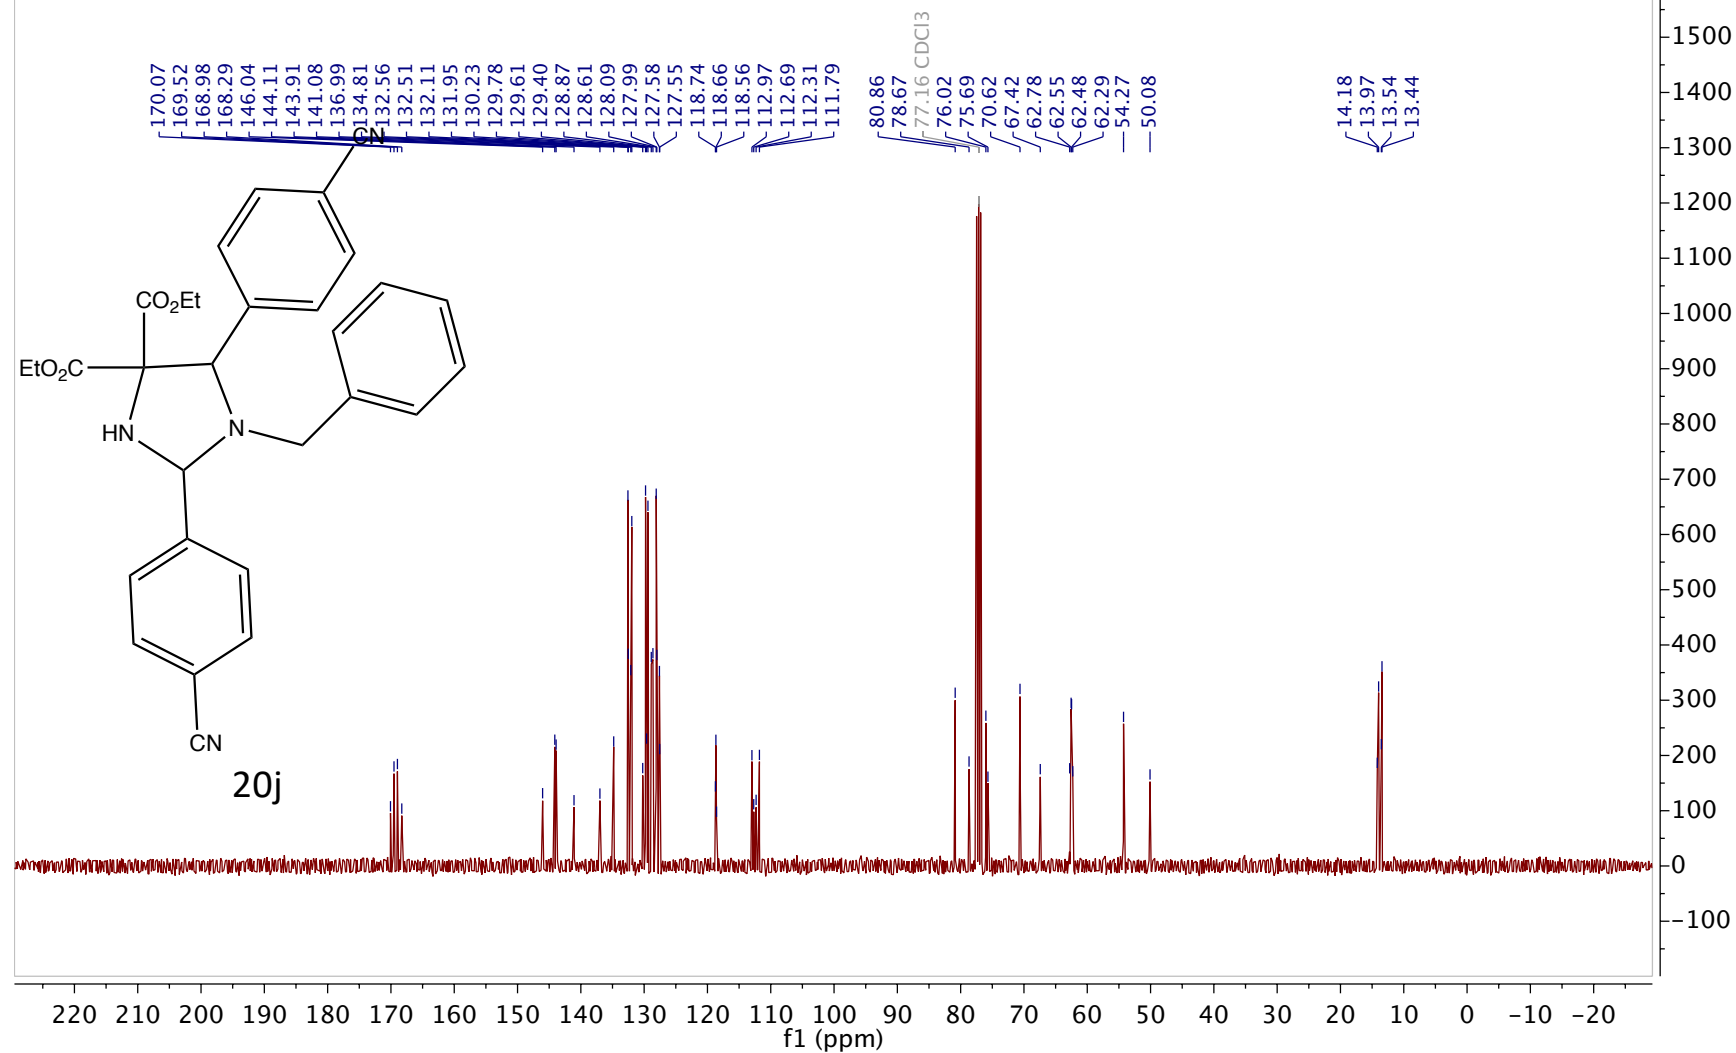

Jan25-2020-14-LS626(P) B11-C8.1.fid  
Instrument AVH400  
Chemist Liban Saney  
Group MGM  
Project Account Code liban.saney@ccc.ox.ac.uk  
h1acq.crl CDCl3 {C:\NMR} mgmgrp 14

<sup>1</sup>H NMR (400 MHz CDCl<sub>3</sub>)

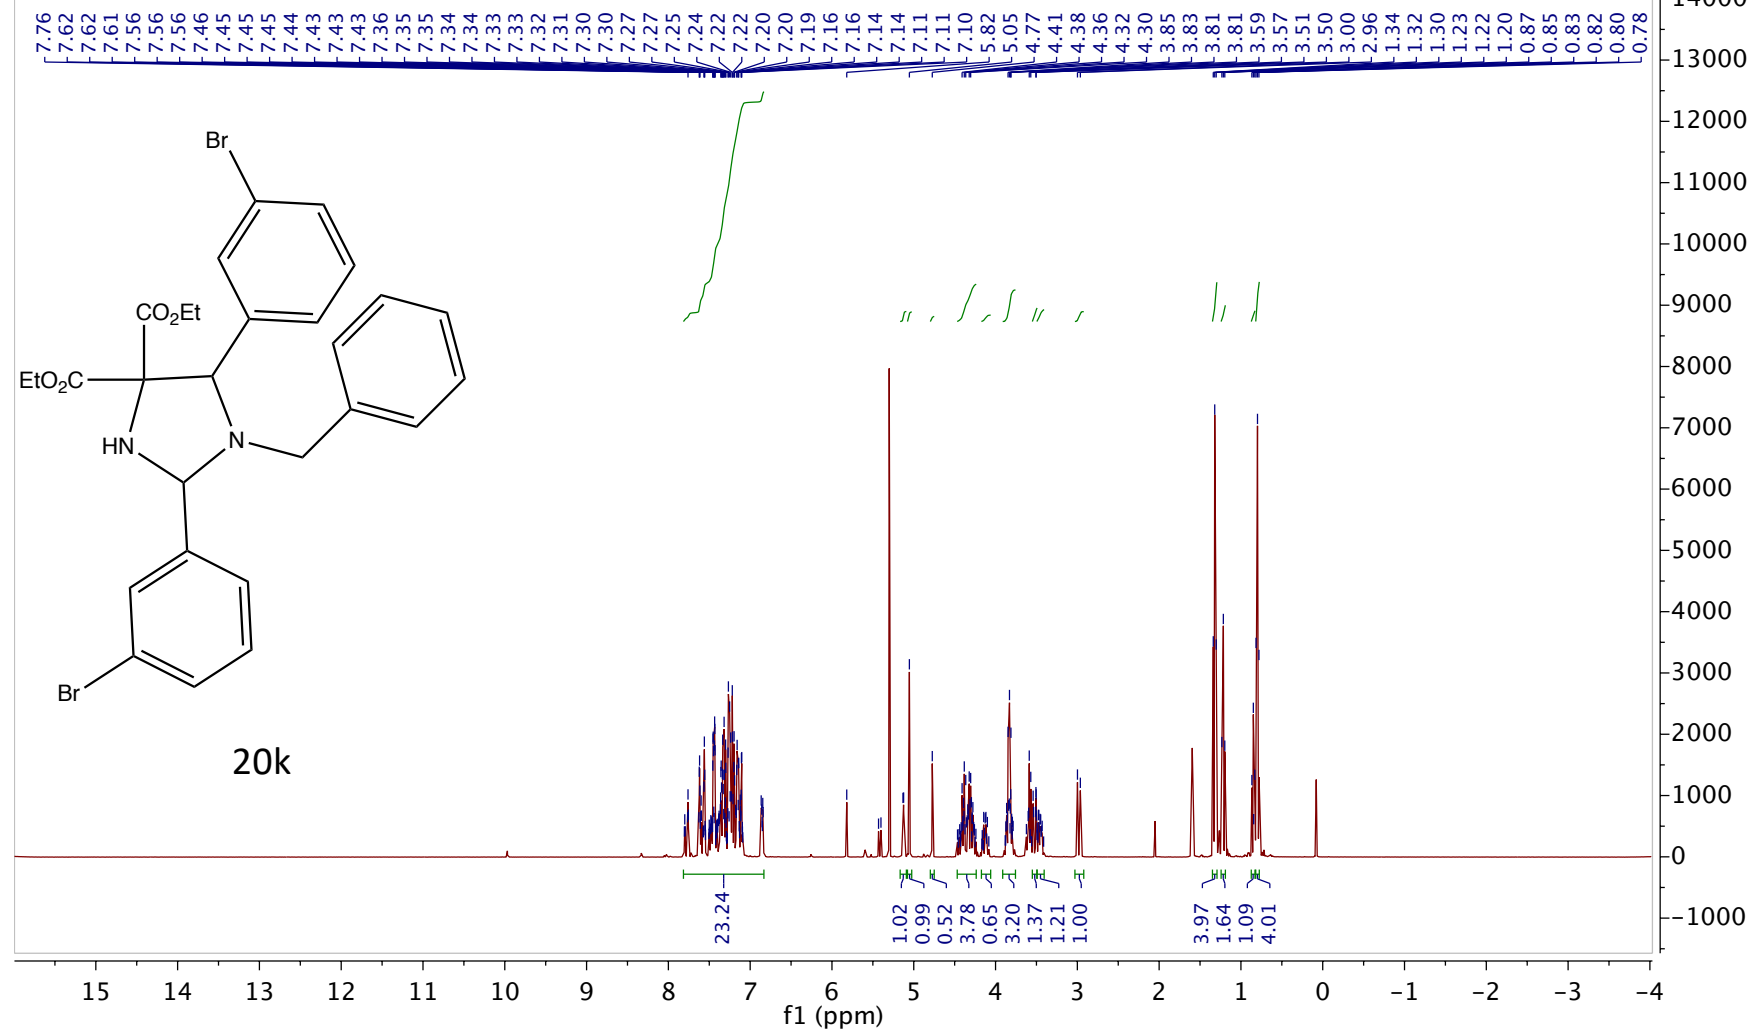

Jan25-2020-14-LS626(P) B11-C8.4.fid  
Instrument AVH400  
Chemist Liban Saney  
Group MGM  
Project Account Code liban.saney@ccc.ox.ac.uk  
c13acq\_512.crl CDCl3 {C:\NMR} mgmgrp 14

$^{13}\text{C}$  NMR (101 MHz  $\text{CDCl}_3$ )

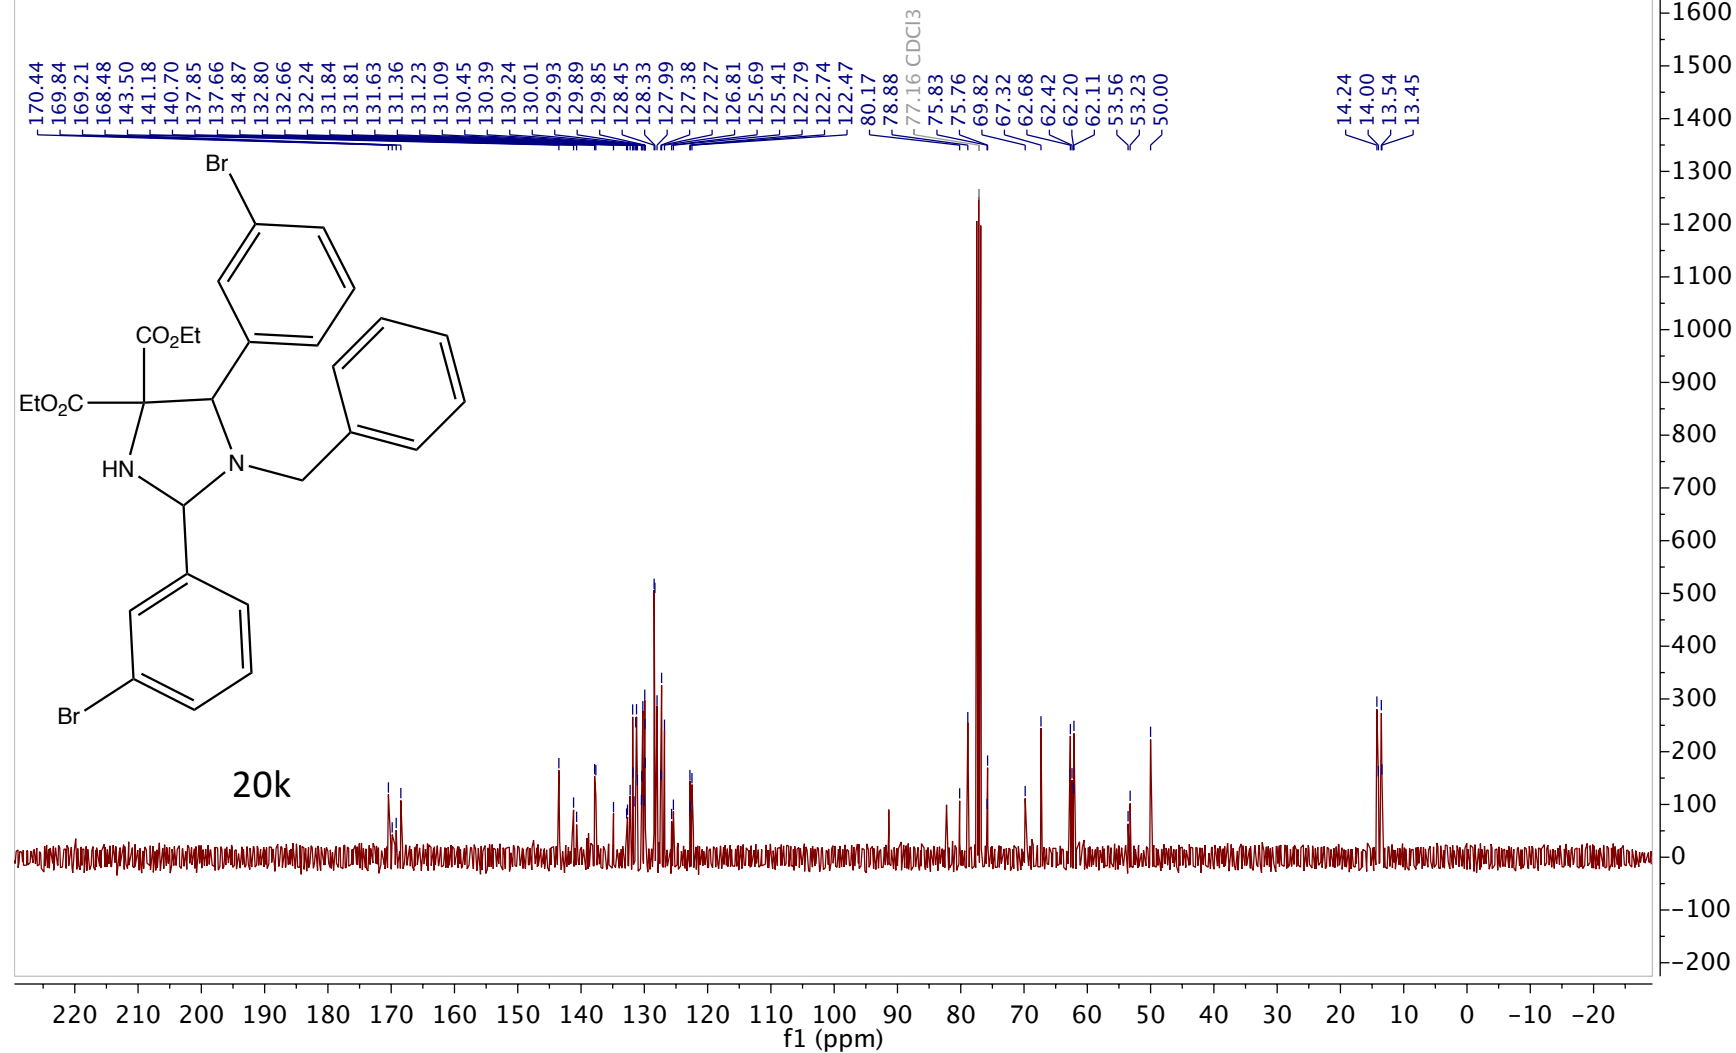

Jan30-2020-1-LS631(P) C3-D1.1.fid  
Instrument AVF400  
Chemist Liban Saney  
Group MGM  
Project Account Code DM7300  
h1acq.crl CDCl3 {C:\NMR} mgmgrp 1

<sup>1</sup>H NMR (400 MHz CDCl<sub>3</sub>)

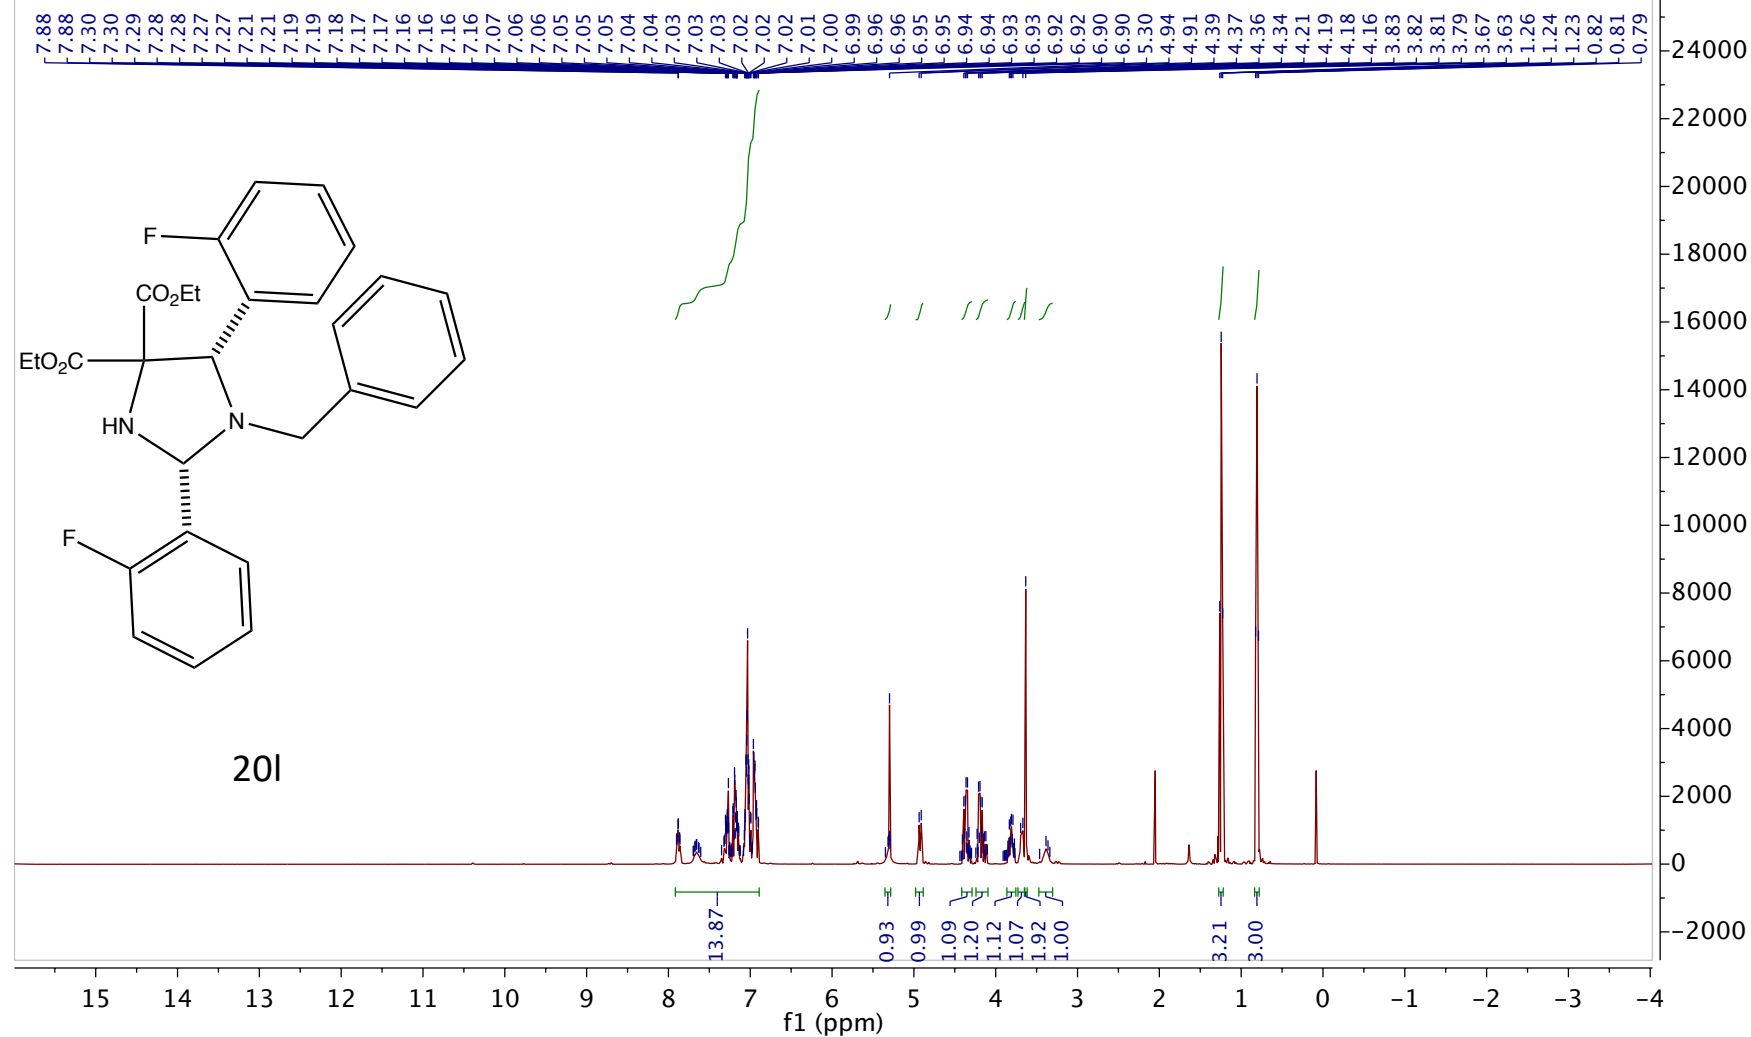

Jan30-2020-1-LS631(P) C3-D1.4.fid  
Instrument AVF400  
Chemist Liban Saney  
Group MGM  
Project Account Code DM7300  
c13acq\_512.crl CDCl3 {C:\NMR} mgmgrp 1

$^{13}\text{C}$  NMR (101 MHz  $\text{CDCl}_3$ )

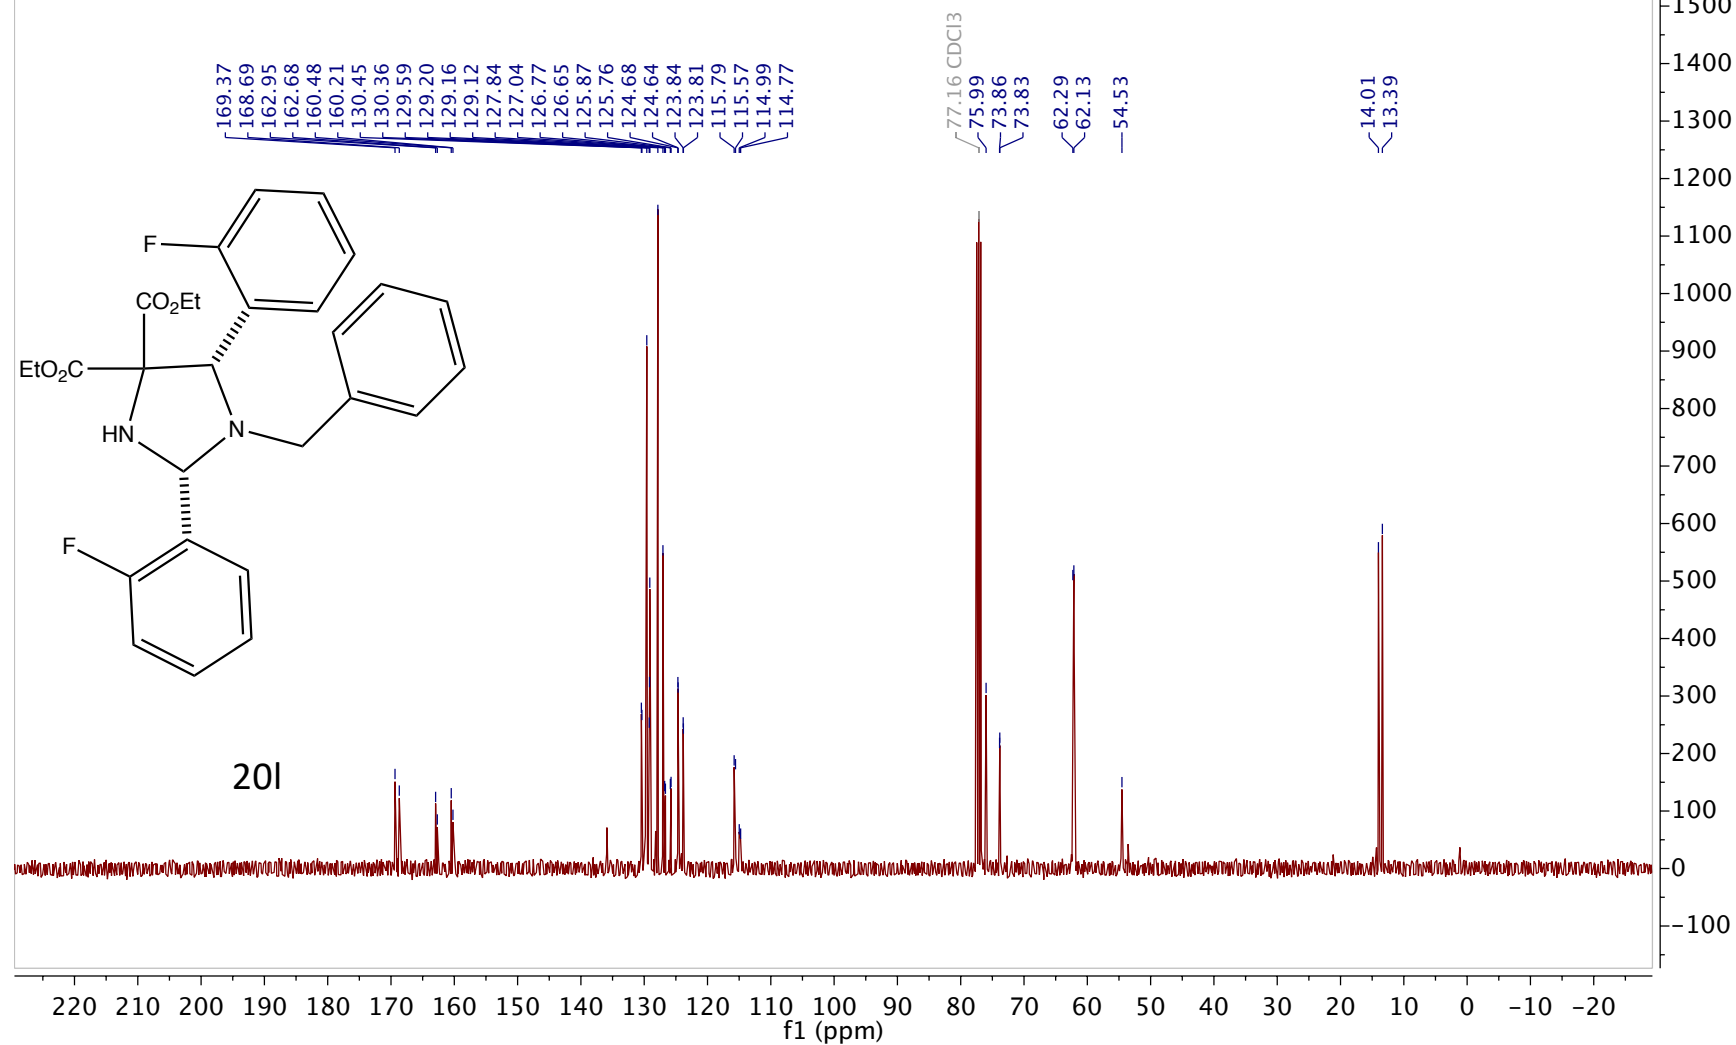

Jan30-2020-1-LS631(P) C3-D1.6.fid  
Instrument AVF400  
Chemist Liban Saney  
Group MGM  
Project Account Code DM7300  
f19acq\_256.crl CDCl3 {C:\NMR} mgmgrp 1

$^{19}\text{F}$  NMR (377 MHz  $\text{CDCl}_3$ )

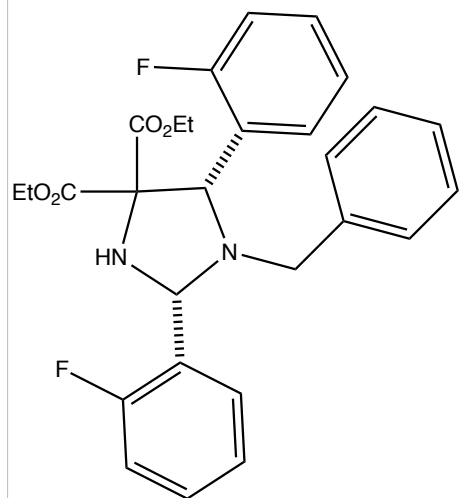

20I

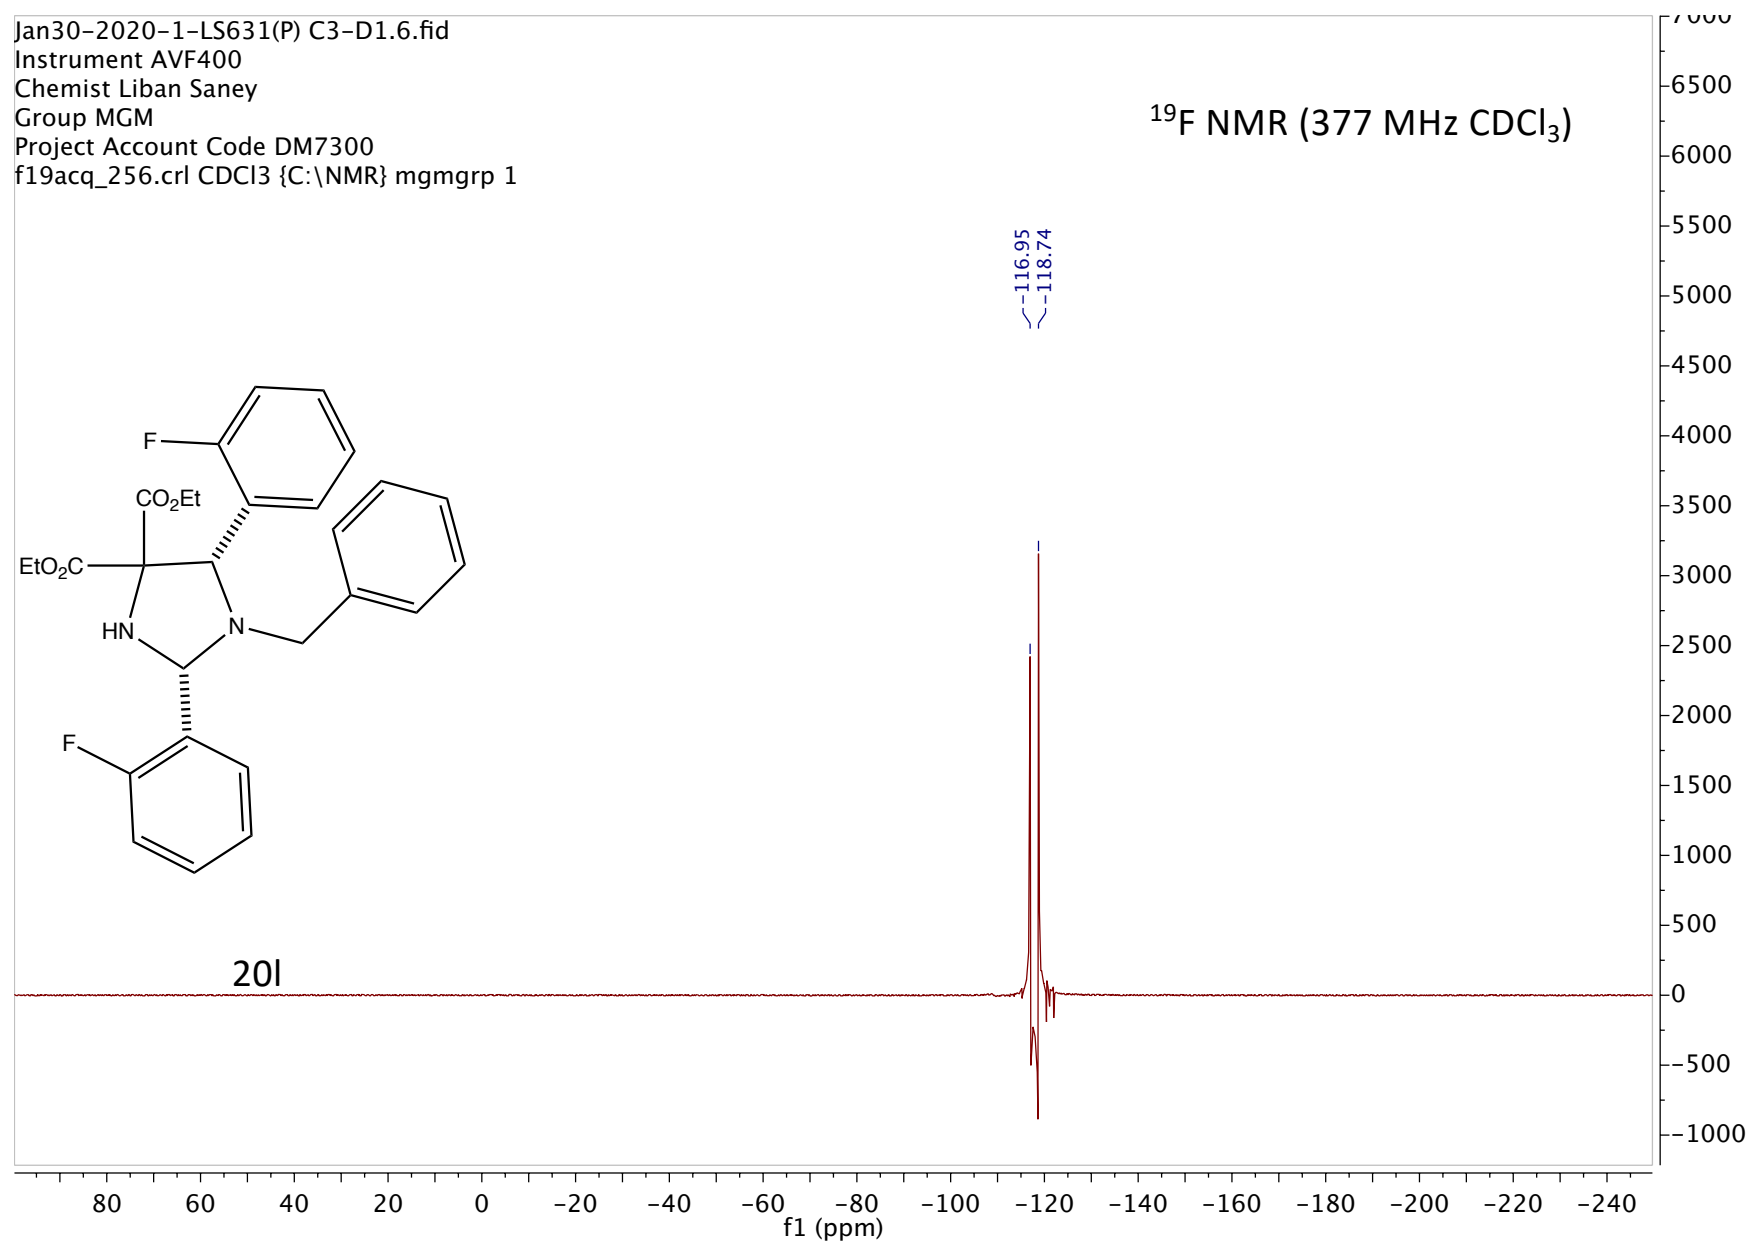



Jul22-2018-59-LS170(P) B4-B11 Fraction.1.fid  
Instrument AVH400  
Chemist Liban Saney  
Group MGM  
Project Account Code DM7300  
h1acq.crl CDCl3 {C:\NMR} mgmgrp 59

<sup>1</sup>H NMR (400 MHz CDCl<sub>3</sub>)

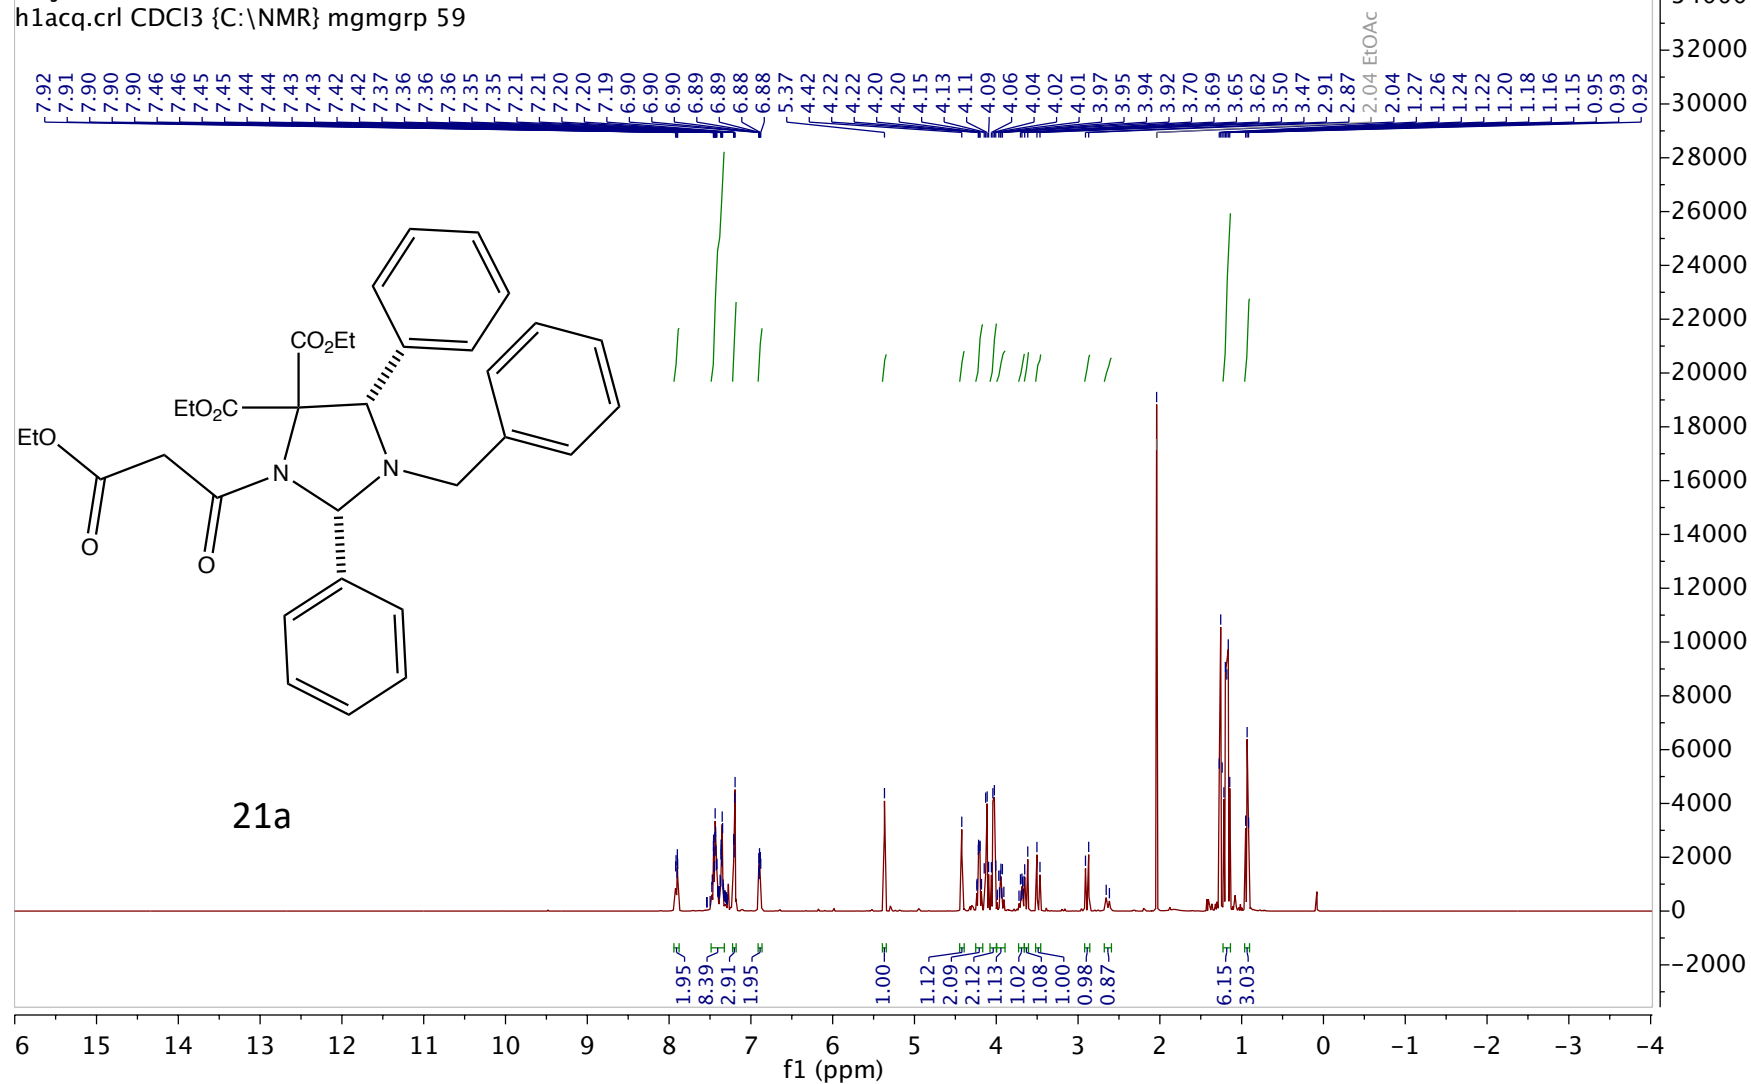

Jul22-2018-59-LS170(P) B4-B11 Fraction.4.fid  
Instrument AVH400  
Chemist Liban Saney  
Group MGM  
Project Account Code DM7300  
c13acq\_512.crl CDCl3 {C:\NMR} mgmgrp 59

$^{13}\text{C}$  NMR (101 MHz  $\text{CDCl}_3$ )

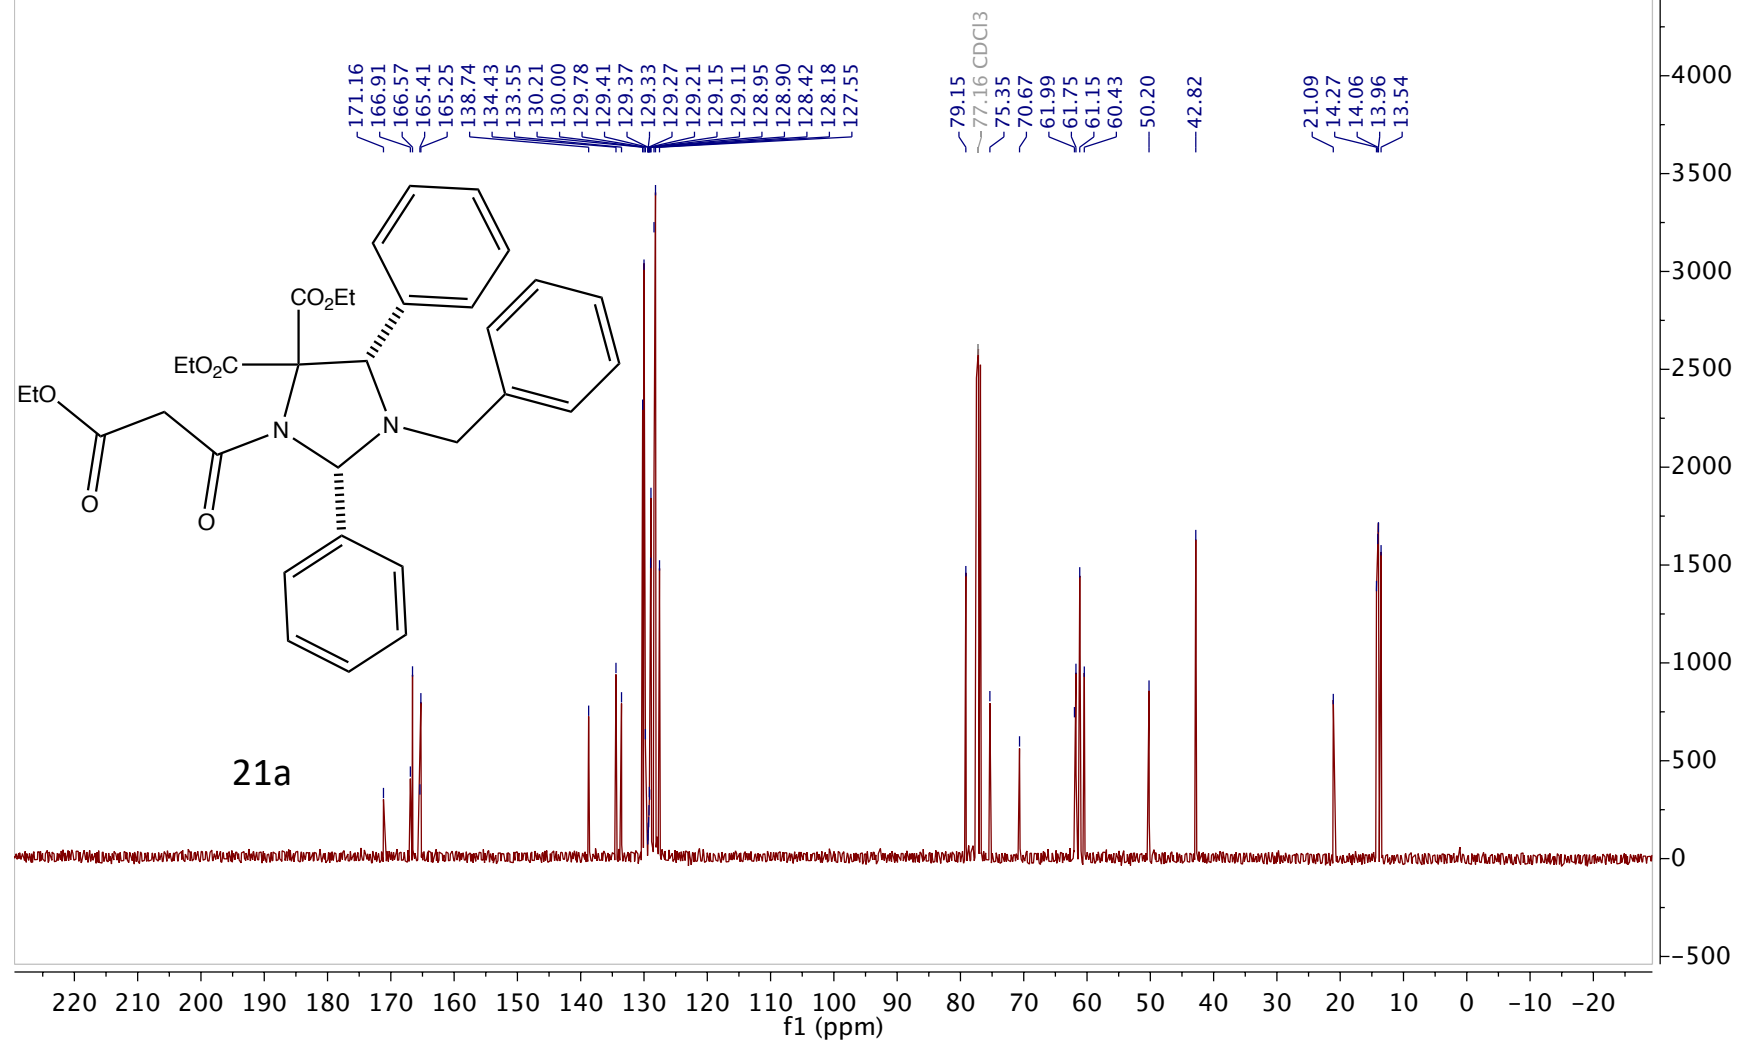

Mar24-2019-60-LS350(P) A10-C2.1.fid  
Instrument AVF400  
Chemist Liban Saney  
Group MGM  
Project Account Code DM7300  
h1acq.crl CDCl3 {C:\NMR} mgmgrp 60

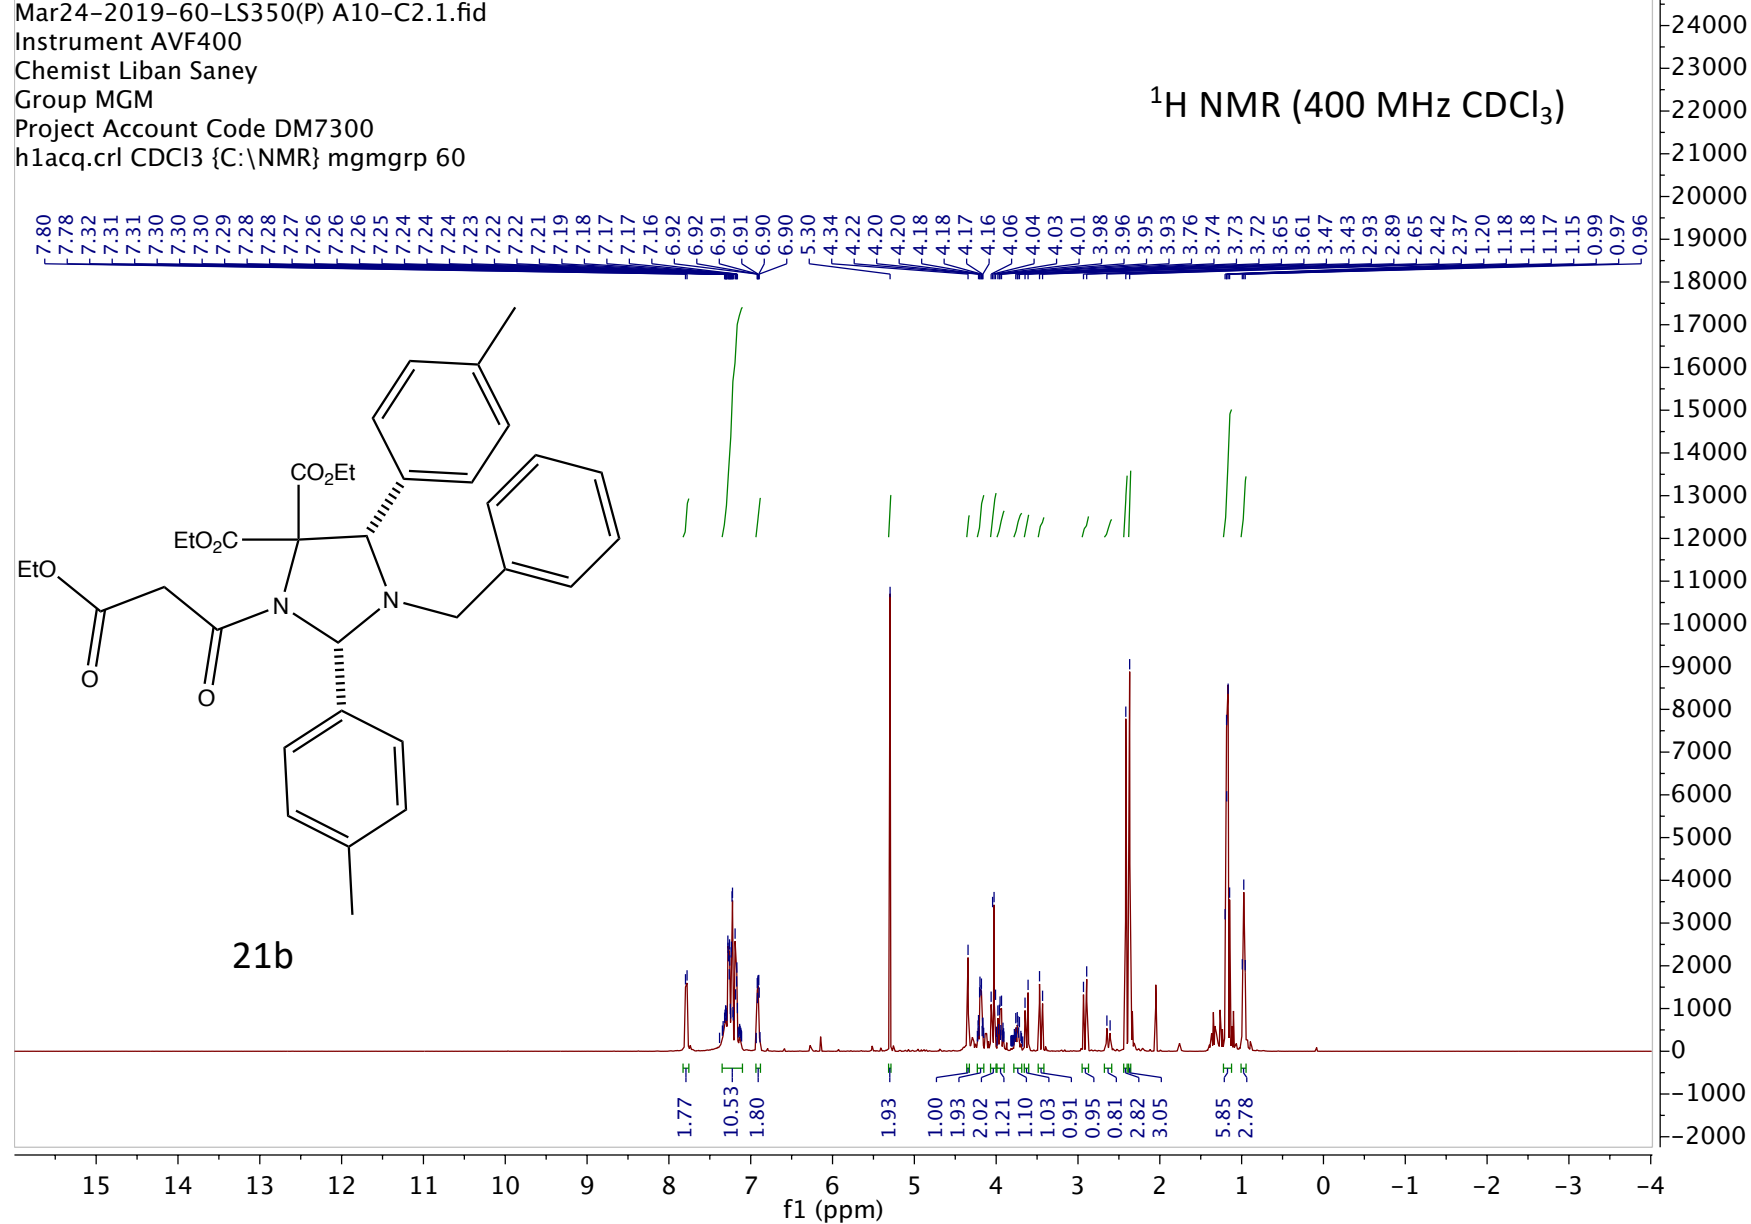

Mar24-2019-60-LS350(P) A10-C2.4.fid  
Instrument AVF400  
Chemist Liban Saney  
Group MGM  
Project Account Code DM7300  
c13acq\_512.crl CDCl3 {C:\NMR} mgmgrp 60

<sup>13</sup>C NMR (101 MHz CDCl<sub>3</sub>)

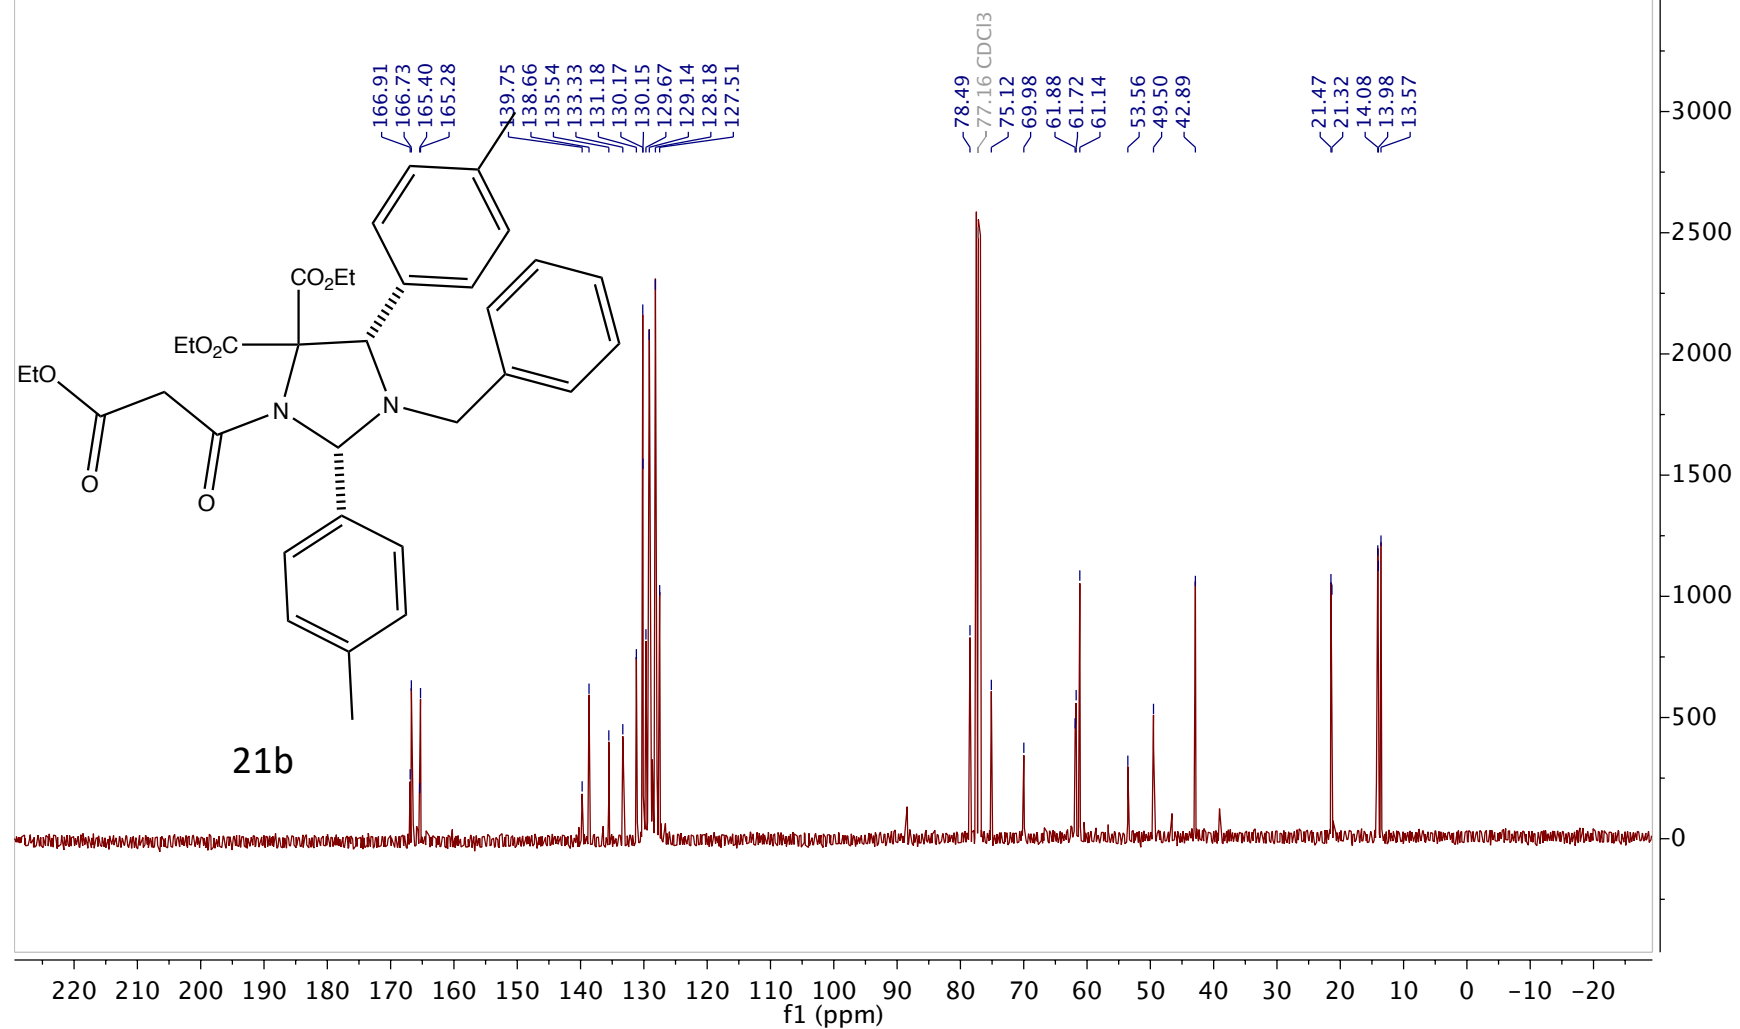

Mar22-2019-52-LS348(P) C6-C12.1.fid  
Instrument AVF400  
Chemist Liban Saney  
Group MGM  
Project Account Code DM7300  
h1acq.crl CDCl3 {C:\NMR} mgmgrp 52

<sup>1</sup>H NMR (400 MHz CDCl<sub>3</sub>)

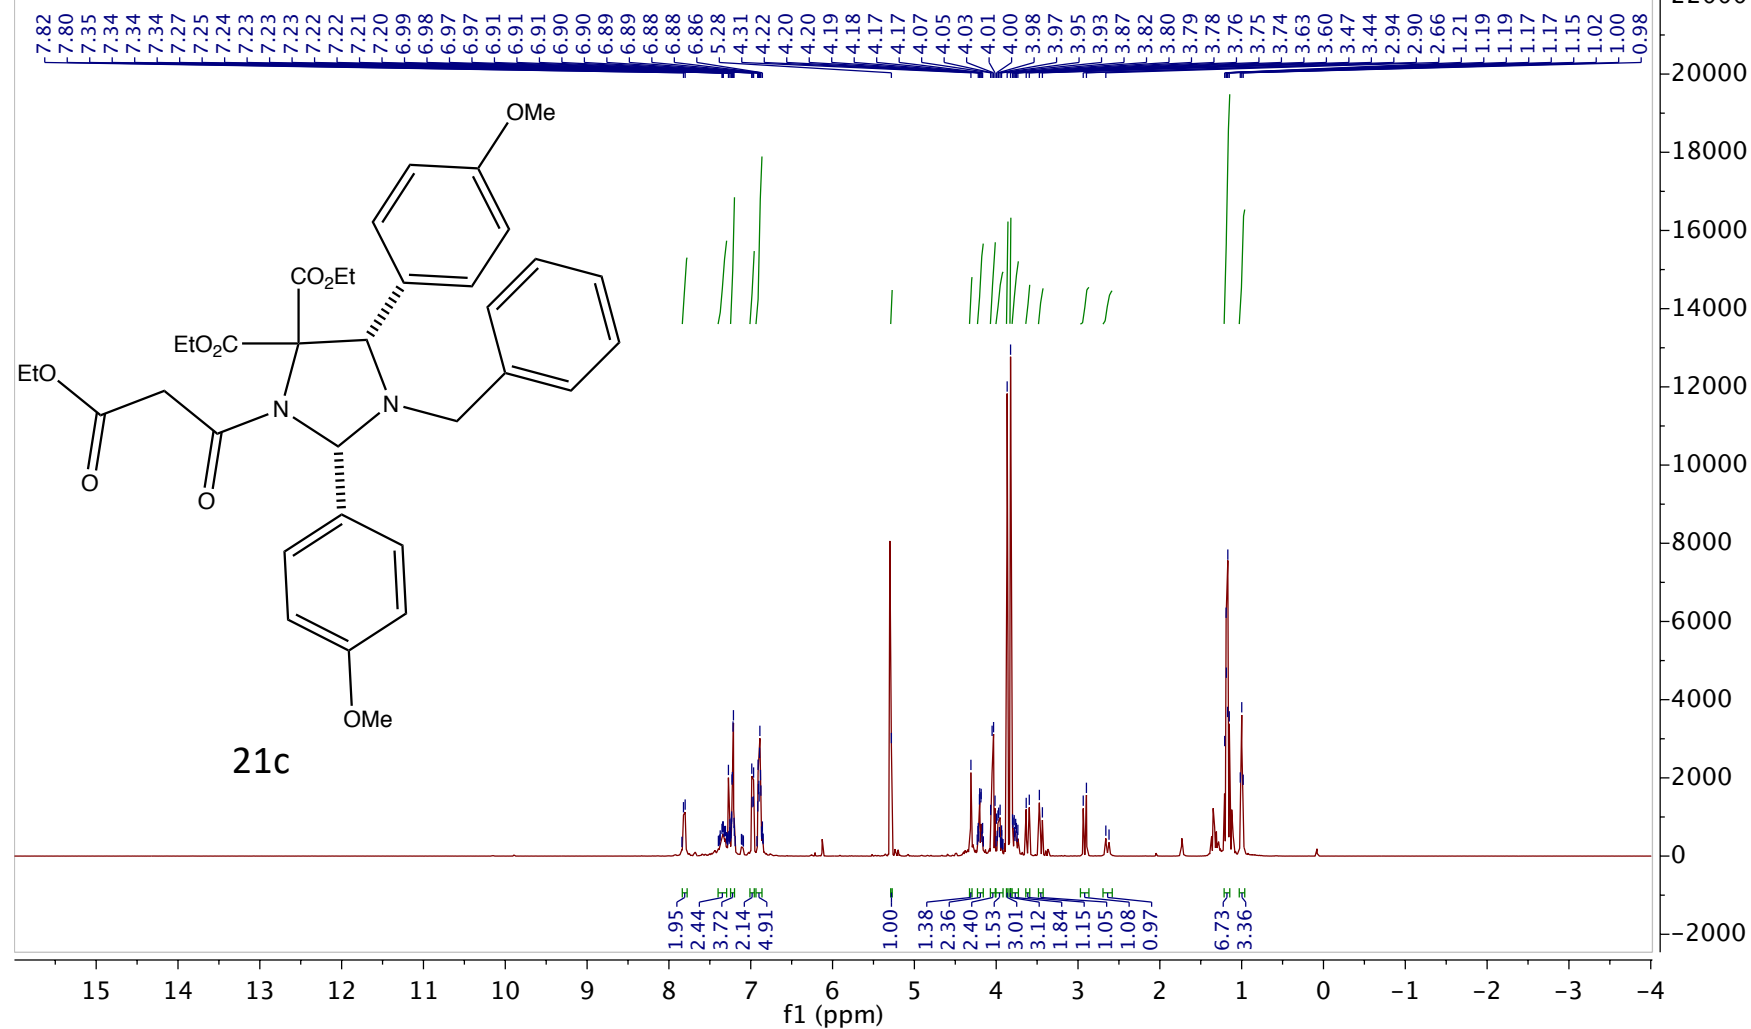

Mar22-2019-52-LS348(P) C6-C12.4.fid  
Instrument AVF400  
Chemist Liban Saney  
Group MGM  
Project Account Code DM7300  
c13acq\_512.crl CDCl3 {C:\NMR} mgmgrp 52

<sup>13</sup>C NMR (101 MHz CDCl<sub>3</sub>)

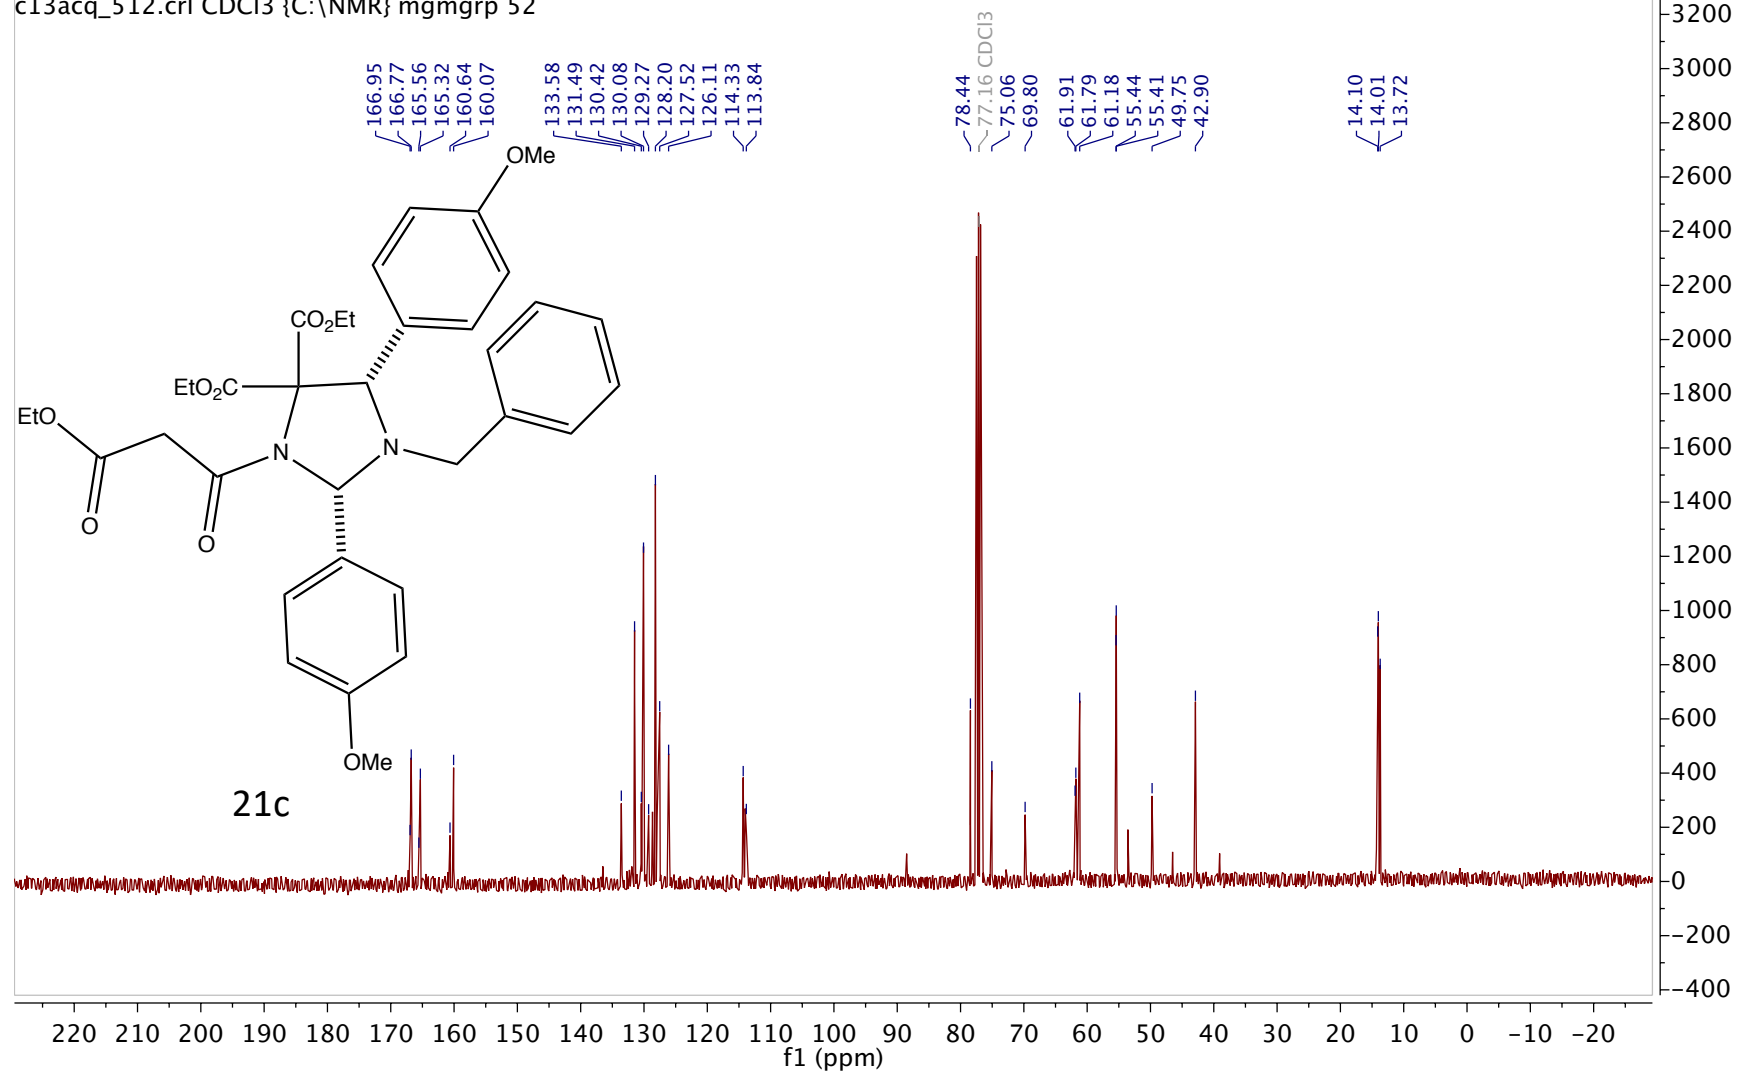

Mar29-2019-55-LS357(P) A12-C4.1.fid  
Instrument AVF400  
Chemist Liban Saney  
Group MGM  
Project Account Code DM7300  
h1acq.crl CDCl3 {C:\NMR} mgmgrp 55

<sup>1</sup>H NMR (400 MHz CDCl<sub>3</sub>)

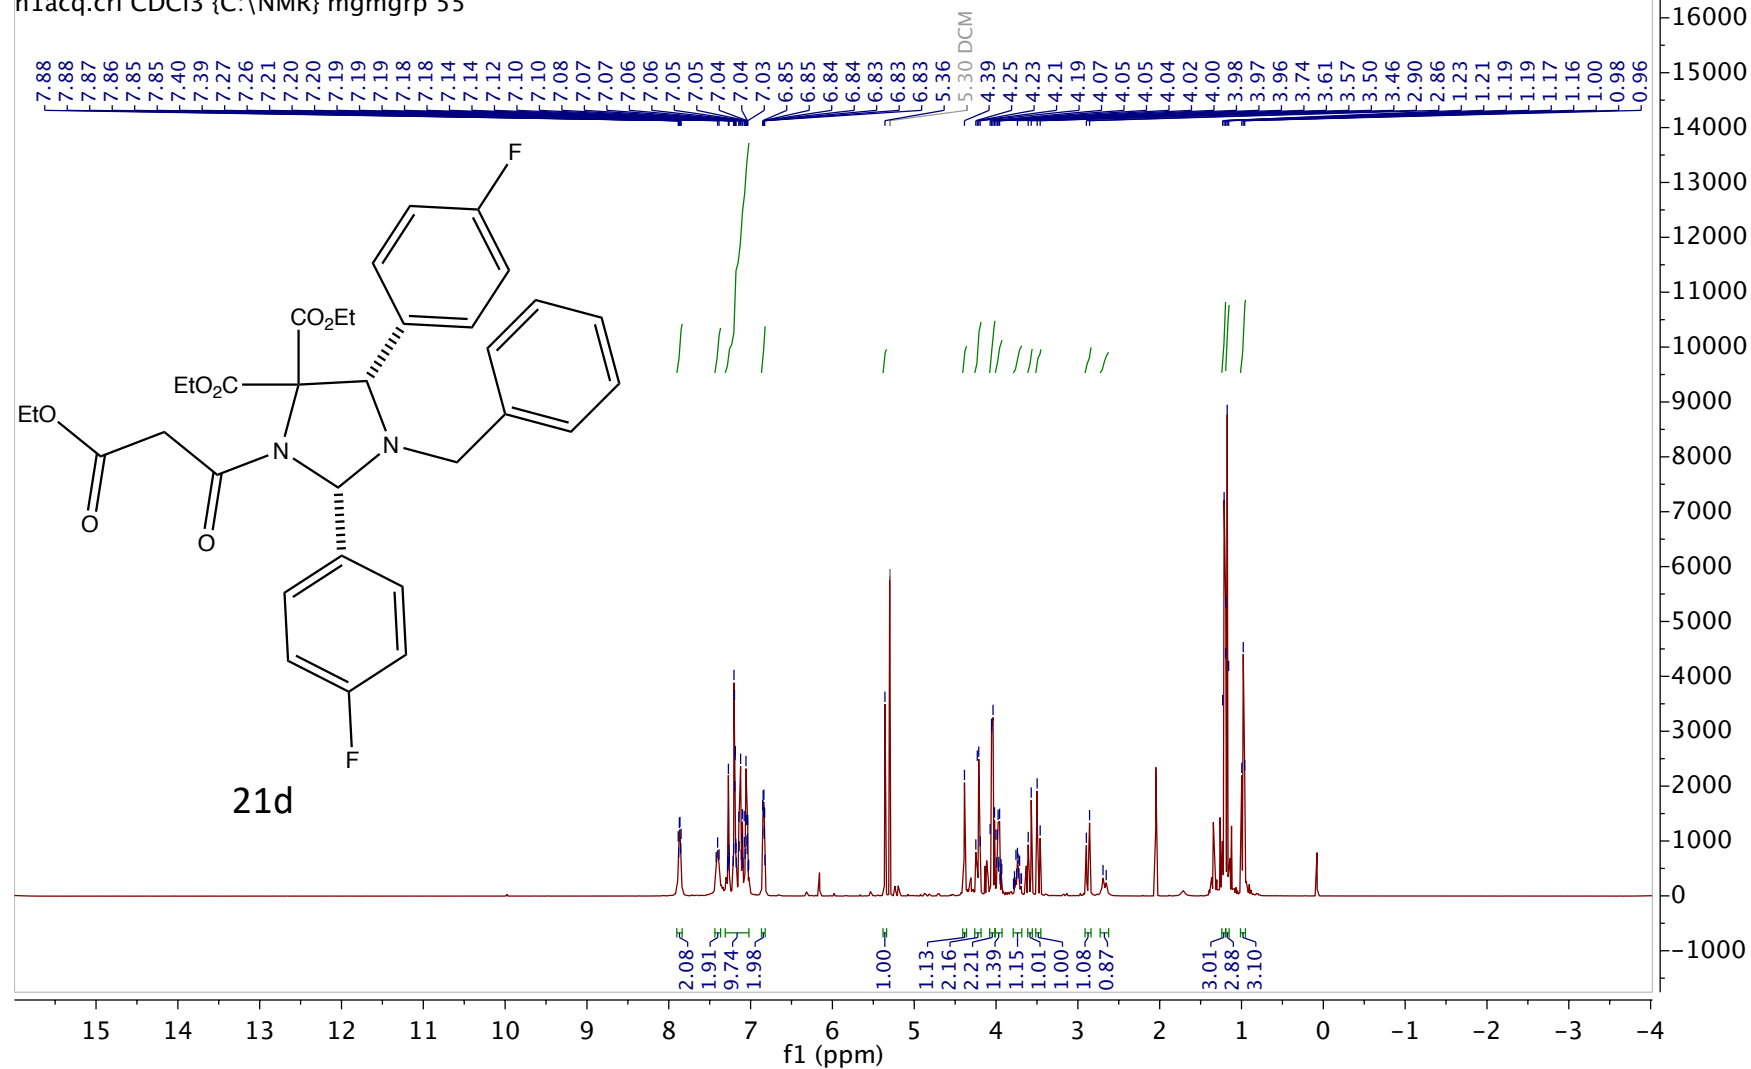

Mar29-2019-55-LS357(P) A12-C4.4.fid  
Instrument AVF400  
Chemist Liban Saney  
Group MGM  
Project Account Code DM7300  
c13acq\_512.crl CDCl3 {C:\NMR} mgmgrp 55

<sup>13</sup>C NMR (101 MHz CDCl<sub>3</sub>)

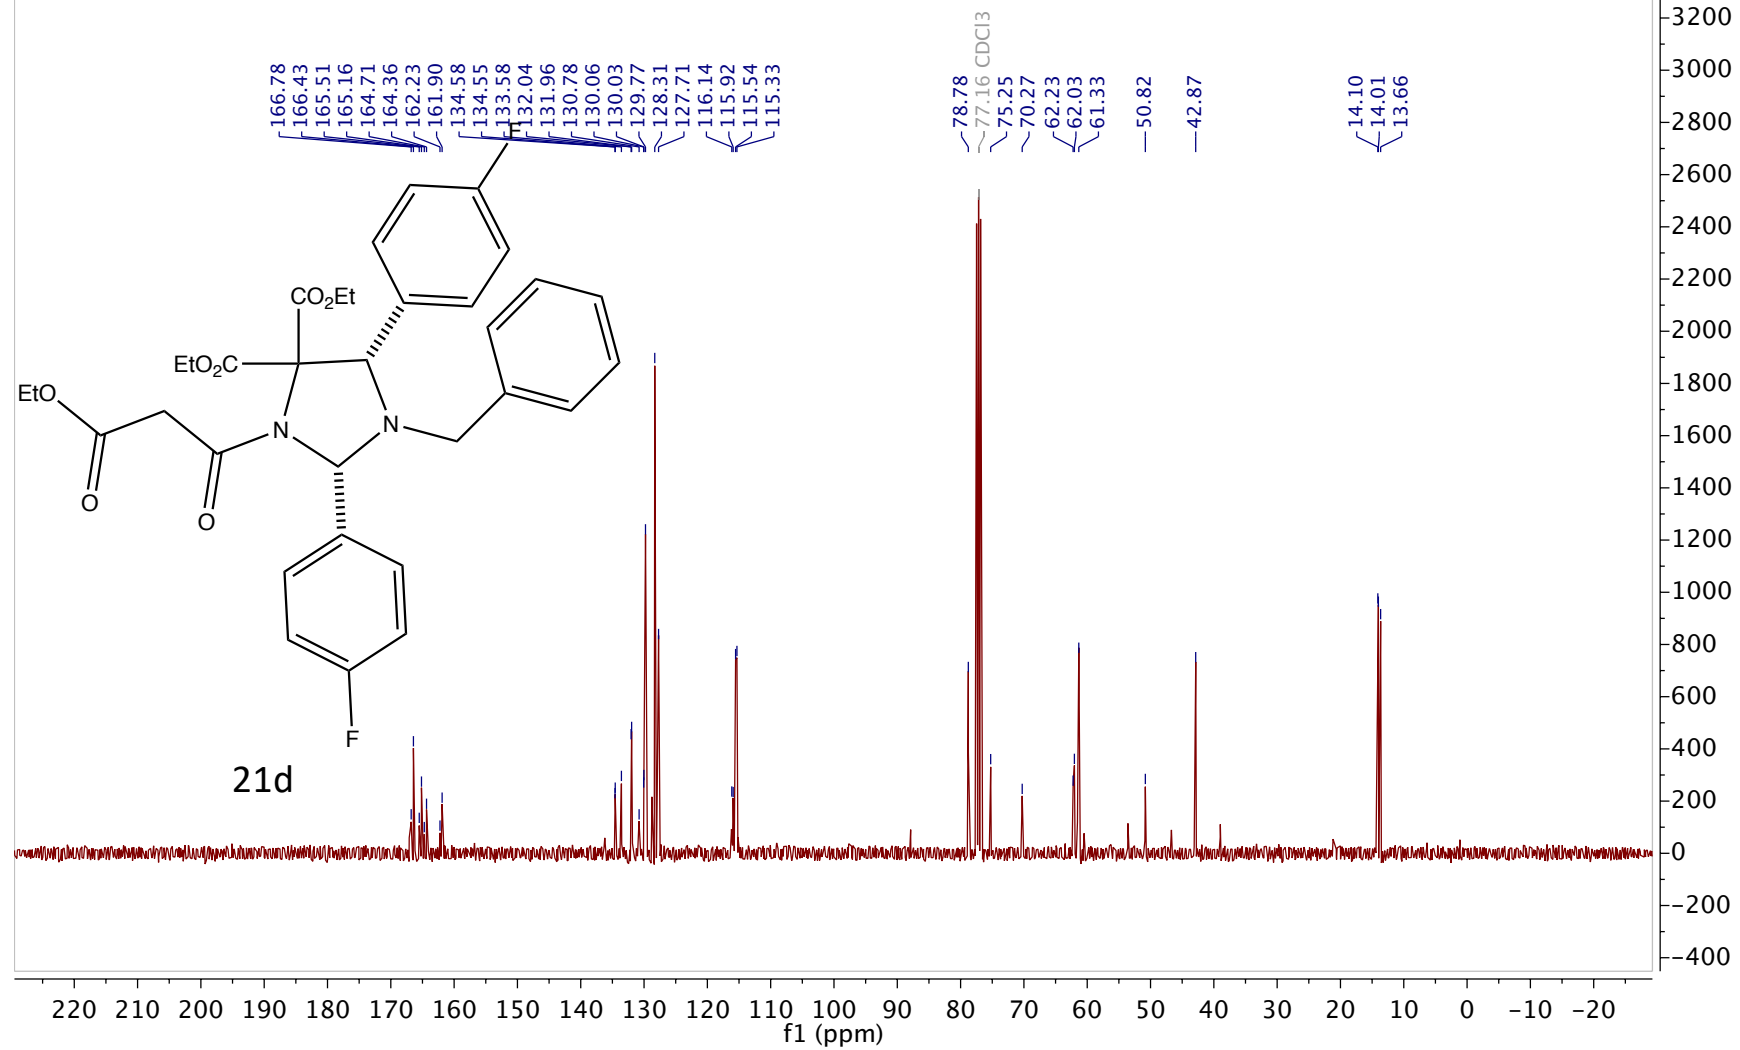



Mar29-2019-55-LS357(P) A12-C4.6.fid  
Instrument AVF400  
Chemist Liban Saney  
Group MGM  
Project Account Code DM7300  
f19acq.crl CDCl3 {C:\NMR} mgmgrp 55

$^{19}\text{F}$  NMR (377 MHz  $\text{CDCl}_3$ )

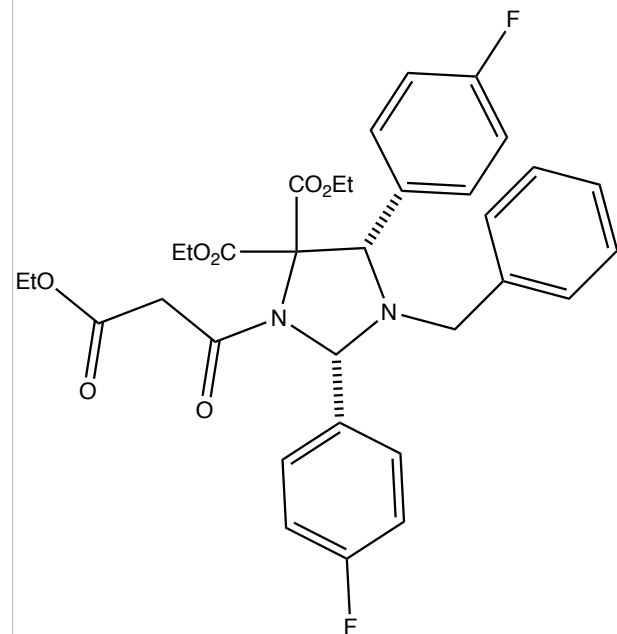

21d

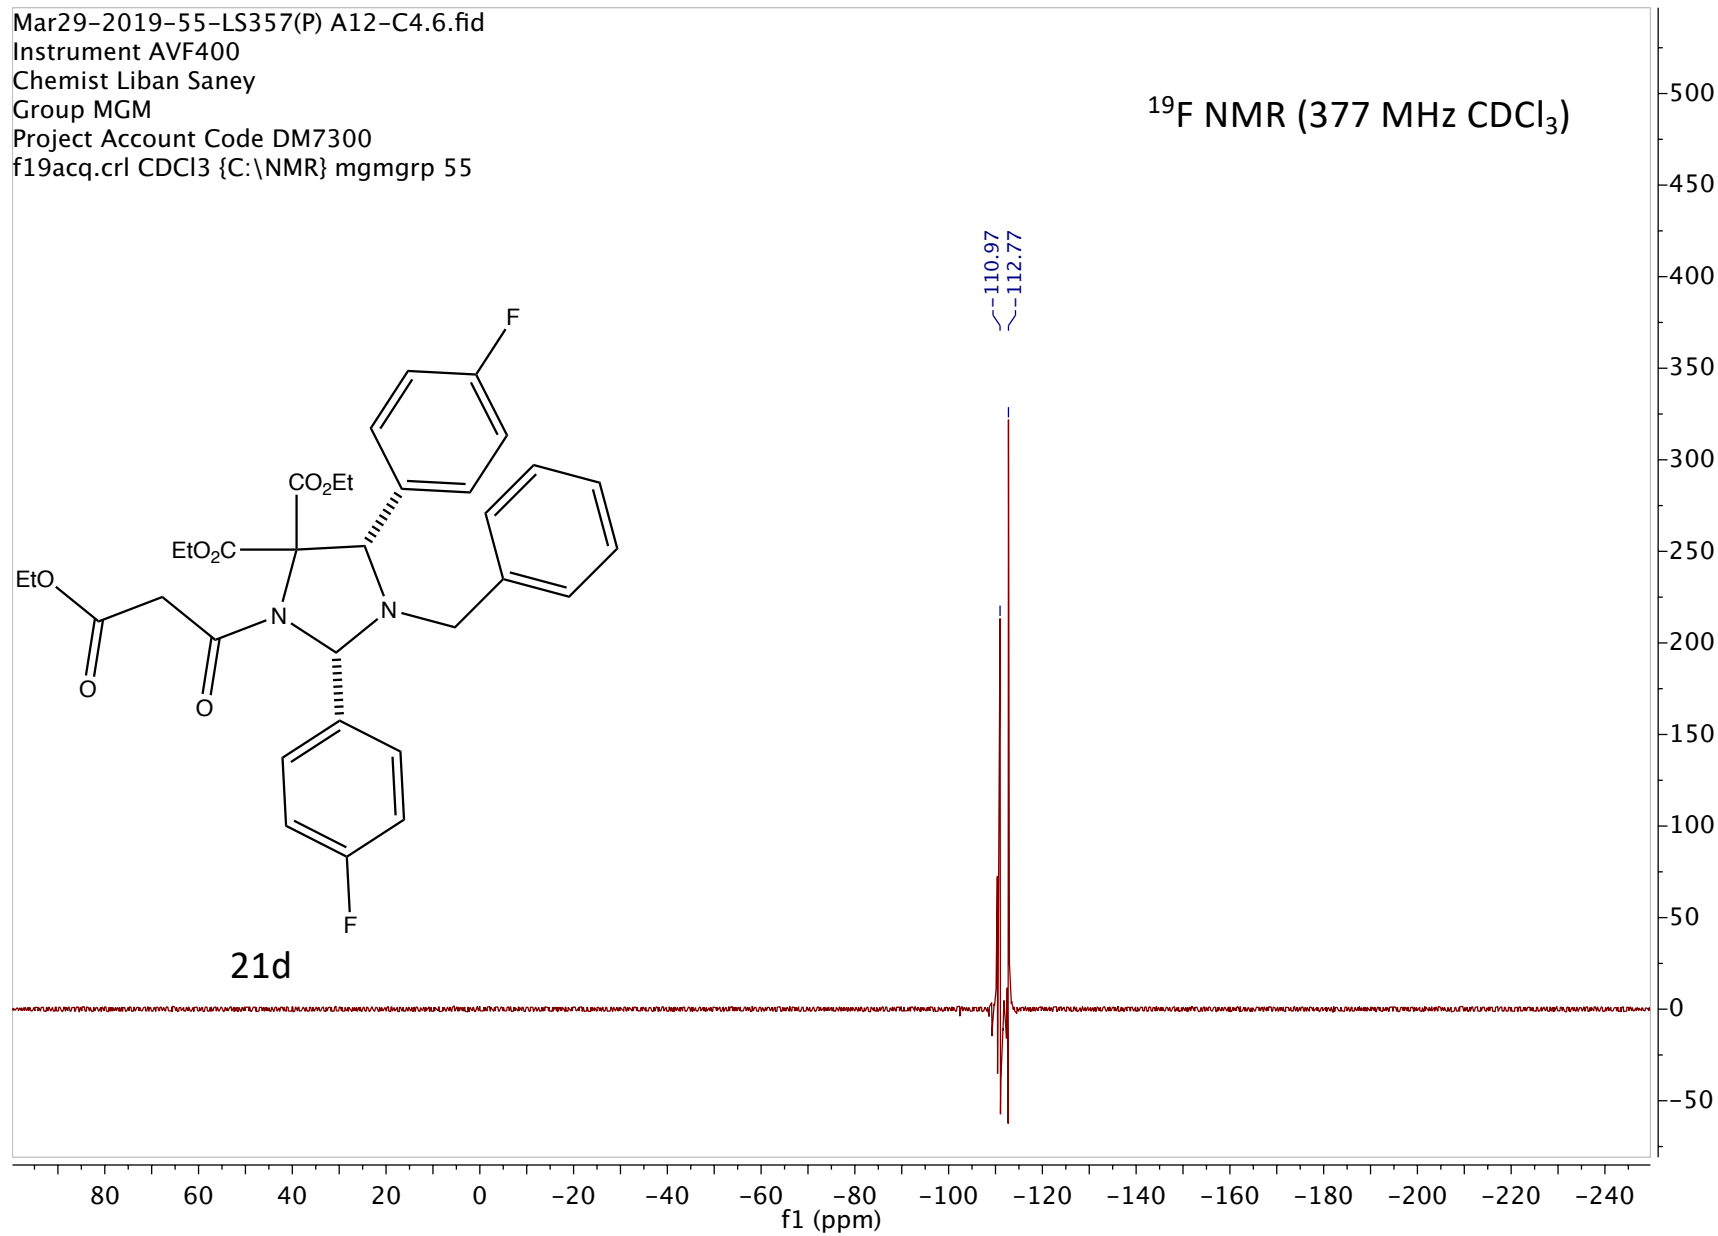

Jan12-2020-1-LS609(P) B2-B10.1.fid  
Instrument AVF400  
Chemist Liban Saney  
Group MGM  
Project Account Code DM7300  
h1acq.crl CDCl3 {C:\NMR} mgmgrp 1

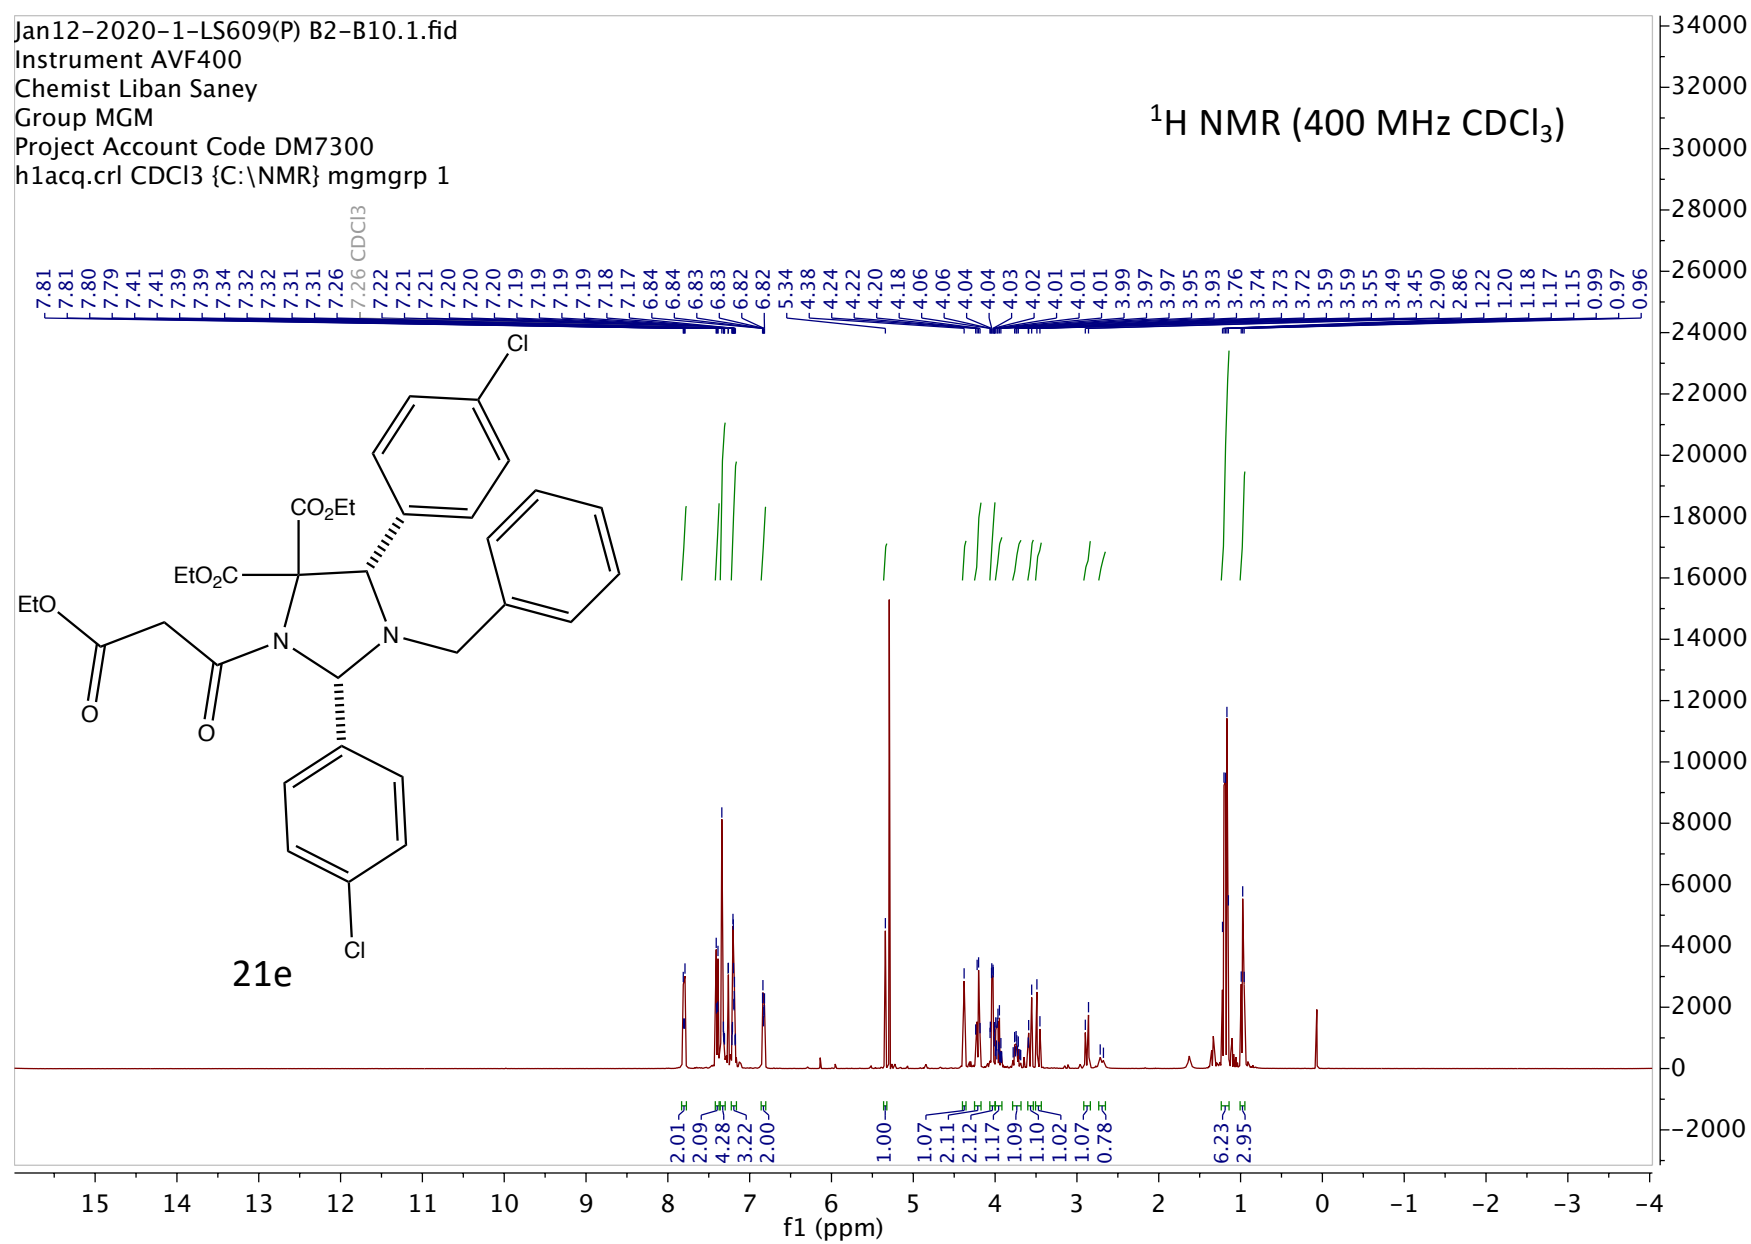

Jan12-2020-1-LS609(P) B2-B10.4.fid  
Instrument AVF400  
Chemist Liban Saney  
Group MGM  
Project Account Code DM7300  
c13acq\_512.crl CDCl3 {C:\NMR} mgmgrp 1

$^{13}\text{C}$  NMR (101 MHz  $\text{CDCl}_3$ )

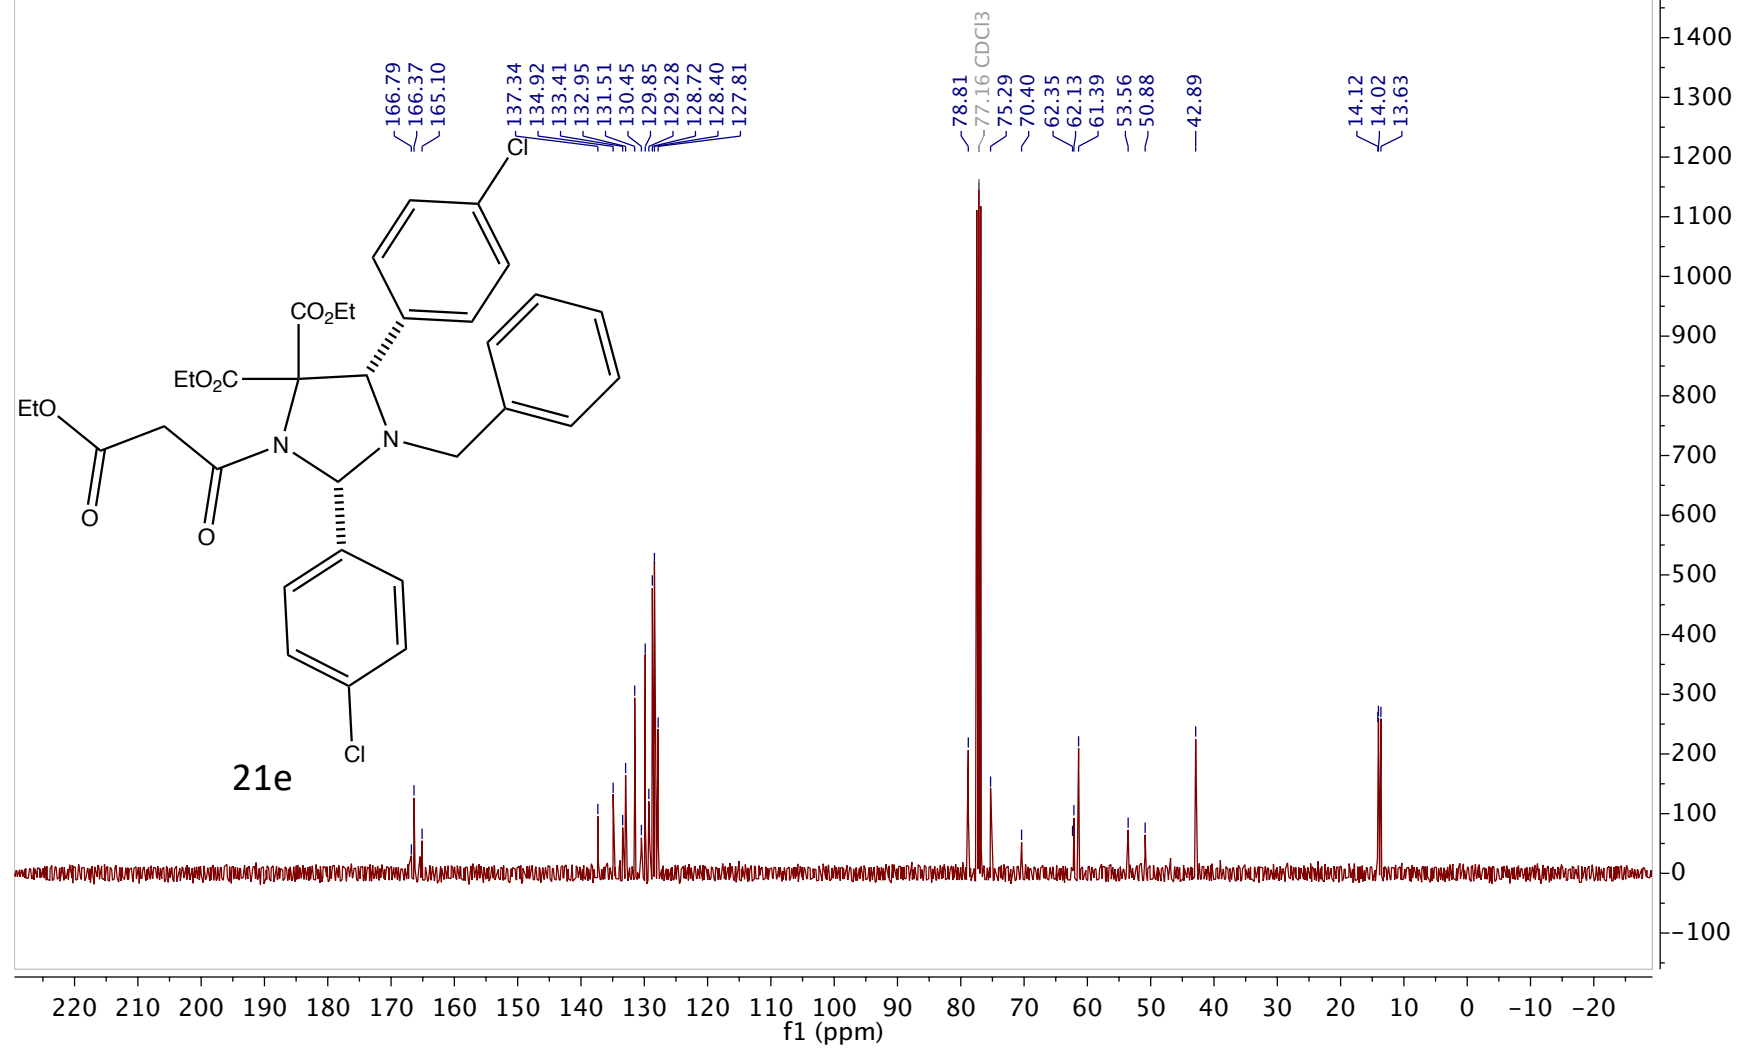

Apr05-2019-57-LS366(P) A12-C4.1.fid  
Instrument AVF400  
Chemist Liban Saney  
Group MGM  
Project Account Code DM7300  
h1acq.crl CDCl3 {C:\NMR} mgmgrp 57

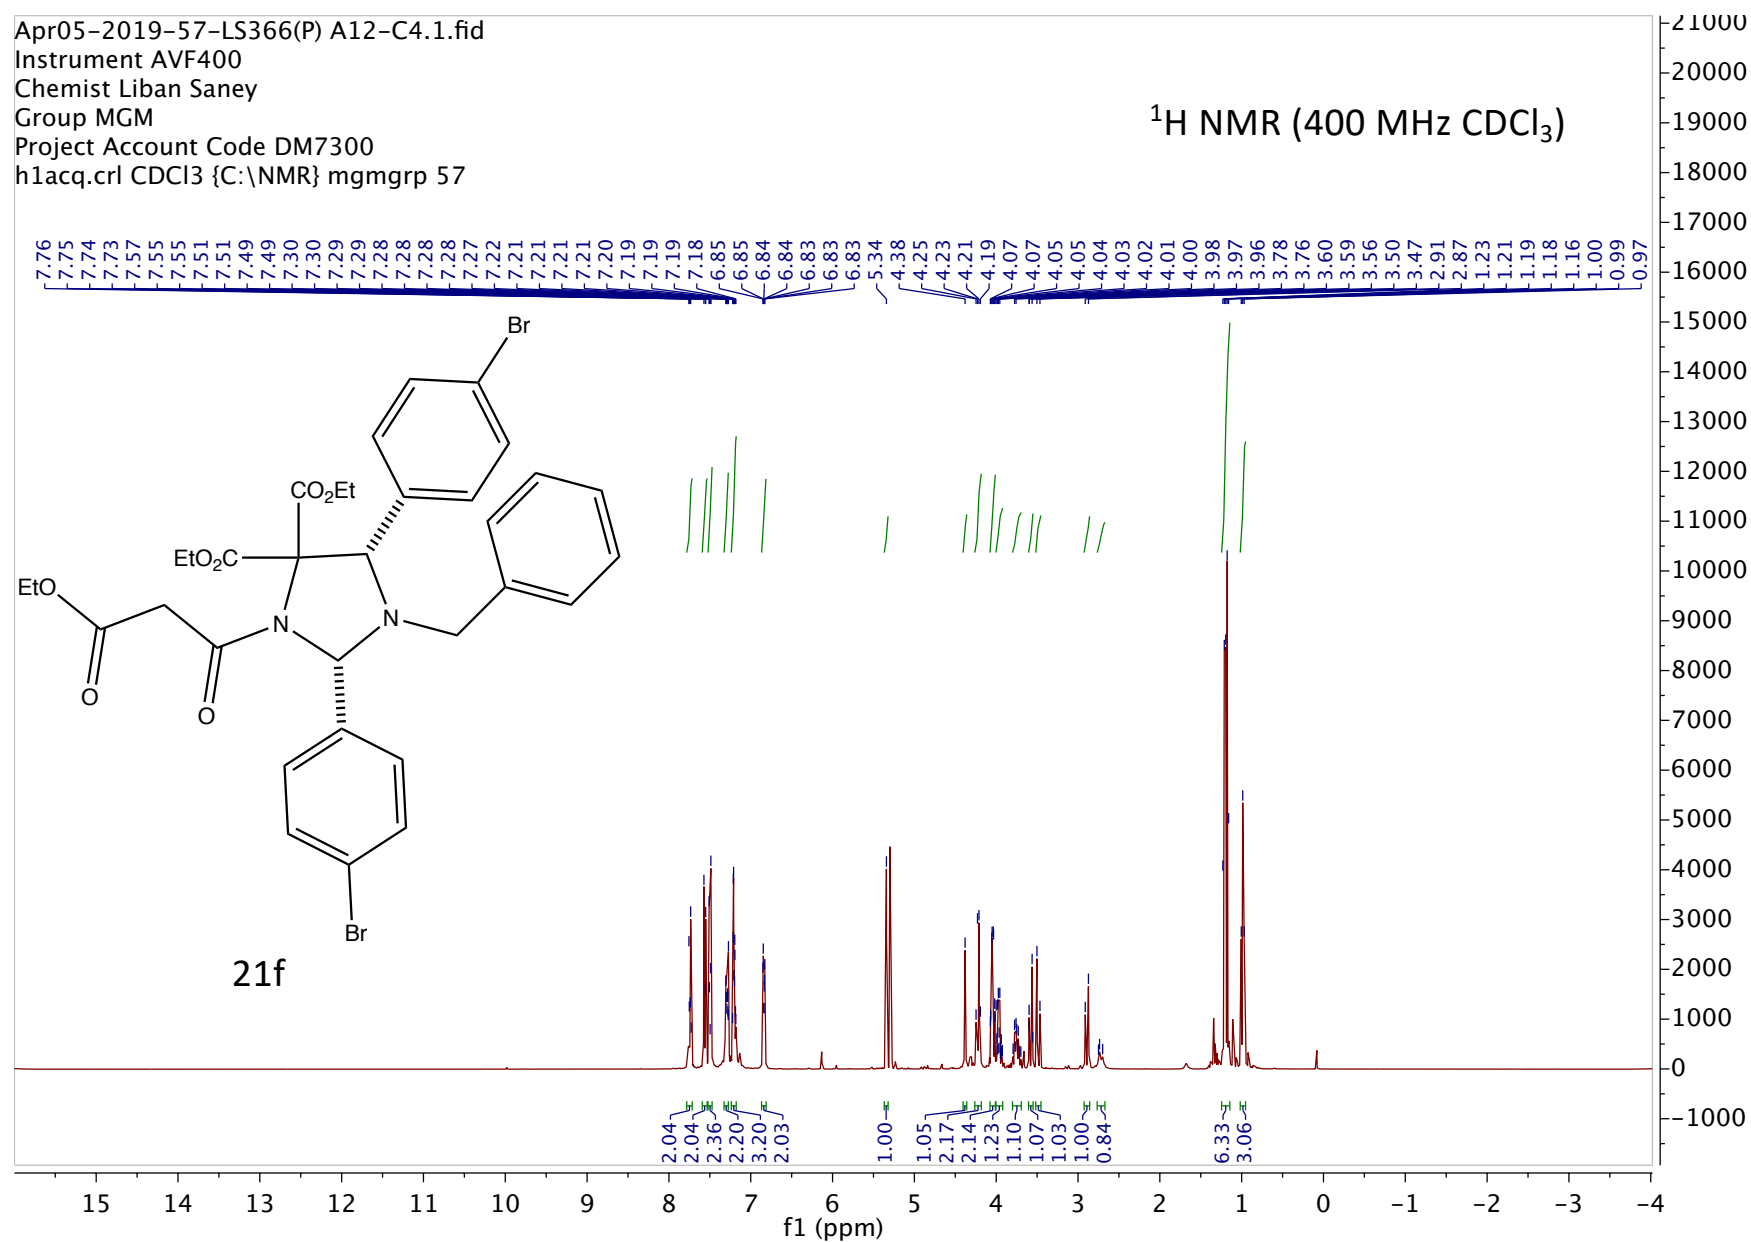

Apr05-2019-57-LS366(P) A12-C4.4.fid  
Instrument AVF400  
Chemist Liban Saney  
Group MGM  
Project Account Code DM7300  
c13acq\_512.crl CDCl3 {C:\NMR} mgmgrp 57

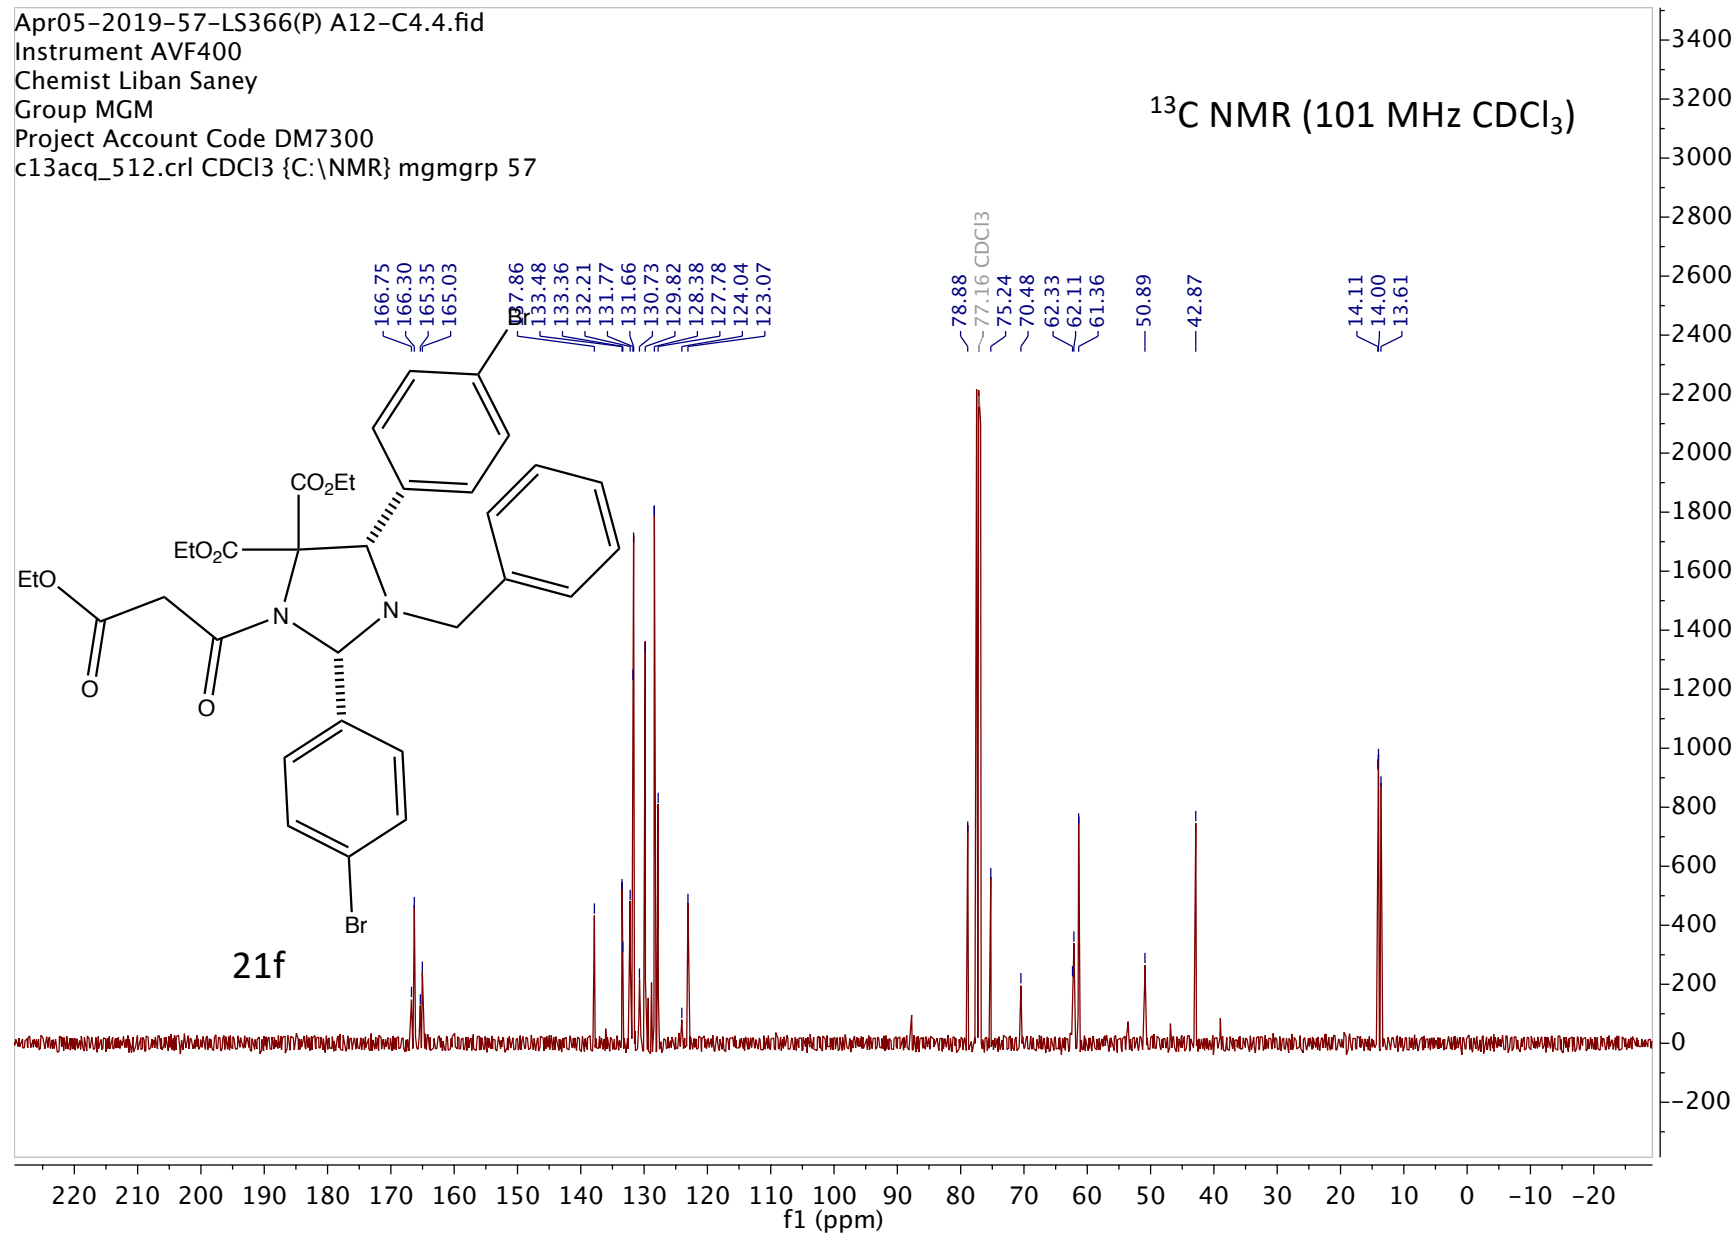

Jan14-2020-1-LS612(P) C10-D9.1.fid  
Instrument AVF400  
Chemist Liban Saney  
Group MGM  
Project Account Code DM7300  
h1acq.crl CDCl3 {C:\NMR} mgmgrp 1

<sup>1</sup>H NMR (400 MHz CDCl<sub>3</sub>)

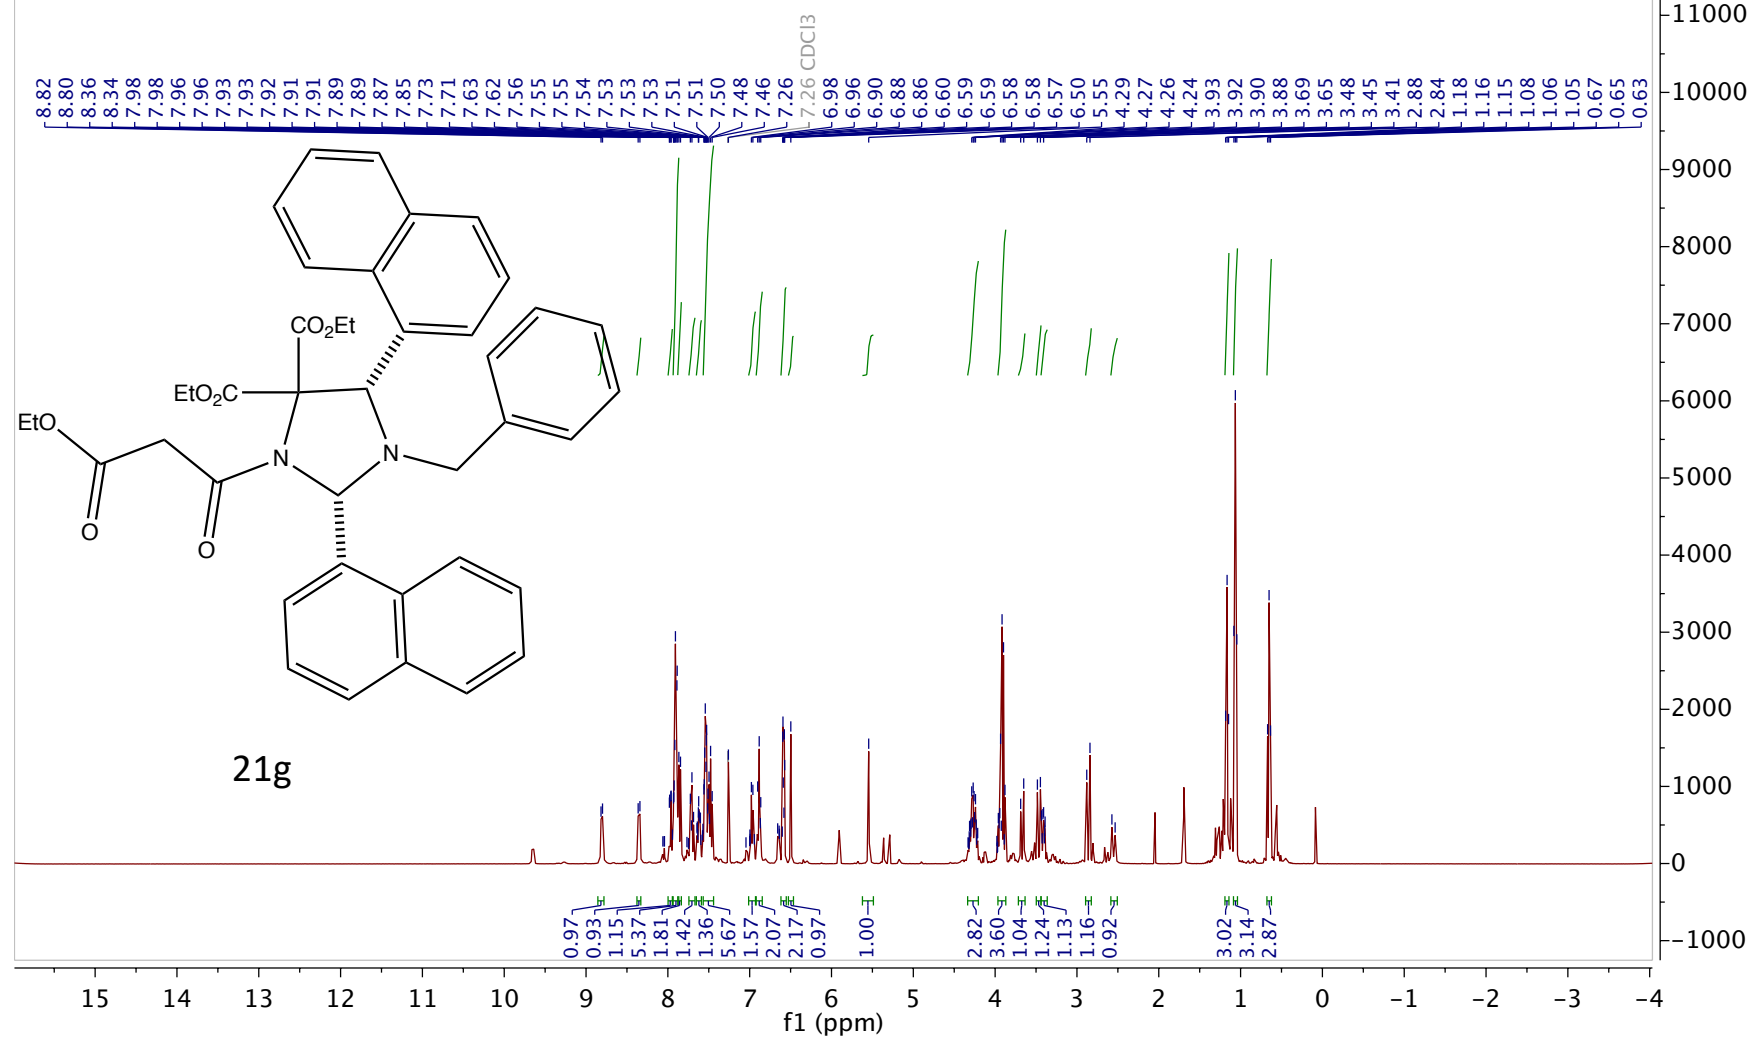

Jan14-2020-1-LS612(P) C10-D9.4.fid  
Instrument AVF400  
Chemist Liban Saney  
Group MGM  
Project Account Code DM7300  
c13acq\_512.crl CDCl3 {C:\NMR} mgmgrp 1

$^{13}\text{C}$  NMR (101 MHz  $\text{CDCl}_3$ )

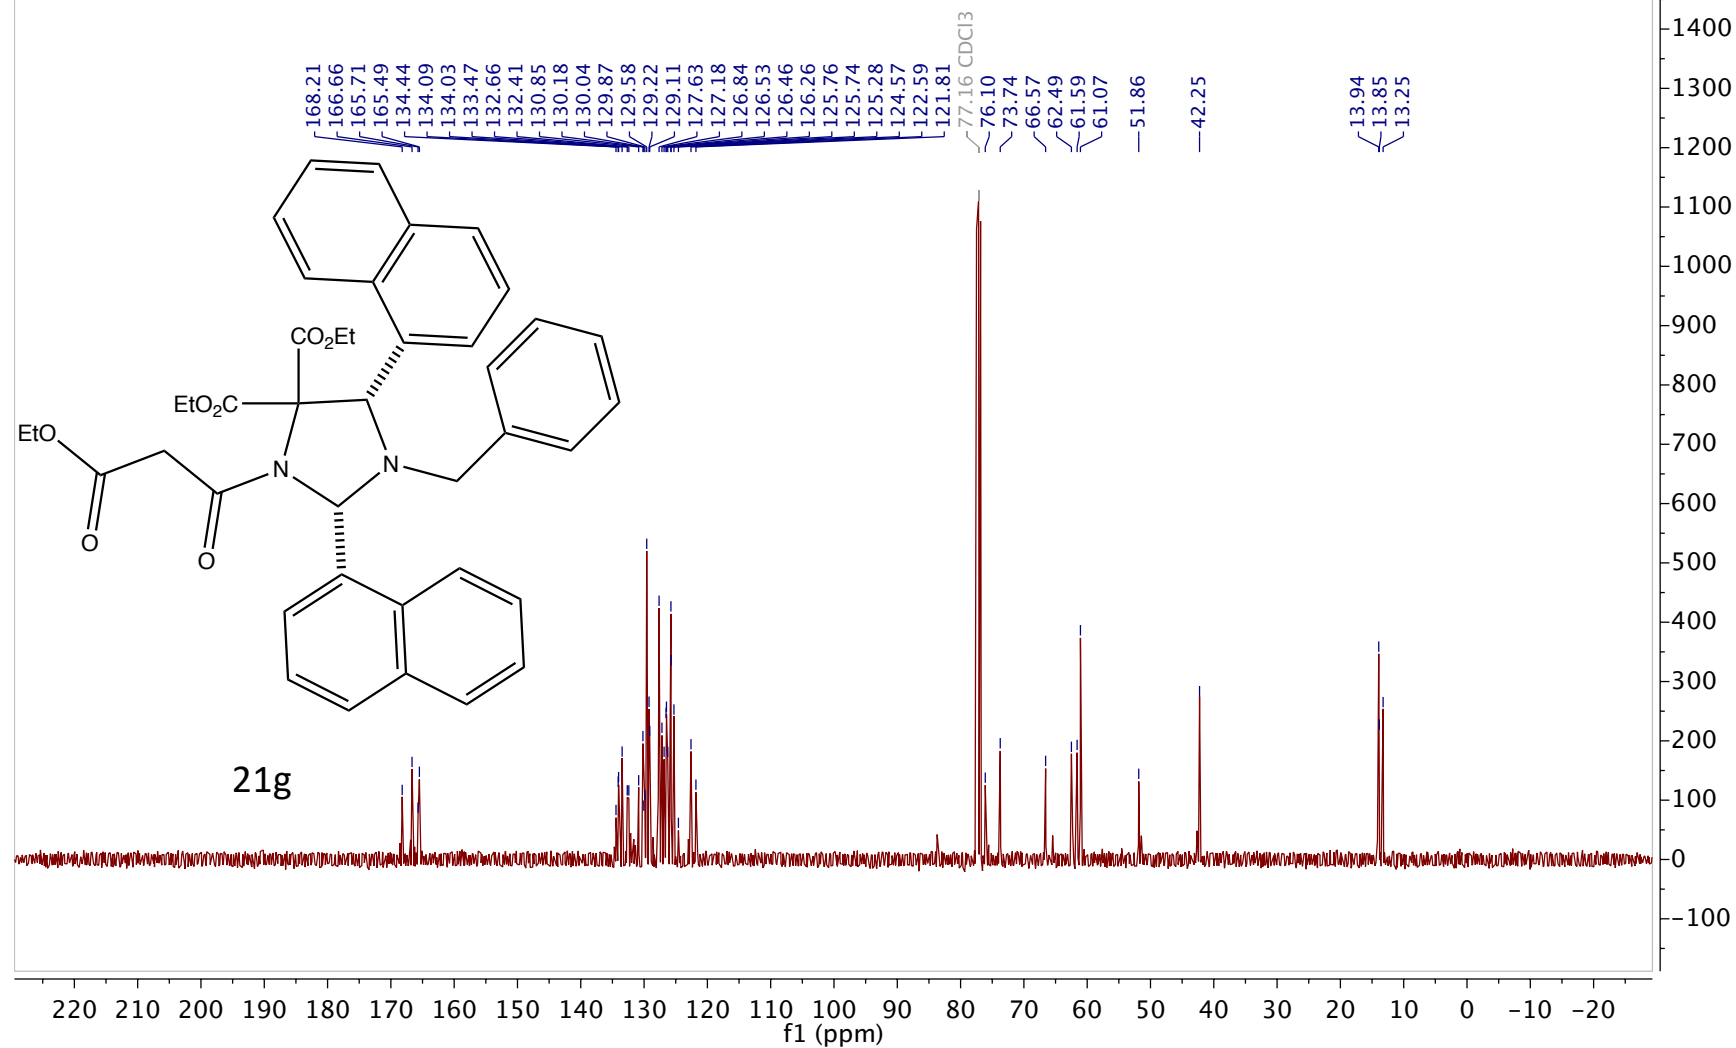

Apr29-2019-58-LS392(P) C2-C12.1.fid  
Instrument AVF400  
Chemist Liban Saney  
Group MGM  
Project Account Code DM7300  
h1acq.crl CDCl3 {C:\NMR} mgmgrp 58

<sup>1</sup>H NMR (400 MHz CDCl<sub>3</sub>)

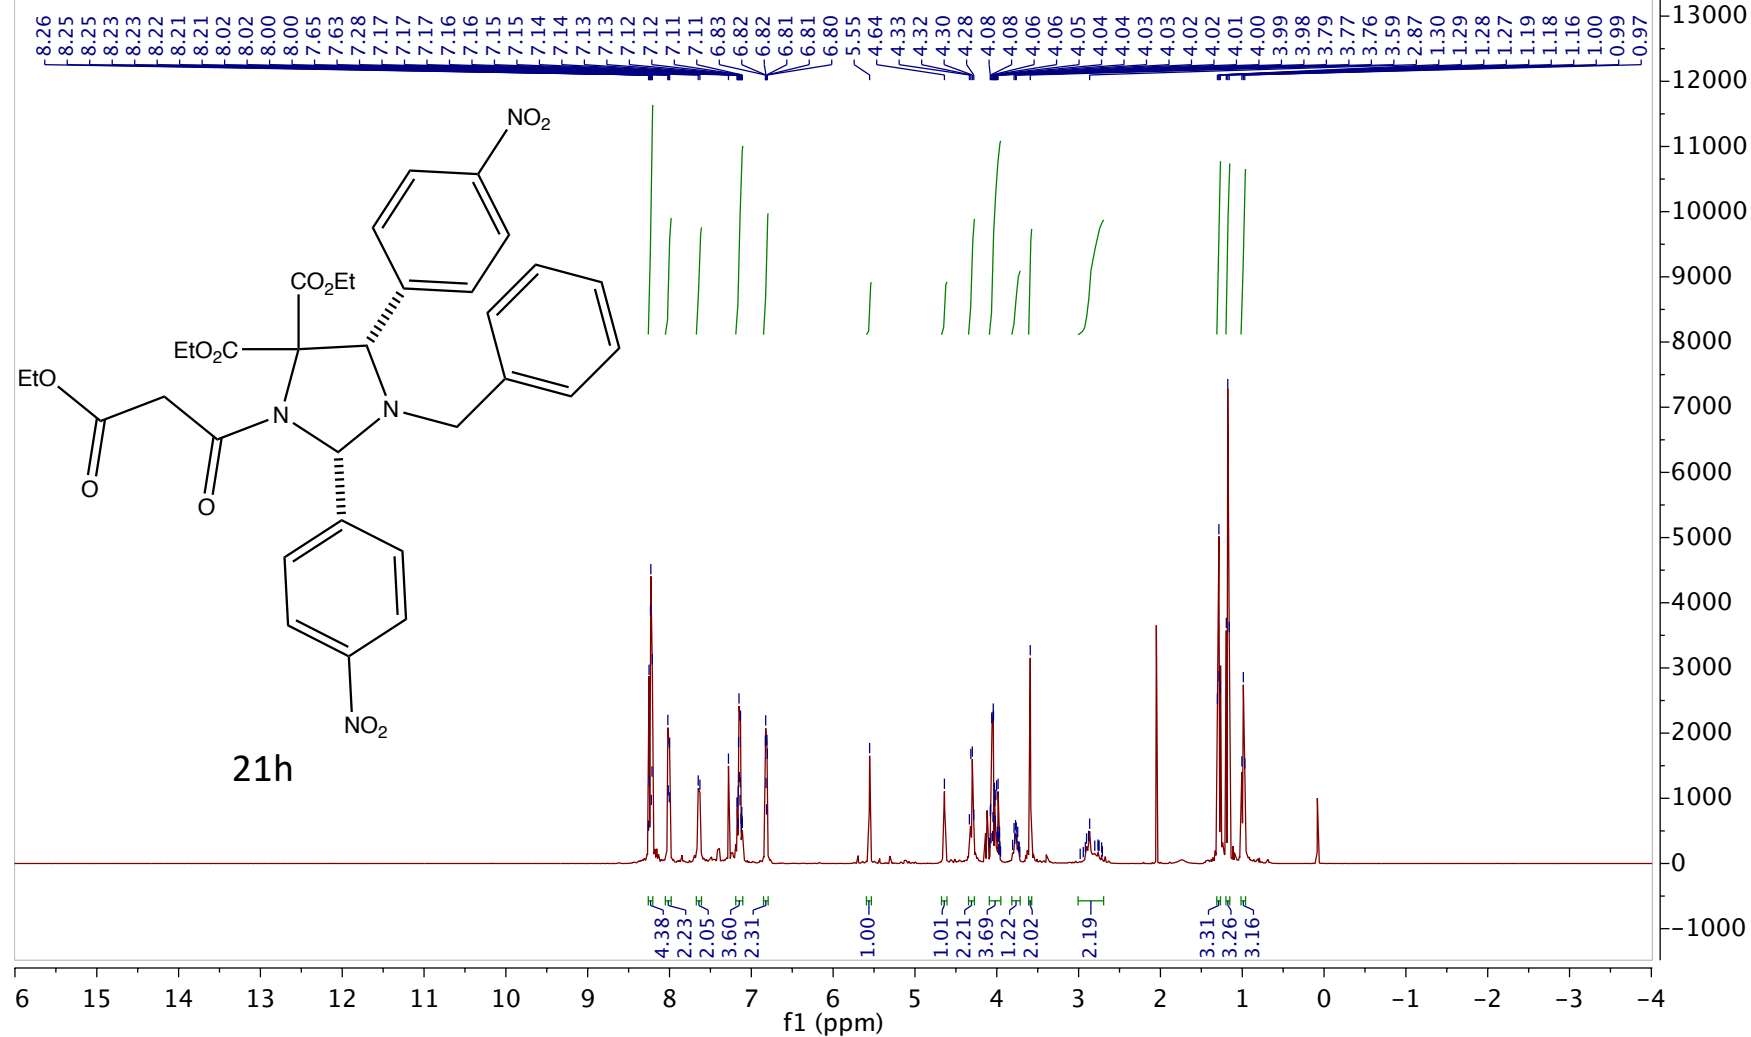



Apr29-2019-58-LS392(P) C2-C12.4.fid  
Instrument AVF400  
Chemist Liban Saney  
Group MGM  
Project Account Code DM7300  
c13acq\_512.crl CDCl3 {C:\NMR} mgmgrp 58

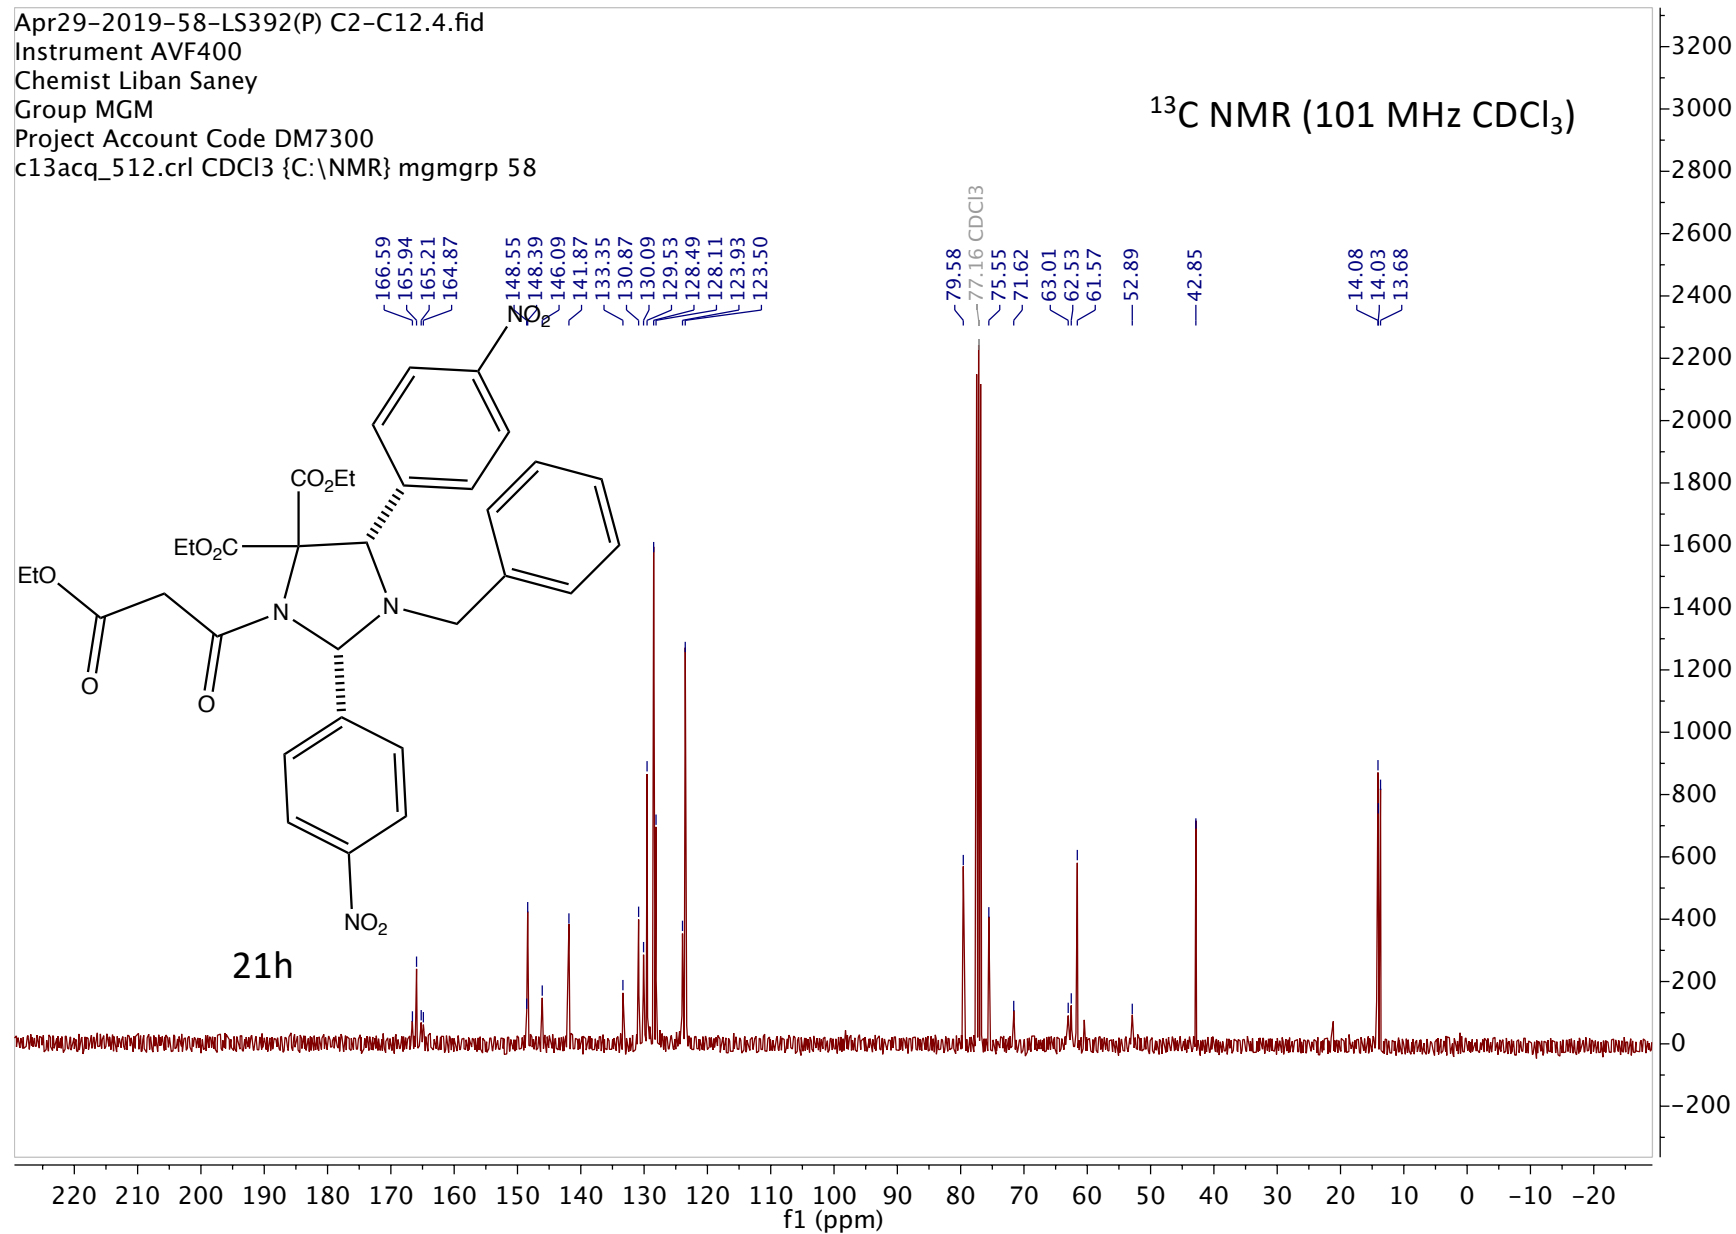

Jan18-2020-1-LS618(P) B8-C8.1.fid  
Instrument AVF400  
Chemist Liban Saney  
Group MGM  
Project Account Code DM7300  
h1acq.crl CDCl3 {C:\NMR} mgmgrp 1

<sup>1</sup>H NMR (400 MHz CDCl<sub>3</sub>)

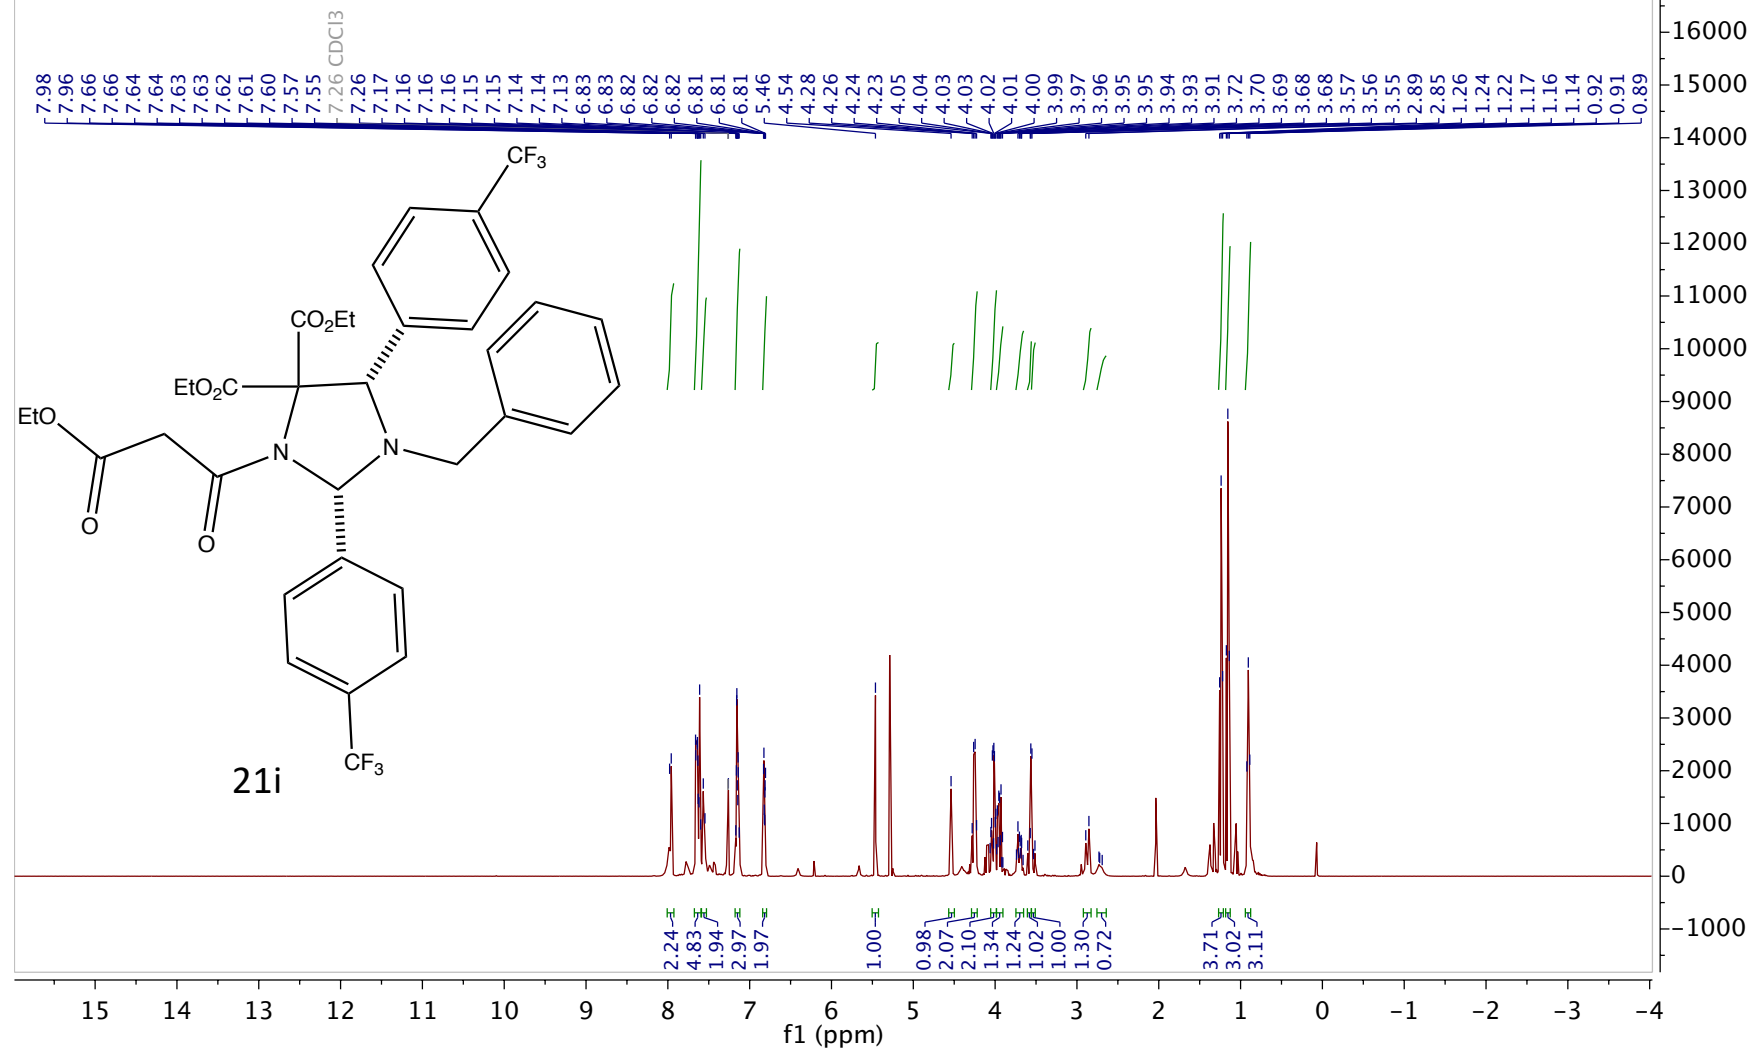

Jan18-2020-1-LS618(P) B8-C8.4.fid  
Instrument AVF400  
Chemist Liban Saney  
Group MGM  
Project Account Code DM7300  
c13acq\_512.crl CDCl3 {C:\NMR} mgmgrp 1

<sup>13</sup>C NMR (101 MHz CDCl<sub>3</sub>)

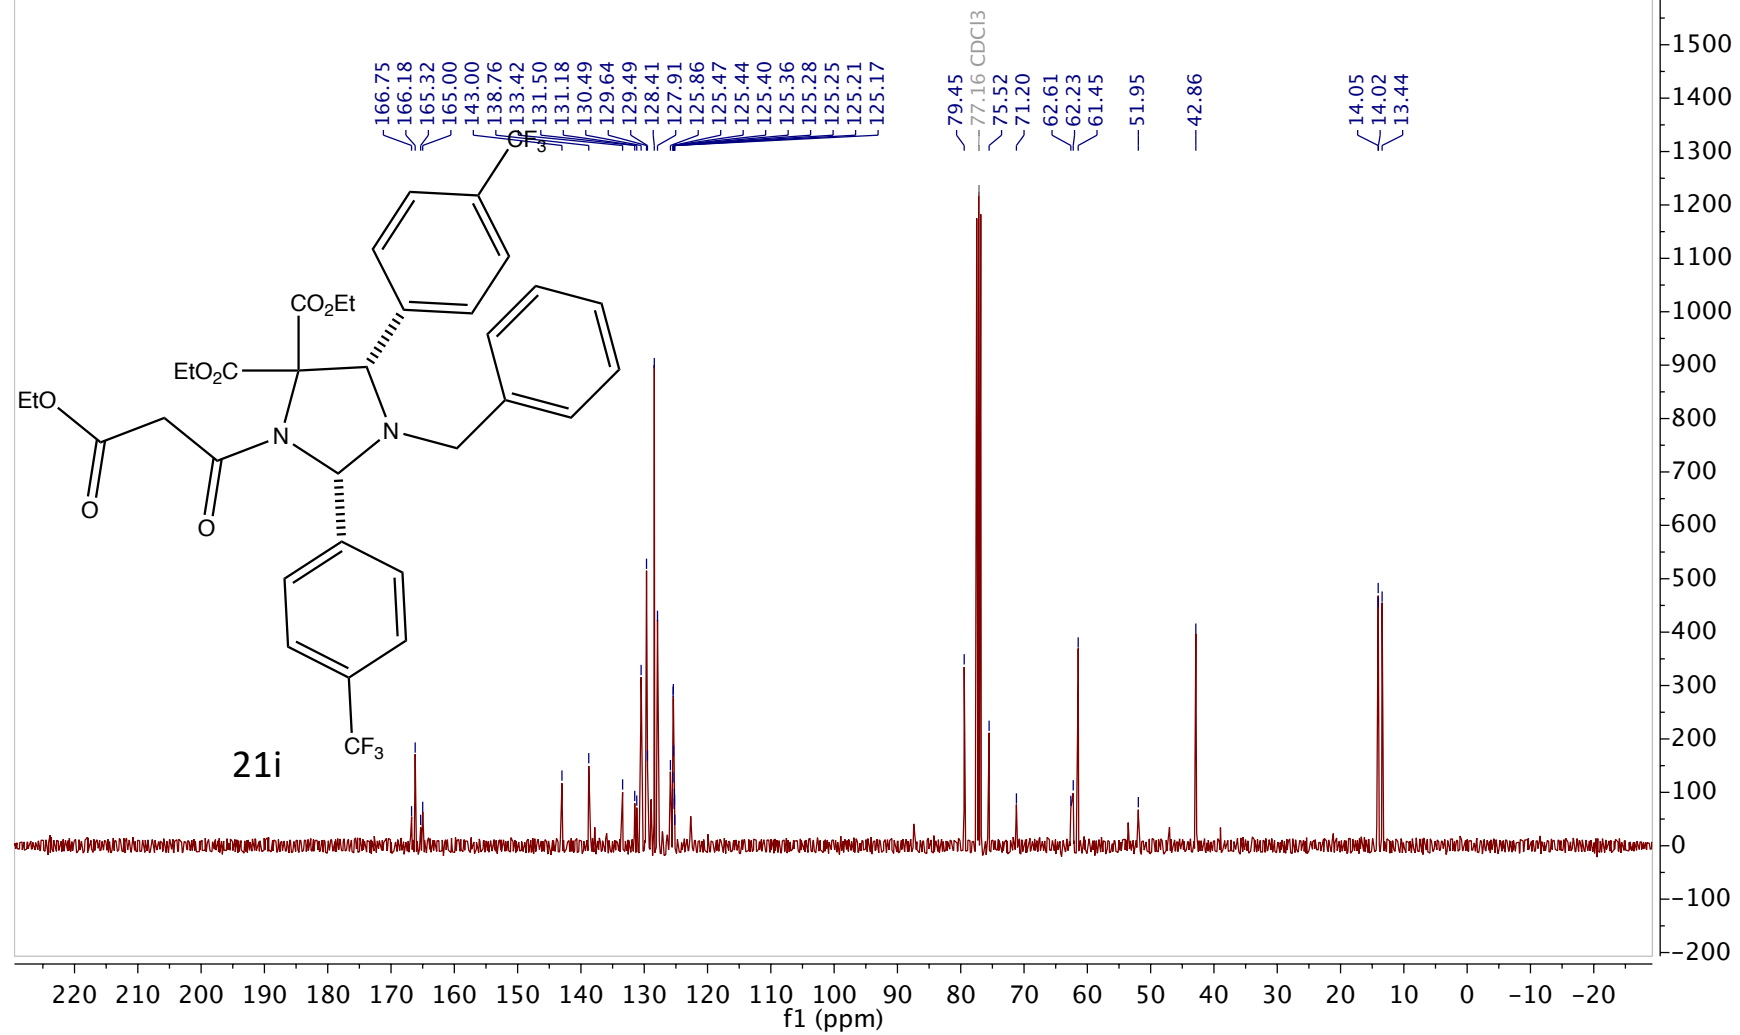

Jan18-2020-1-LS618(P) B8-C8.7.fid  
Instrument AVF400  
Chemist Liban Saney  
Group MGM  
Project Account Code DM7300  
f19acq\_256.crl CDCl3 {C:\NMR} mgmgrp 1

$^{19}\text{F}$  NMR (377 MHz  $\text{CDCl}_3$ )

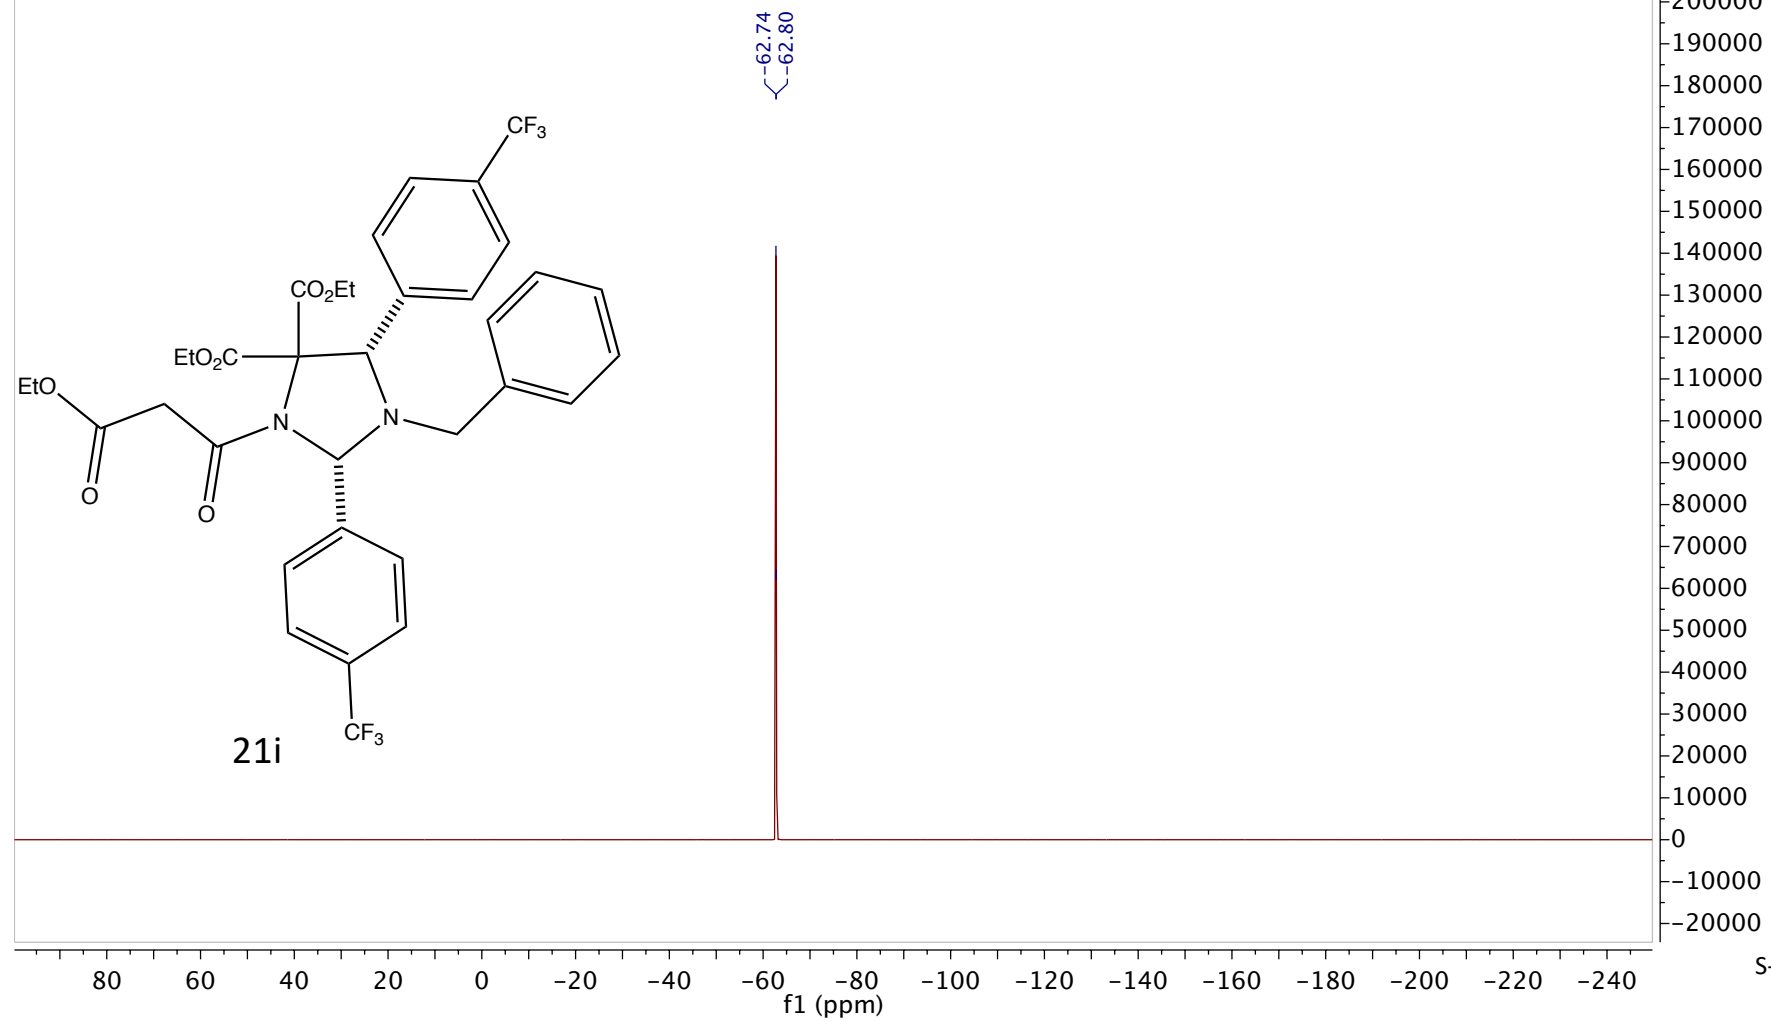

Jan22-2020-1-LS624(P) C5-D1.1.fid  
Instrument AVF400  
Chemist Liban Saney  
Group MGM  
Project Account Code DM7300  
h1acq.crl CDCl3 {C:\NMR} mgmgrp 1

<sup>1</sup>H NMR (400 MHz CDCl<sub>3</sub>)

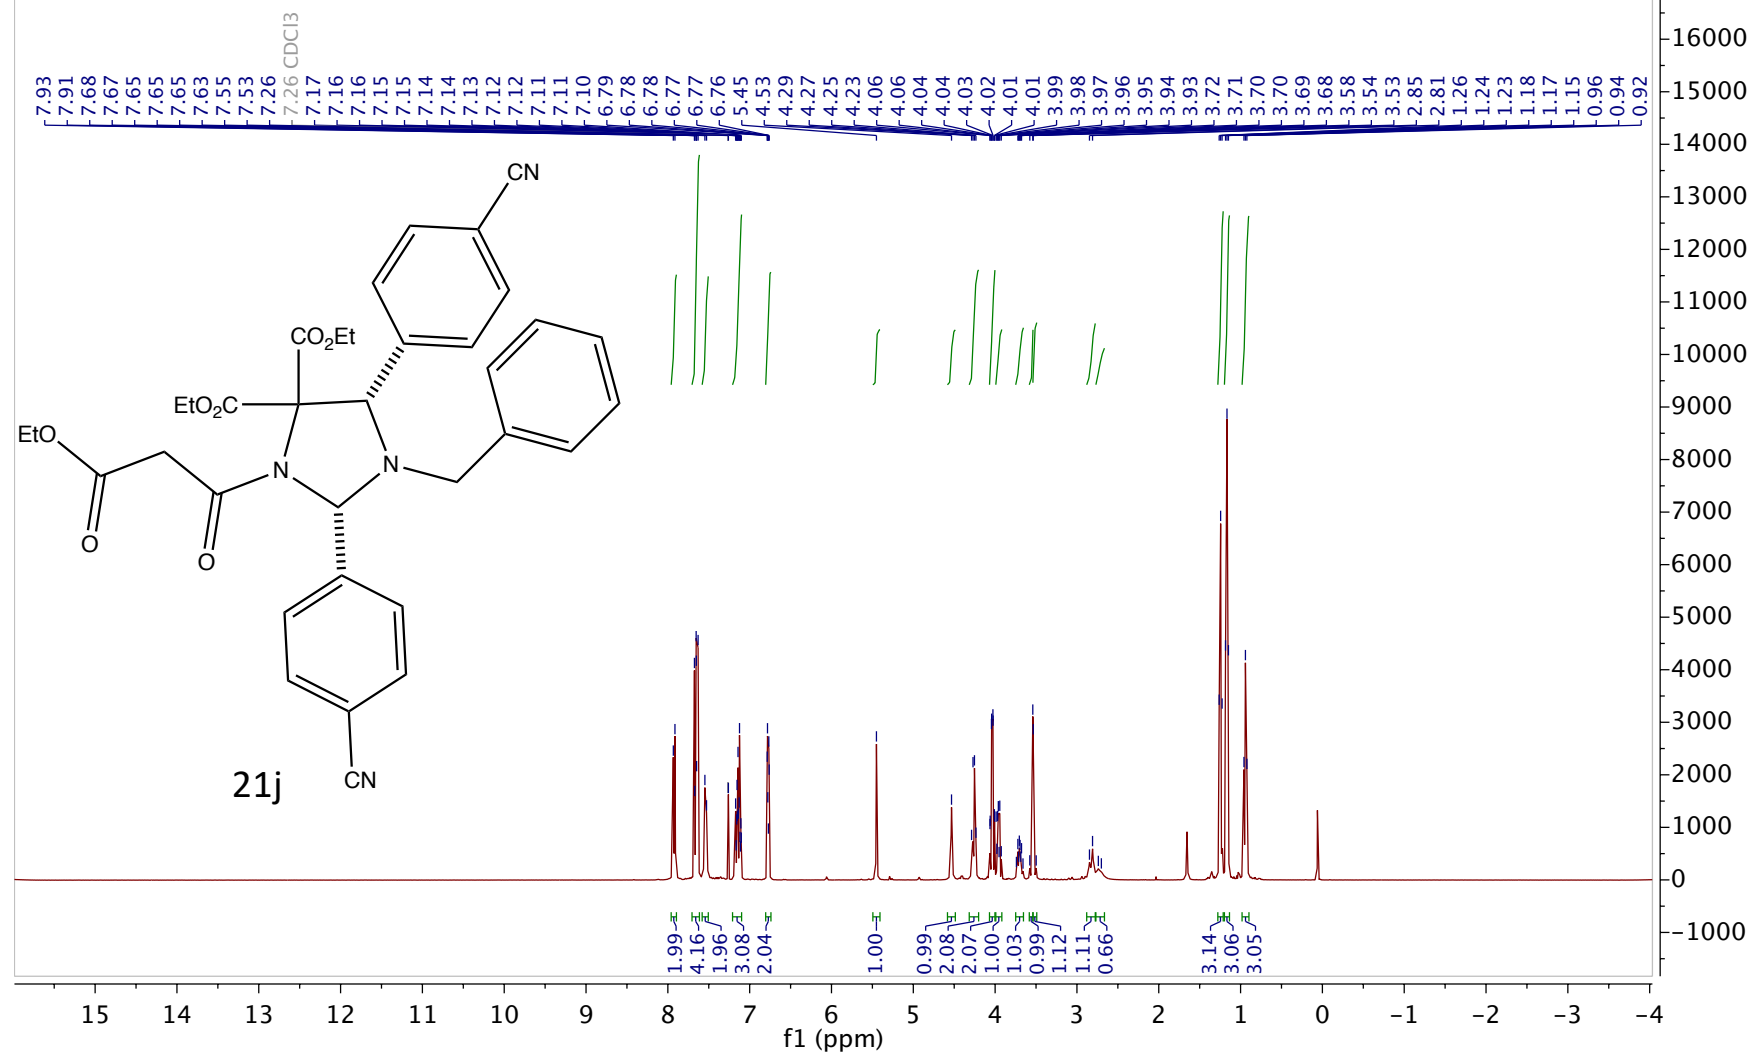

Jan22-2020-1-LS624(P) C5-D1.5.fid  
Instrument AVF400  
Chemist Liban Saney  
Group MGM  
Project Account Code DM7300  
c13acq\_512.crl CDCl3 {C:\NMR} mgmgrp 1

<sup>13</sup>C NMR (101 MHz CDCl<sub>3</sub>)

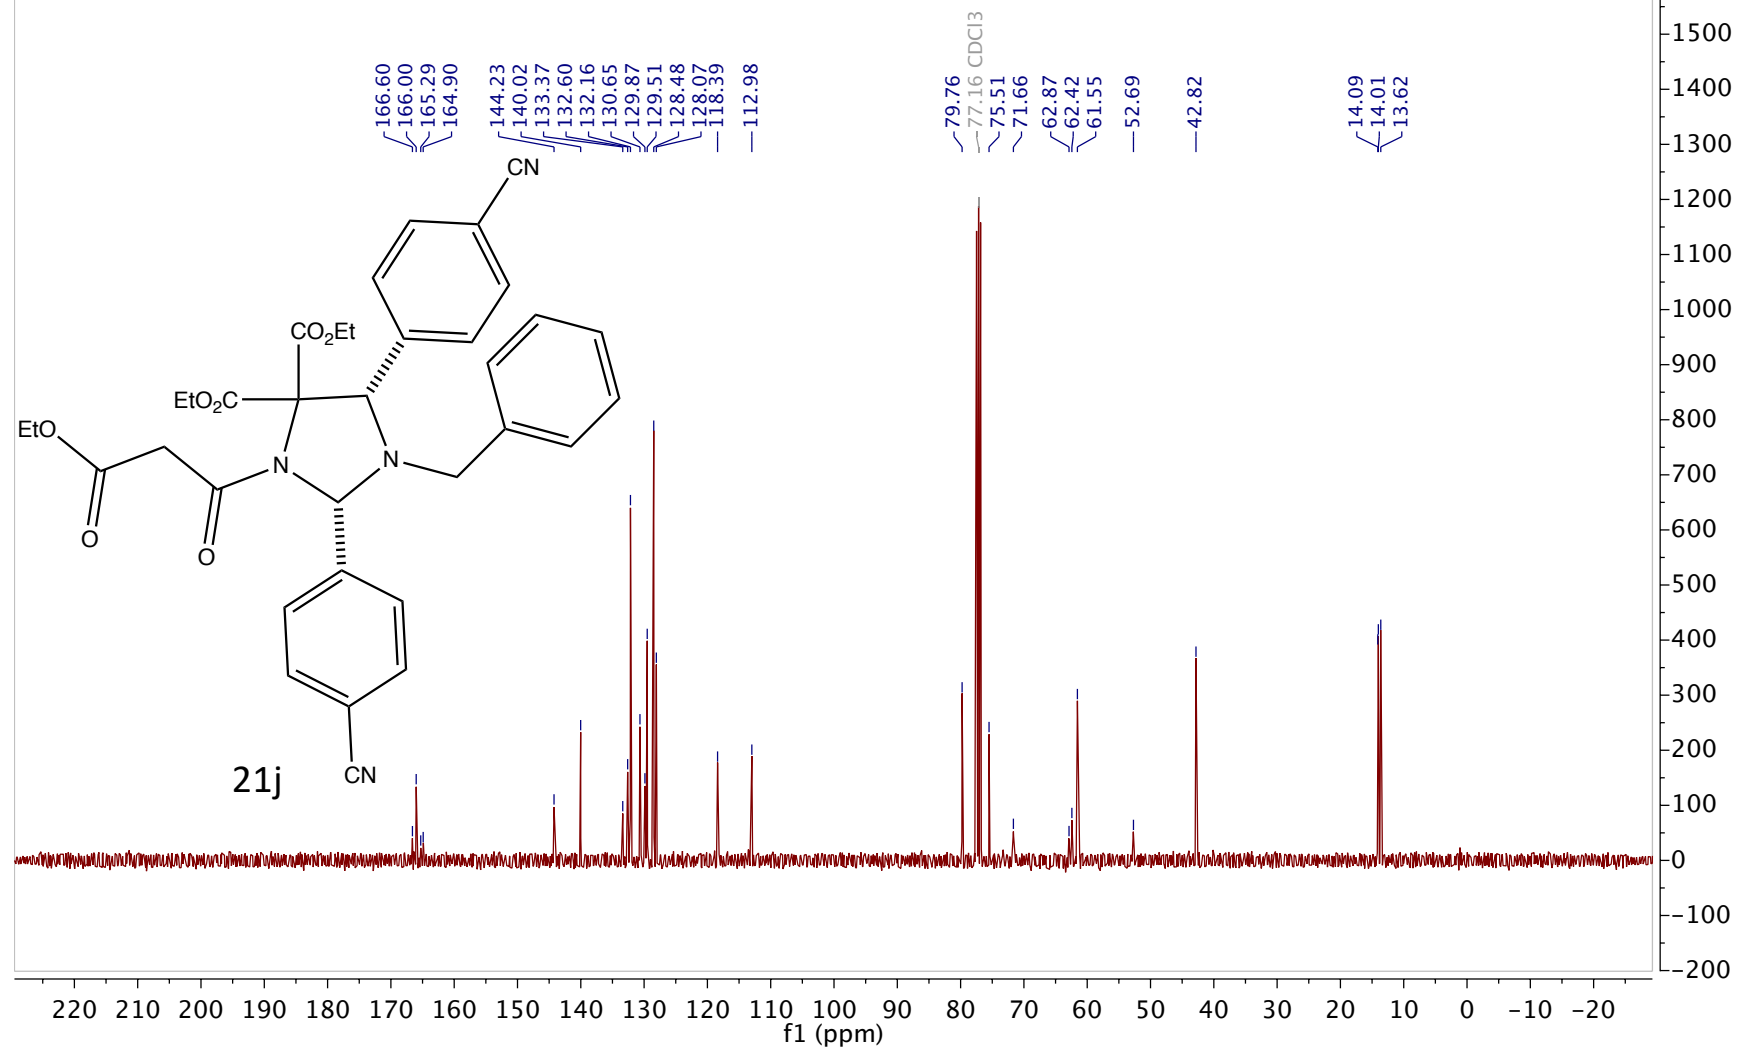

Jan28-2020-1-LS630(P) C11-D7.1.fid  
Instrument AVF400  
Chemist Liban Saney  
Group MGM  
Project Account Code DM7300  
h1acq.crl CDCl3 {C:\NMR} mgmgrp 1

<sup>1</sup>H NMR (400 MHz CDCl<sub>3</sub>)

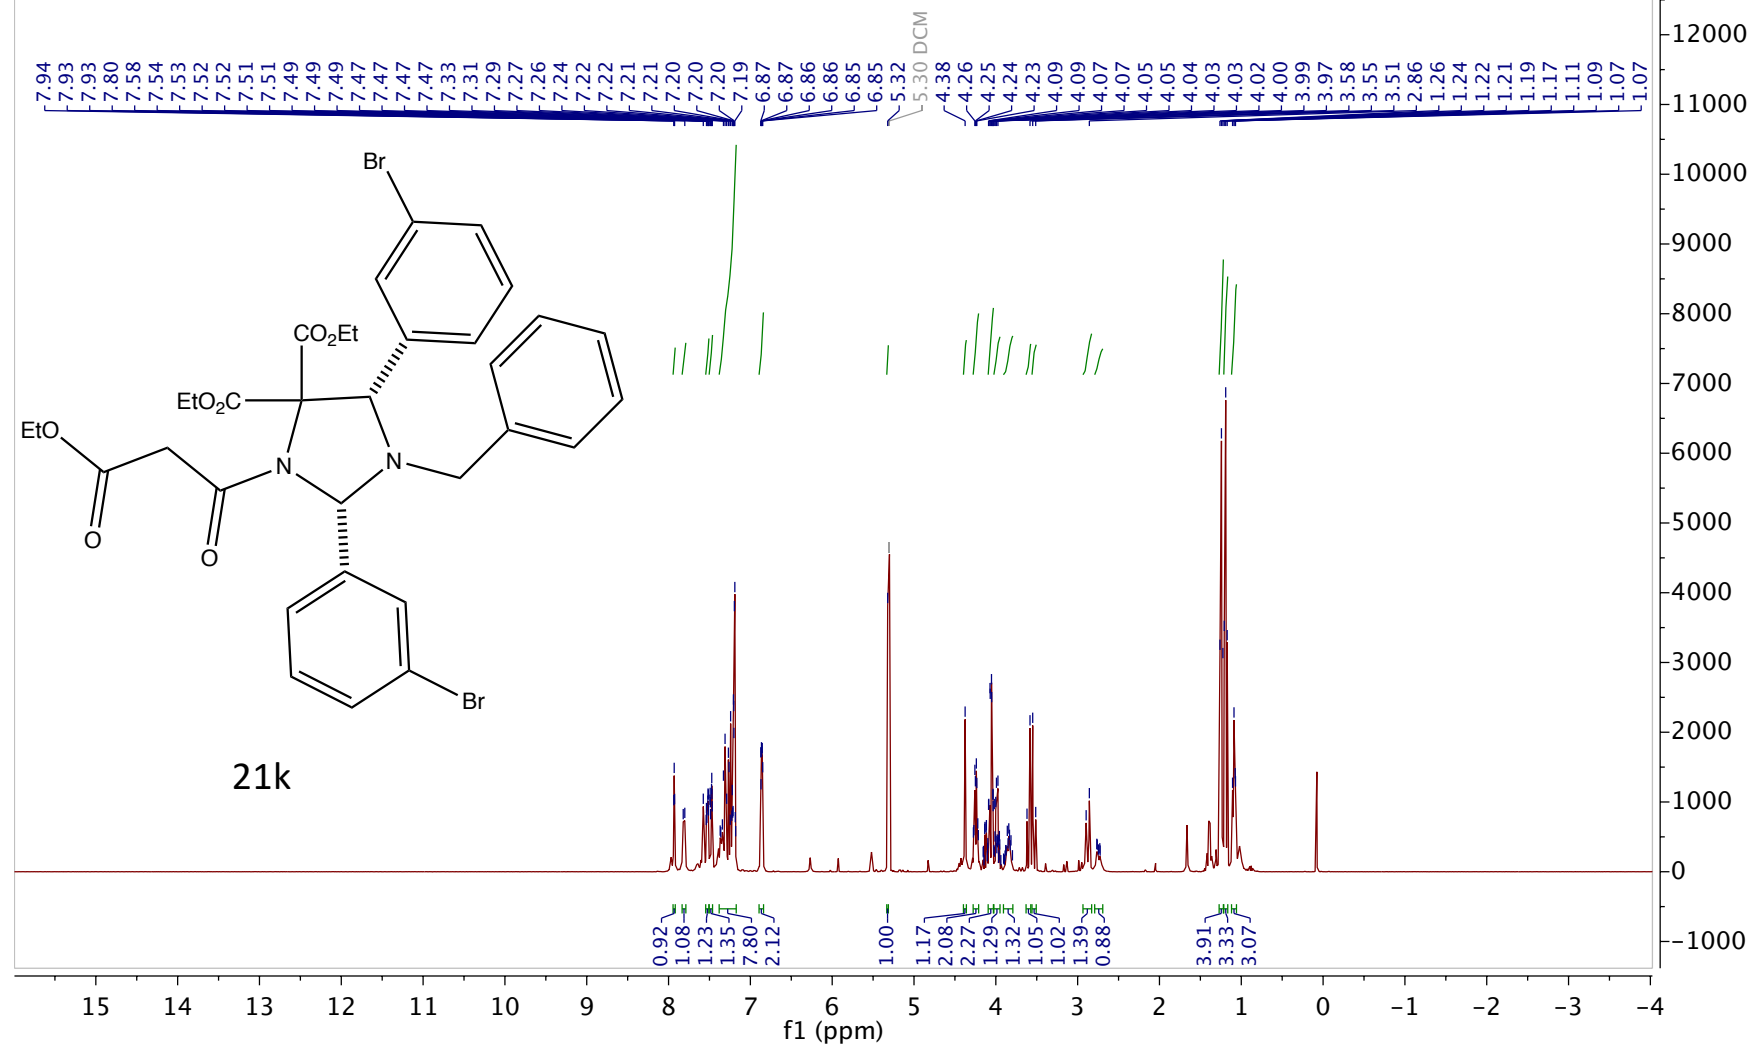

Jan28-2020-1-LS630(P) C11-D7.4.fid  
Instrument AVF400  
Chemist Liban Saney  
Group MGM  
Project Account Code DM7300  
c13acq\_512.crl CDCl3 {C:\NMR} mgmgrp 1

<sup>13</sup>C NMR (101 MHz CDCl<sub>3</sub>)

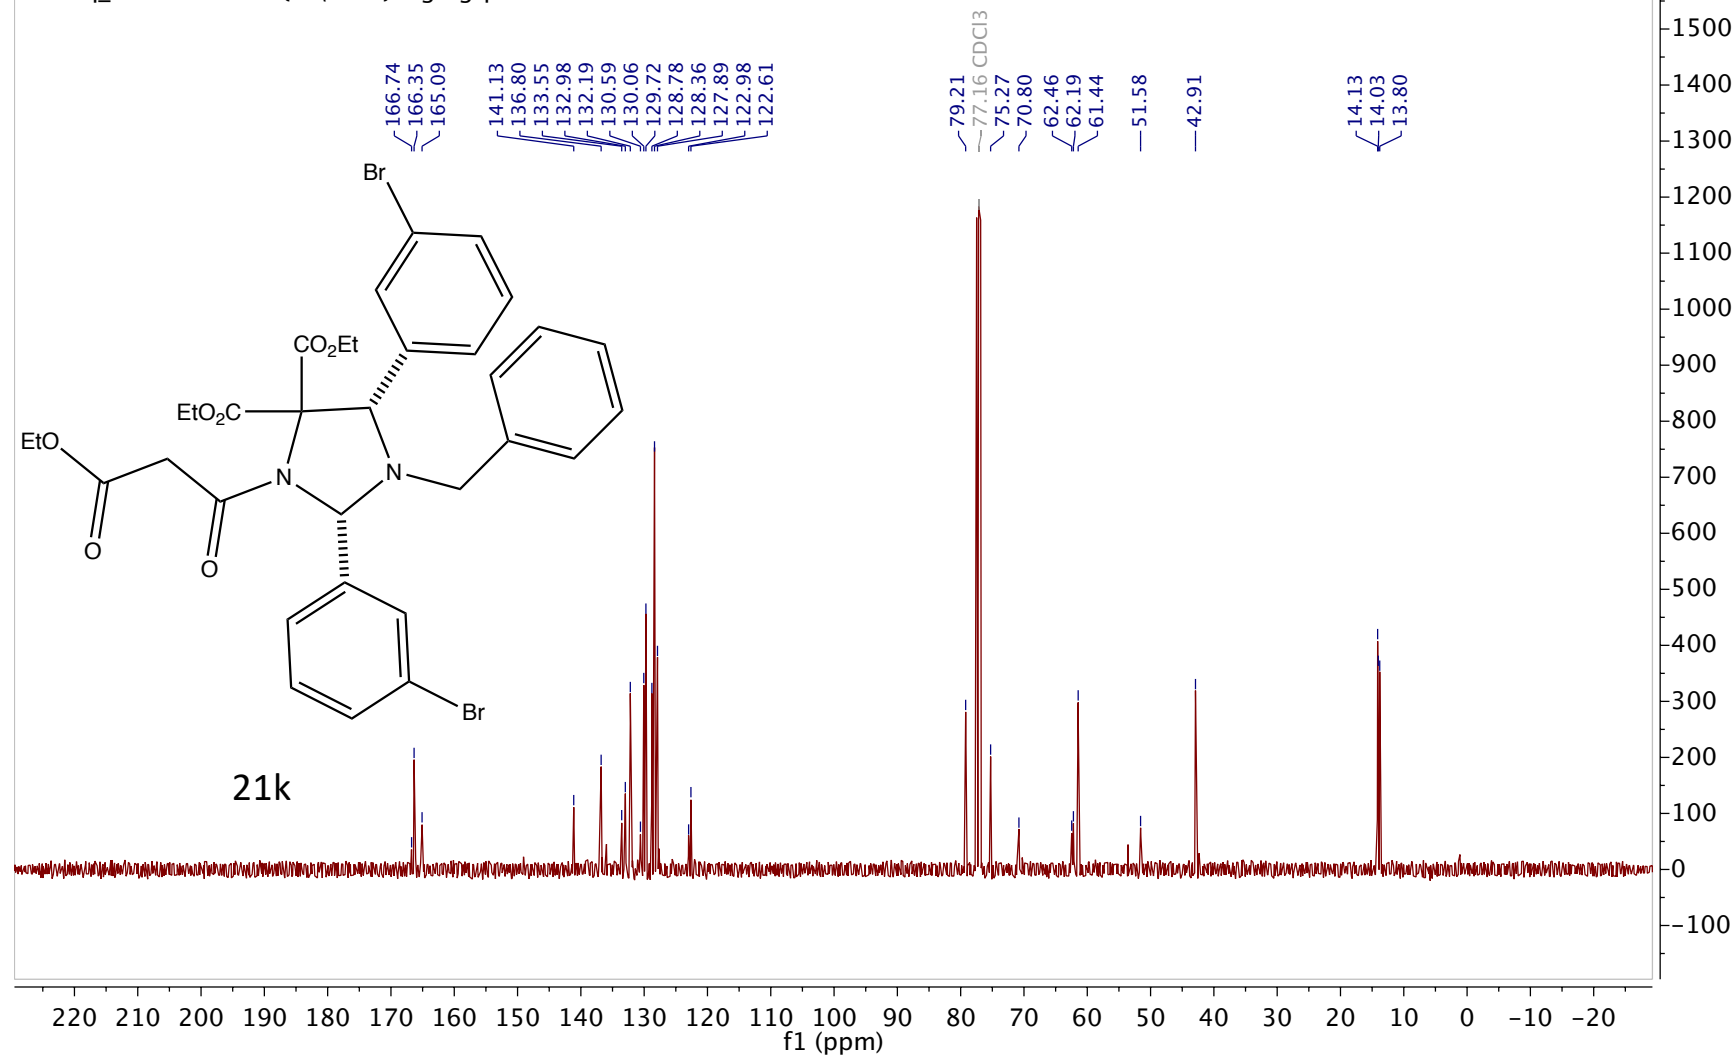



Jan30-2020-1-LS635(P) B8-C7.1.fid  
Instrument AVF400  
Chemist Liban Saney  
Group MGM  
Project Account Code DM7300  
h1acq.crl CDCl3 {C:\NMR} mgmgrp 1

<sup>1</sup>H NMR (400 MHz CDCl<sub>3</sub>)

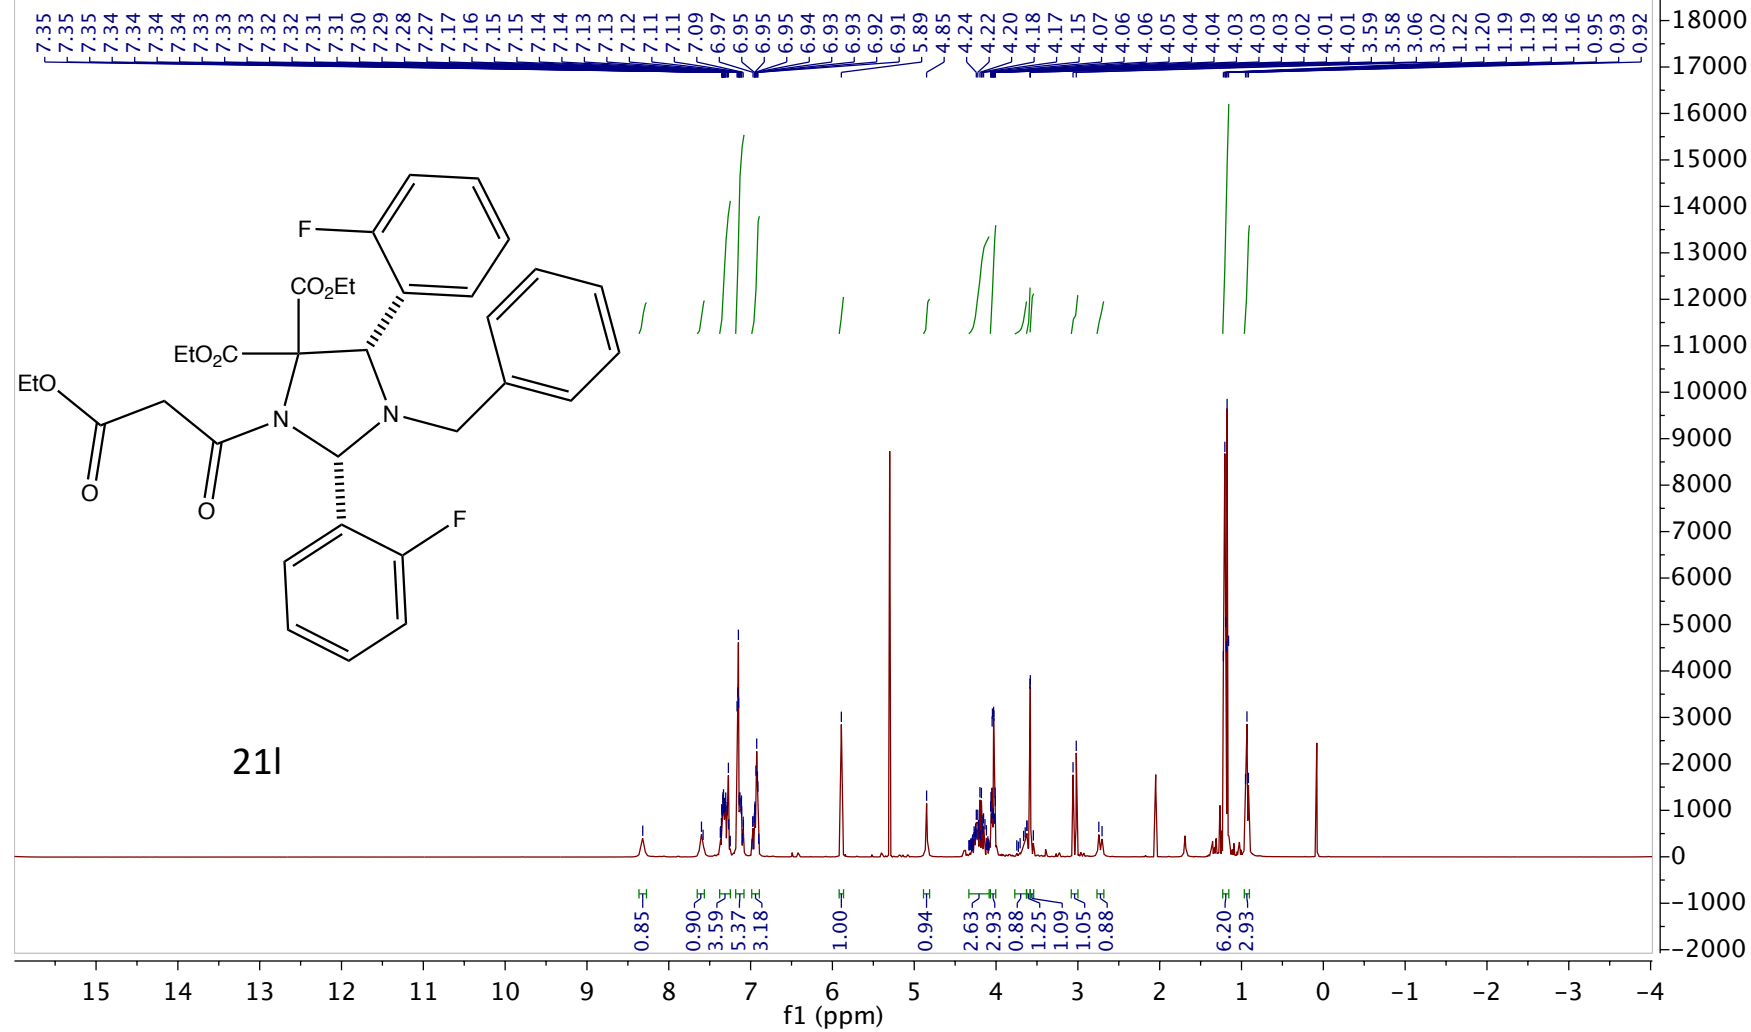

Jan30-2020-1-LS635(P) B8-C7.5.fid  
Instrument AVF400  
Chemist Liban Saney  
Group MGM  
Project Account Code DM7300  
c13acq\_512.crl CDCl3 {C:\NMR} mgmgrp 1

$^{13}\text{C}$  NMR (101 MHz  $\text{CDCl}_3$ )

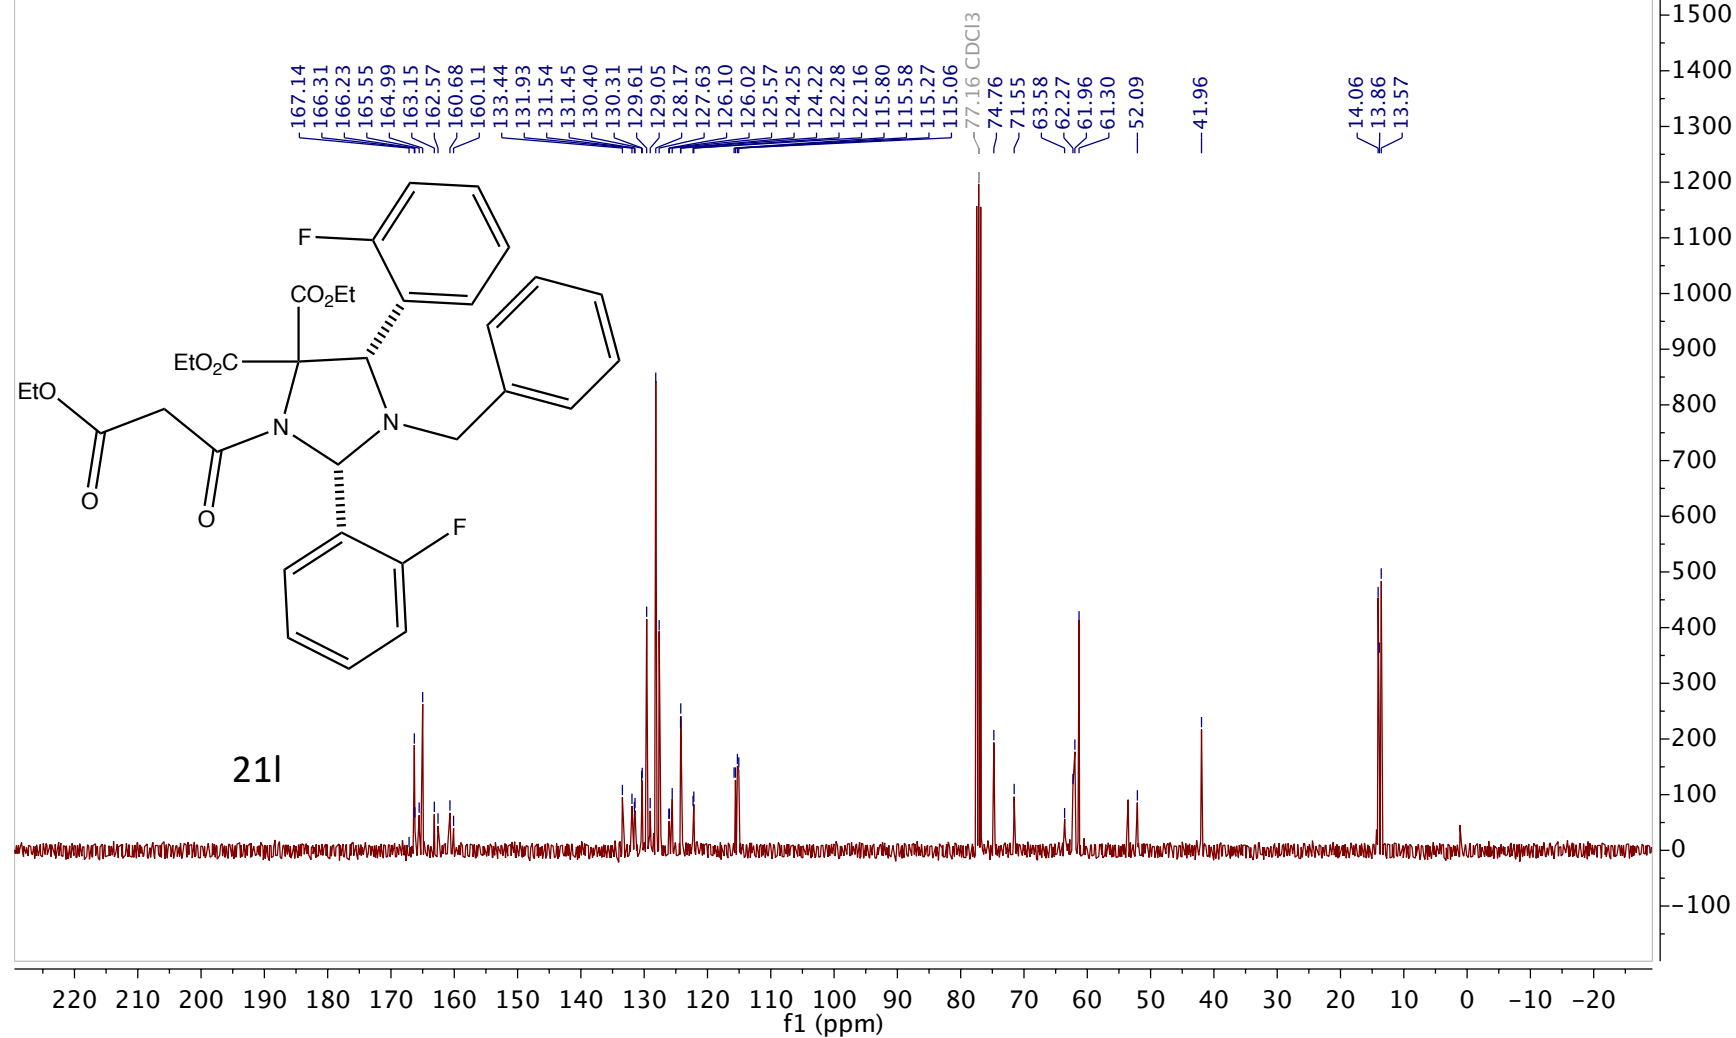

Jan30-2020-1-LS635(P) B8-C7.8.fid  
Instrument AVF400  
Chemist Liban Saney  
Group MGM  
Project Account Code DM7300  
f19acq\_256.crl CDCl3 {C:\NMR} mgmgrp 1

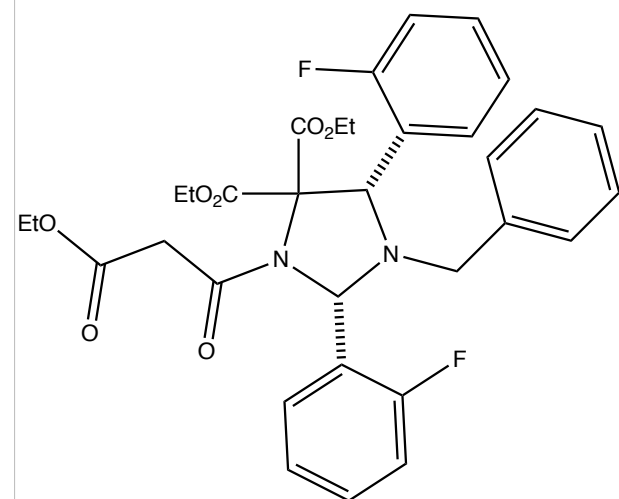

<sup>19</sup>F NMR (377 MHz CDCl<sub>3</sub>)

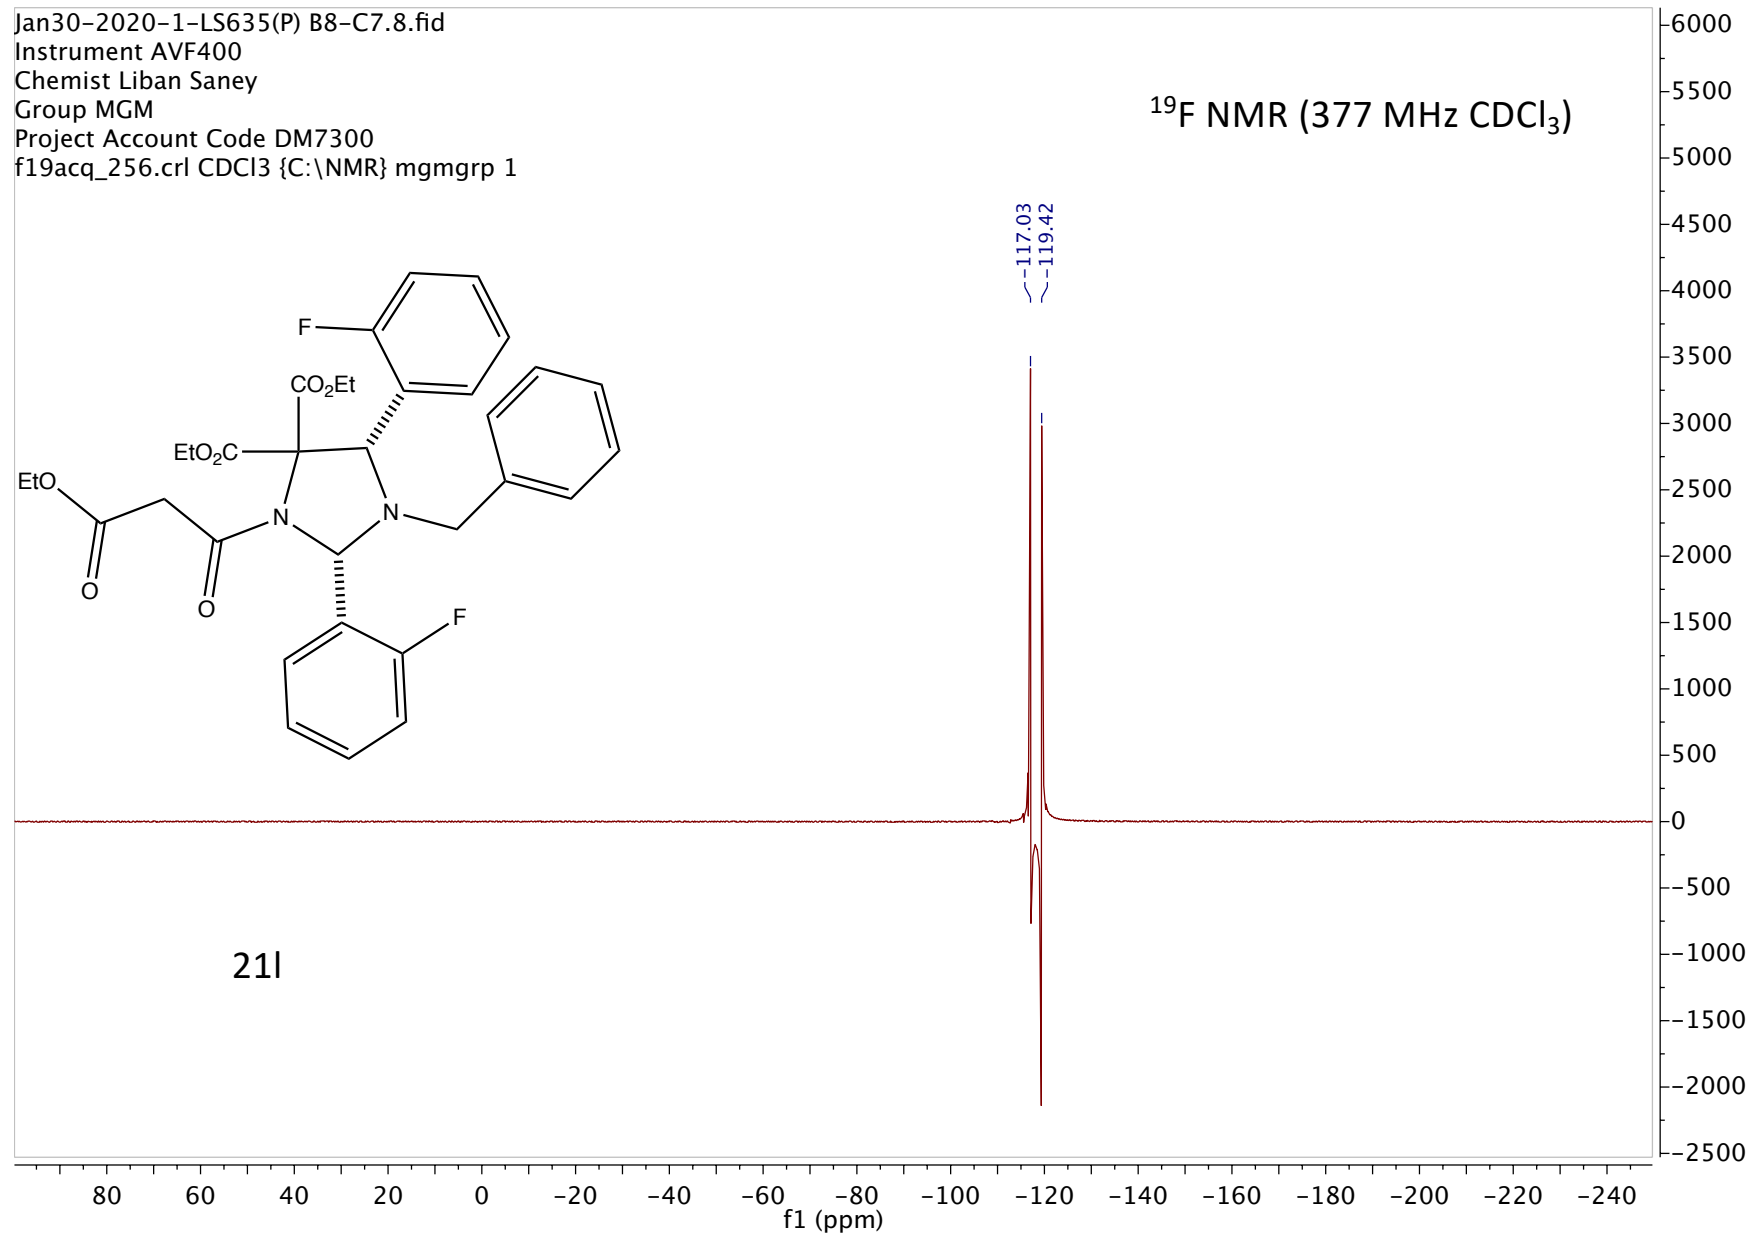

LS911.3.fid  
1H

<sup>1</sup>H NMR (500 MHz CDCl<sub>3</sub>)

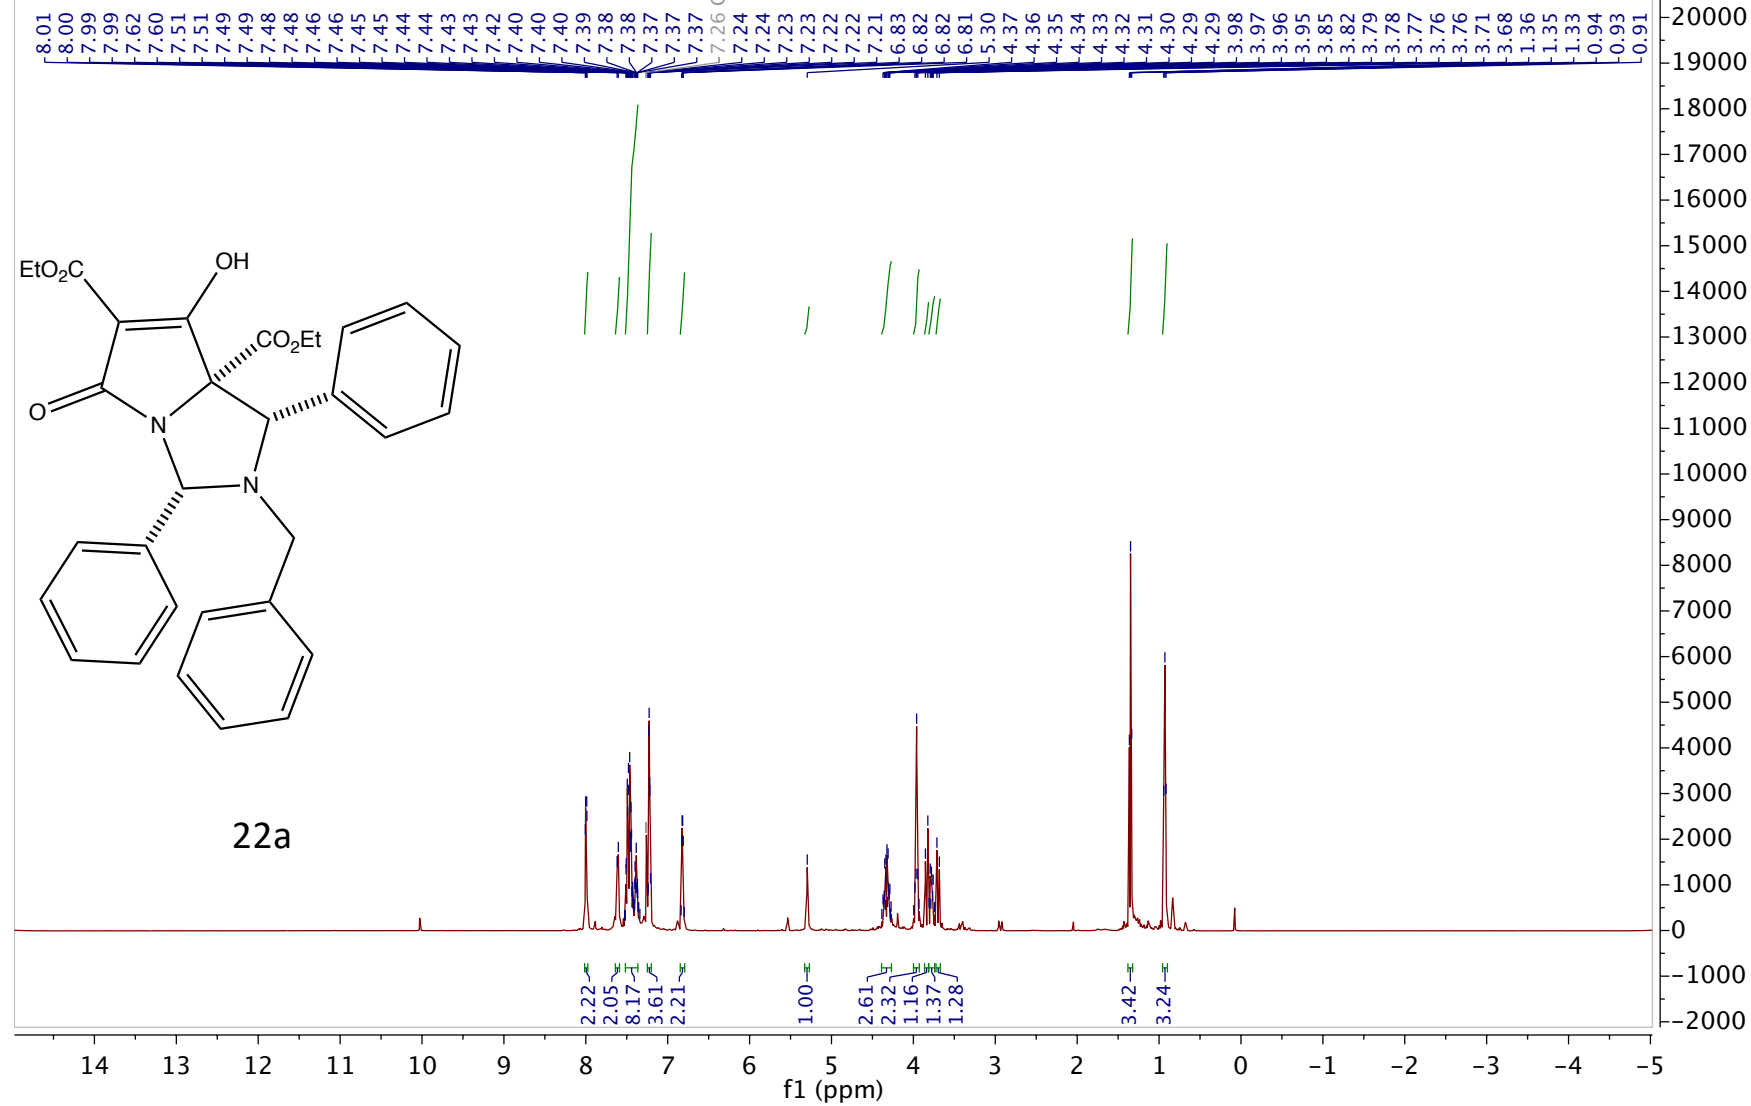

LS911.4.fid  
13C

<sup>13</sup>C NMR (126 MHz CDCl<sub>3</sub>)

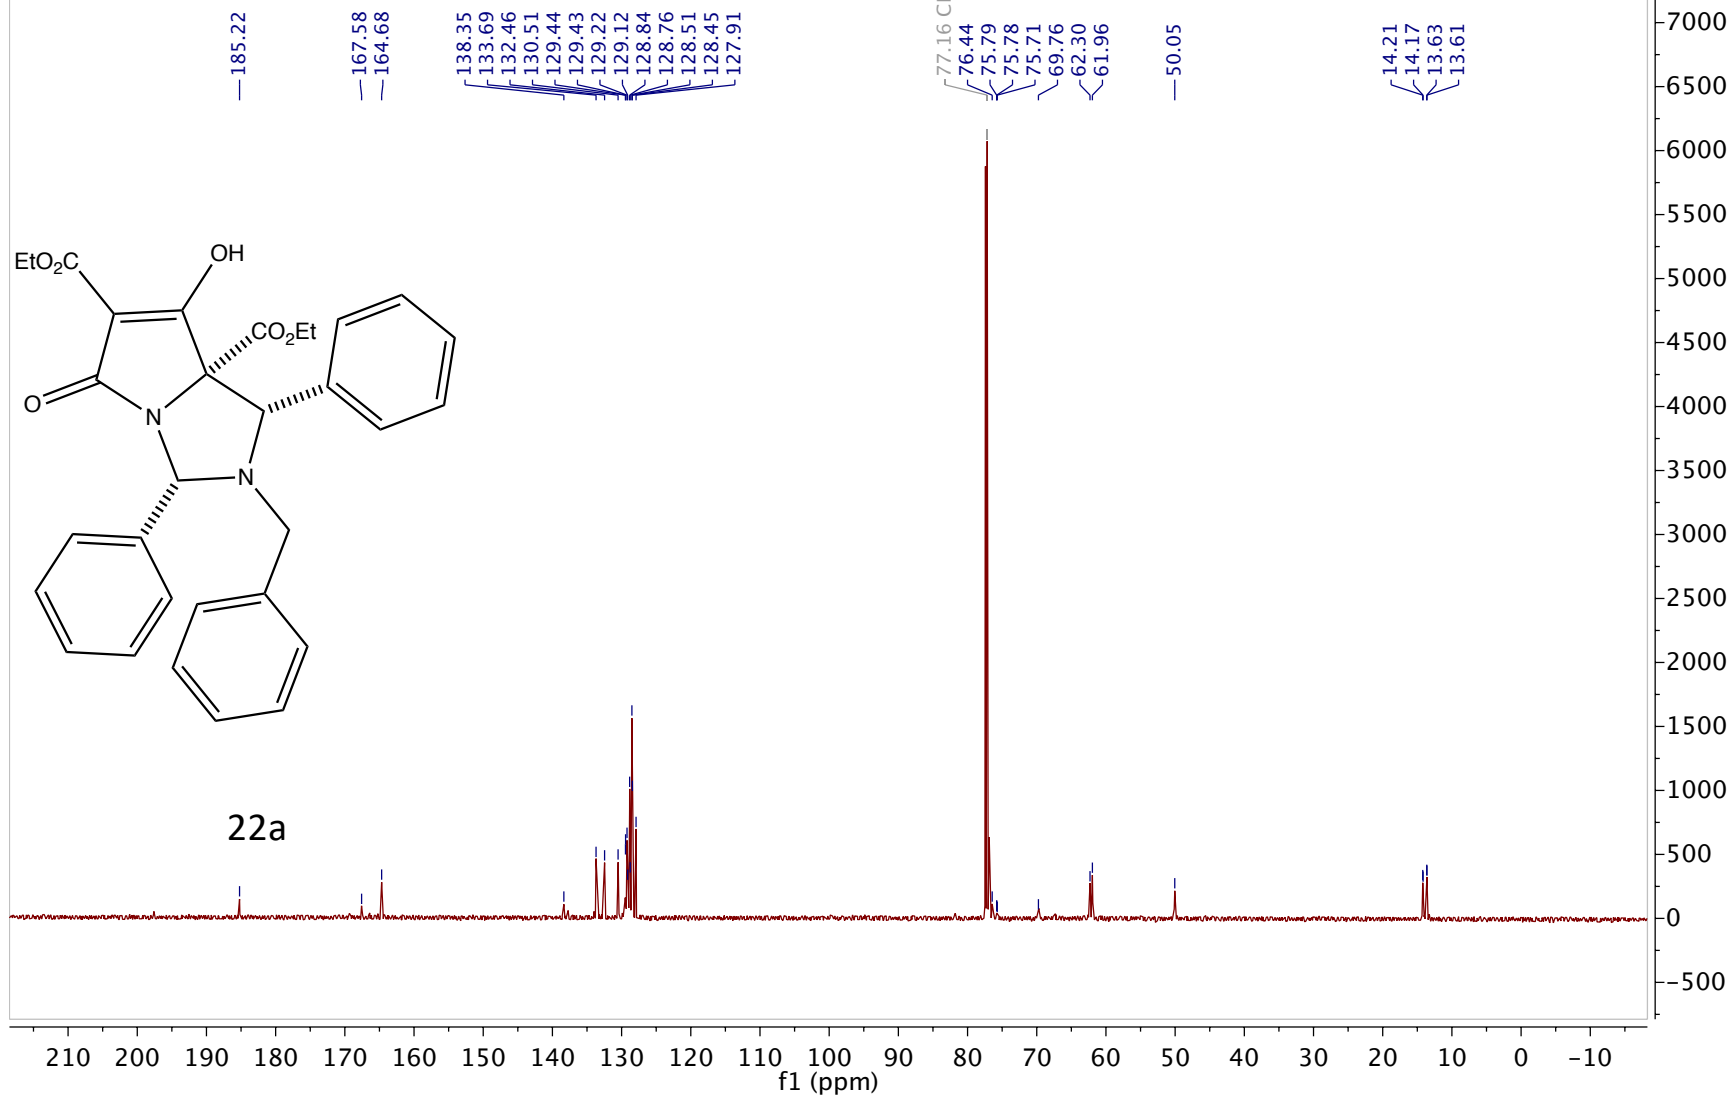



Mar25-2019-59-LS353(C).4.fid

Instrument AVF400

Chemist Liban Saney

Group MGM

Project Account Code DM7300

c13acq\_512.crl CDCl3 {C:\NMR} mgmgrp 59

$^{13}\text{C}$  NMR (101 MHz  $\text{CDCl}_3$ )

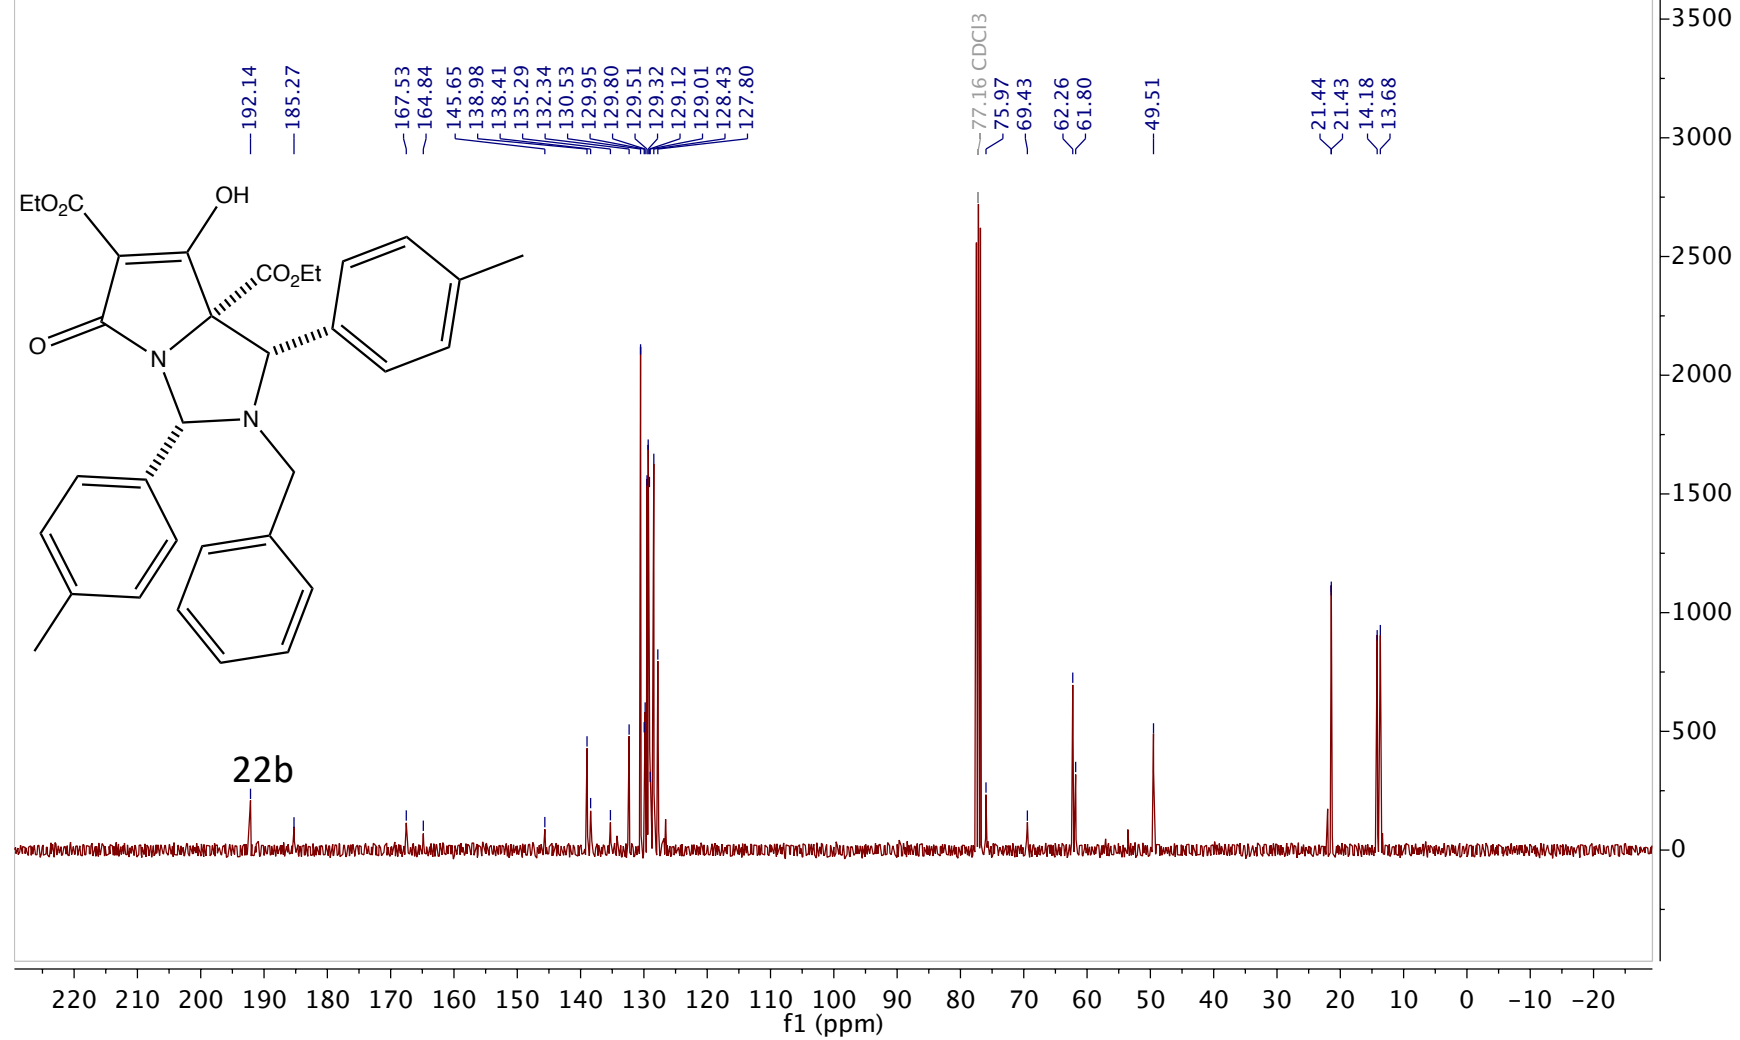





Nov10-2018-60-LS223(C).4.fid

Instrument AVF400

Chemist Liban Saney

Group MGM

Project Account Code DM7300

c13acq\_512.crl CDCl3 {C:\NMR} mgmgrp 60

<sup>13</sup>C NMR (101 MHz CDCl<sub>3</sub>)

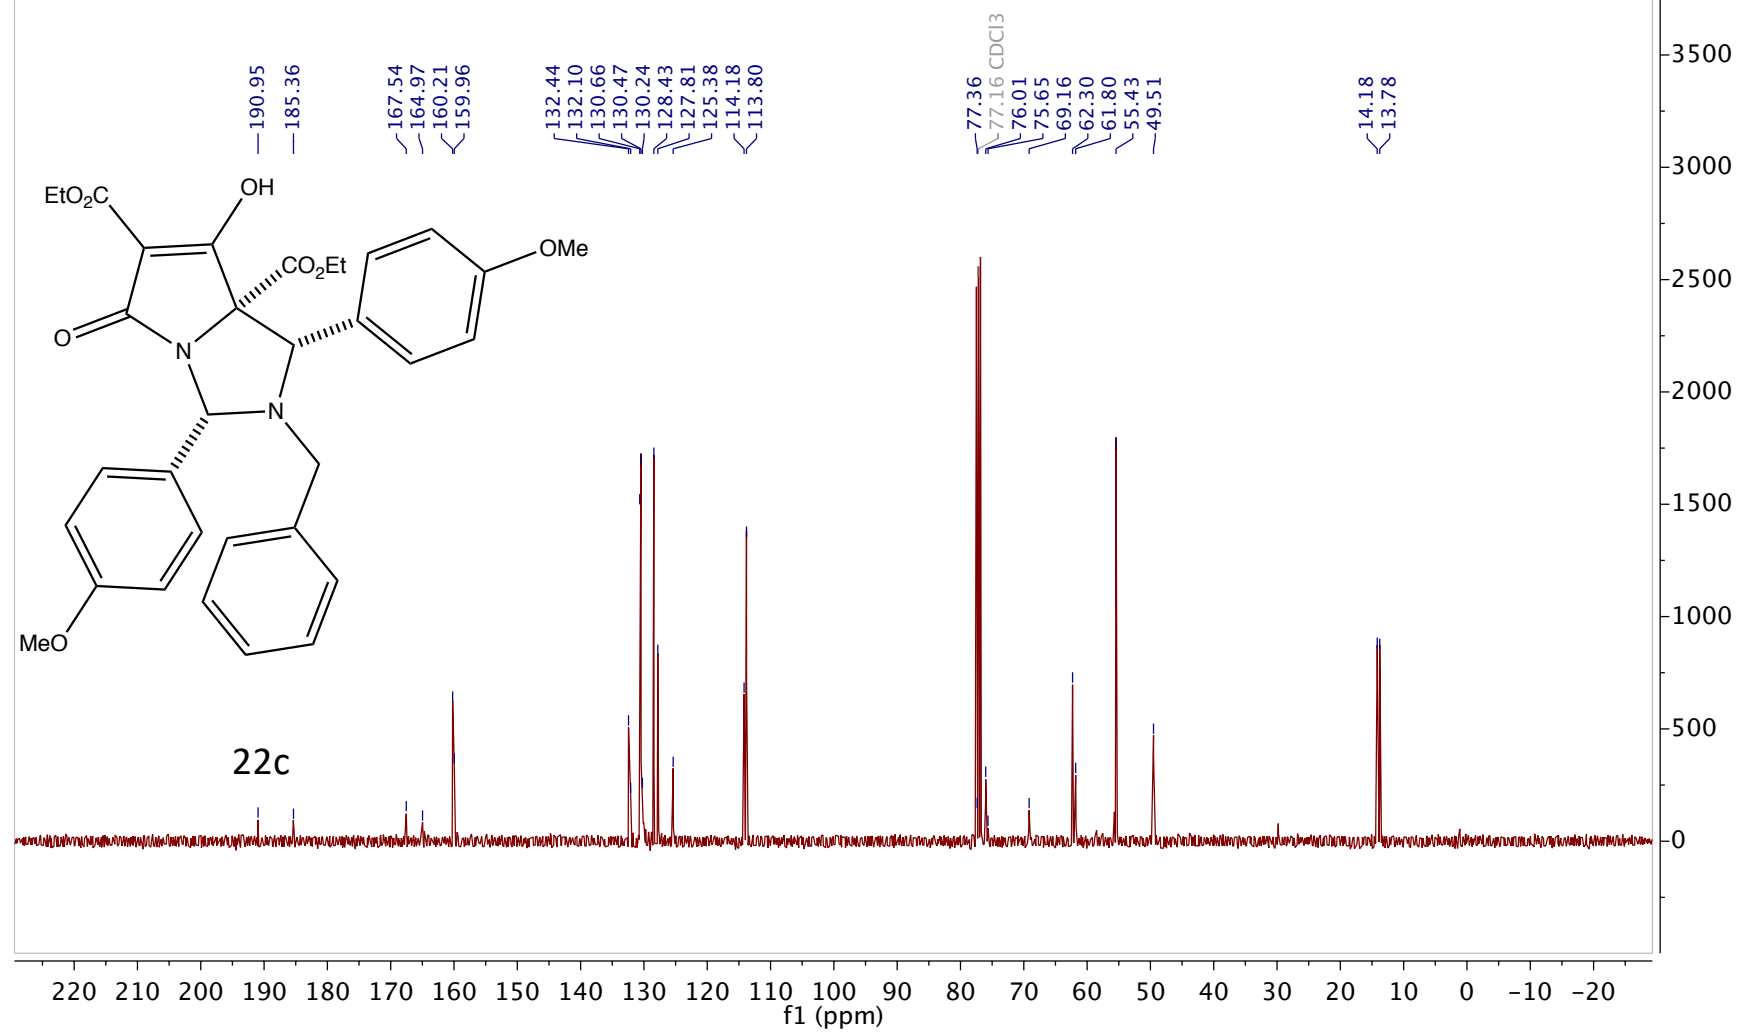

Mar29-2019-59-LS360(C).1.fid  
Instrument AVF400  
Chemist Liban Saney  
Group MGM  
Project Account Code DM7300  
h1acq.crl CDCl3 {C:\NMR} mgmgrp 59

<sup>1</sup>H NMR (400 MHz CDCl<sub>3</sub>)

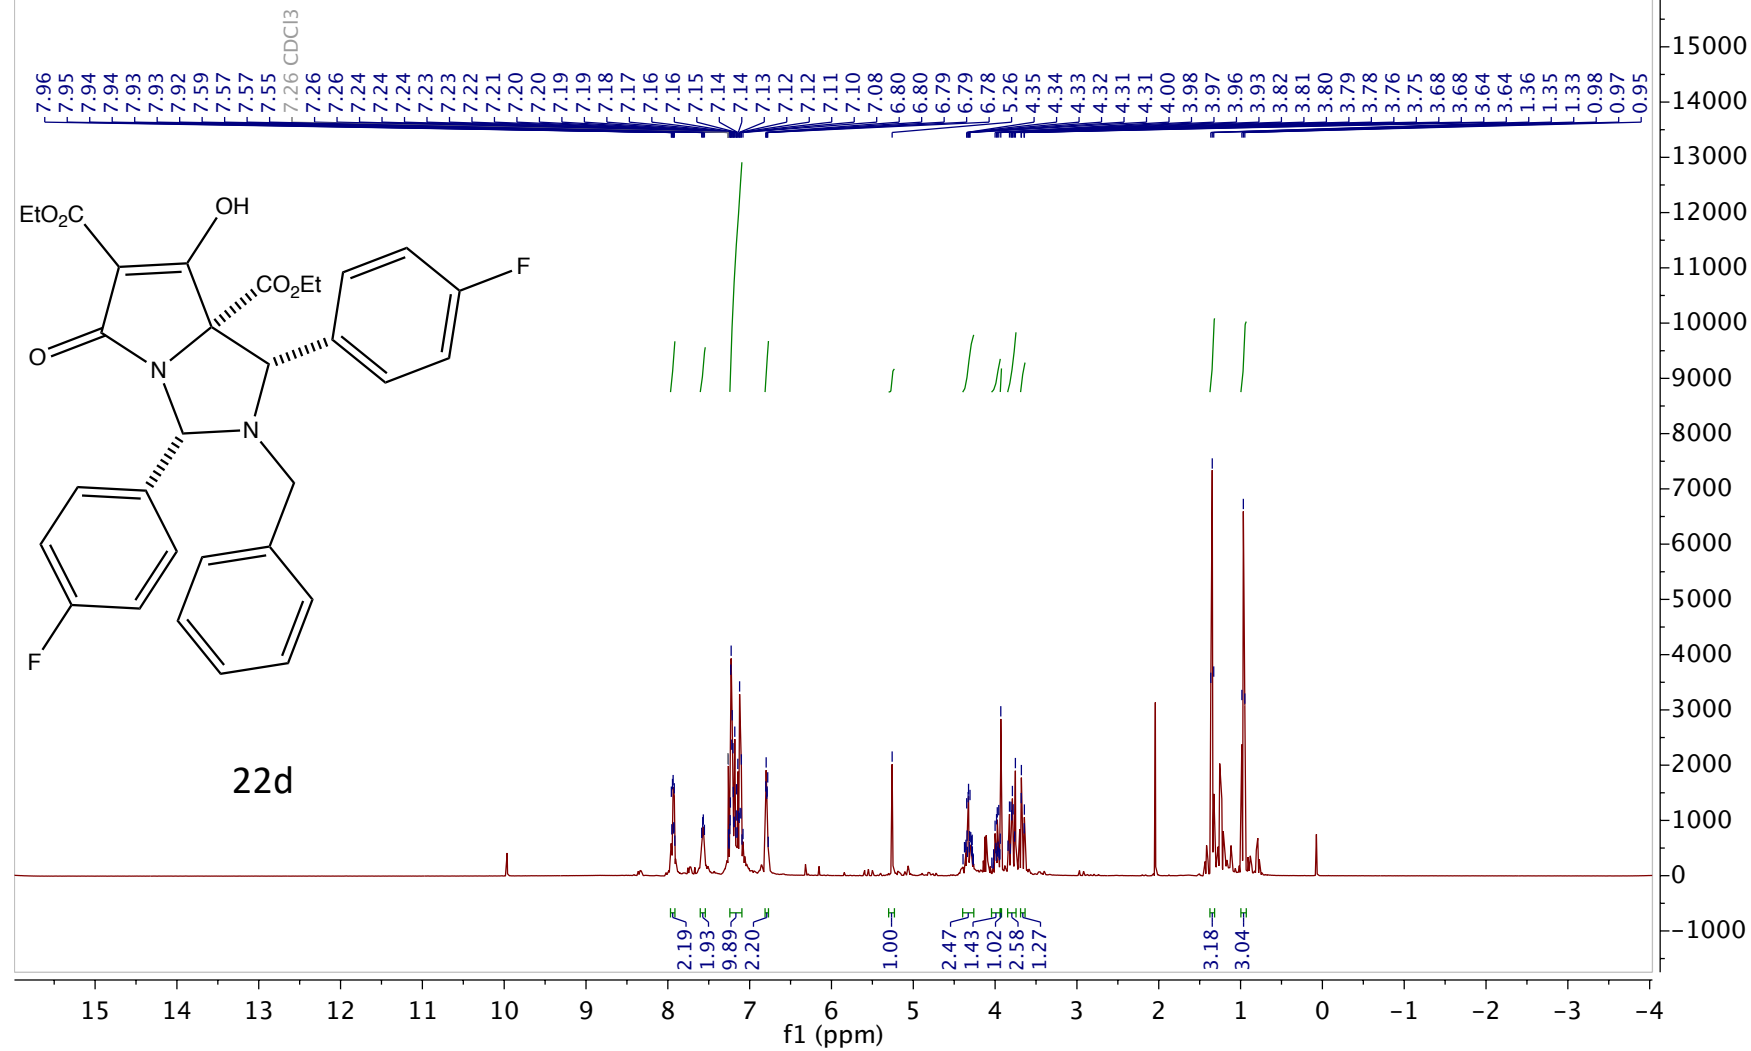

Mar29-2019-59-LS360(C).4.fid

Instrument AVF400

Chemist Liban Saney

Group MGM

Project Account Code DM7300

c13acq\_512.crl CDCl3 {C:\NMR} mgmgrp 59

$^{13}\text{C}$  NMR (101 MHz  $\text{CDCl}_3$ )

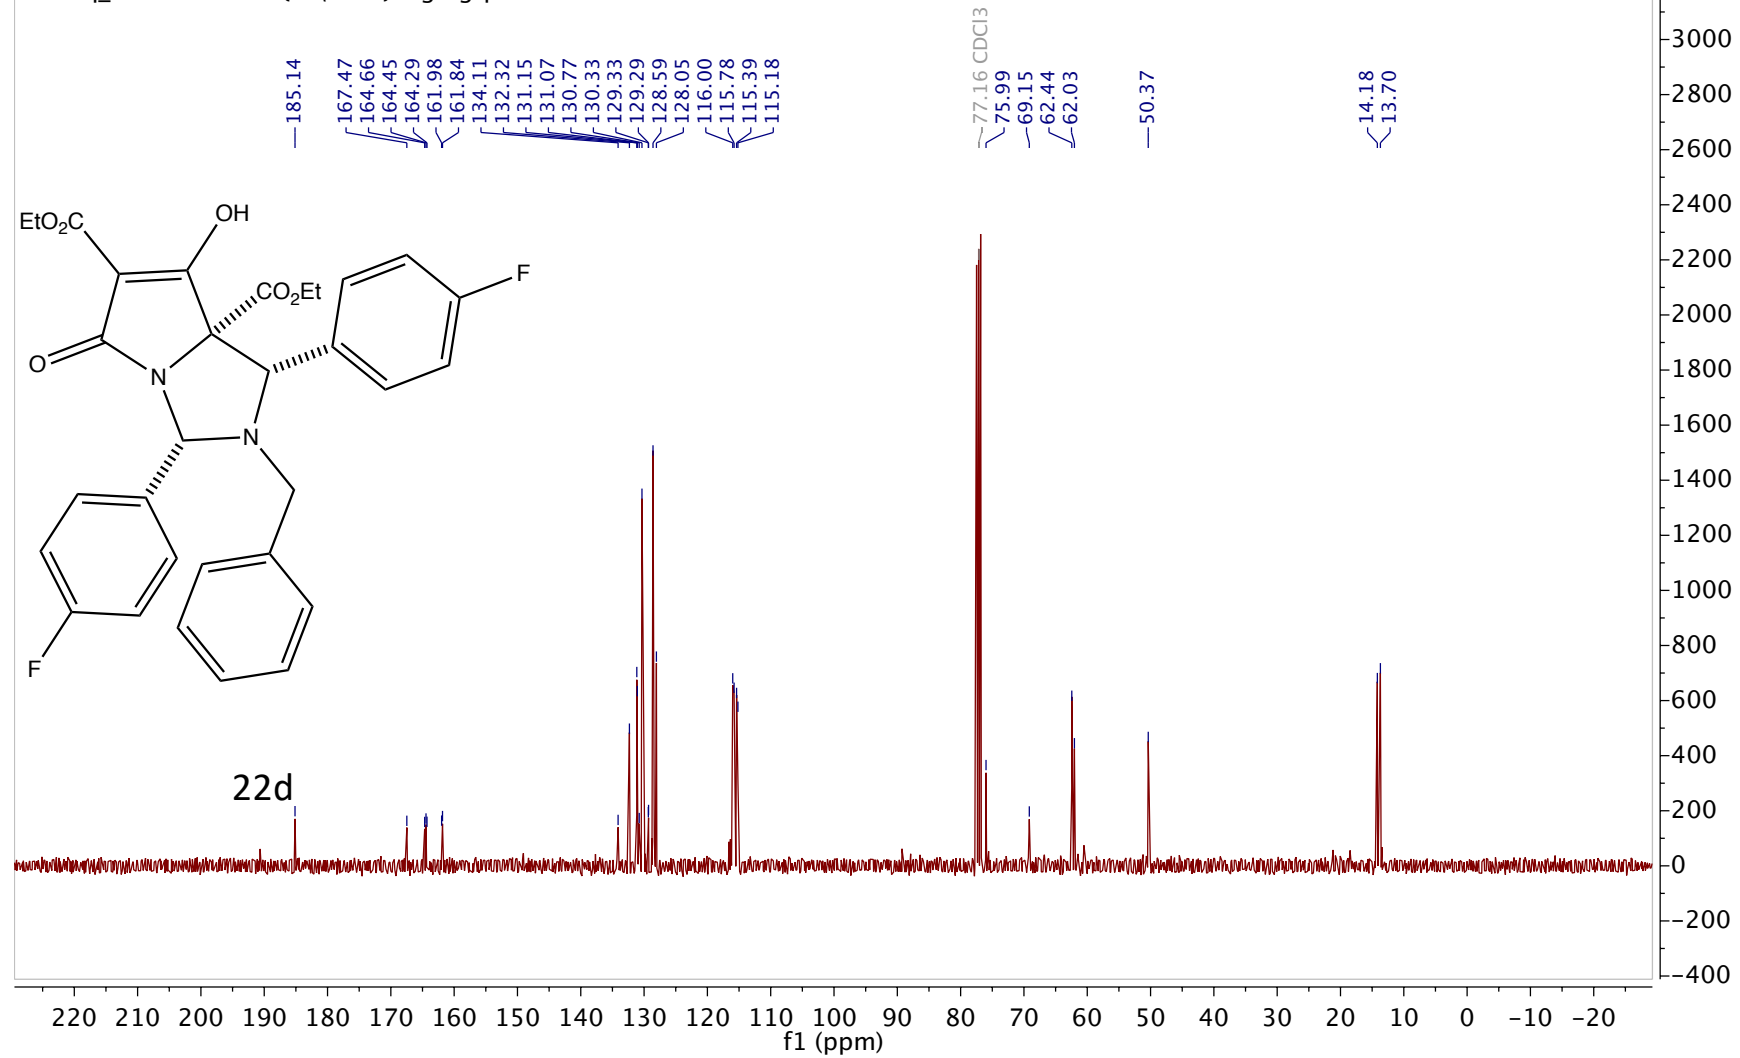

Mar29-2019-59-LS360(C).6.fid  
Instrument AVF400  
Chemist Liban Saney  
Group MGM  
Project Account Code DM7300  
f19acq.crl CDCl3 {C:\NMR} mgmgrp 59

$^{19}\text{F}$  NMR (377 MHz  $\text{CDCl}_3$ )

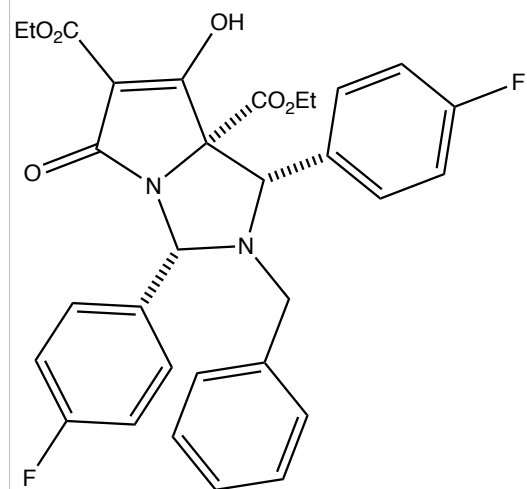

22d

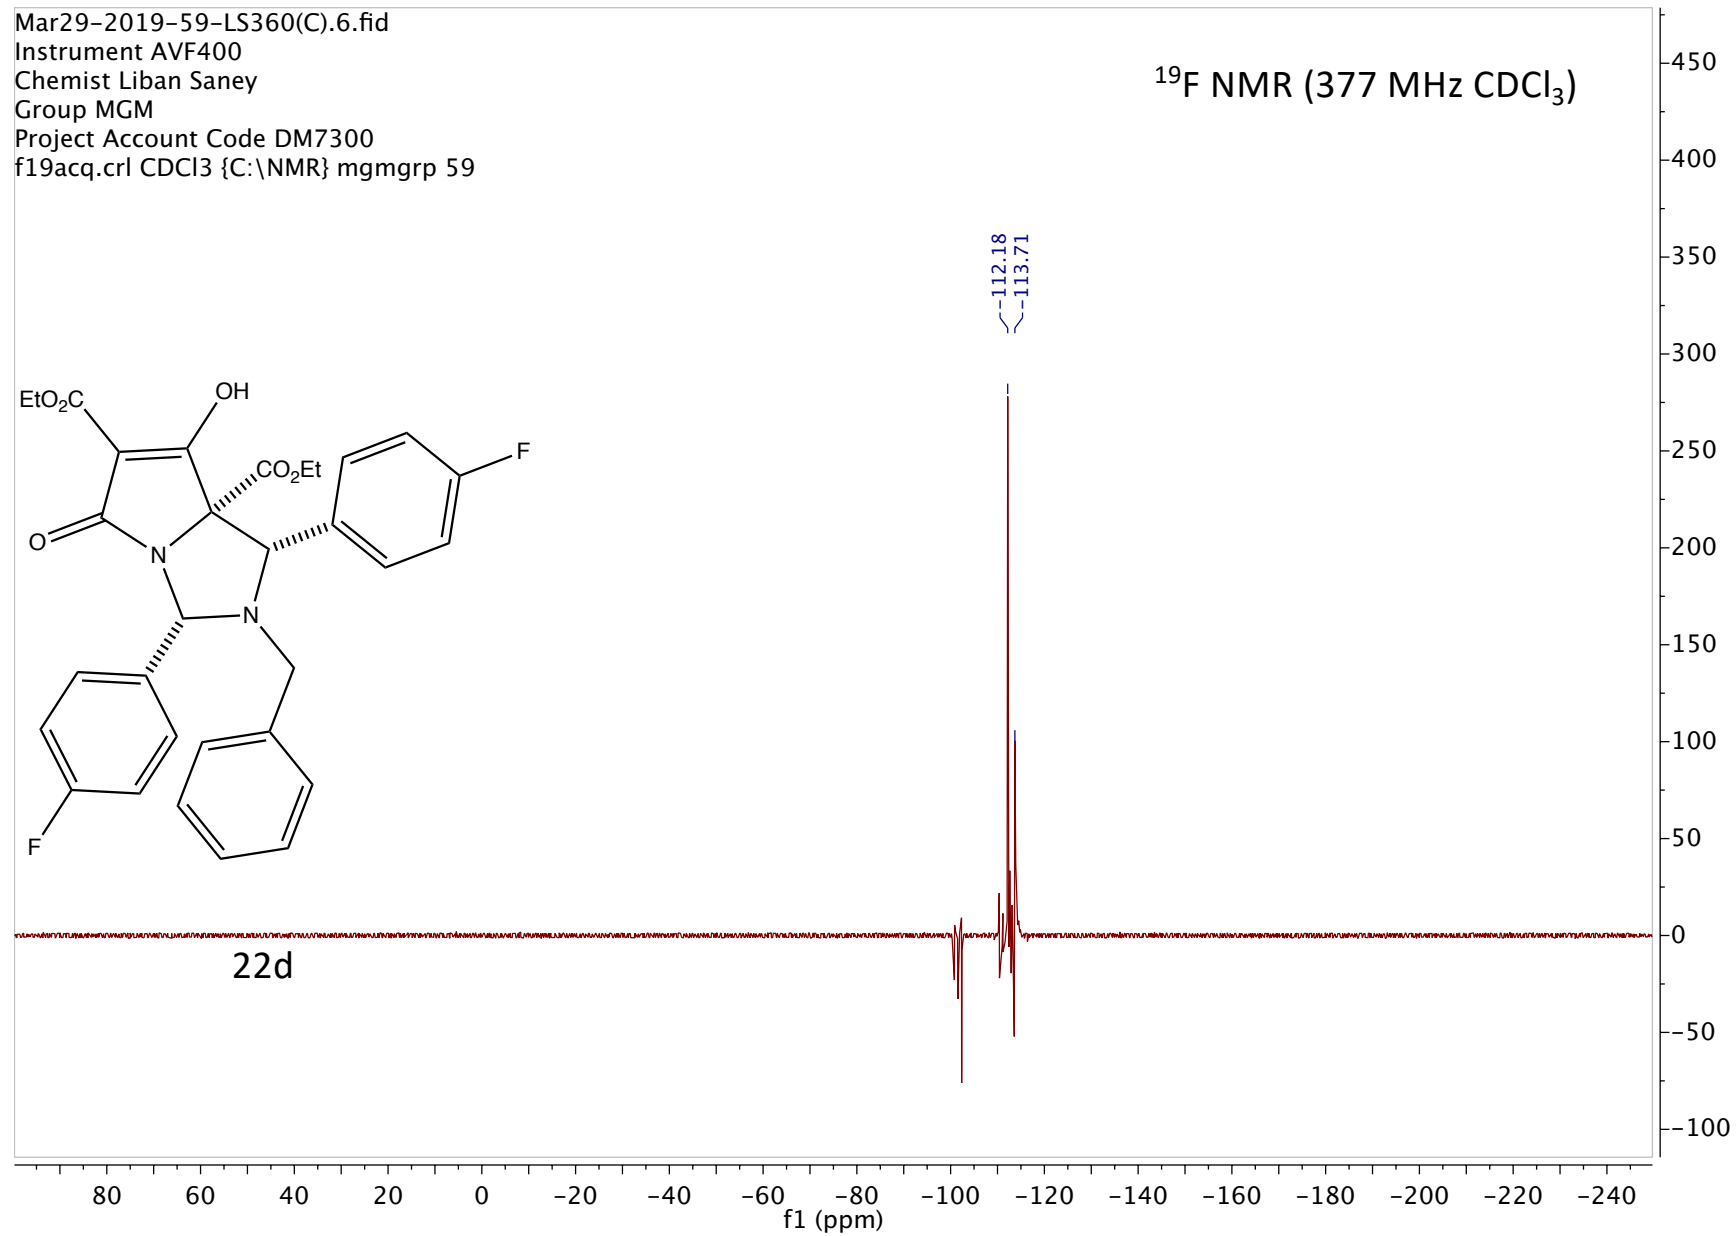



Jan16-2020-1-LS616(C).4.fid  
Instrument AVF400  
Chemist Liban Saney  
Group MGM  
Project Account Code DM7300  
c13acq\_512.crl CDCl3 {C:\NMR} mgmgrp 1

<sup>13</sup>C NMR (101 MHz CDCl<sub>3</sub>)

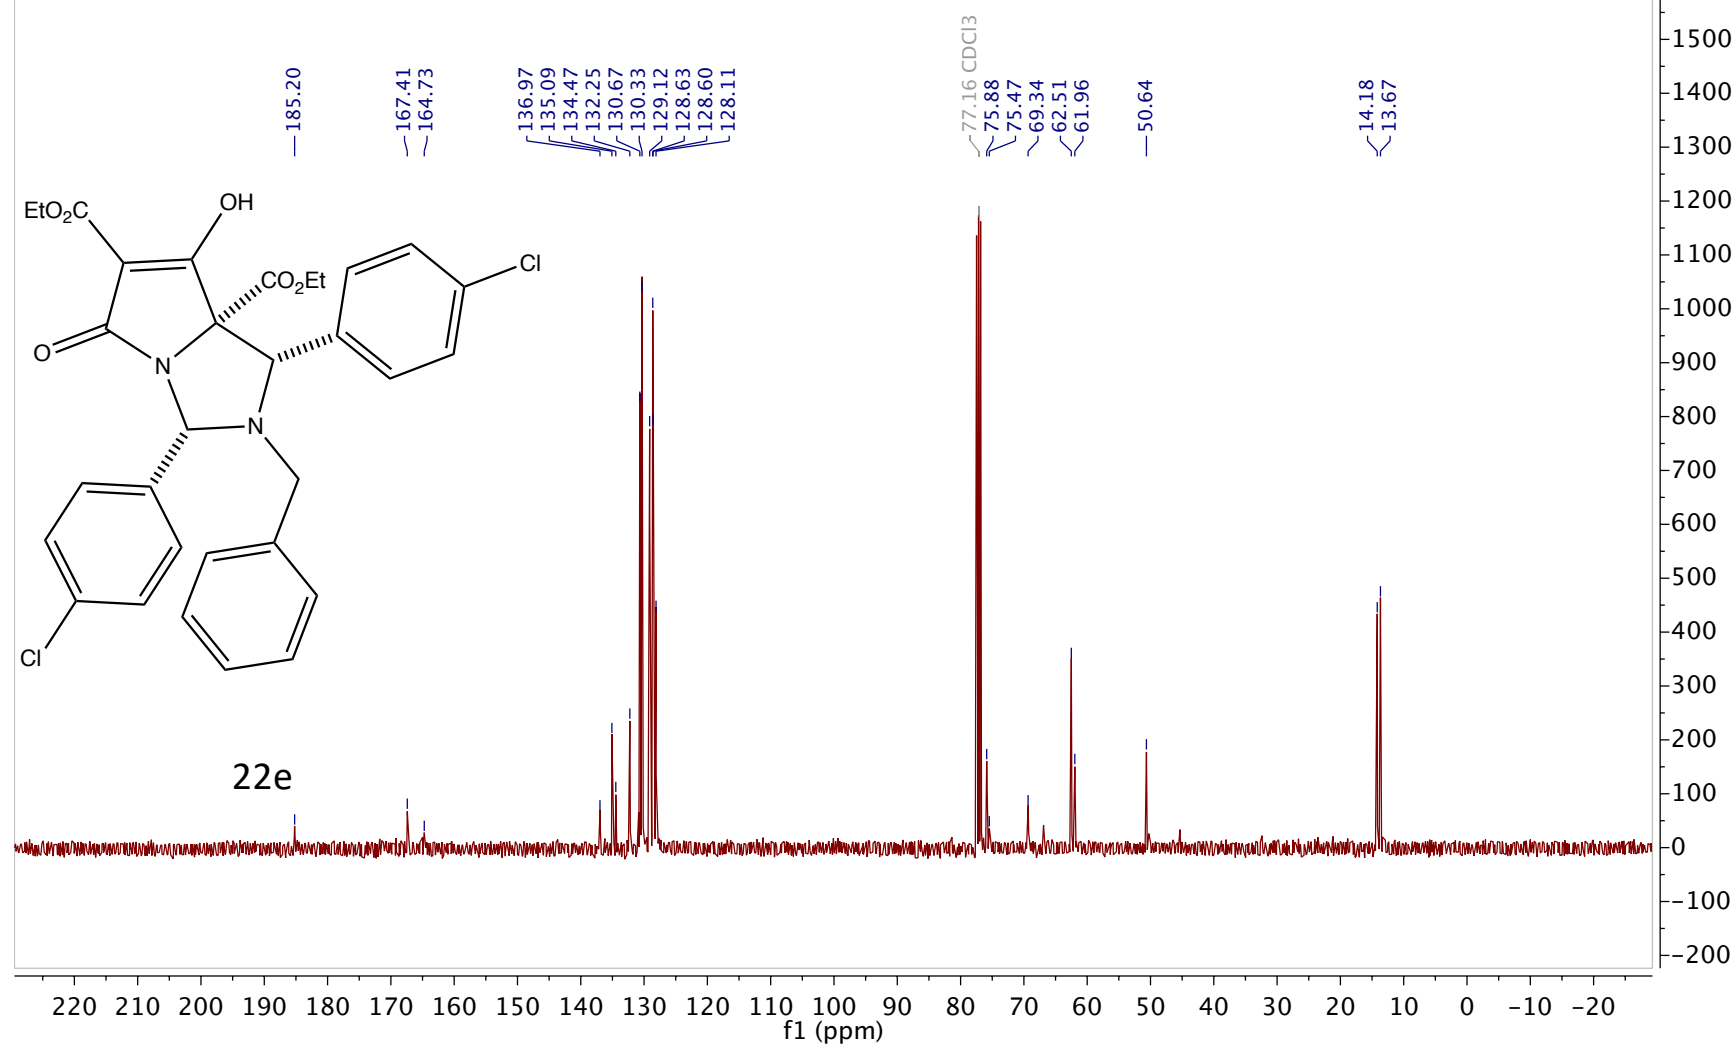

Apr11-2019-48-LS376(C).1.fid  
Instrument AVF400  
Chemist Liban Saney  
Group MGM  
Project Account Code DM7300  
h1acq.crl CDCl3 {C:\NMR} mgmgrp 48

<sup>1</sup>H NMR (400 MHz CDCl<sub>3</sub>)

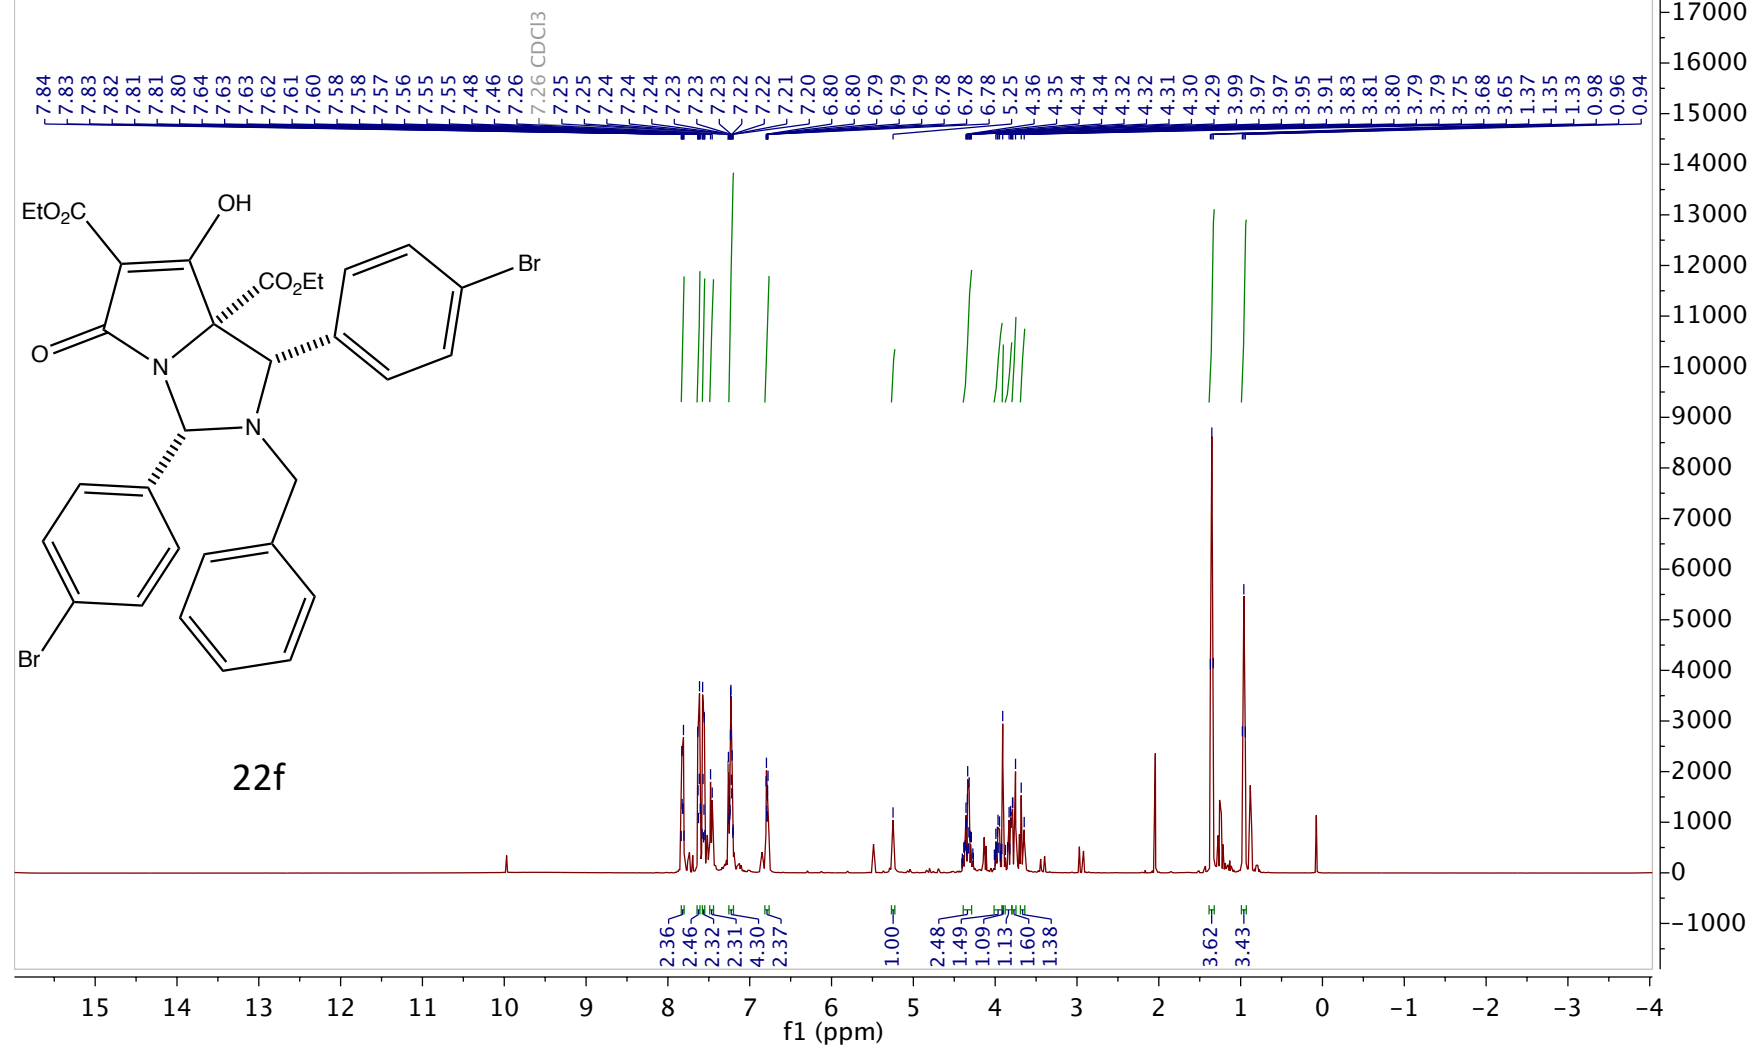

Apr11-2019-48-LS376(C).4.fid

Instrument AVF400

Chemist Liban Saney

Group MGM

Project Account Code DM7300

c13acq\_512.crl CDCl3 {C:\NMR} mgmgrp 48

$^{13}\text{C}$  NMR (101 MHz  $\text{CDCl}_3$ )

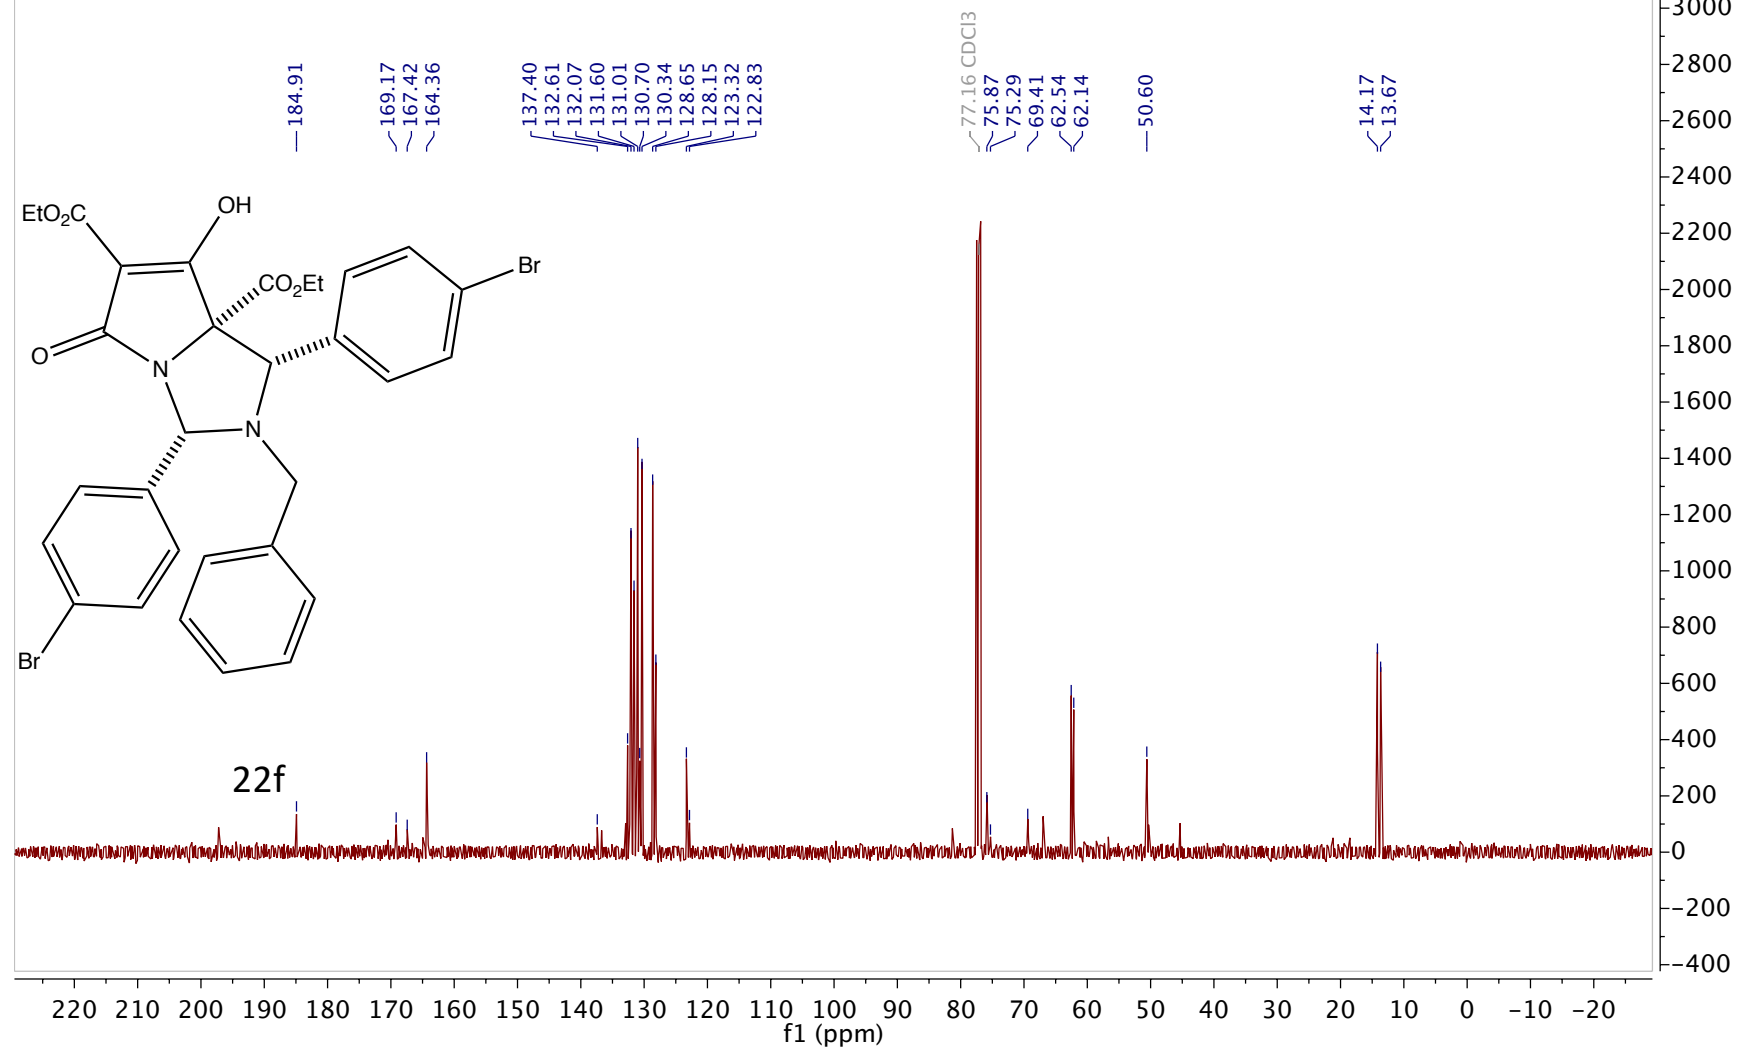



Jan16-2020-1-LS617(C).1.fid  
Instrument AVF400  
Chemist Liban Saney  
Group MGM  
Project Account Code DM7300  
h1acq.crl CDCl3 {C:\NMR} mgmgrp 1

<sup>1</sup>H NMR (400 MHz CDCl<sub>3</sub>)

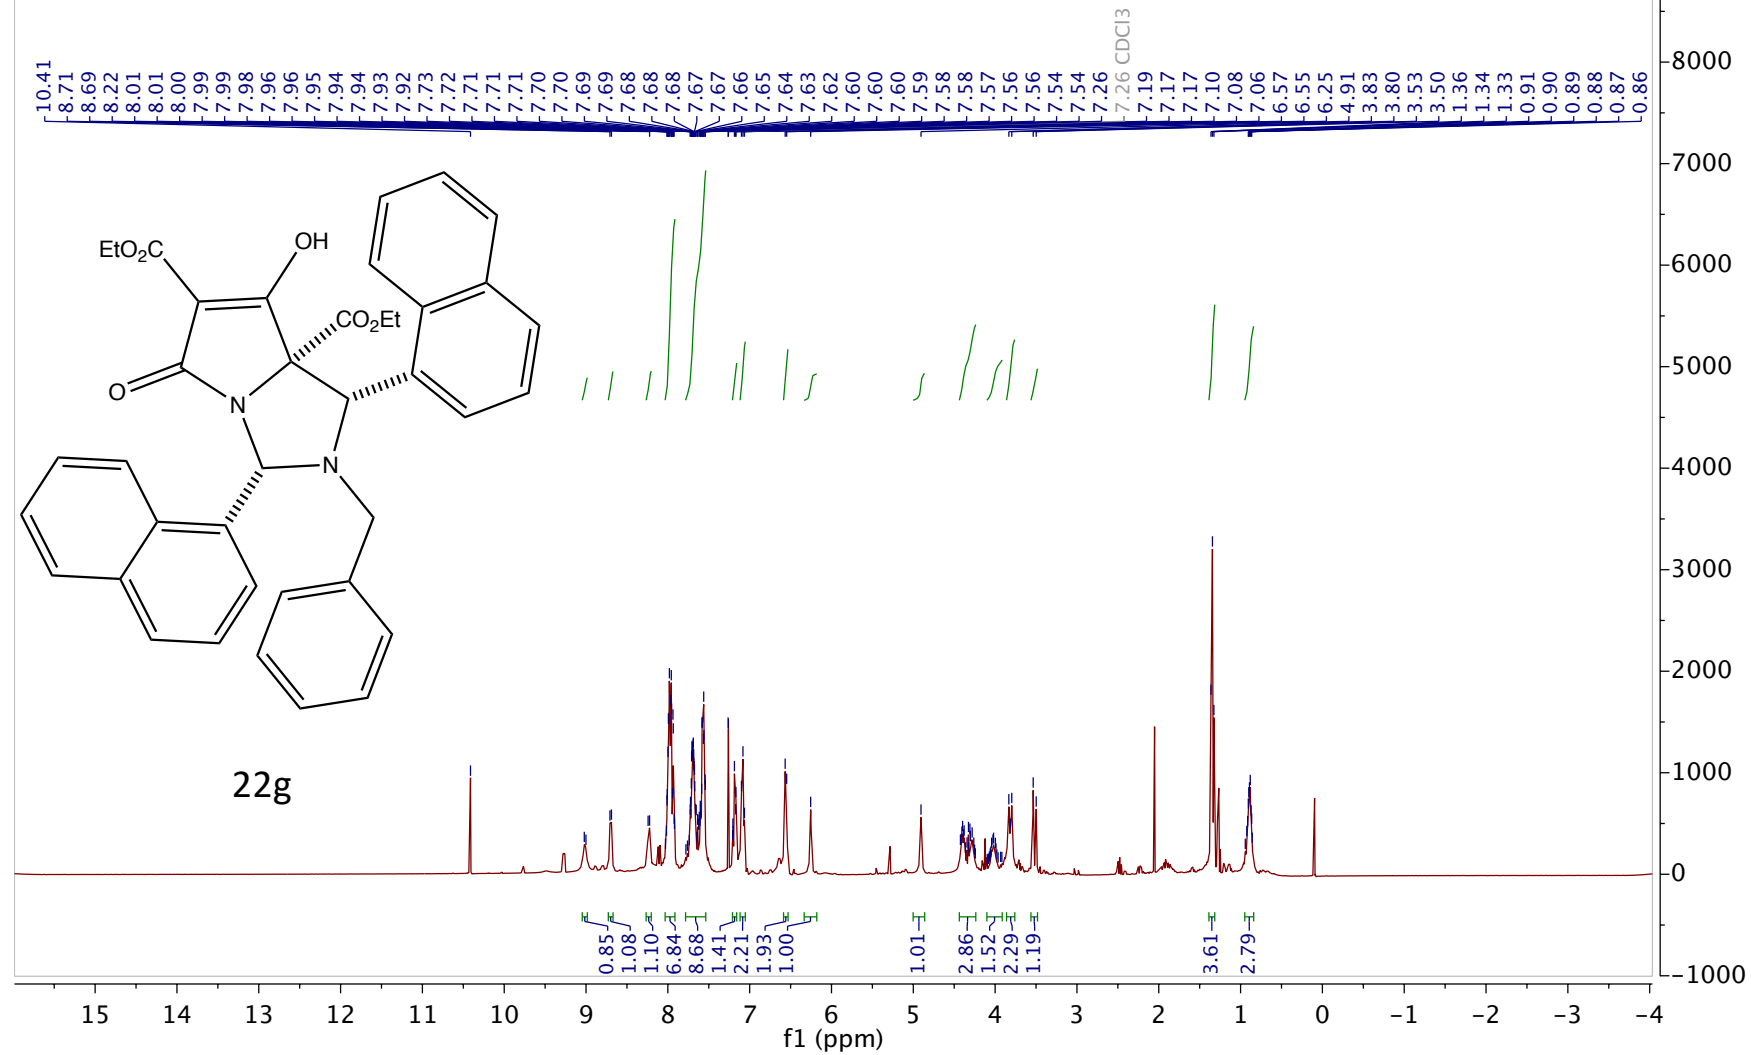

Jan16-2020-1-LS617(C).4.fid

Instrument AVF400

Chemist Liban Saney

Group MGM

Project Account Code DM7300

c13acq\_512.crl CDCl3 {C:\NMR} mgmgrp 1

$^{13}\text{C}$  NMR (101 MHz  $\text{CDCl}_3$ )

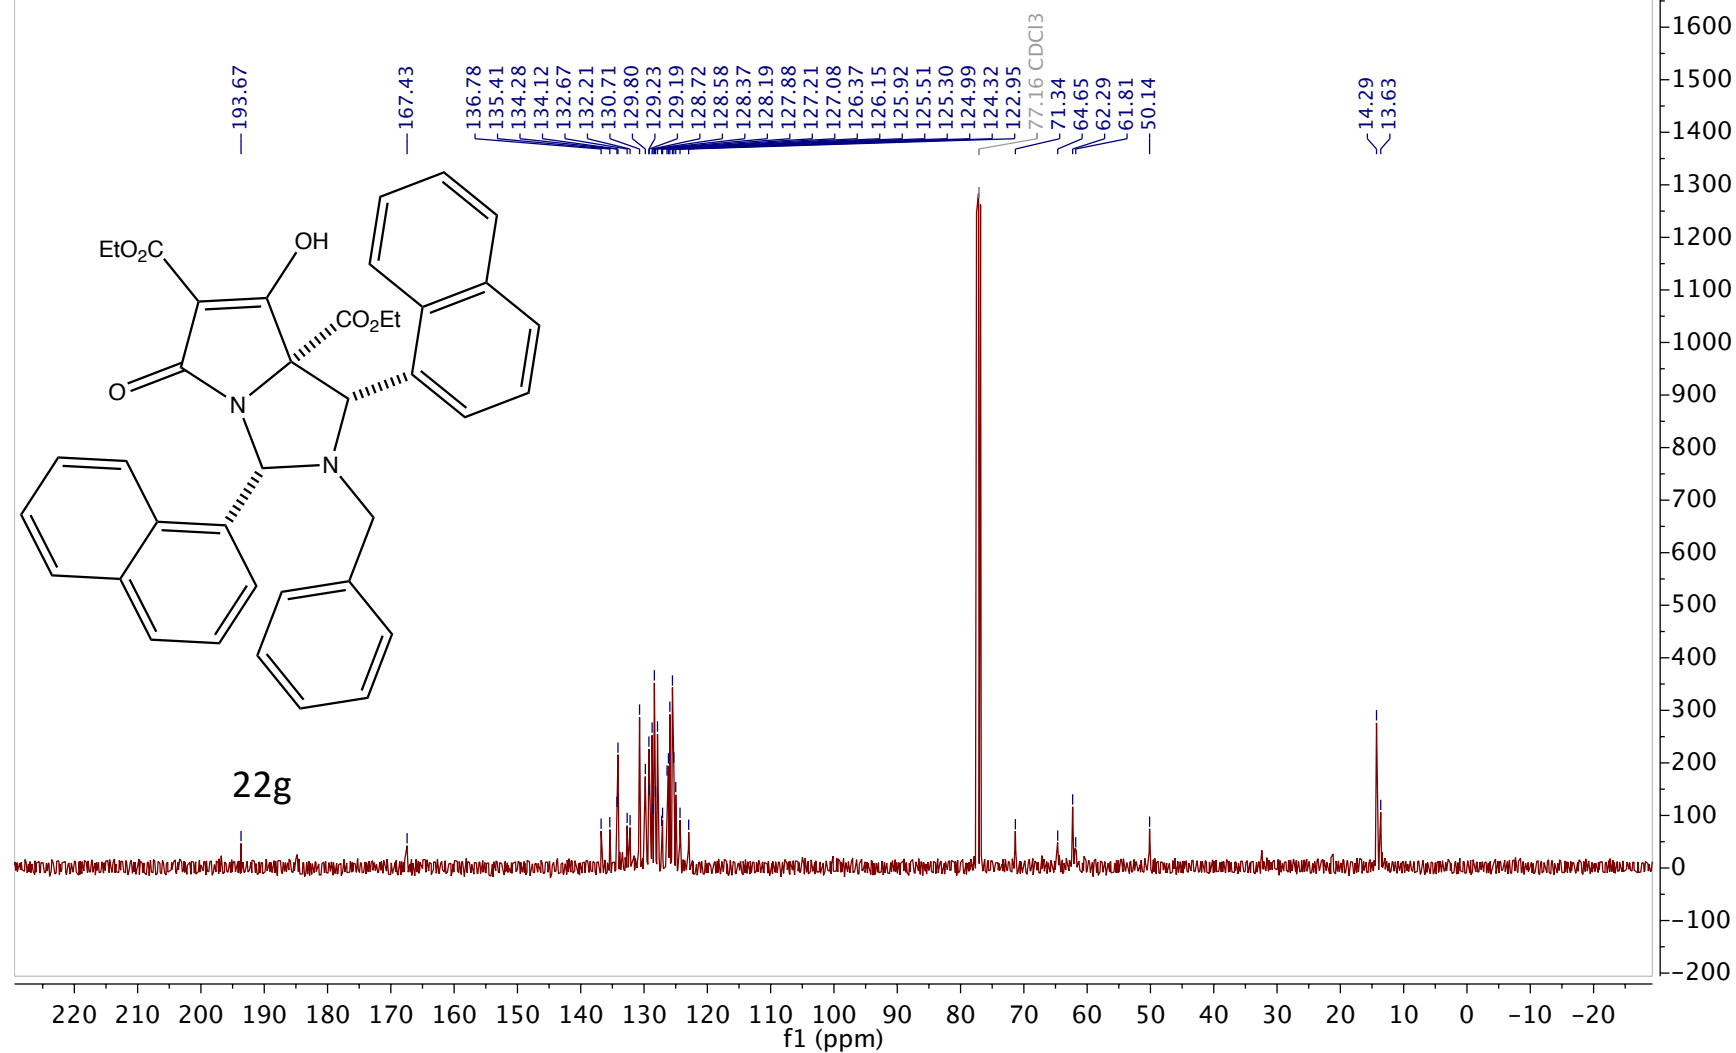

Sep26-2019-60-LS548(C).1.fid  
Instrument AVF400  
Chemist Liban Saney  
Group MGM  
Project Account Code DM7300  
h1acq.crl CDCl3 {C:\NMR} mgmgrp 60

<sup>1</sup>H NMR (400 MHz CDCl<sub>3</sub>)

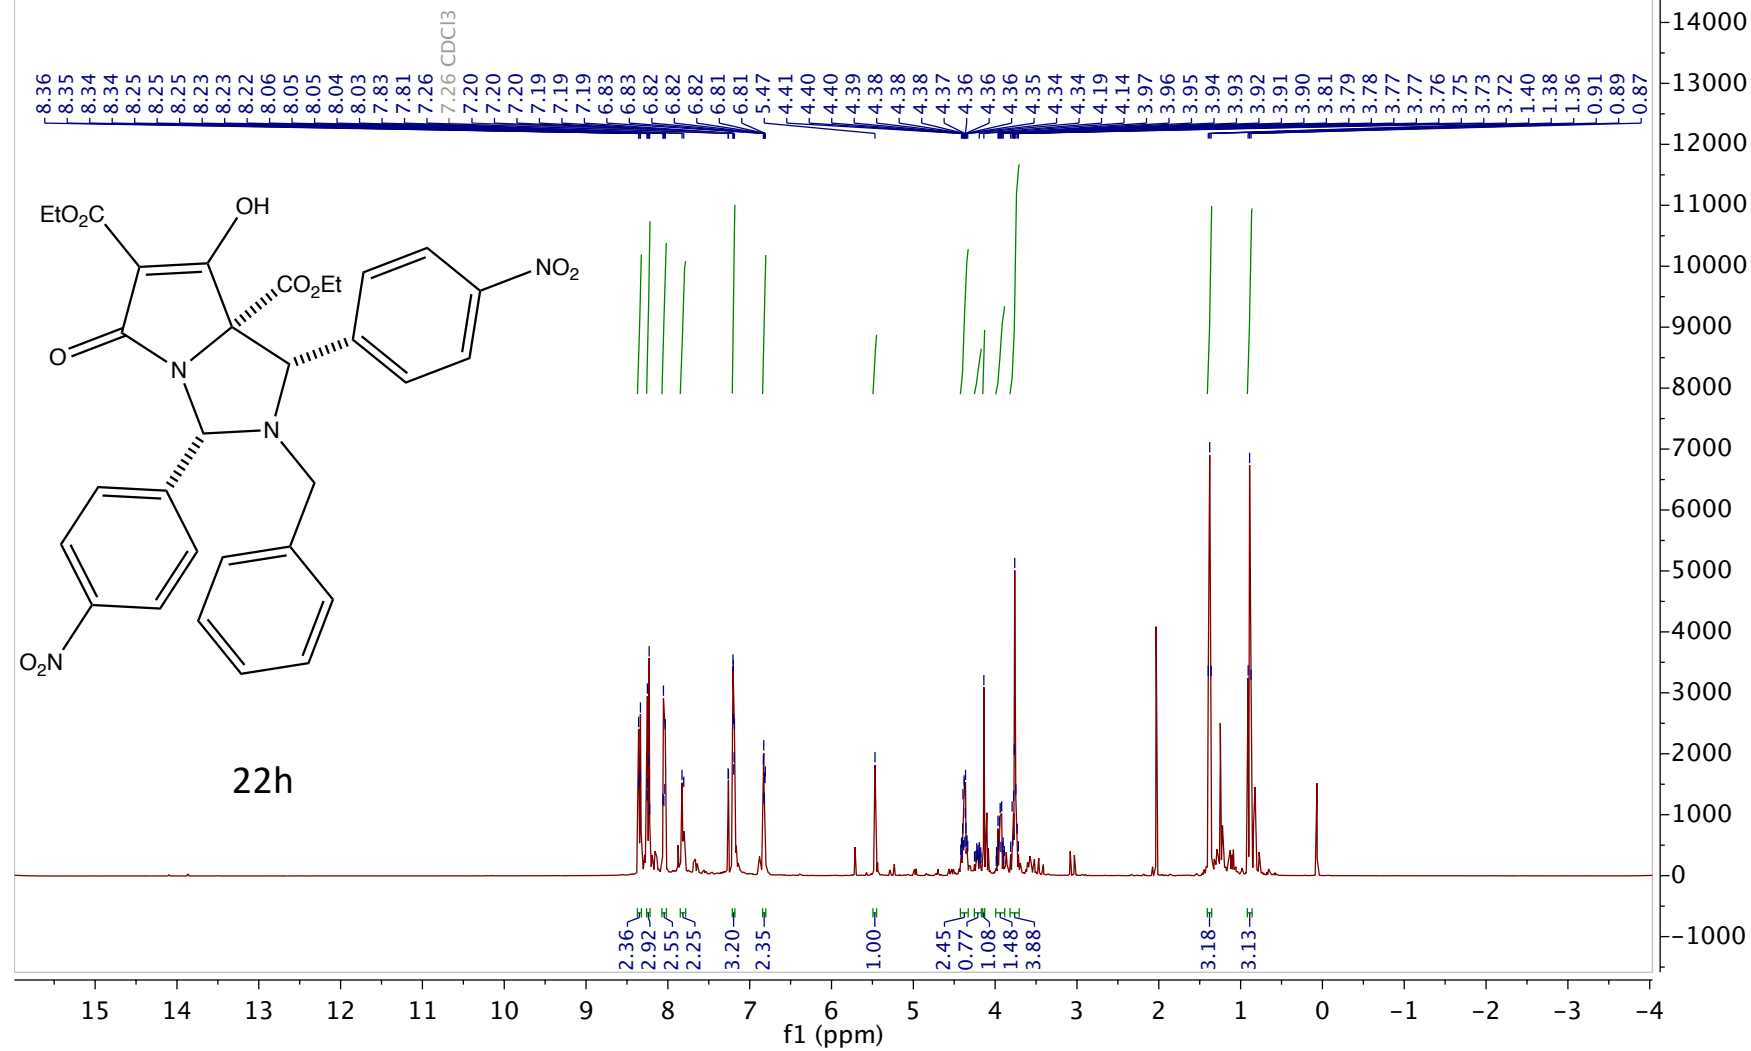

Sep26-2019-60-LS548(C).4.fid

Instrument AVF400

Chemist Liban Saney

Group MGM

Project Account Code DM7300

c13acq\_512.crl CDCl3 {C:\NMR} mgmgrp 60

$^{13}\text{C}$  NMR (101 MHz  $\text{CDCl}_3$ )

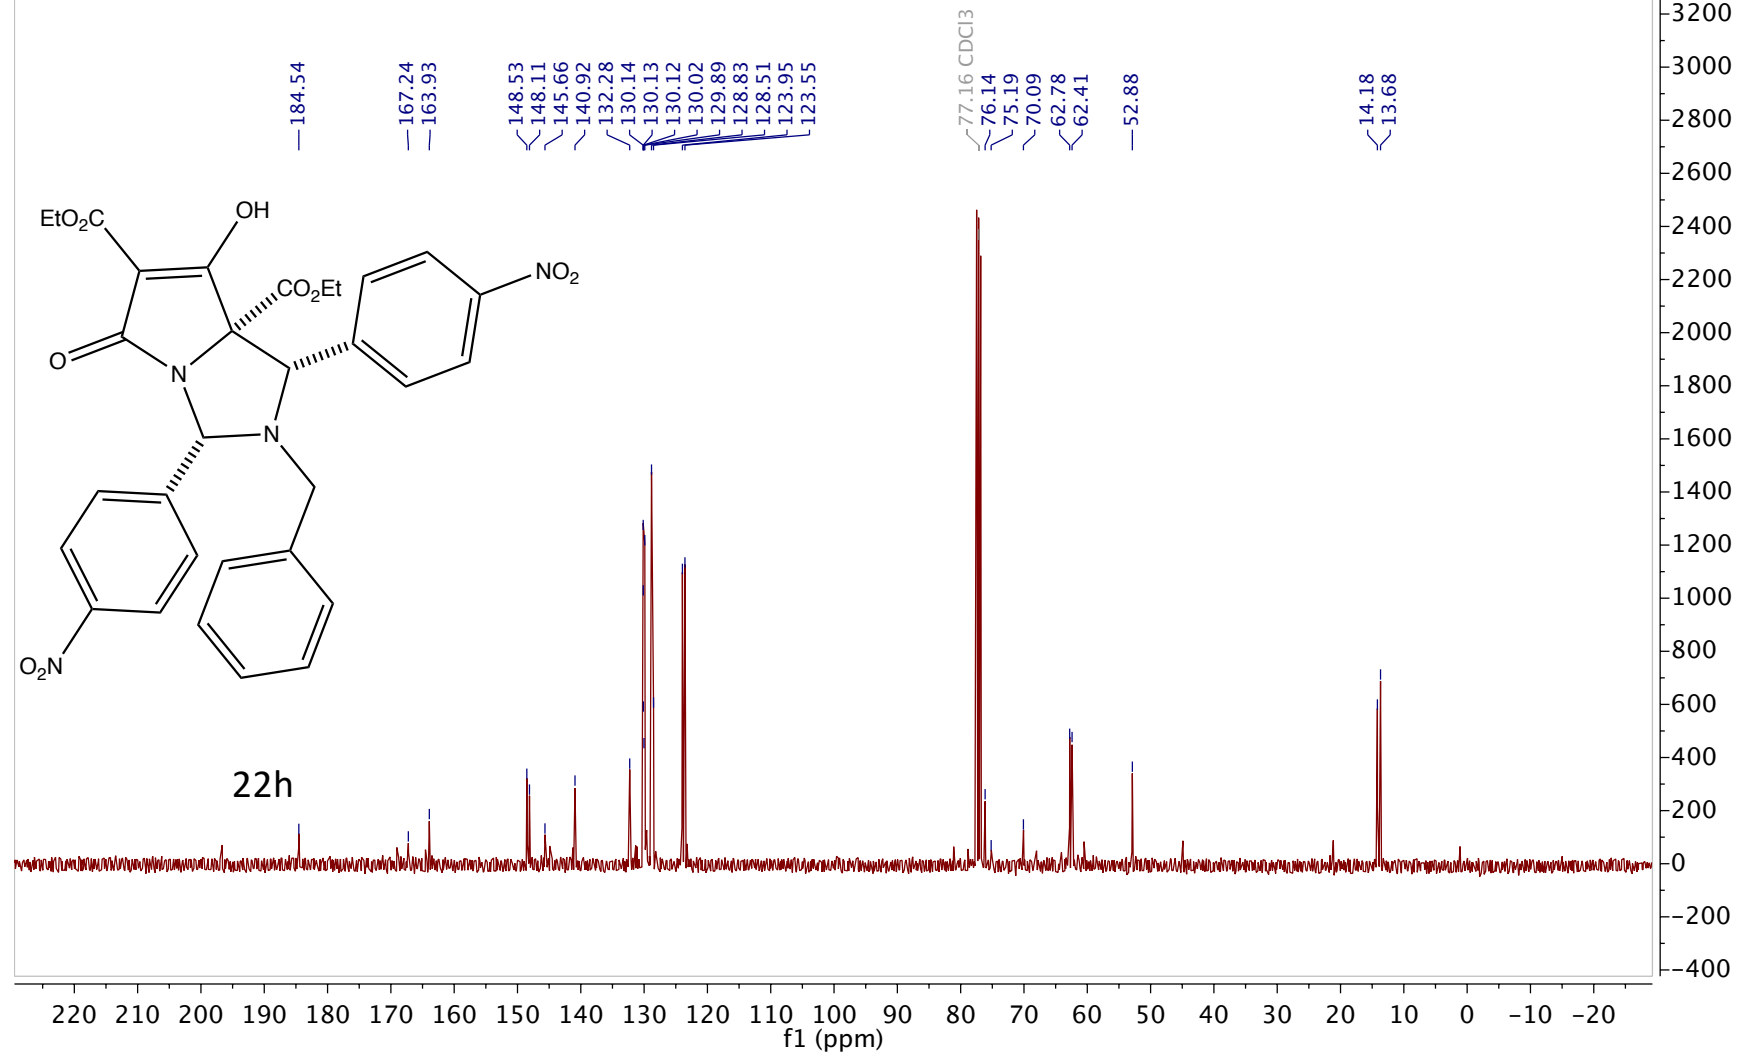

Jan25-2020-1-LS628(C).1.fid  
Instrument AVF400  
Chemist Liban Saney  
Group MGM  
Project Account Code DM7300  
h1acq.crl CDCl3 {C:\NMR} mgmgrp 1

<sup>1</sup>H NMR (400 MHz CDCl<sub>3</sub>)

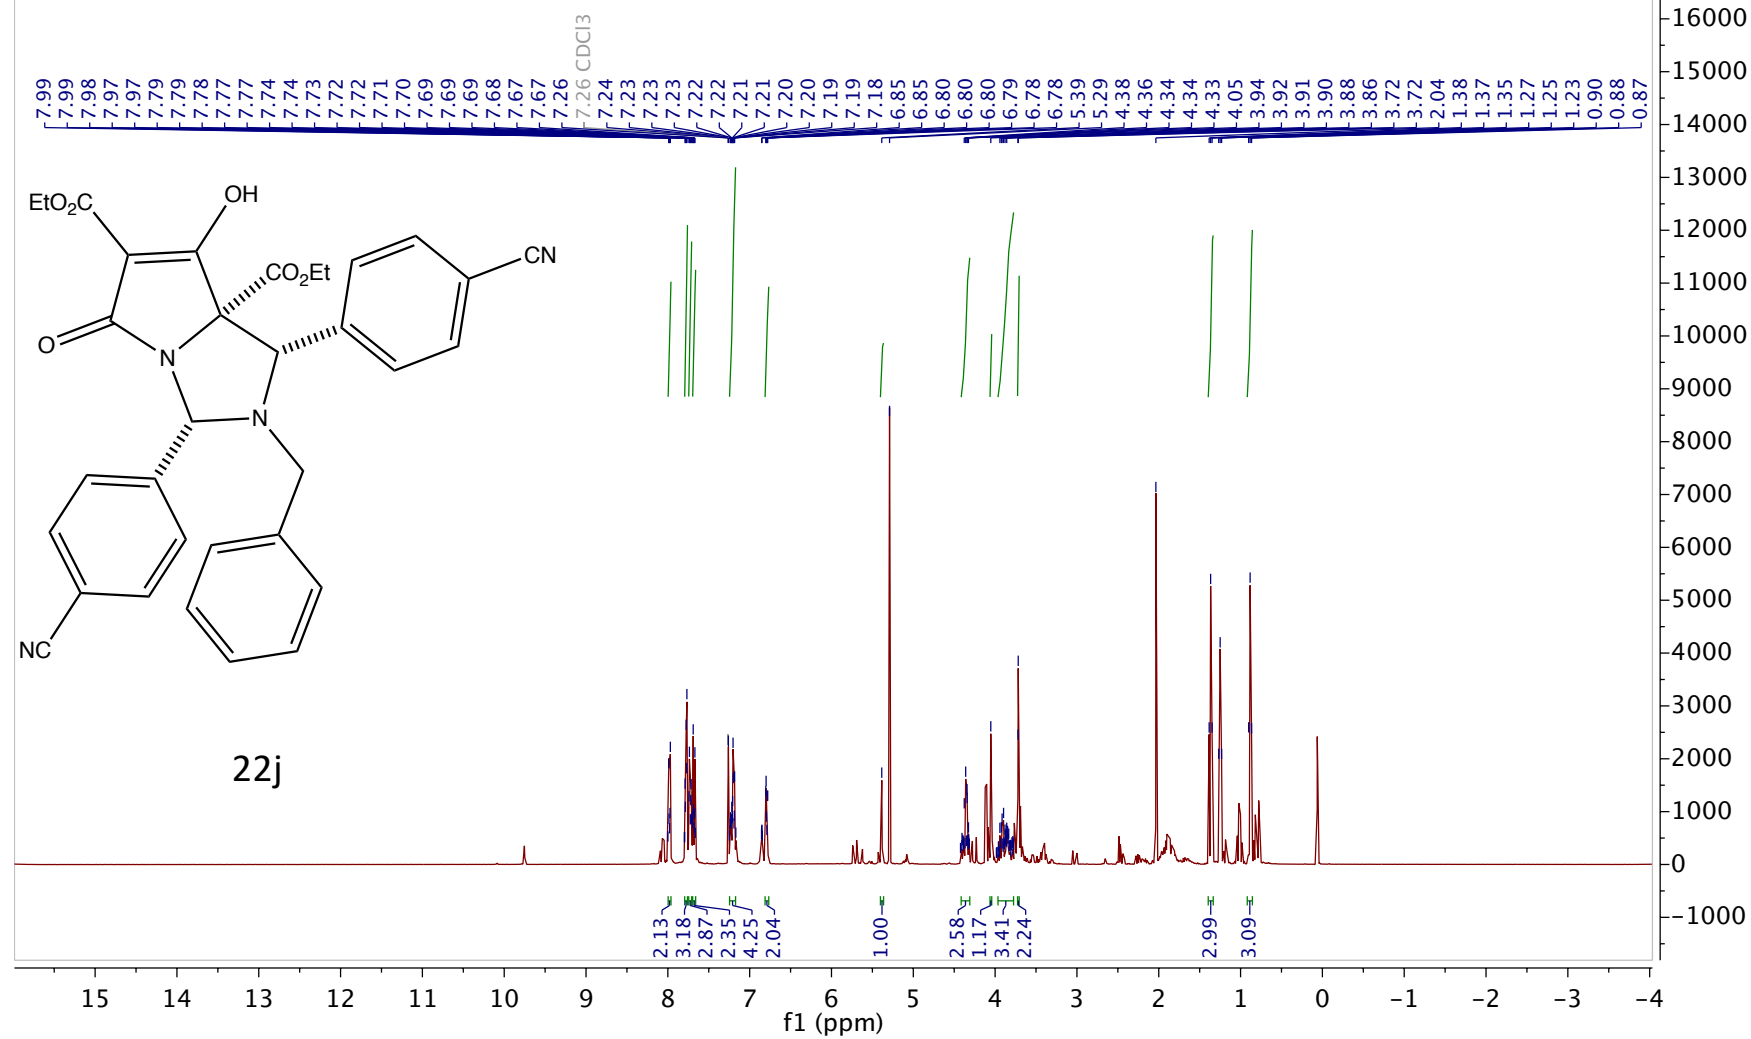

Jan25-2020-1-LS628(C).5.fid

Instrument AVF400

Chemist Liban Saney

Group MGM

Project Account Code DM7300

c13acq\_512.crl CDCl3 {C:\NMR} mgmgrp 1

$^{13}\text{C}$  NMR (101 MHz  $\text{CDCl}_3$ )

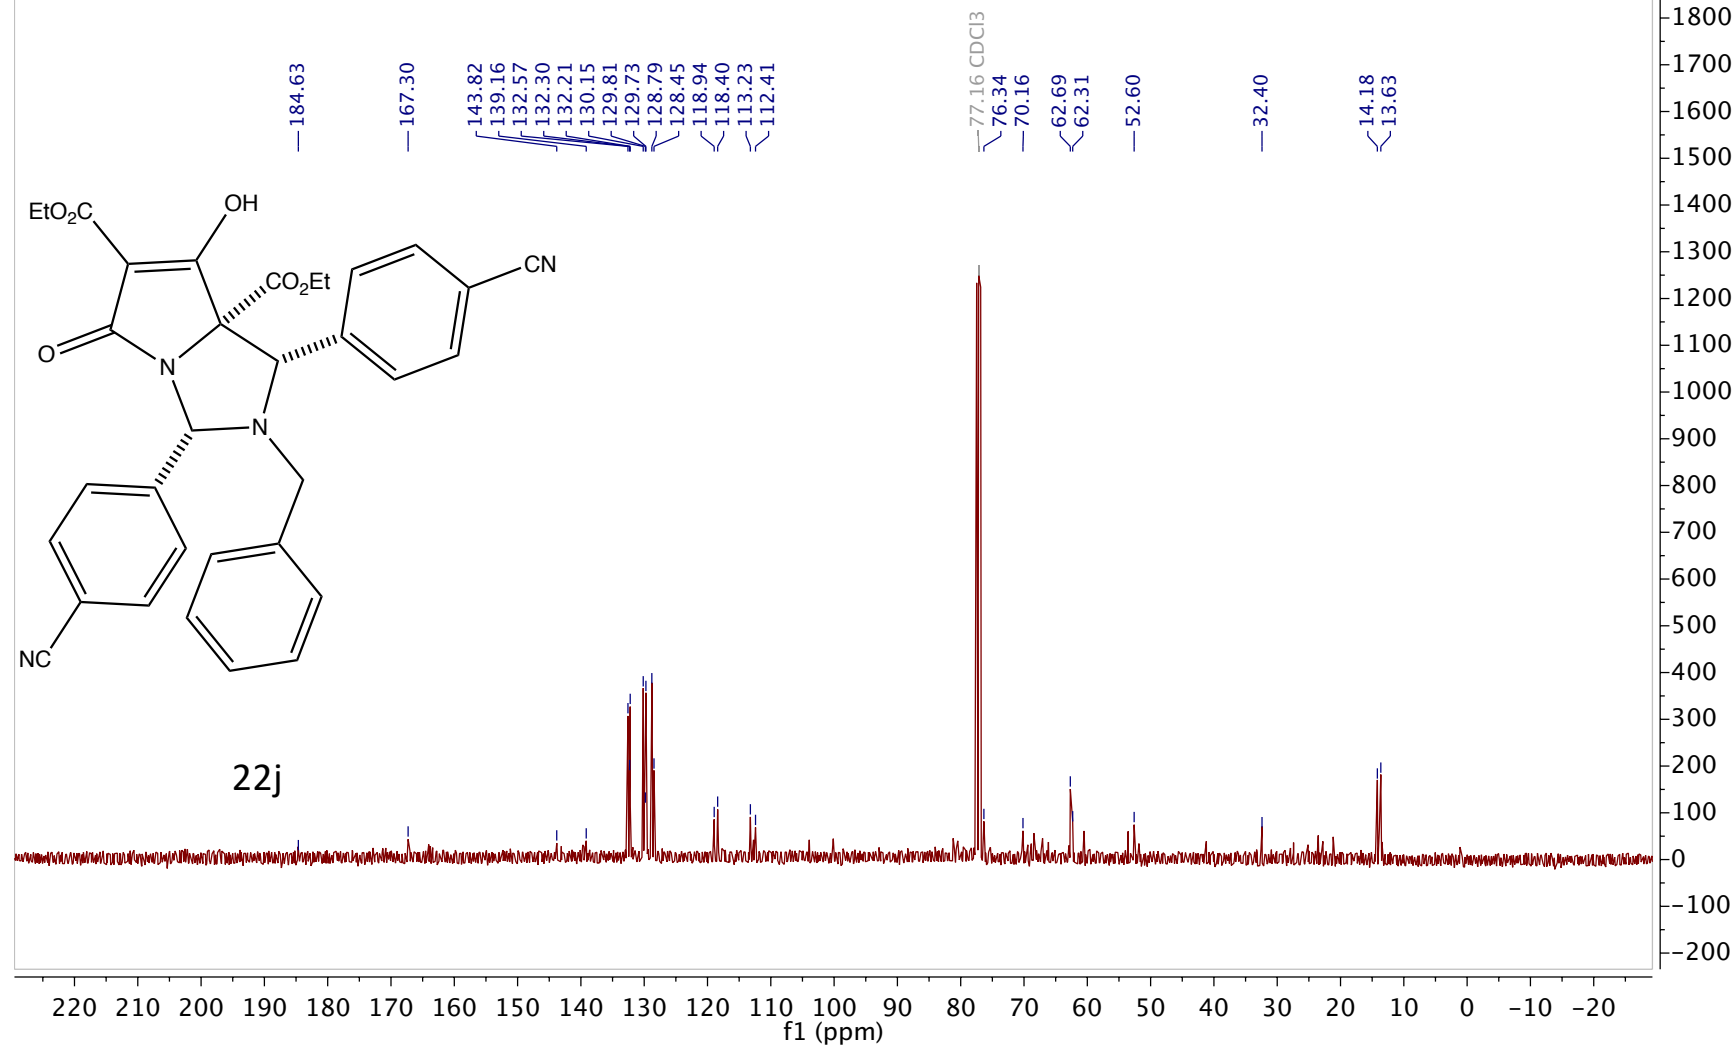

Jan29-2020-34-LS633(C).1.fid  
Instrument AVG400  
Group MGM  
Chemist Liban Saney  
Project Account Code DM7300  
h1acq.crl CDCl3 {C:\NMR} mgmgrp 34

<sup>1</sup>H NMR (400 MHz CDCl<sub>3</sub>)

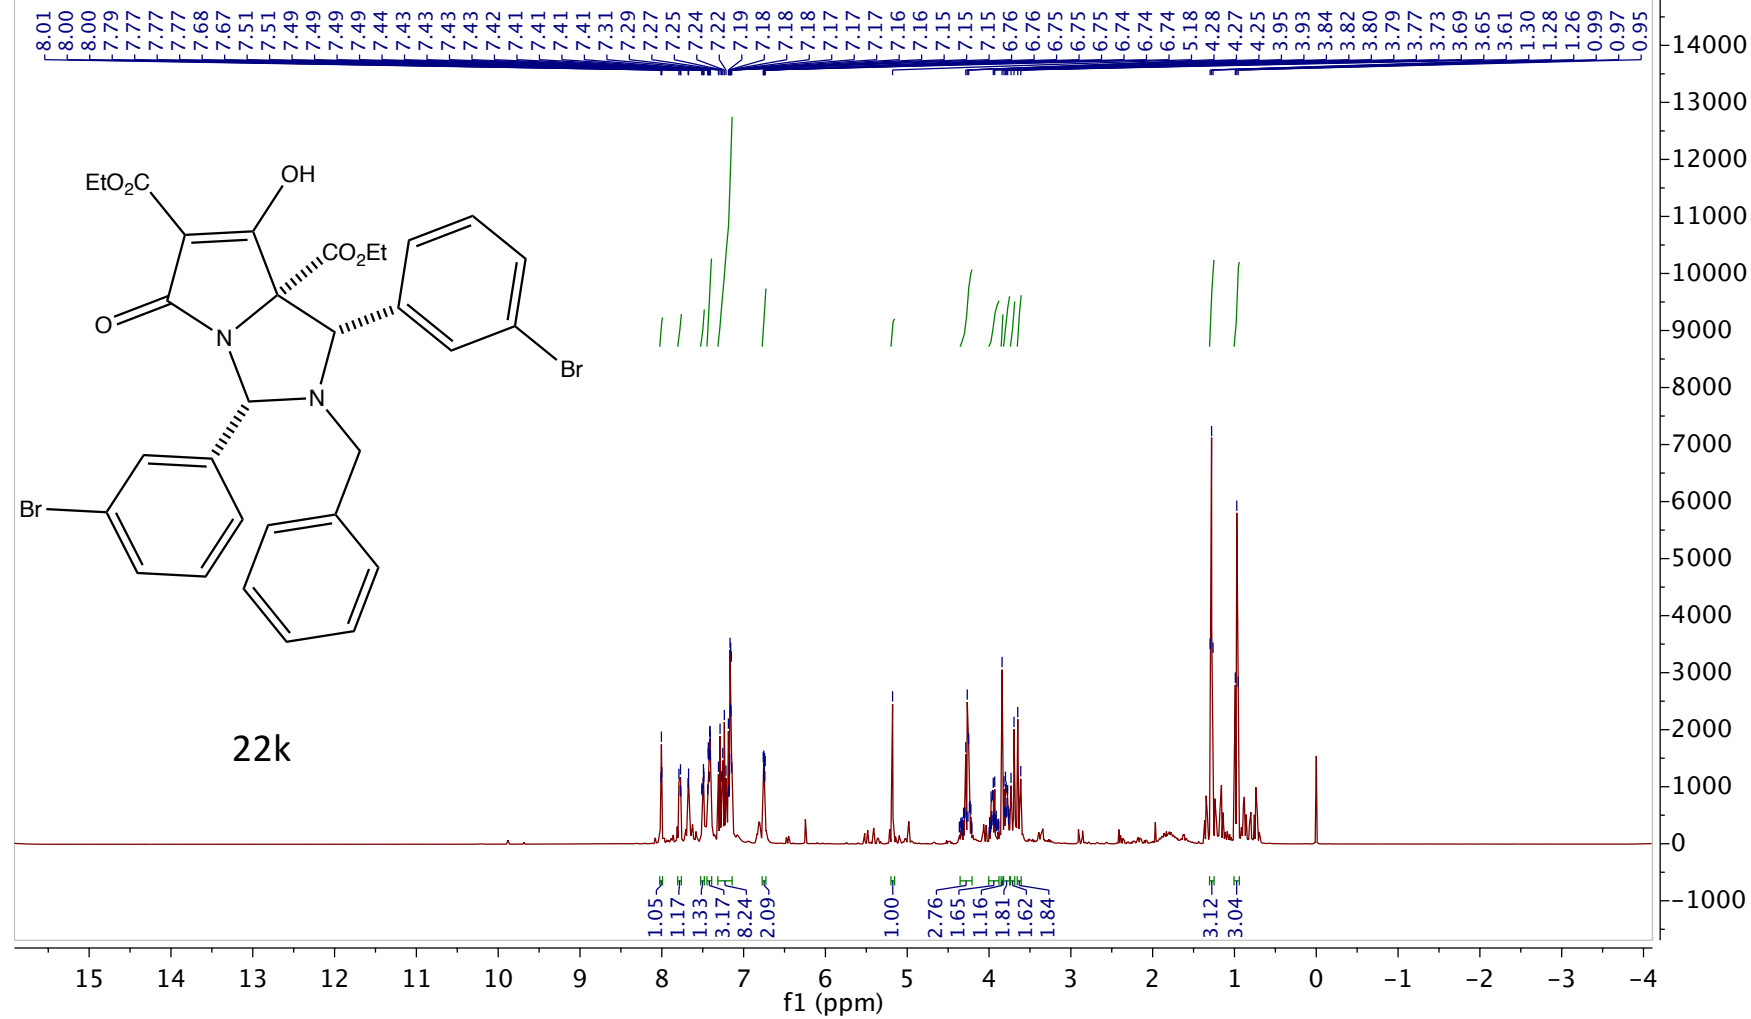

Jan29-2020-34-LS633(C).4.fid

Instrument AVG400

Group MGM

Chemist Liban Saney

Project Account Code DM7300

c13acq\_512.crl CDCl3 {C:\NMR} mgmgrp 34

<sup>13</sup>C NMR (101 MHz CDCl<sub>3</sub>)

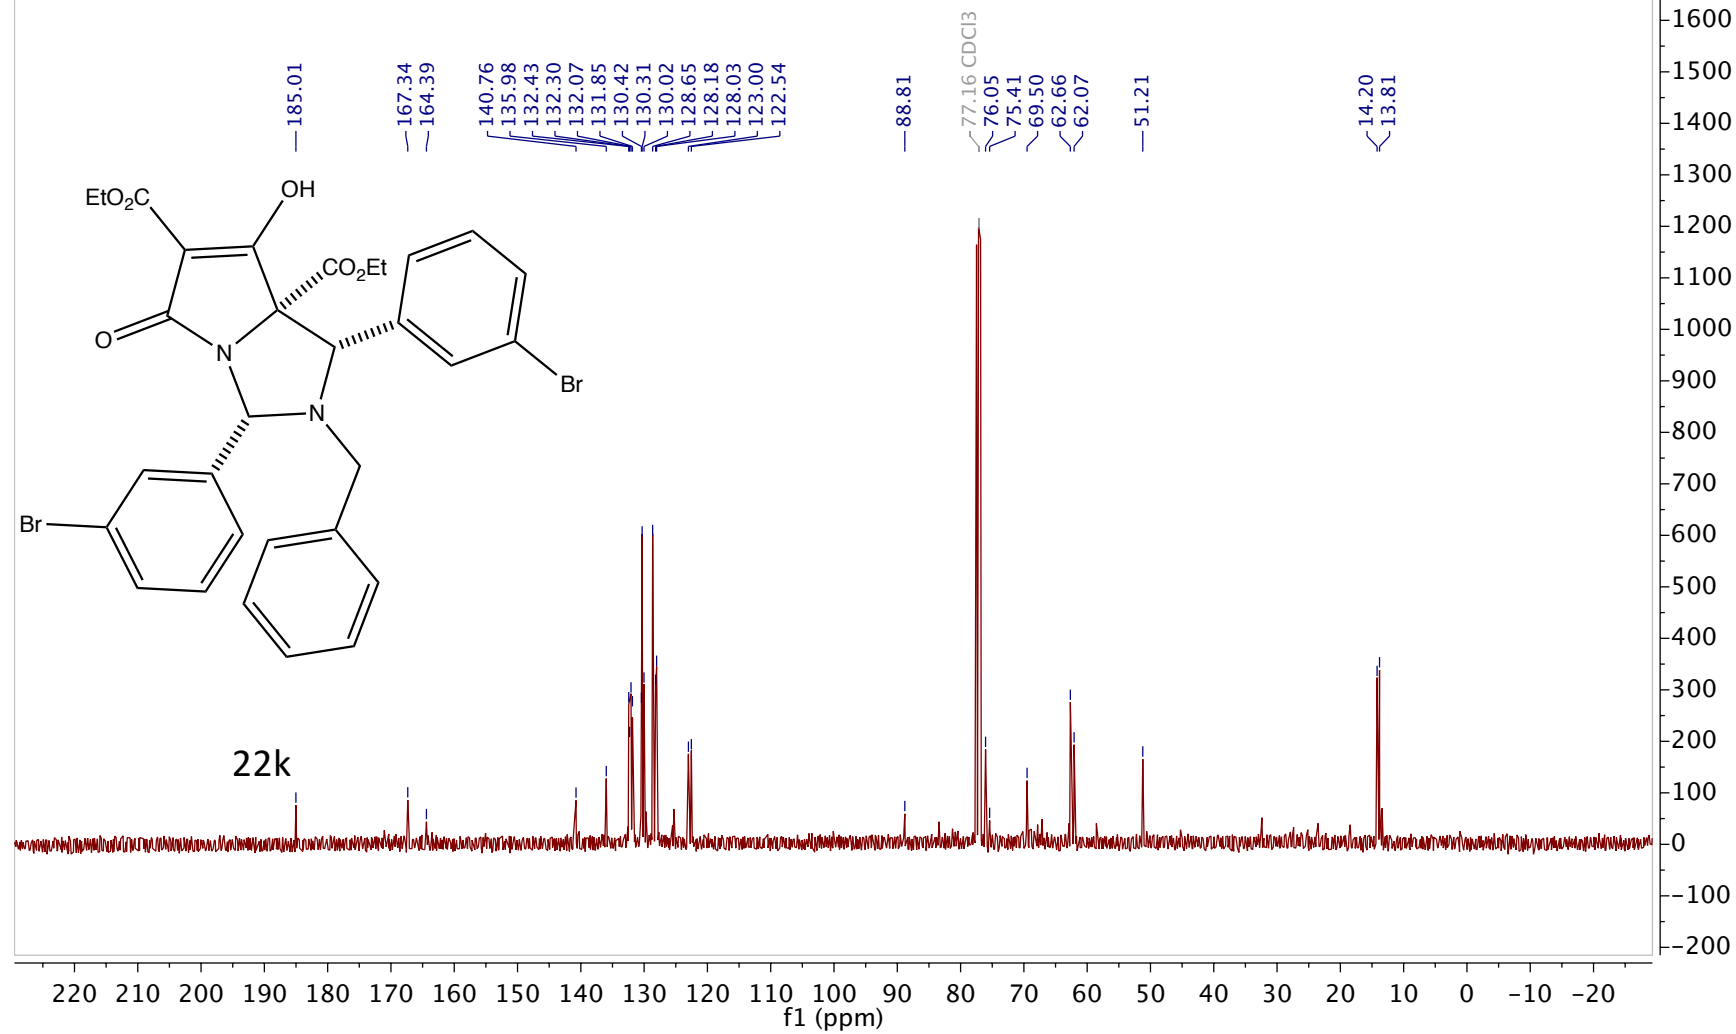



Mar24-2019-60-LS345(P) B5-B12.2.fid  
Instrument AVF400  
Chemist Liban Saney  
Group MGM  
Project Account Code DM7300  
h1acq.crl CDCl3 {C:\NMR} mgmgrp 60

<sup>1</sup>H NMR (400 MHz CDCl<sub>3</sub>)

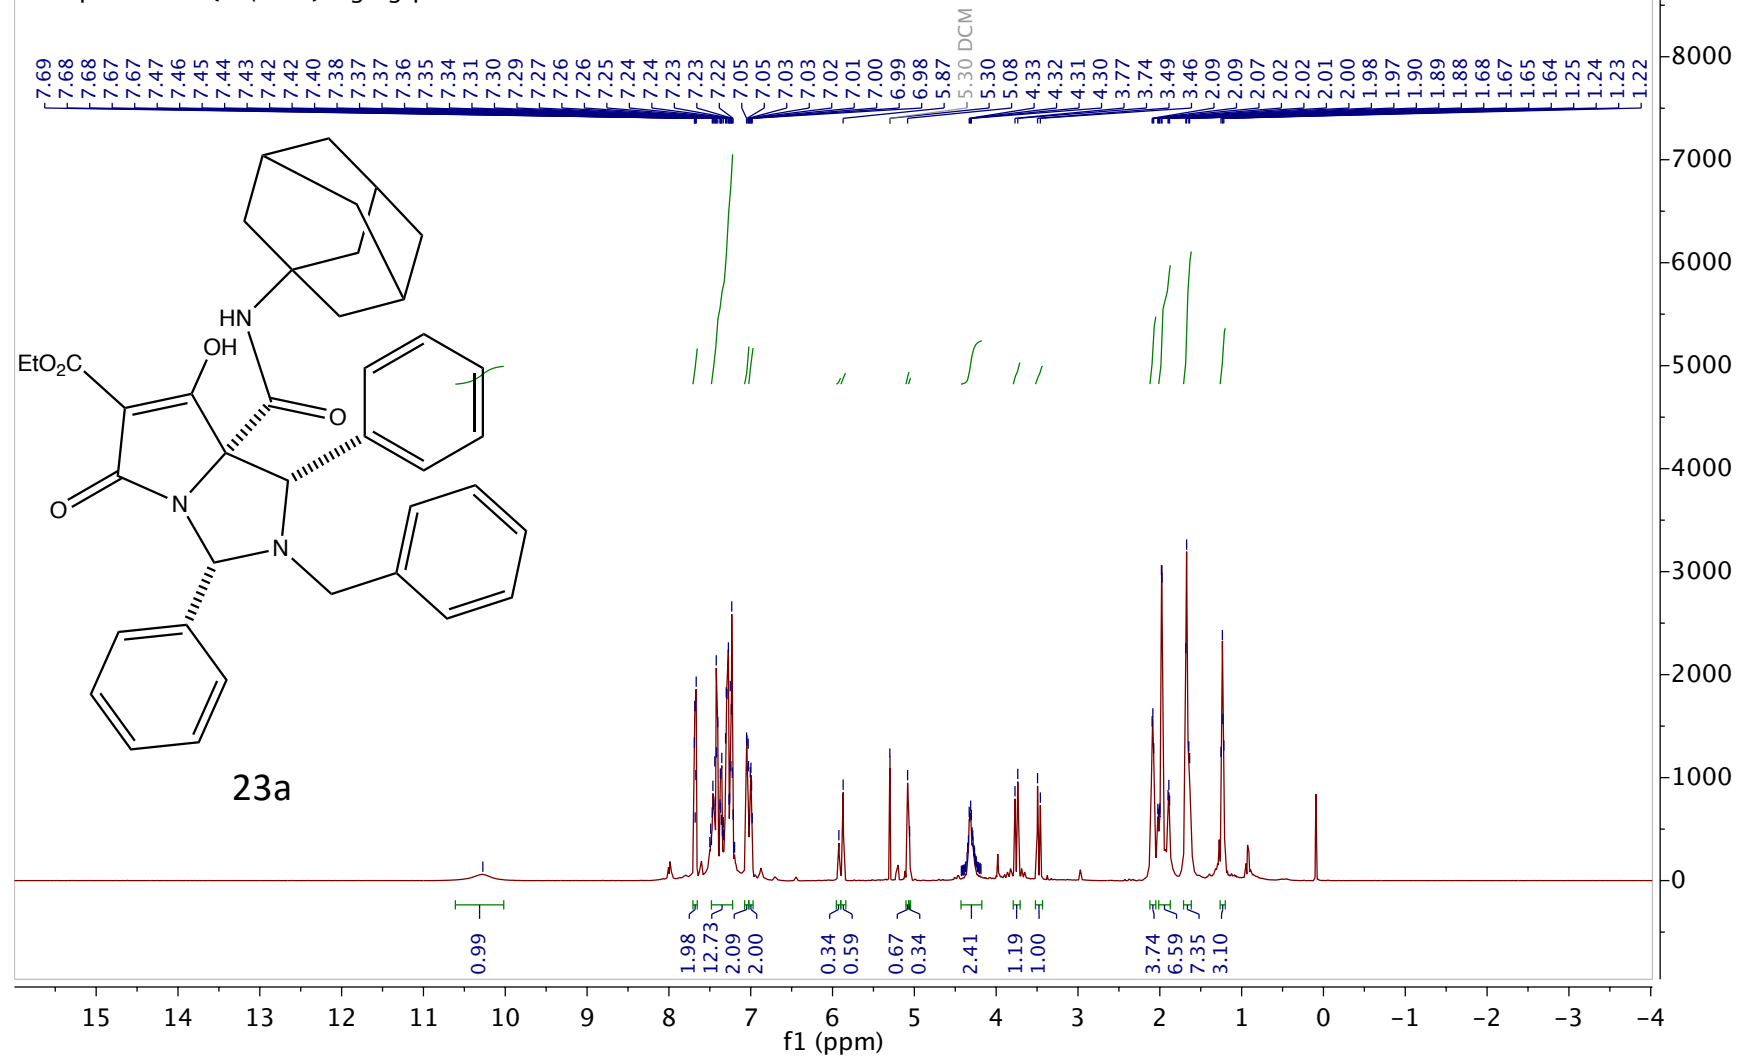

Mar24-2019-60-LS345(P) B5-B12.6.fid  
Instrument AVF400  
Chemist Liban Saney  
Group MGM  
Project Account Code DM7300  
c13acq\_512.crl CDCl3 {C:\NMR} mgmgrp 60

<sup>13</sup>C NMR (101 MHz CDCl<sub>3</sub>)

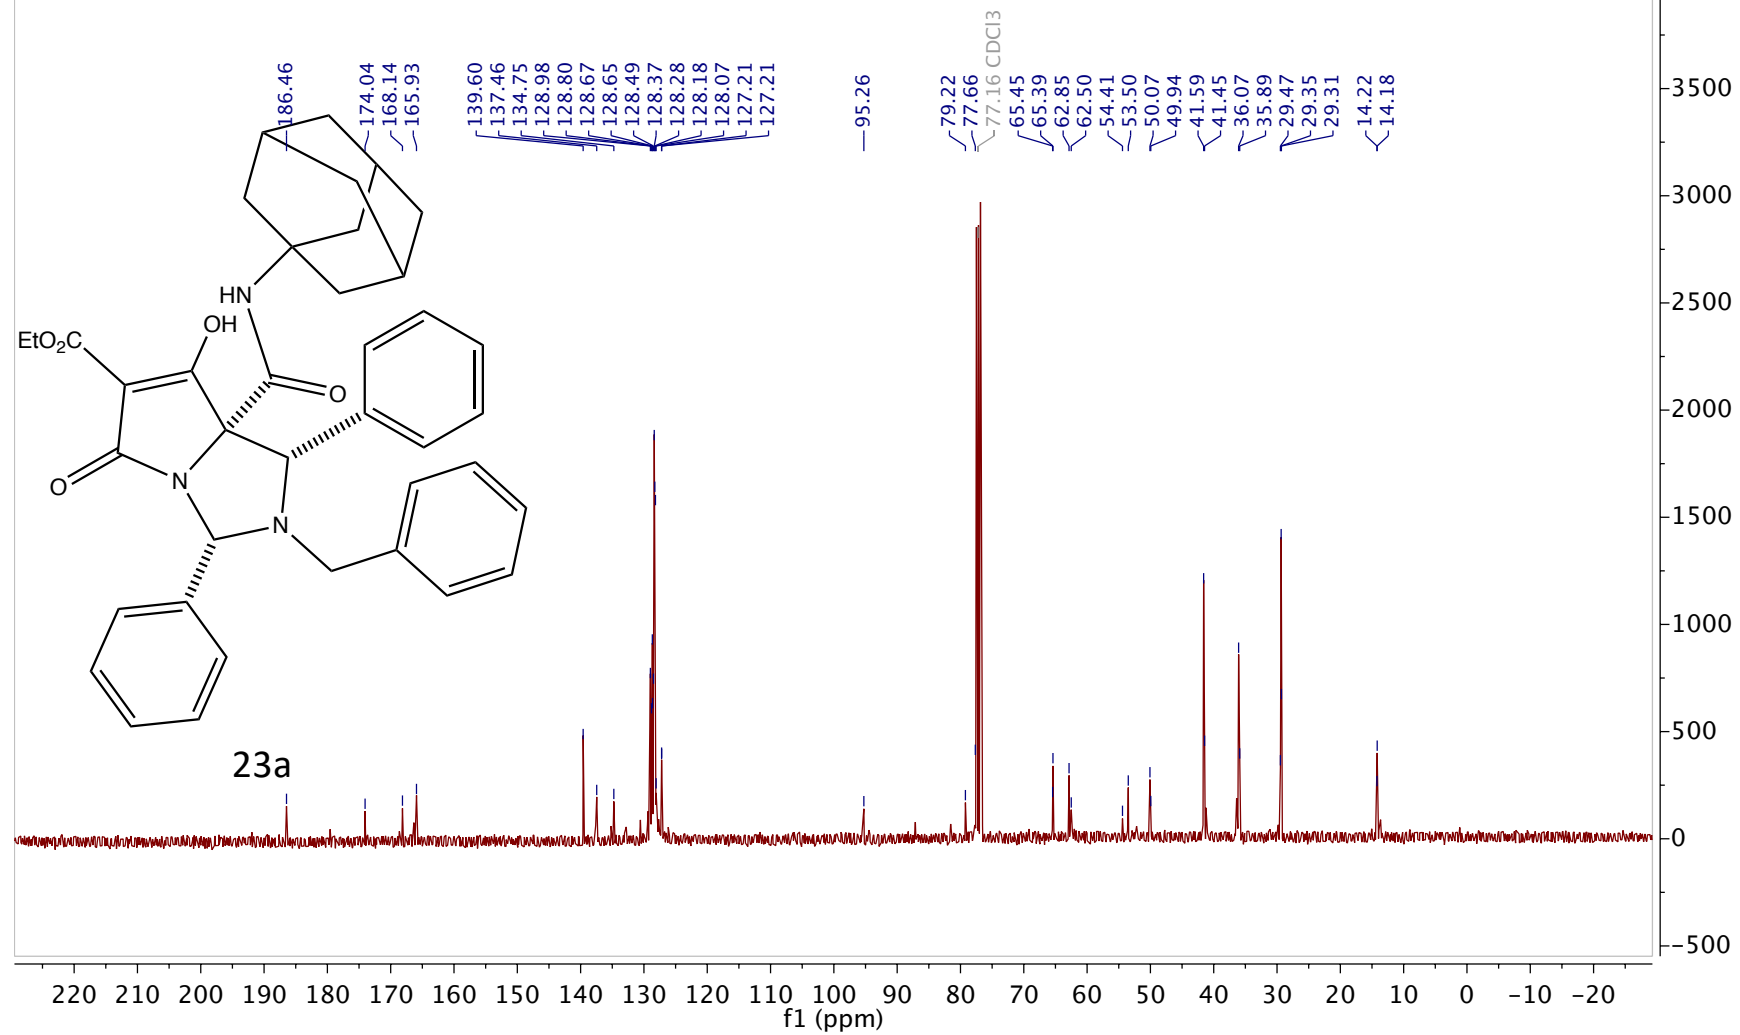

Oct06-2019-60-LS557(P) C4-F5.1.fid  
Instrument AVF400  
Chemist Liban Saney  
Group MGM  
Project Account Code DM7300  
h1acq.crl CDCl3 {C:\NMR} mgmgrp 60

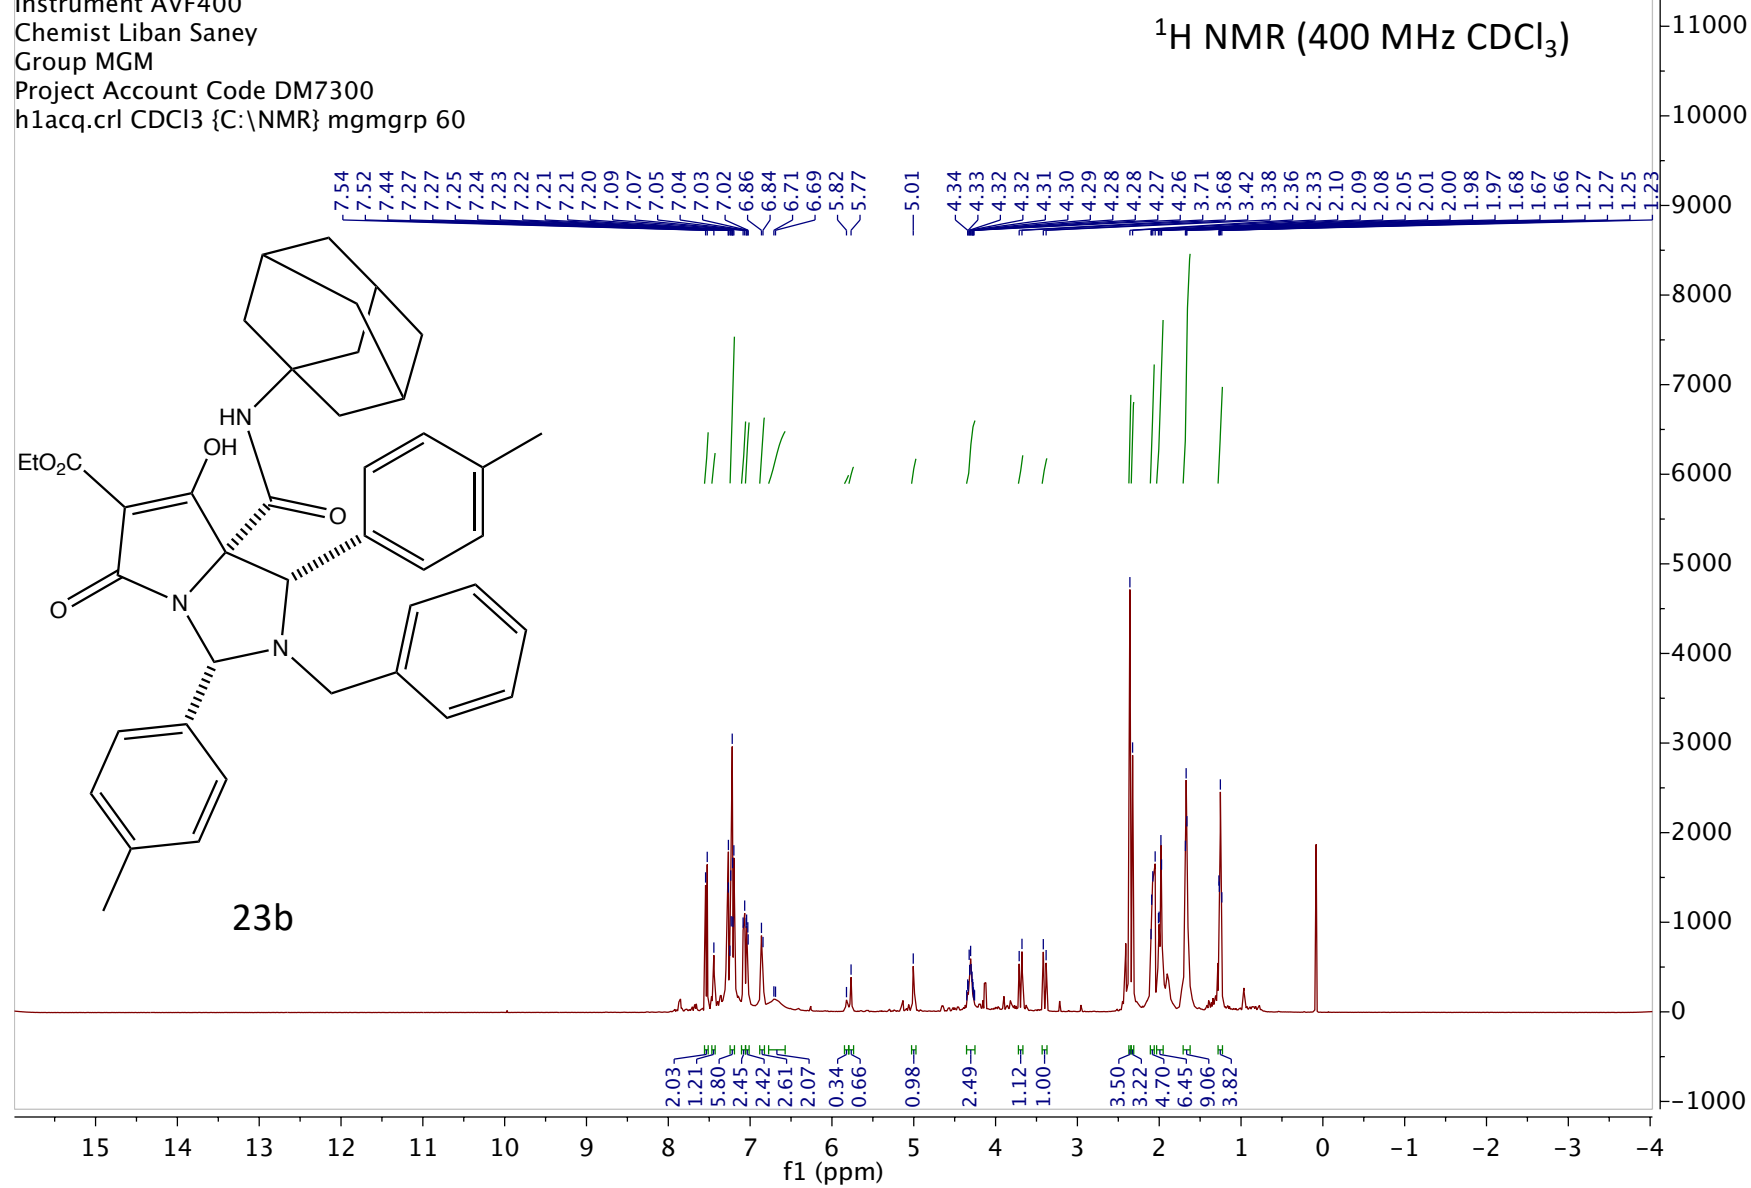

Oct06-2019-60-LS557(P) C4-F5.4.fid  
Instrument AVF400  
Chemist Liban Saney  
Group MGM  
Project Account Code DM7300  
c13acq\_512.crl CDCl3 {C:\NMR} mgmgrp 60

<sup>13</sup>C NMR (101 MHz CDCl<sub>3</sub>)

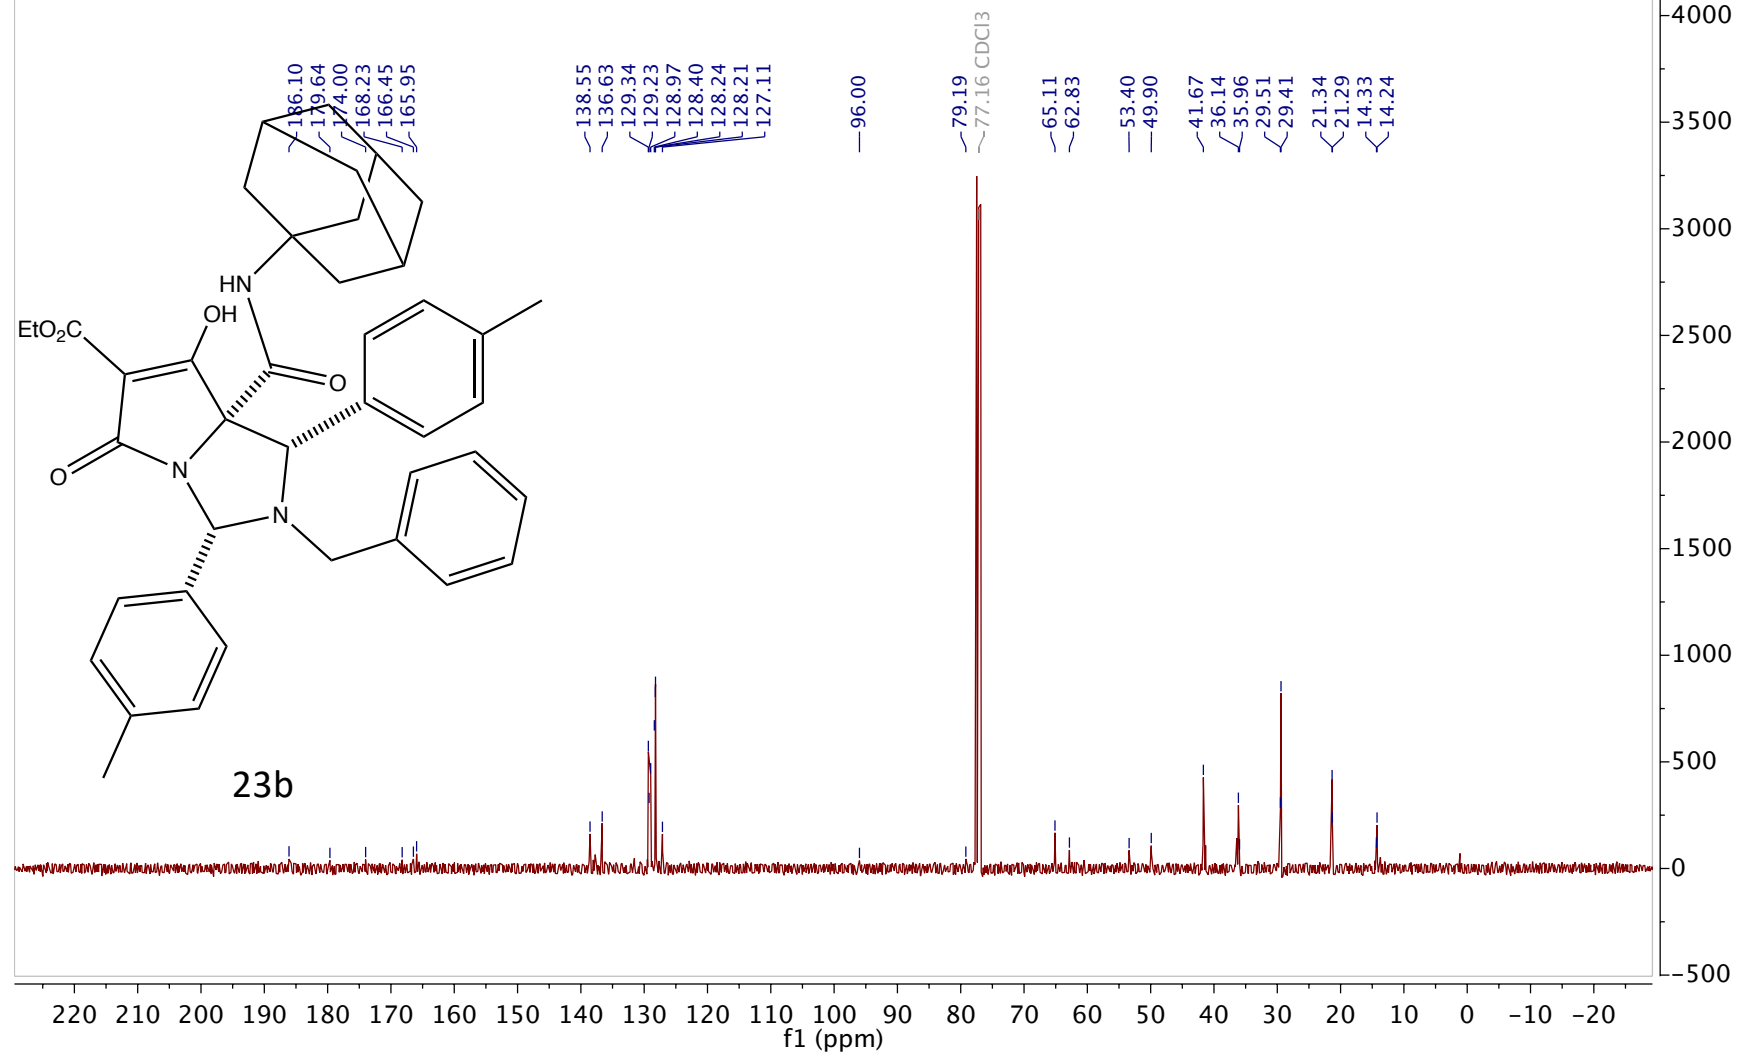

Oct05-2019-60-LS556(P) B1-B8.1.fid  
Instrument AVF400  
Chemist Liban Saney  
Group MGM  
Project Account Code DM7300  
h1acq.crl CDCl3 {C:\NMR} mgmgrp 60

<sup>1</sup>H NMR (400 MHz CDCl<sub>3</sub>)

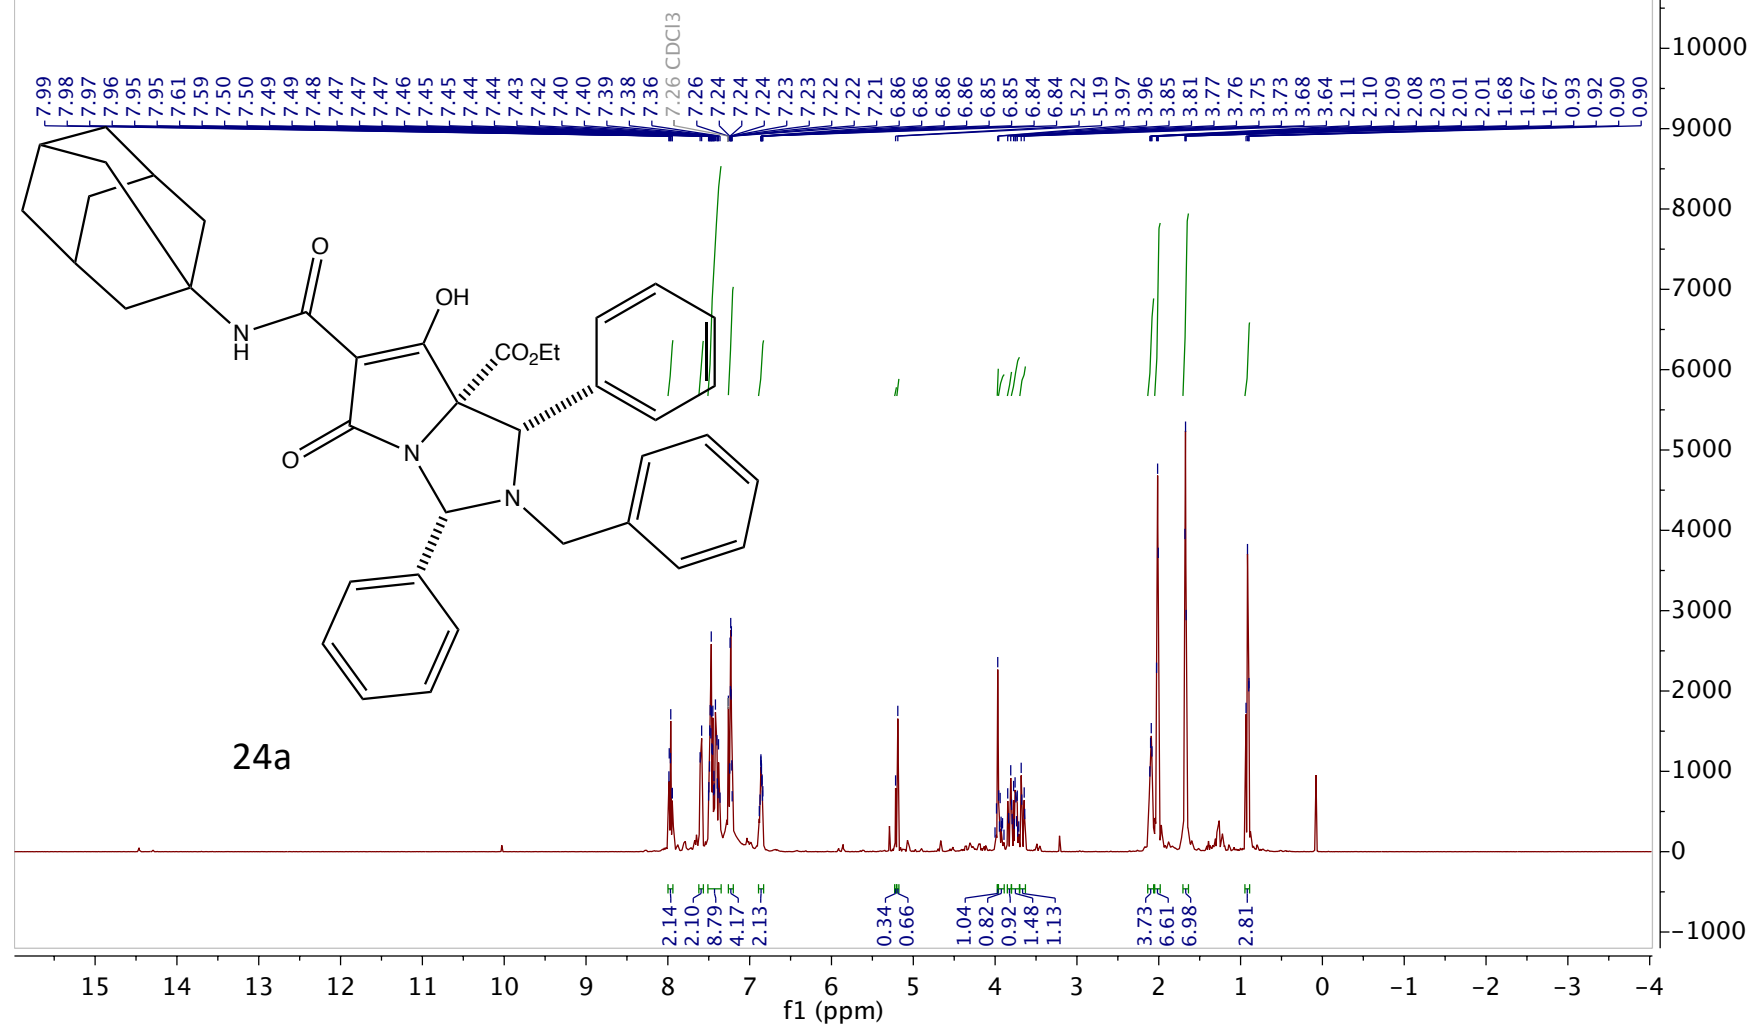

Oct05-2019-60-LS556(P) B1-B8.4.fid  
Instrument AVF400  
Chemist Liban Saney  
Group MGM  
Project Account Code DM7300  
c13acq\_512.crl CDCl3 {C:\NMR} mgmgrp 60

$^{13}\text{C}$  NMR (101 MHz  $\text{CDCl}_3$ )

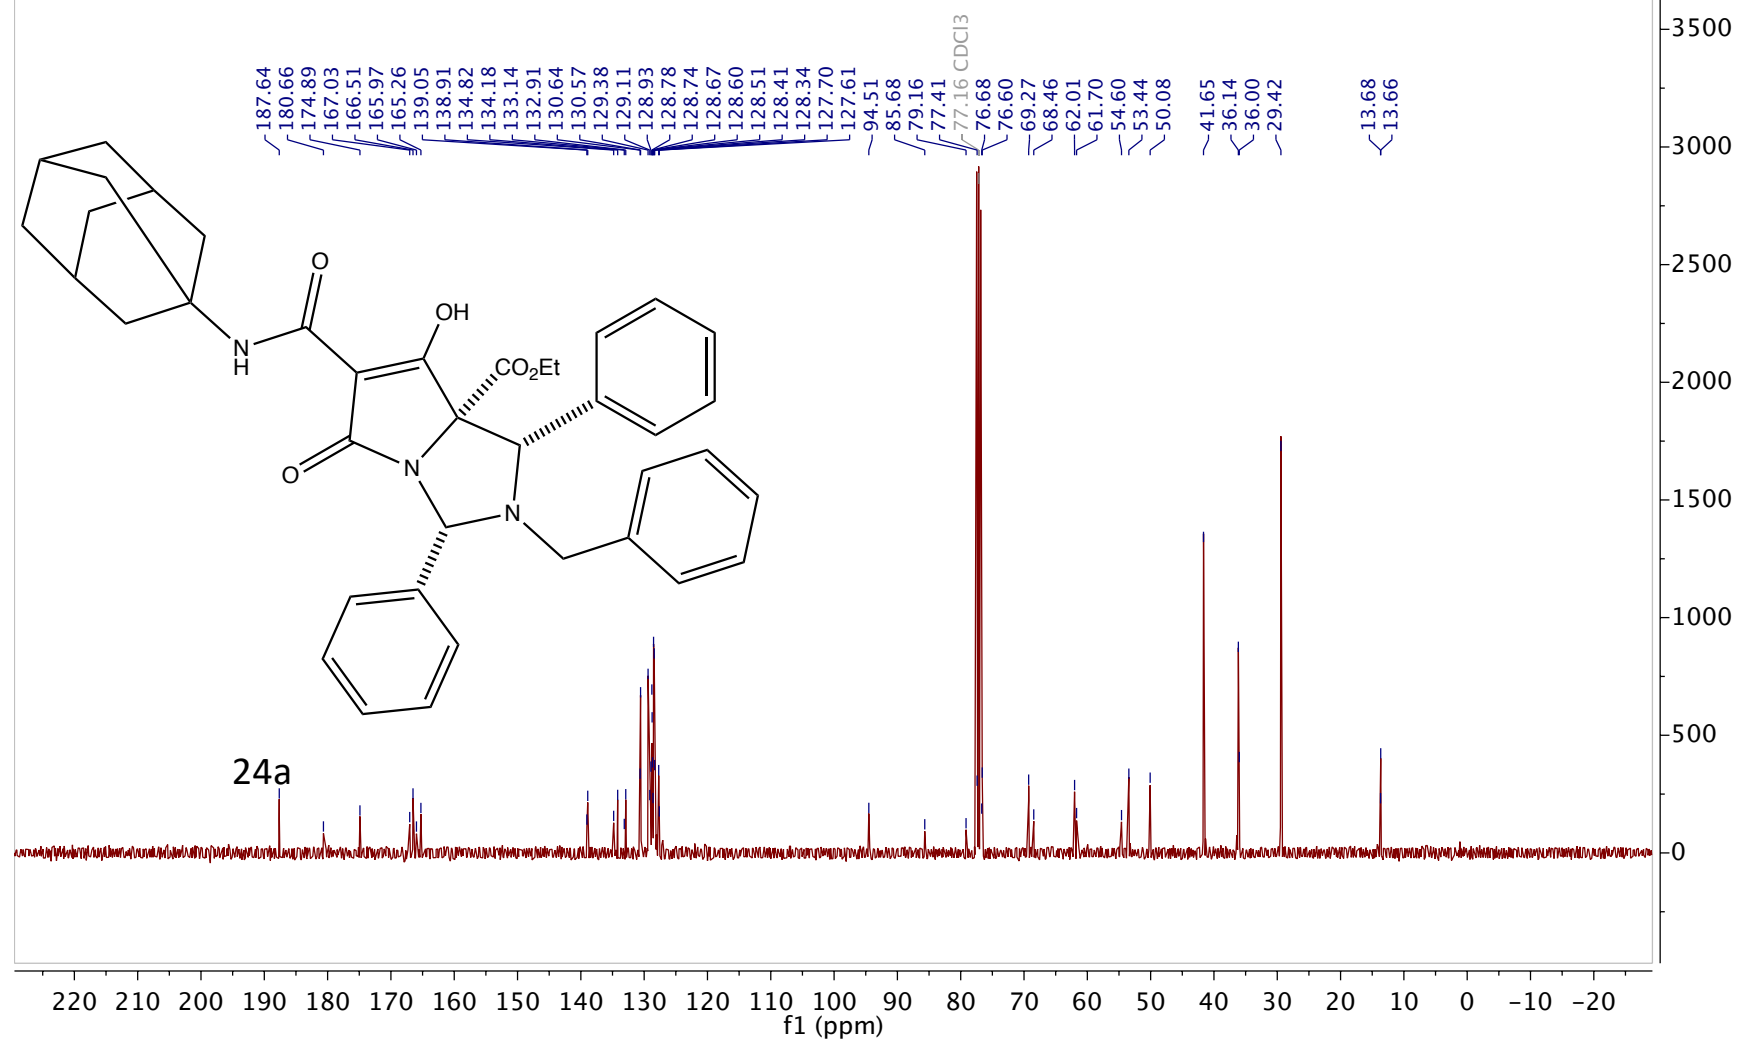

Oct02-2019-56-LS553(P) A2-D1.1.fid  
Instrument AVF400  
Chemist Liban Saney  
Group MGM  
Project Account Code DM7300  
h1acq.crl CDCl3 {C:\NMR} mgmgrp 56

<sup>1</sup>H NMR (400 MHz CDCl<sub>3</sub>)

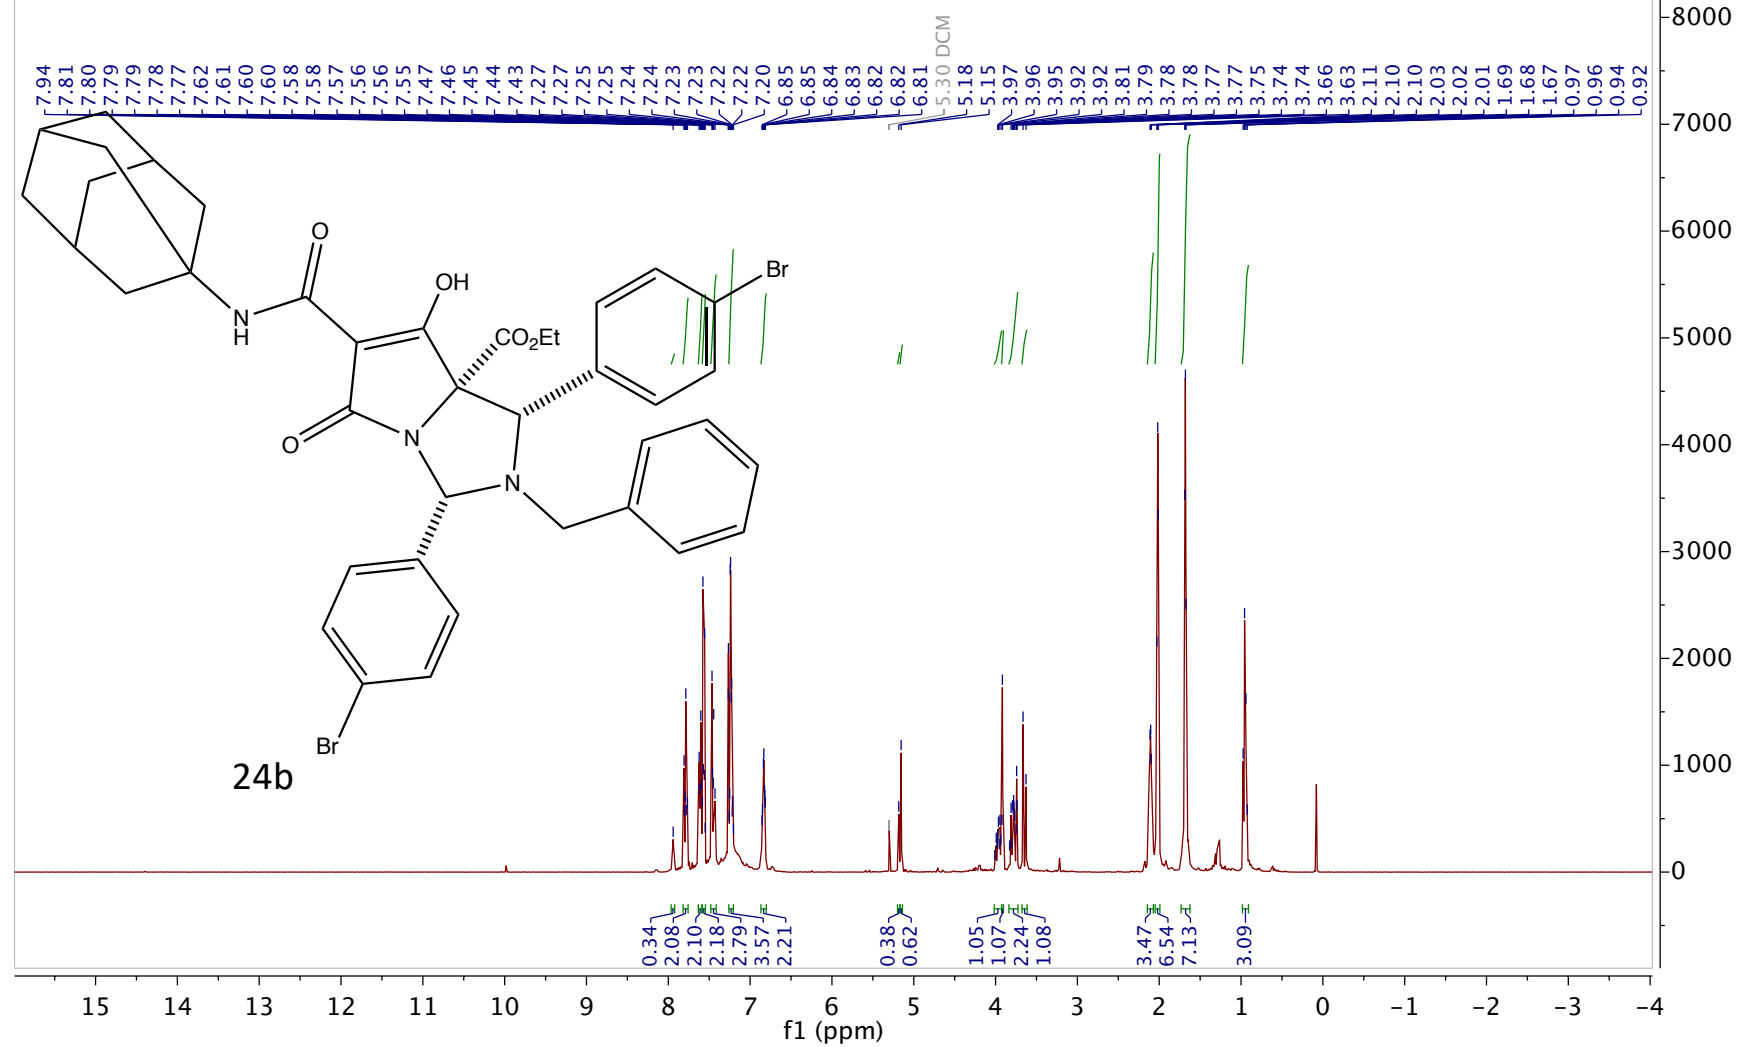

Oct02-2019-56-LS553(P) A2-D1.4.fid  
Instrument AVF400  
Chemist Liban Saney  
Group MGM  
Project Account Code DM7300  
c13acq\_512.crl CDCl3 {C:\NMR} mgmgrp 56

$^{13}\text{C}$  NMR (101 MHz  $\text{CDCl}_3$ )

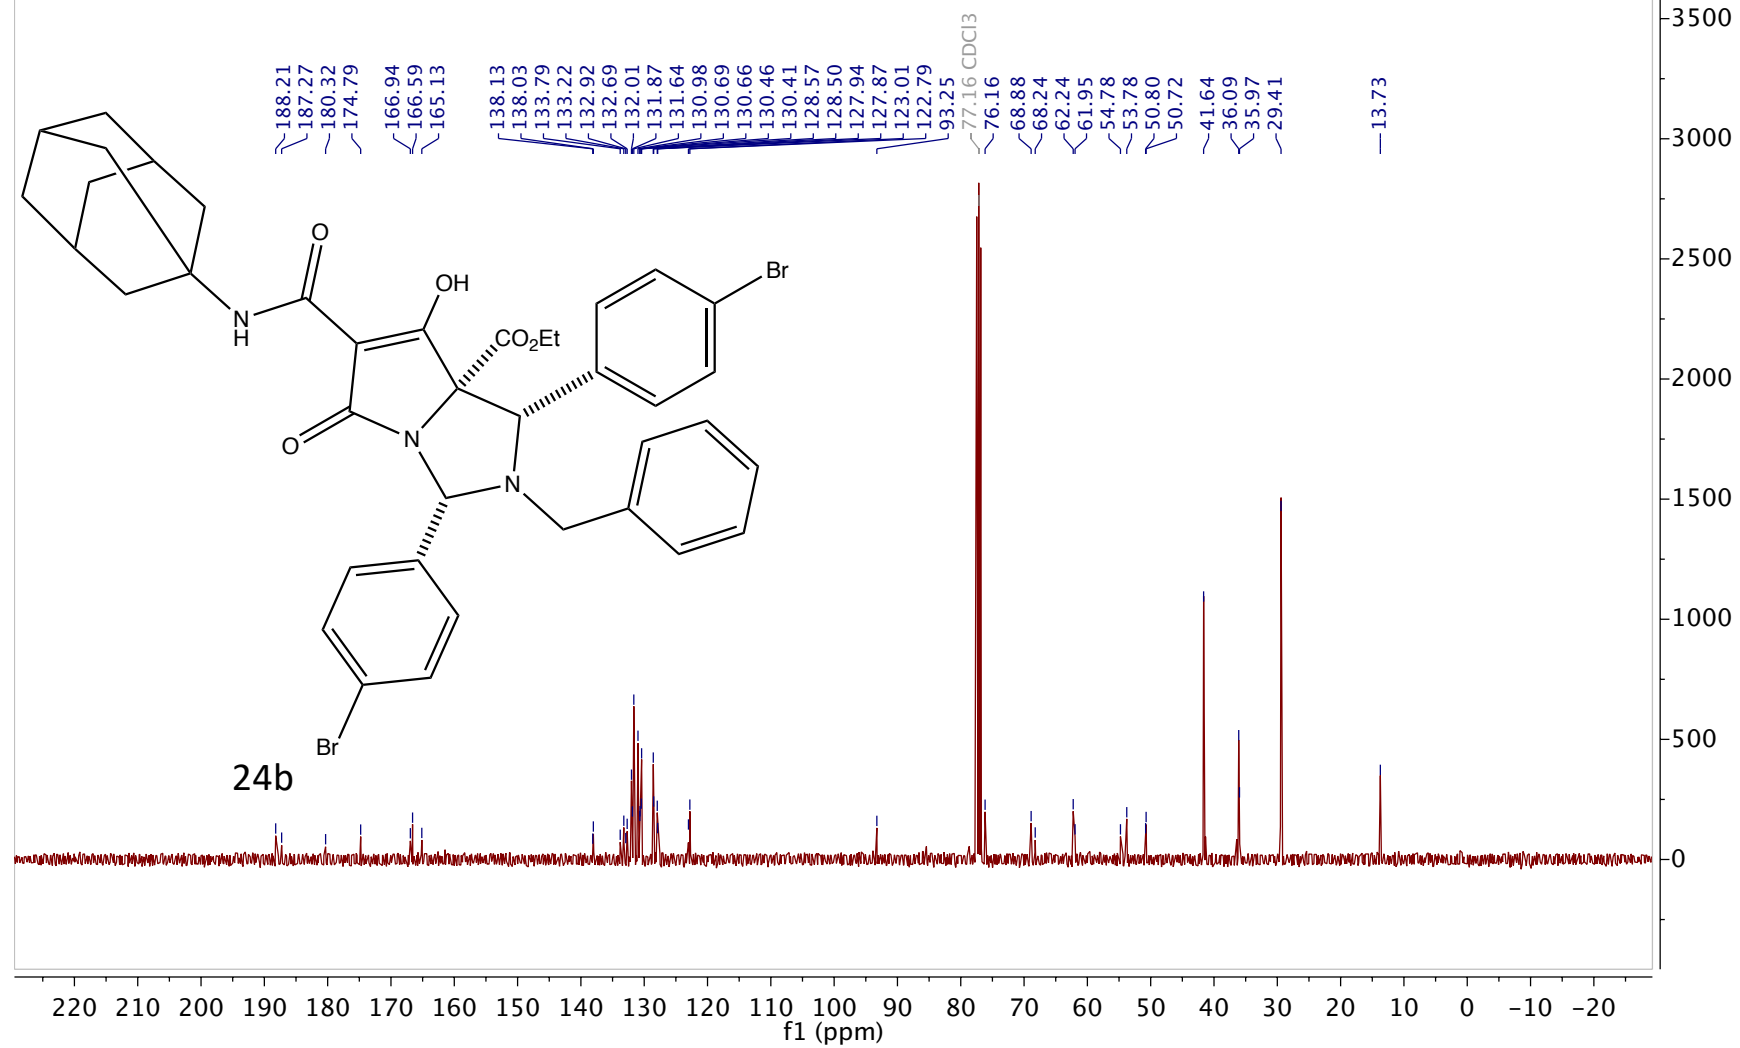



Sep30-2019-60-LS551(P) B4-B12.1.fid  
Instrument AVF400  
Chemist Liban Saney  
Group MGM  
Project Account Code DM7300  
h1acq.crl CDCl3 {C:\NMR} mgmgrp 60

<sup>1</sup>H NMR (400 MHz CDCl<sub>3</sub>)

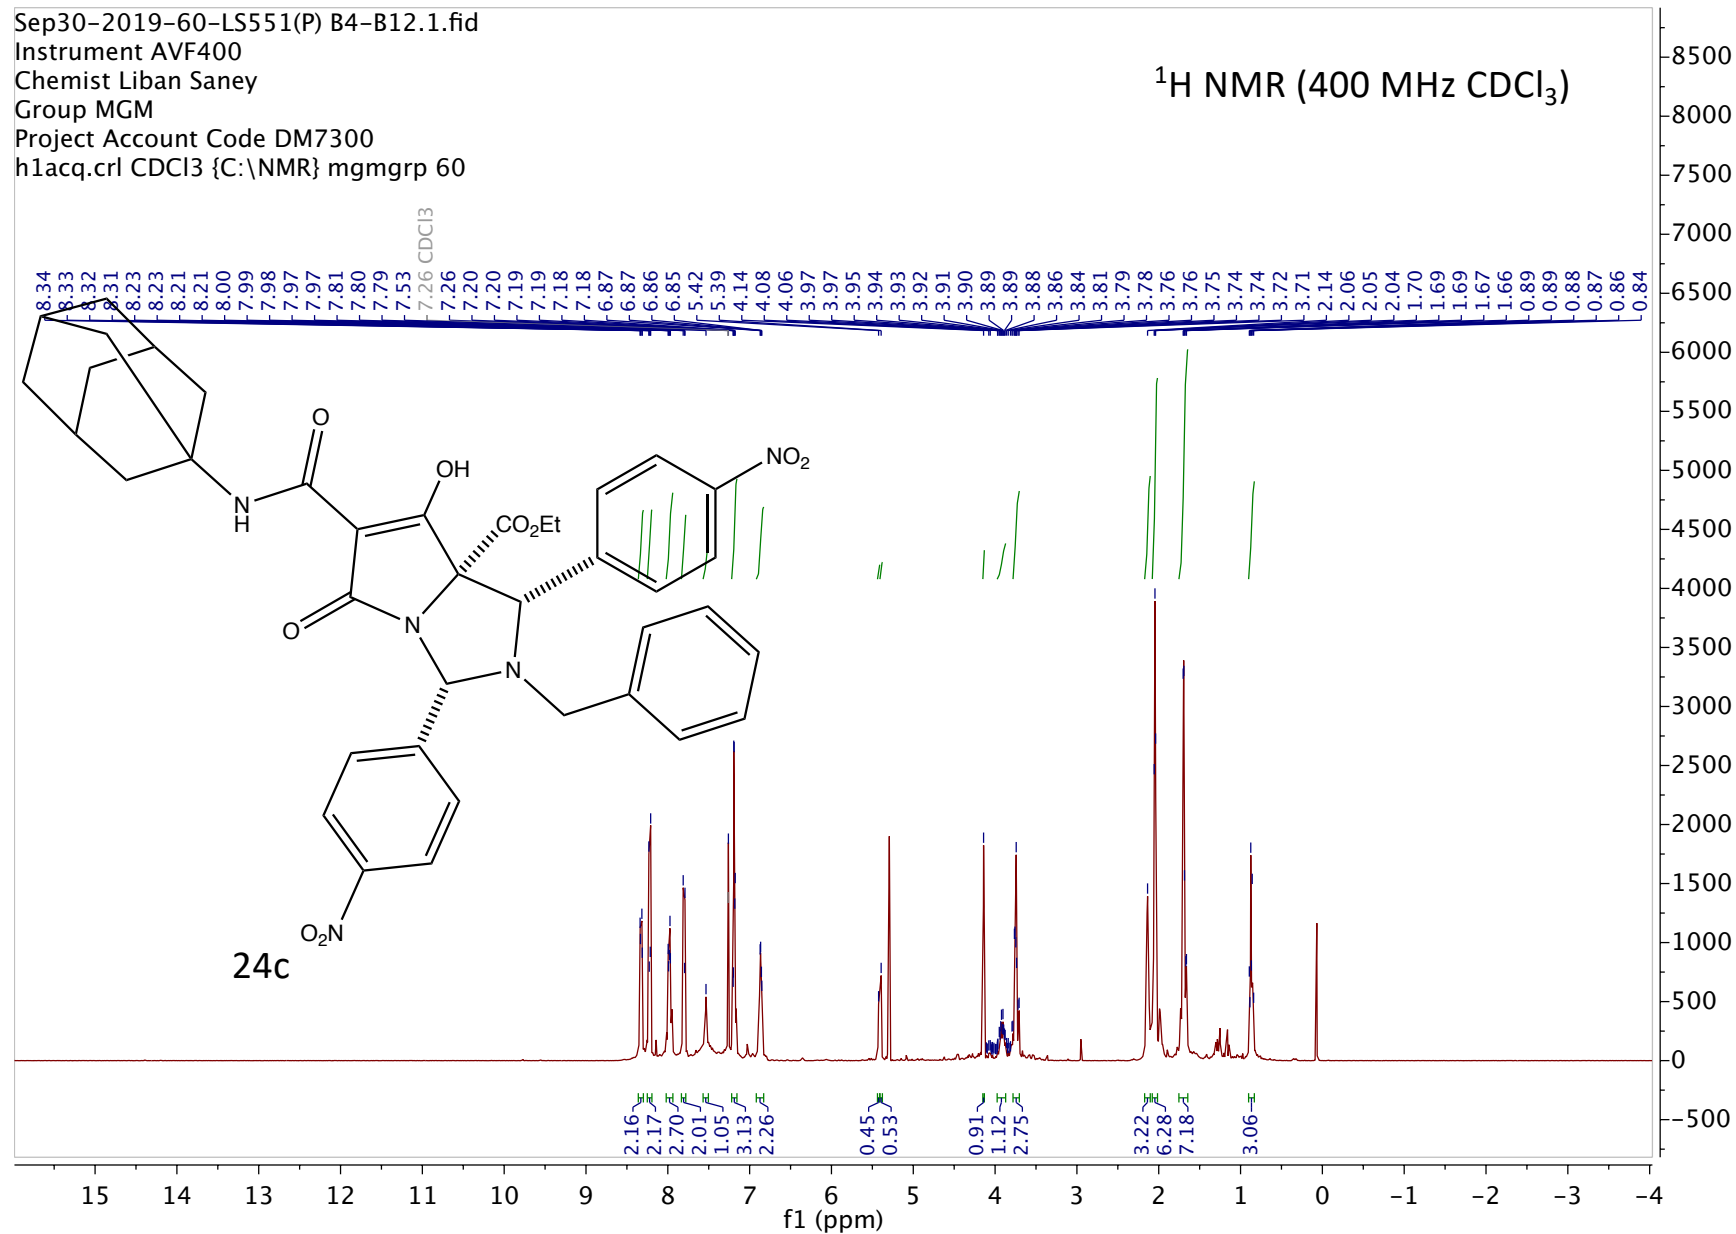

Sep30-2019-60-LS551(P) B4-B12.4.fid  
Instrument AVF400  
Chemist Liban Saney  
Group MGM  
Project Account Code DM7300  
c13acq\_512.crl CDCl3 {C:\NMR} mgmgrp 60

<sup>13</sup>C NMR (101 MHz CDCl<sub>3</sub>)

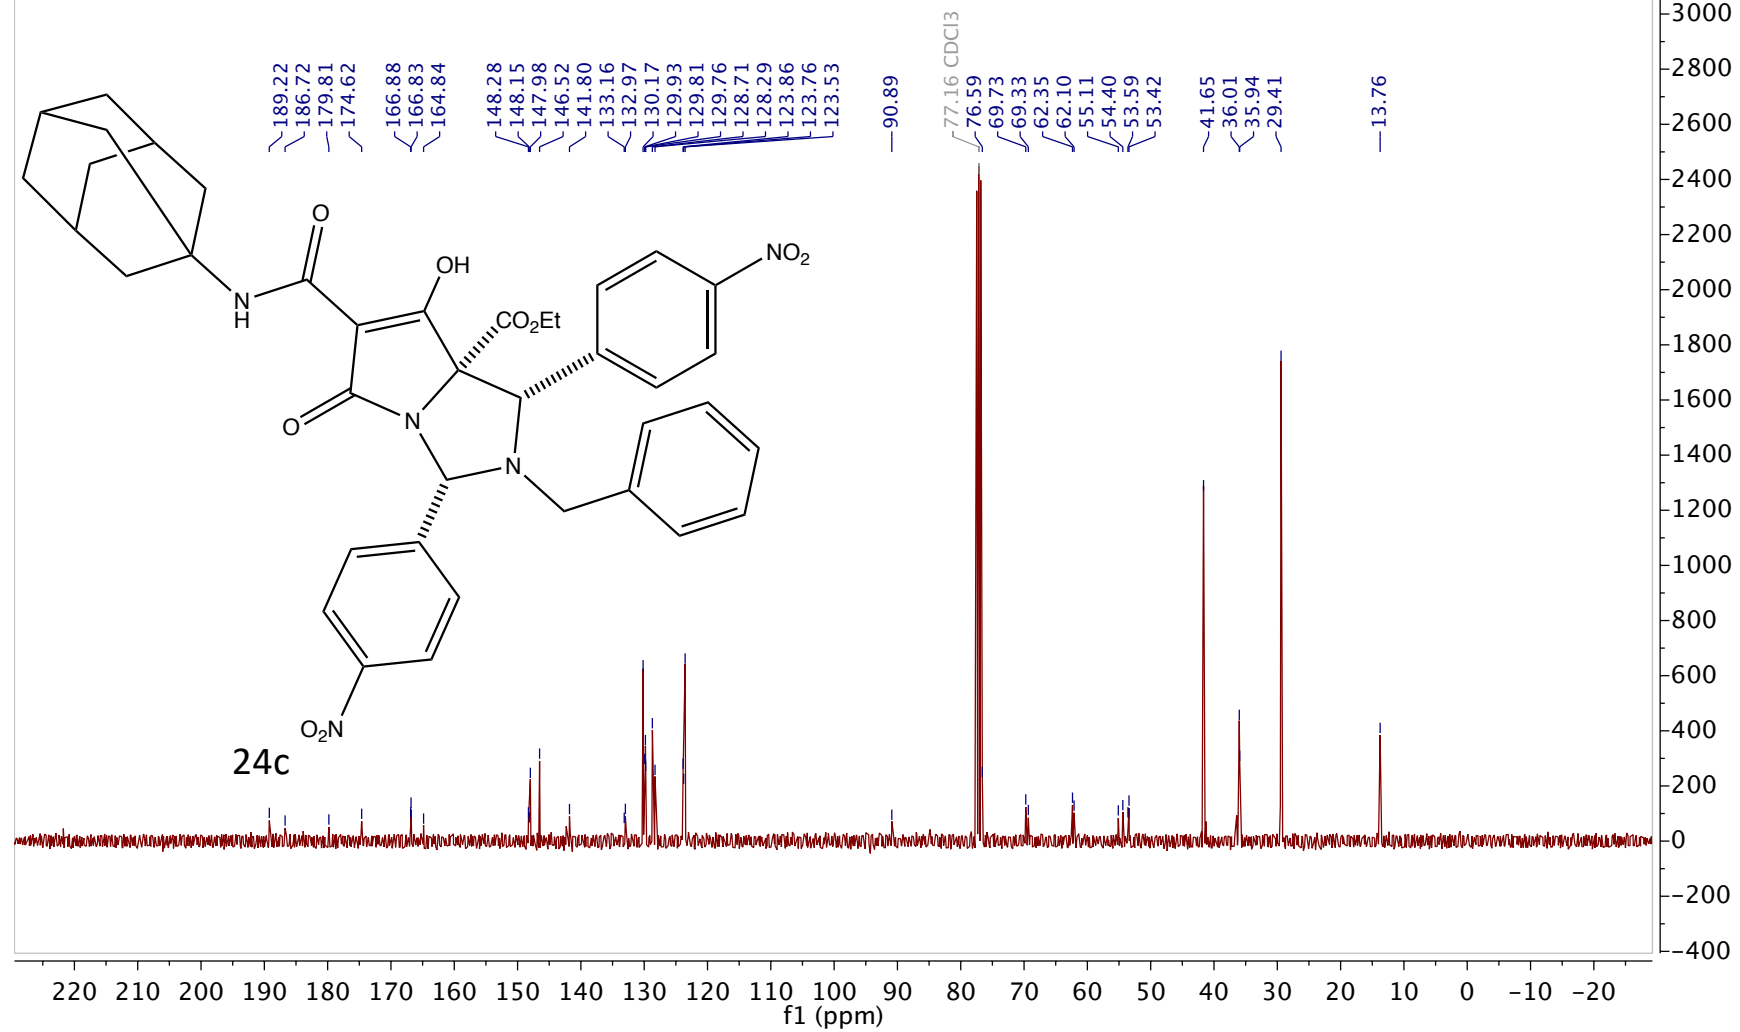

Jan23-2021-28-LS922(P) B3-C12.1.fid  
Instrument AVH400  
Group MGM  
Chemist Liban Saney  
Project Account Code DM7300  
h1acq.crl CDCl3 {C:\NMR} mgmgrp 28

<sup>1</sup>H NMR (400 MHz CDCl<sub>3</sub>)

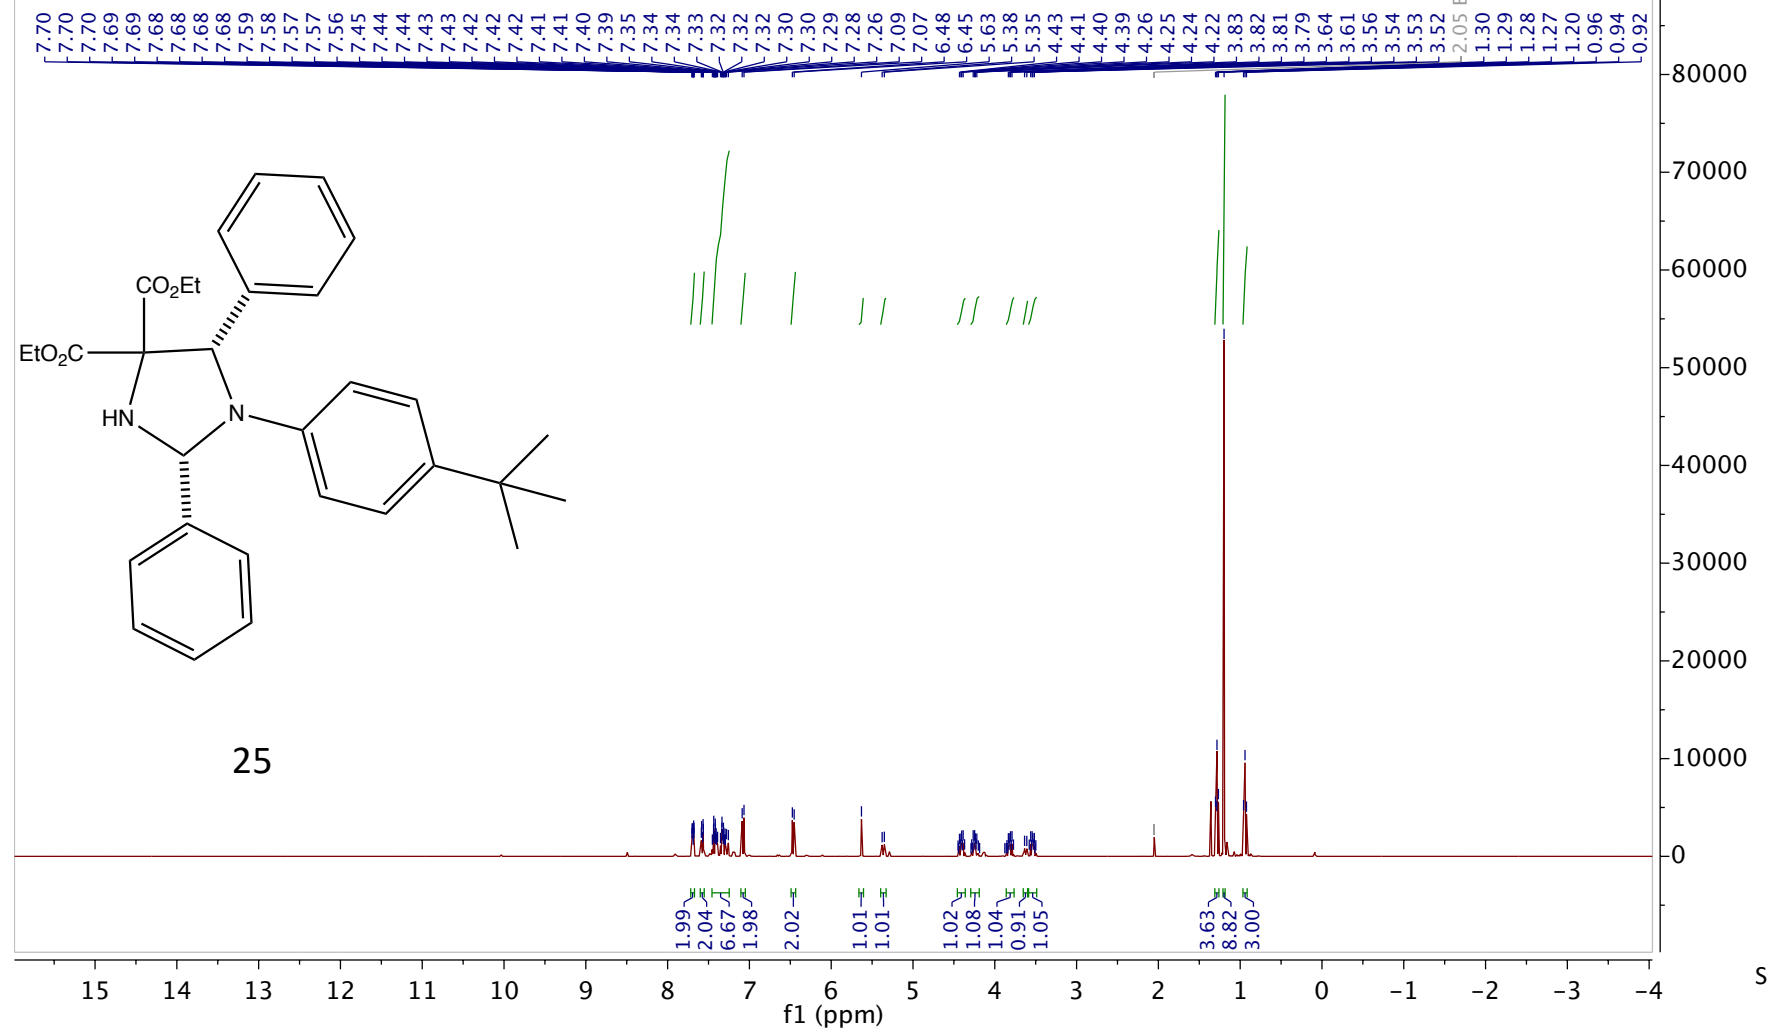

Jan23-2021-28-LS922(P) B3-C12.4.fid  
Instrument AVH400  
Group MGM  
Chemist Liban Saney  
Project Account Code DM7300  
c13acq\_512.crl CDCl3 {C:\NMR} mgmgrp 28

<sup>13</sup>C NMR (101 MHz CDCl<sub>3</sub>)

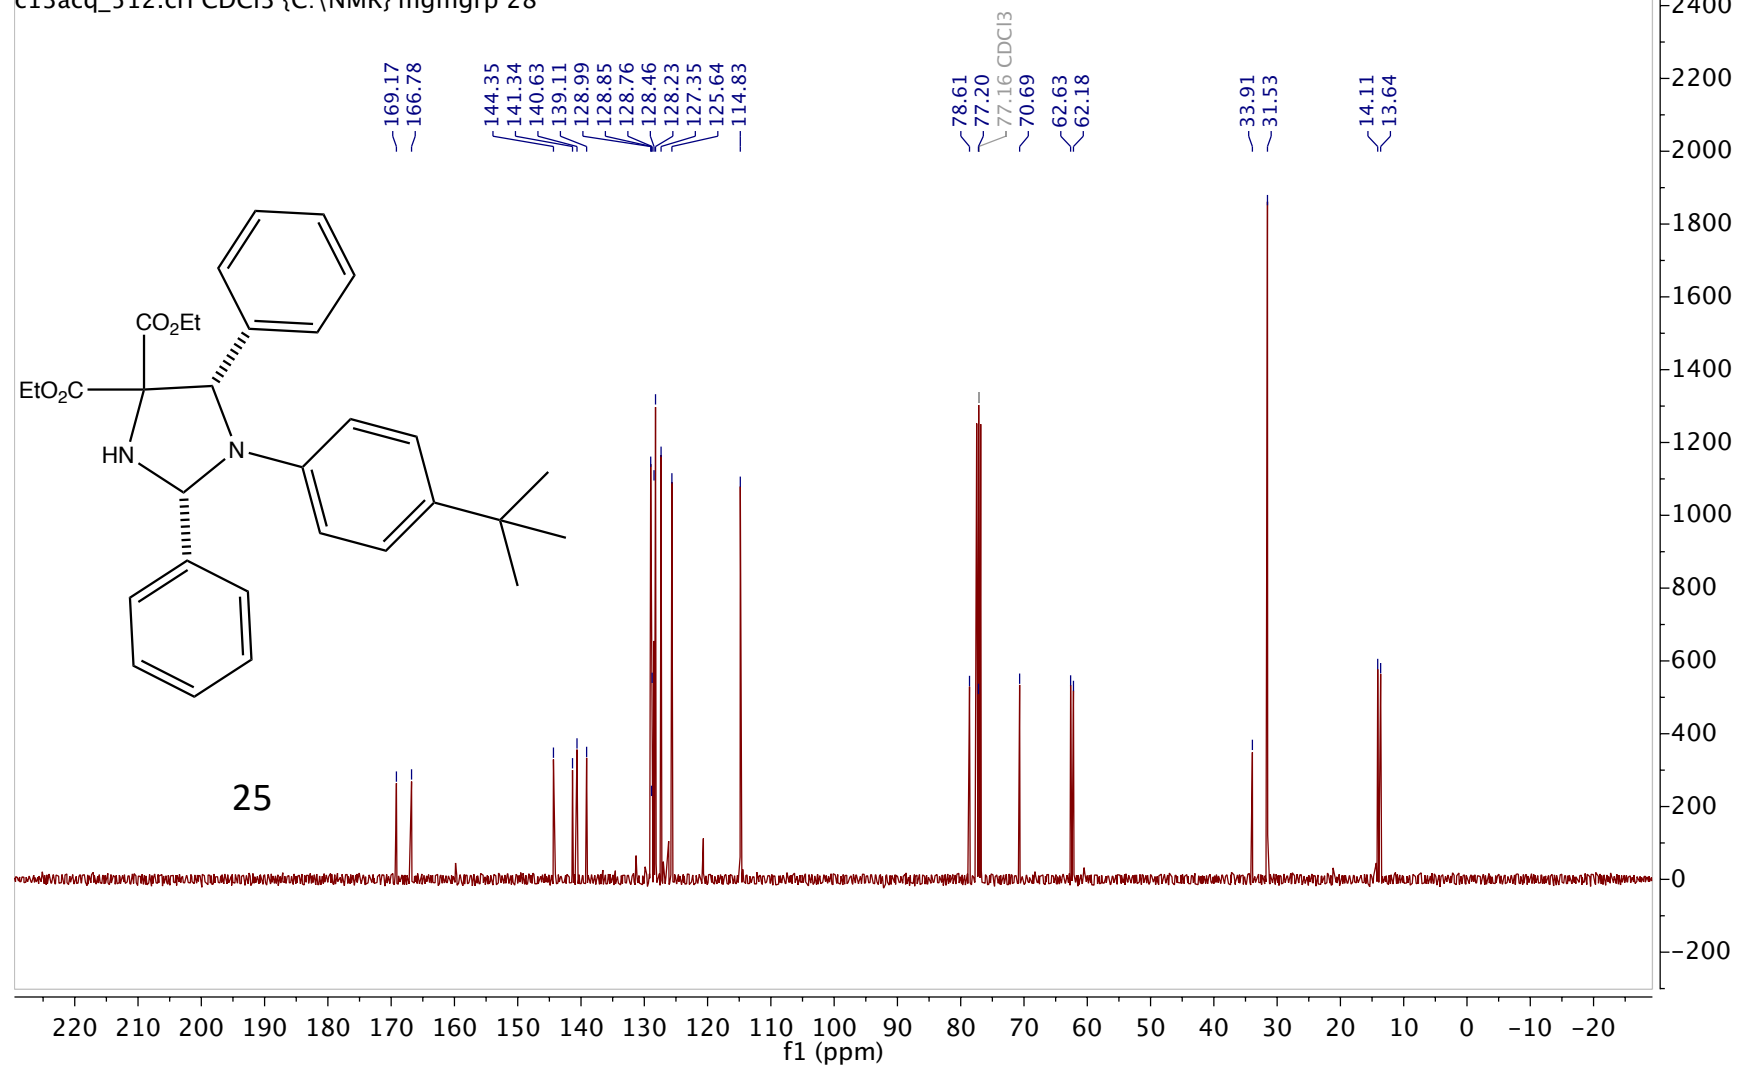

Jan28-2021-5-LS926(P) C8-F3.1.fid  
Instrument AVH400  
Group MGM  
Chemist Liban Saney  
Project Account Code DM7300  
h1acq.crl CDCl3 {C:\NMR} mgmgrp 5

<sup>1</sup>H NMR (400 MHz CDCl<sub>3</sub>)

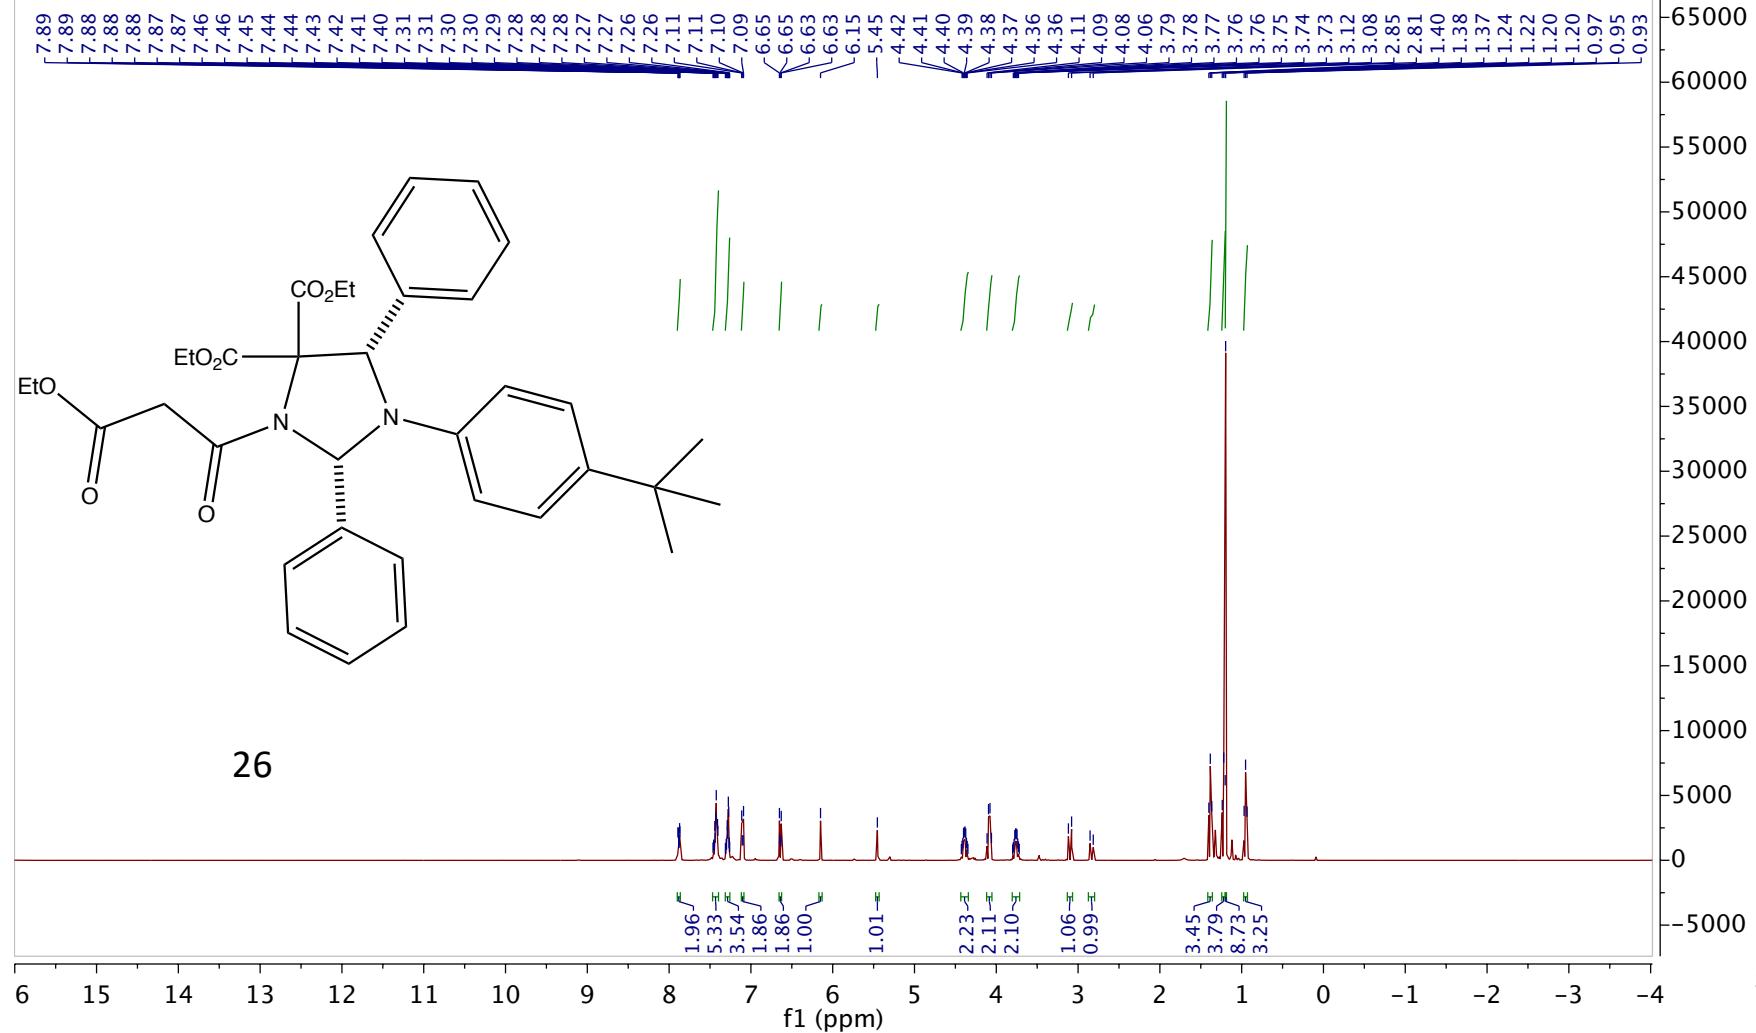

Jan28-2021-5-LS926(P) C8-F3.4.fid  
Instrument AVH400  
Group MGM  
Chemist Liban Saney  
Project Account Code DM7300  
c13acq\_512.crl CDCl3 {C:\NMR} mgmgrp 5

$^{13}\text{C}$  NMR (101 MHz  $\text{CDCl}_3$ )

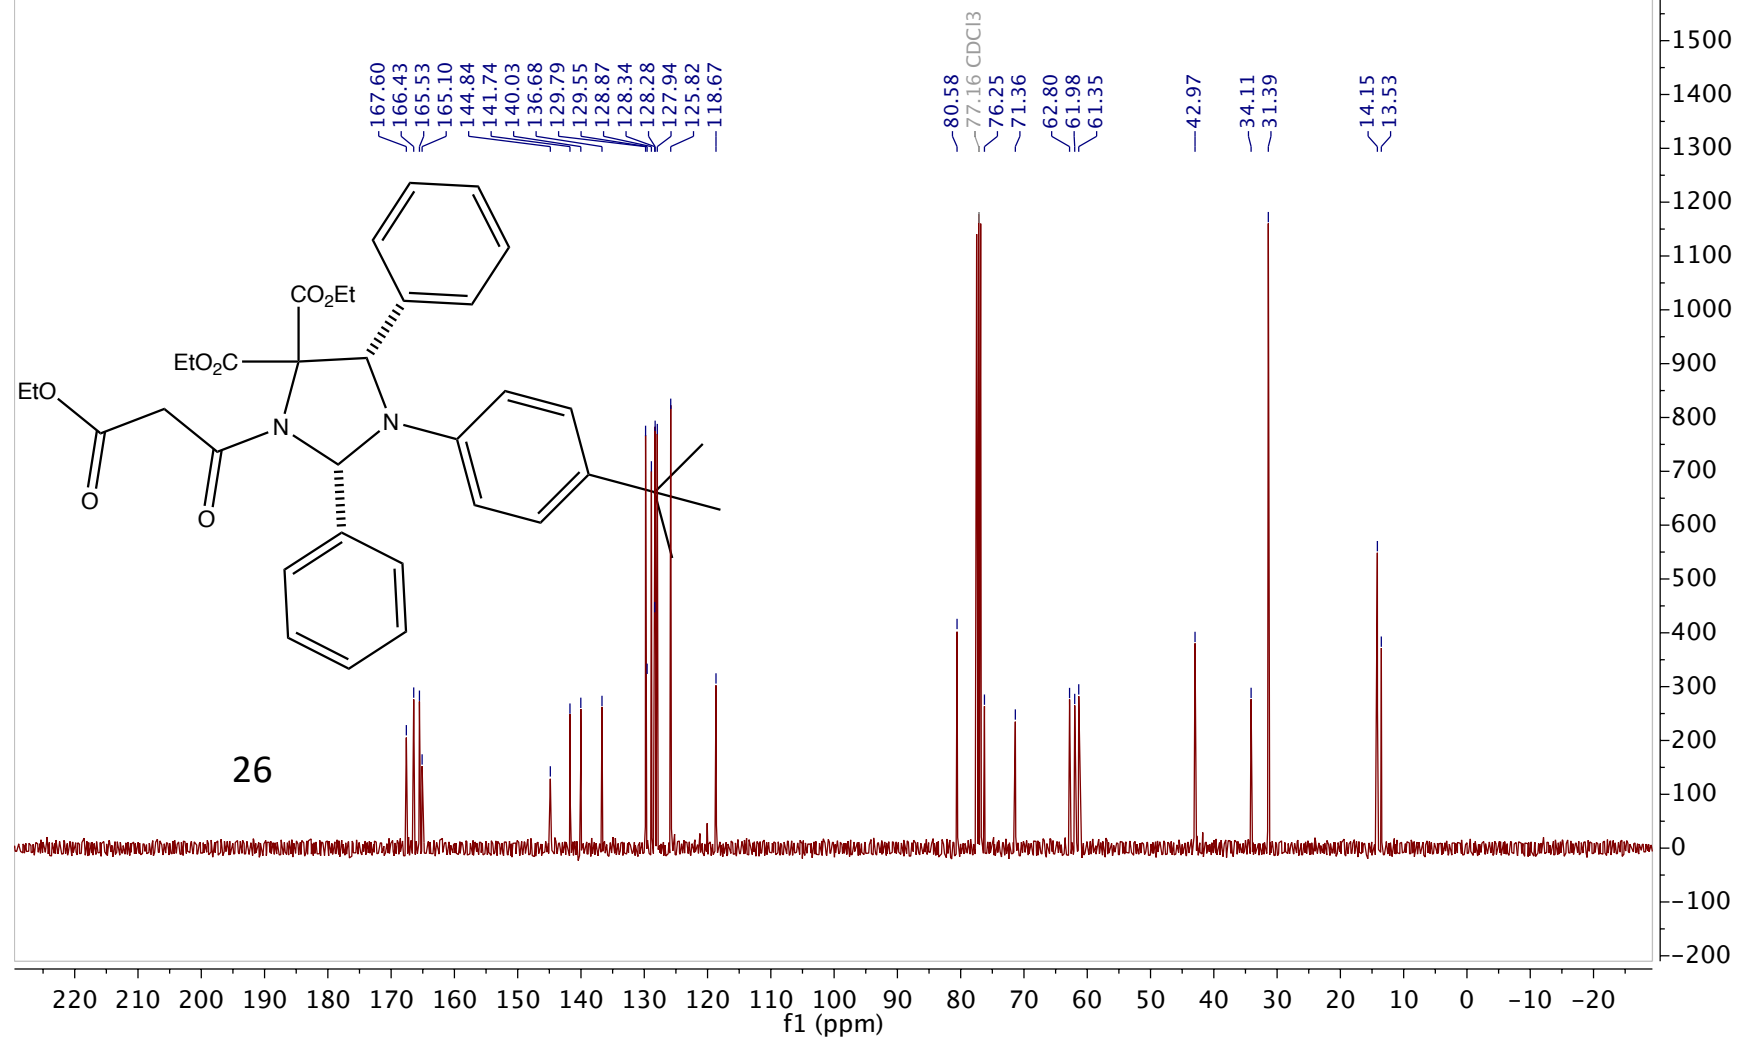

Feb03-2021-52-LS939(C).1.fid

Instrument AVH400

Group MGM

Chemist Liban Saney

Project Account Code DM7300

h1acq.crl CDCl3 {C:\NMR} mgmgrp 52

<sup>1</sup>H NMR (400 MHz, CDCl<sub>3</sub>)

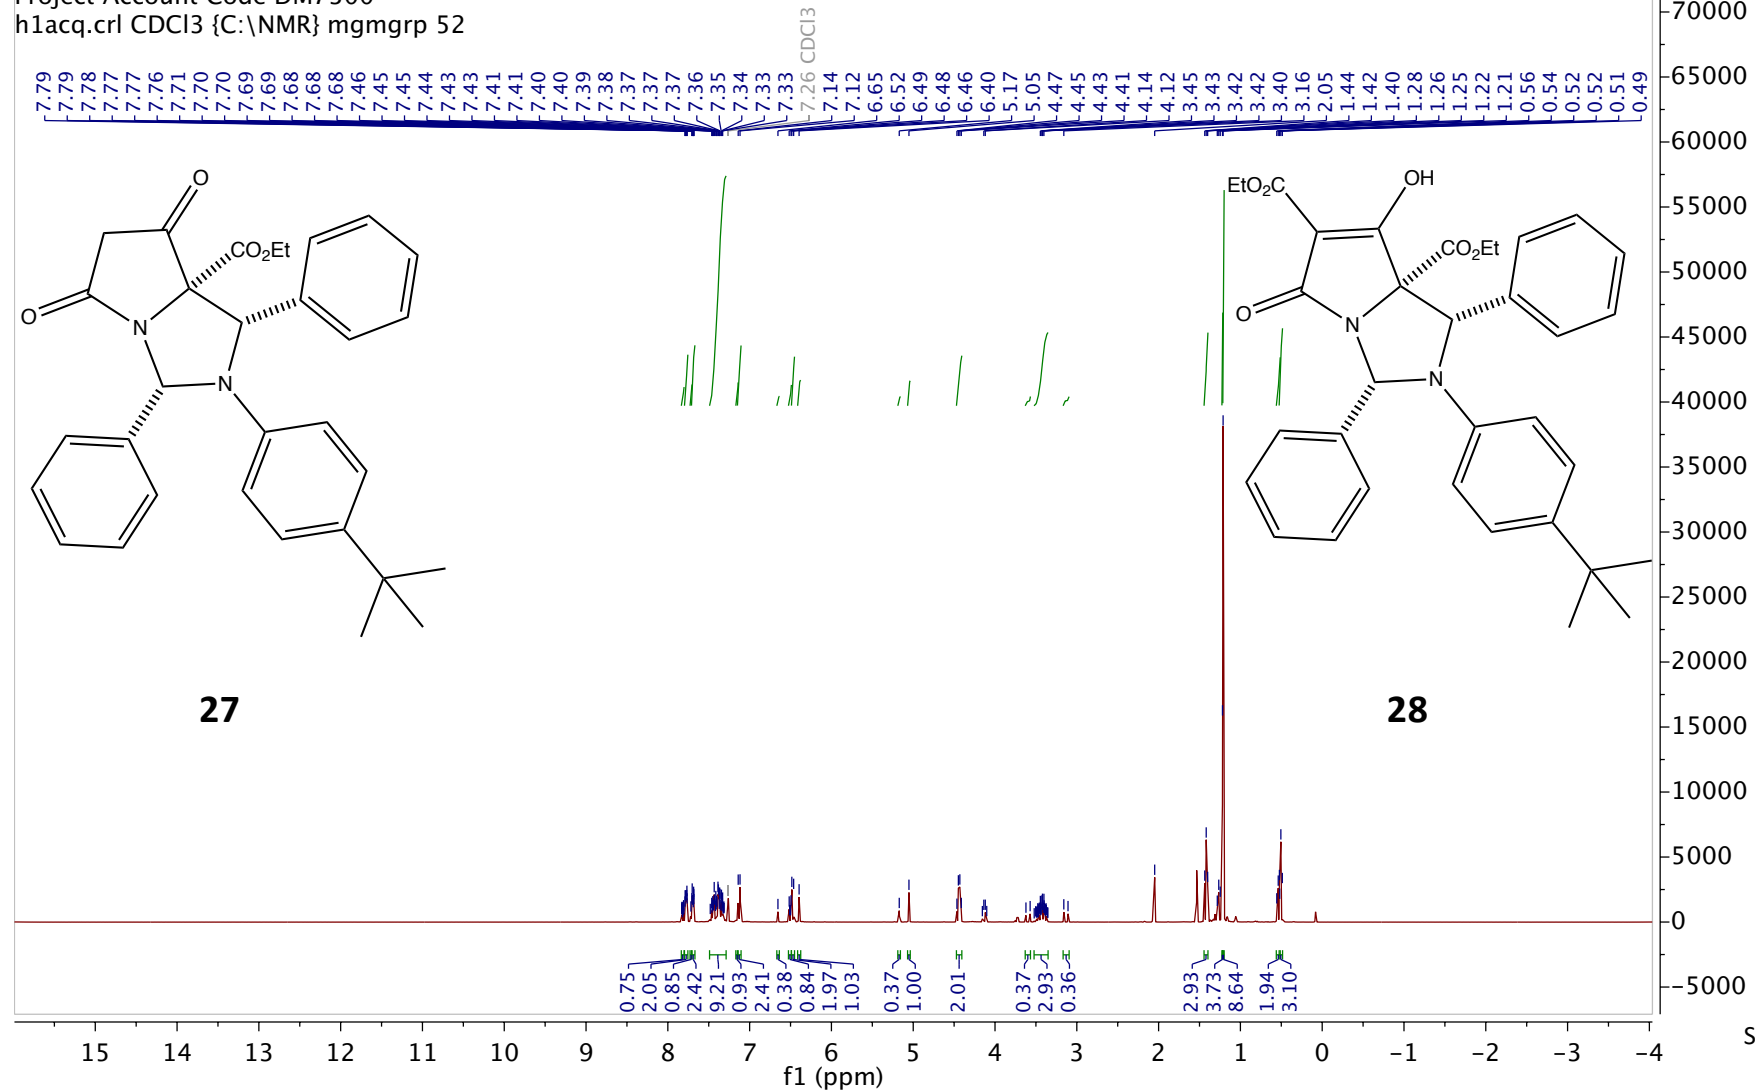

Feb03-2021-52-LS939(C).4.fid

Instrument AVH400

Group MGM

Chemist Liban Saney

Project Account Code DM7300

c13acq\_512.crl CDCl3 {C:\NMR} mgmgrp 52

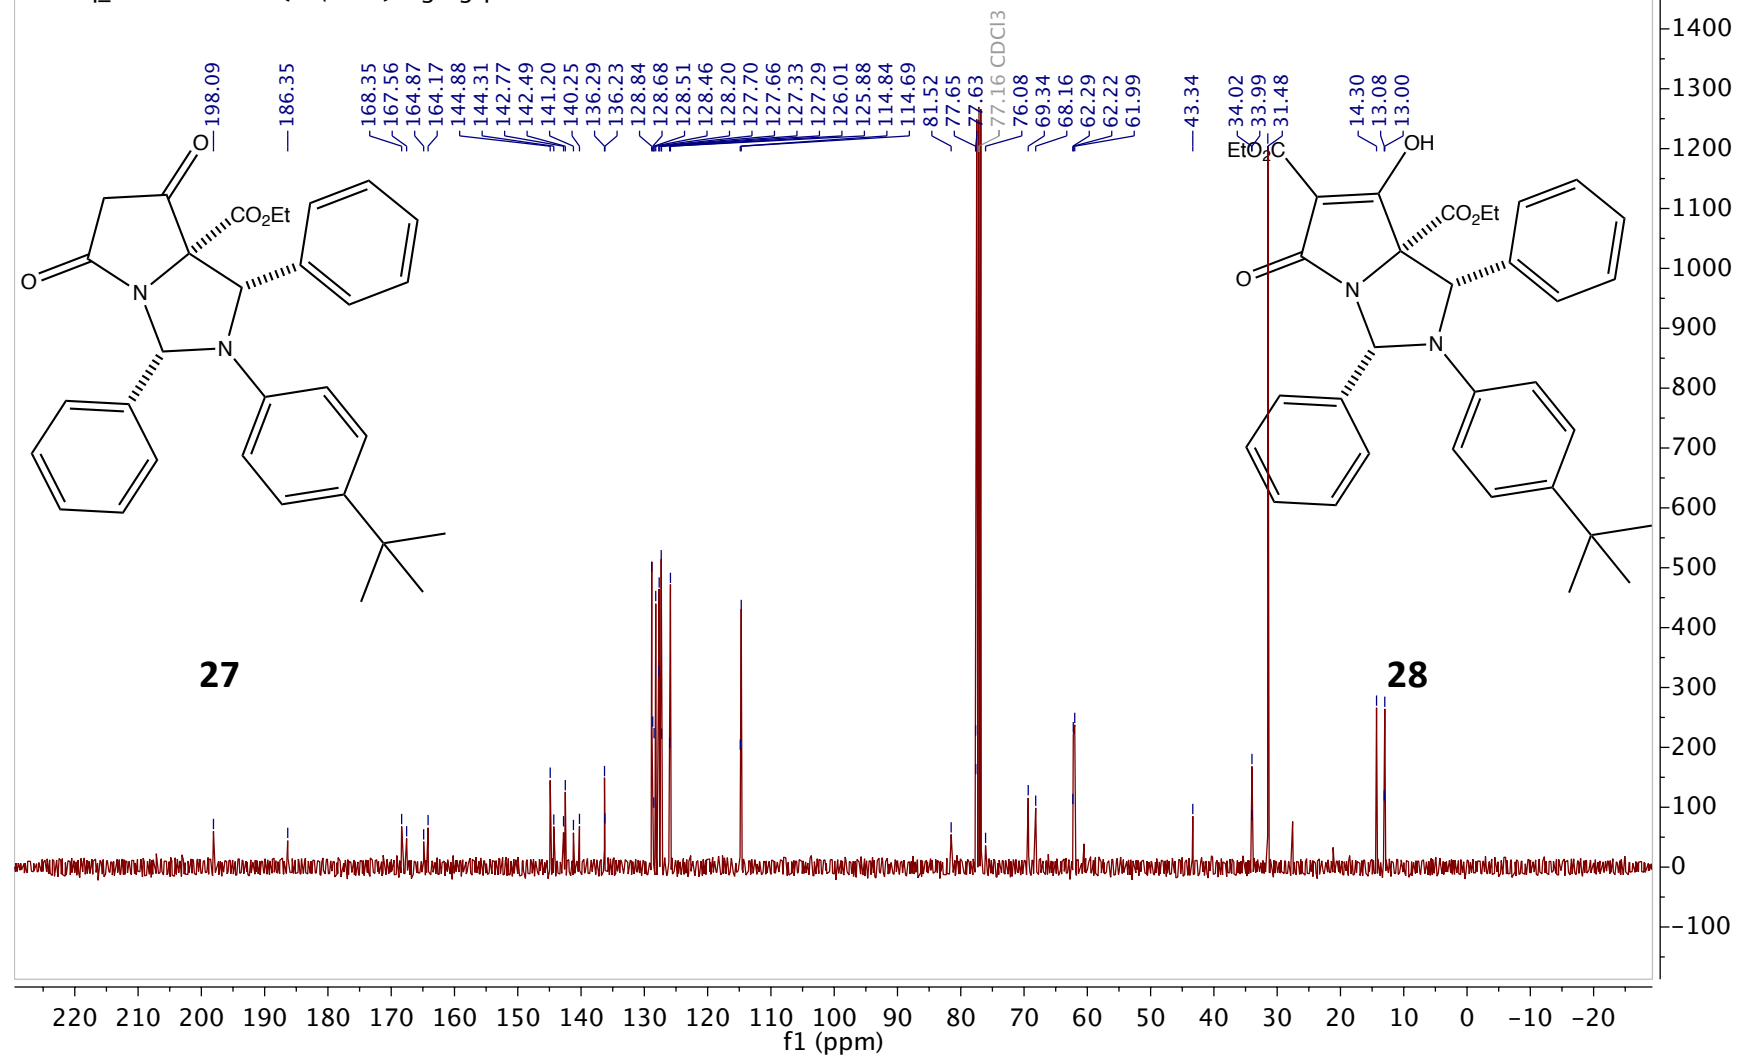

Supplement: d3ob00594a1.pdf [file d3ob00594a1.pdf]
